# Supplementary material for: Protecting group-free use of alcohols as carbon electrophiles in atom efficient aluminium triflate-catalysed dehydrative nucleophilic displacement reactions
Source: Royal Society of Chemistry journal article supplement (doi:10.1039/c7ra08784e), 2017-01-01

# Protecting group-free use of alcohols as carbon electrophiles in atom efficient aluminium triflate-catalysed dehydrative nucleophilic displacement reactions

Adam Cullen,<sup>a</sup> Alfred J. Muller<sup>a</sup> and D. Bradley G. Williams<sup>\*a,b</sup>

<sup>a</sup> Research Centre for Synthesis and Catalysis, University of Johannesburg, P.O. Box 564, Auckland Park, 2006, South Africa

<sup>b</sup> School of Mathematical and Physical Sciences, University of Technology Sydney, P.O. Box 123, Broadway, Sydney, NSW 2007, Australia. Bradley.williams@uts.edu.au

**Note on the order of presentation of experimental data.** Experimental methods and analytical data are presented in the order in which the compounds are presented in the main text. In instances where a particular substrate is the product of a set of reactions that have not been presented in the main text, the synthetic procedure leading to that substrate is presented *ahead* of the data for that substrate. In this way, some numbers appear out of place, but the logical order of the chemistry is maintained.

## Experimental

General Methods. Reactions were performed in oven-dried glassware under an atmosphere of argon. Reagents were used as supplied from commercial sources. Mass spectra were recorded on a double focusing sector instrument.

### General procedure for the Al(OTf)<sub>3</sub> catalysed nucleophilic substitution of benzhydrol

To a mixture of benzhydrol (0.200 g, 1.09 mmol) and Al(OTf)<sub>3</sub> (5 mg, 1 mol %) in nitroethane (2 mL) was added 1 equivalent of the appropriate nucleophile. The mixture was stirred for 1 hour at 70 °C and the reaction quenched by the addition of saturated aqueous sodium bicarbonate (5 mL). The reaction mixture was extracted with Et<sub>2</sub>O (3 × 5 mL), and the combined organic layers washed with water (2 × 5 mL) and dried over magnesium sulphate. The mixture was concentrated under reduced pressure and the residue purified by flash silica column chromatography using the eluents given below (for TLC analysis).

#### **1,1'-Oxybis(ethane-1,1-diyl)dibenzene (2)<sup>1</sup>**

244 mg, 1.08 mmol, >98%, clear oil, diastereomeric mixture (bold font and normal font represent each diastereomer); TLC: 0.89 (4:1 hexane/EtOAc); <sup>1</sup>H NMR: (400 MHz, CDCl<sub>3</sub>) δ<sub>H</sub>: 7.30–7.12 (m, 10H), 4.45 (q, 2H, *J* = 6.6 Hz), **4.17 (q, 2H, *J* = 6.6 Hz)**, 1.39 (d, 6H, *J* = 6.6 Hz), 1.31 (**d, 6H, *J* = 6.6 Hz**); <sup>13</sup>C NMR: (100 MHz, CDCl<sub>3</sub>) δ<sub>C</sub>: 144.2, **144.1**, 128.4, **128.2**, 127.3, **127.1**, 126.3, **126.2**, 74.6, **74.4**, 24.7, **23.0**; IR: ν<sub>max</sub> (ATR, cm<sup>-1</sup>) 3027, 2973, 2927, 1492, 1450, 1281, 1086, 759, 697, 425; EIMS (*m/z*): 105 (100%); ESI-HRMS: Calculated for [M]<sup>+</sup> C<sub>16</sub>H<sub>18</sub>O, 226.1358; found, 226.1335.

#### **Ethoxymethylenedibenzene (4a)<sup>2</sup>**

227 mg, 1.07 mmol, 98%, clear oil; TLC: 0.86 (4:1 hexane/EtOAc); <sup>1</sup>H NMR: (400 MHz, CDCl<sub>3</sub>) δ<sub>H</sub>: 7.40 (d, 4H, *J* = 7.2 Hz), 7.35 (t, 4H, *J* = 7.2 Hz), 7.30–7.25 (m, 2H), 5.40 (s, 1H), 3.56 (q, 2H, *J* = 7.2 Hz), 1.31 (t, 3H, *J* = 7.0 Hz); <sup>13</sup>C NMR: (75 MHz, CDCl<sub>3</sub>) δ<sub>C</sub>: 142.5, 128.3, 127.2, 126.9, 83.4, 64.4, 15.2; IR: ν<sub>max</sub> (ATR, cm<sup>-1</sup>) 3027, 2974, 2866, 1493, 1452, 1093, 1072, 739, 696, 414; EIMS (*m/z*): 212 ([M]<sup>+</sup>, 20%), 168 (20%), 167 (30%), 166 (20%),

136 (20%), 105 (20%); ESI-HRMS: Calculated for  $[M]^+$   $C_{15}H_{16}O$ , 212.1201; found, 212.1188.

### **Allyloxymethylenedibenzene (4b)<sup>3</sup>**

230 mg, 1.03 mmol, 94%, clear oil; TLC: 0.89 (4:1 hexane/EtOAc);  $^1H$  NMR: (300 MHz,  $CDCl_3$ )  $\delta_H$ : 7.34–7.22 (m, 10H), 5.98 (ddt, 1H,  $J = 17.3, 10.4, 5.7$  Hz), 5.43 (s, 1H), 5.31 (dq, 1H,  $J = 17.3, 1.8$  Hz), 5.20 (dq, 1H,  $J = 10.4, 1.6$  Hz), 4.02 (dt, 2H,  $J = 5.7, 1.5$  Hz);  $^{13}C$  NMR: (75 MHz,  $CDCl_3$ )  $\delta_C$ : 142.2, 134.8, 128.4, 127.4, 127.0, 116.9, 82.6, 69.7; IR:  $\nu_{max}$  (ATR,  $cm^{-1}$ ) 3028, 1725, 1658, 1449, 1276, 1027, 919, 696, 638, 464; EIMS ( $m/z$ ): 224 ( $[M]^+$ , 10%), 182 (80%), 168 (80%), 167 (100%), 165 (90%), 152 (70%), 147 (70%), 105 (90%); ESI-HRMS: Calculated for  $[M]^+$   $C_{16}H_{16}O$ , 224.1201; found, 224.1197.

### **Prop-2-ynyloxymethylenedibenzene (4c)<sup>4</sup>**

240 mg, 1.08 mmol, >98%, clear oil; TLC: 0.78 (4:1 hexane/EtOAc);  $^1H$  NMR: (300 MHz,  $CDCl_3$ )  $\delta_H$ : 7.51 (d, 4H,  $J = 7.6$  Hz), 7.45 (t, 4H,  $J = 7.4$  Hz), 7.37 (t, 2H,  $J = 7.2$  Hz), 5.82 (s, 1H), 4.28 (d, 2H,  $J = 2.4$  Hz), 2.56 (t, 1H,  $J = 2.0$  Hz);  $^{13}C$  NMR: (75 MHz,  $CDCl_3$ )  $\delta_C$ : 141.1, 128.3, 127.6, 127.1, 81.5, 79.6, 74.6, 55.6; IR:  $\nu_{max}$  (ATR,  $cm^{-1}$ ) 3288, 3028, 2855, 1493, 1452, 1259, 1065, 1026, 740, 696, 578, 468; EIMS ( $m/z$ ): 222 ( $[M]^+$ , 10%), 182 (60%), 168 (30%), 167 (90%), 166 (80%), 152 (50%), 145 (90%), 115 (30%), 105 (100%); ESI-HRMS: Calculated for  $[M]^+$   $C_{16}H_{14}O$ , 222.1045; found, 222.1028.

### **3-Benzhydrylpentane-2,4-dione (4d)<sup>5</sup>**

279 mg, 1.05 mmol, 96%, white solid; Mp: 111–113 °C; TLC: 0.33 (8:1 hexane/EtOAc);  $^1\text{H}$  NMR: (400 MHz,  $\text{CDCl}_3$ )  $\delta_{\text{H}}$ : 7.27 (d, 4H,  $J = 7.2$  Hz), 7.24 (t, 4H,  $J = 7.6$  Hz), 7.14 (t, 2H,  $J = 6.8$  Hz), 4.89 (d, 1H,  $J = 12.4$  Hz), 4.71 (d, 1H,  $J = 12.4$  Hz), 1.98 (s, 6H);  $^{13}\text{C}$  NMR: (75 MHz,  $\text{CDCl}_3$ )  $\delta_{\text{C}}$ : 202.7, 141.1, 128.7, 127.6, 126.8, 74.2, 51.0, 29.5; IR:  $\nu_{\text{max}}$  (ATR,  $\text{cm}^{-1}$ ) 2160, 2031, 1692, 1355, 1183, 1153, 756, 699, 539, 510, 416; EIMS ( $m/z$ ): 266 ( $[\text{M}]^+$ , 5%), 223 (50%), 167 (45%), 165 (50%); ESI-HRMS: Calculated for  $[\text{M}]^+$   $\text{C}_{18}\text{H}_{18}\text{O}_2$ , 266.1307; found 266.1325.

#### **Ethyl-2-benzhydryl-3-oxobutanoate (4e)<sup>5</sup>**

281 mg, 0.948 mmol, 87%, white solid; Mp: 84–86 °C; TLC: 0.35 (4:1 hexane/EtOAc);  $^1\text{H}$  NMR: (400 MHz,  $\text{CDCl}_3$ )  $\delta_{\text{H}}$ : 7.28–7.21 (m, 8H), 7.14–7.16 (m, 2H), 4.99 (d, 1H,  $J = 12.0$  Hz), 4.27 (d, 1H,  $J = 12.0$  Hz), 3.96 (q, 2H,  $J = 6.8$  Hz), 2.08 (s, 3H), 0.98 (t, 3H,  $J = 7.0$  Hz);  $^{13}\text{C}$  NMR: (75 MHz,  $\text{CDCl}_3$ )  $\delta_{\text{C}}$ : 201.8, 167.7, 141.4, 128.7, 127.7, 126.9, 65.2, 61.5, 50.9, 30.0, 13.8; IR:  $\nu_{\text{max}}$  (ATR,  $\text{cm}^{-1}$ ) 2159, 2028, 1736, 1361, 1144, 700, 495, 445; EIMS ( $m/z$ ): 278 (85%), 253 (25%), 207 (100%), 205 (55%), 178 (50%), 167 (60%), 165 (65%), 152 (35%); ESI-HRMS: Calculated for  $[\text{M}]^+$   $\text{C}_{19}\text{H}_{20}\text{O}_3$ , 296.1412; found, 296.1395.

#### **Benzhydryl(phenyl)sulphane (4f)<sup>6</sup>**

295 mg, 1.07 mmol, 98%, white solid; Mp: 76–80 °C; TLC: 0.55 (50:1 hexane/EtOAc);  $^1\text{H}$  NMR: (300 MHz,  $\text{CDCl}_3$ )  $\delta_{\text{H}}$ : 7.59–7.55 (m, 4H), 7.20–7.44 (m, 11H), 5.71 (s, 1H);  $^{13}\text{C}$  NMR: (75 MHz,  $\text{CDCl}_3$ )  $\delta_{\text{C}}$ : 140.9, 136.1, 130.4, 128.6, 128.4, 128.3, 127.1, 126.5, 57.3; IR:  $\nu_{\text{max}}$  (ATR,  $\text{cm}^{-1}$ ) 2159, 2028, 1479, 1024, 732, 694, 411; EIMS ( $m/z$ ): 276 ( $[\text{M}]^+$ , 10%), 168 (20%), 167 (80%), 165 (60%), 152 (30%); ESI-HRMS: Calculated for  $[\text{M}]^+$   $\text{C}_{19}\text{H}_{16}\text{S}$ , 276.0973; found, 276.1003.

#### **(*O*-*l*-Menthyl)methylenedibenzene (4g)<sup>7</sup>**

299 mg, 0.927 mmol, 85%, white solid; Mp: 68–70 °C; TLC: 0.74 (50:1 hexane/EtOAc); <sup>1</sup>H NMR: (300 MHz, CDCl<sub>3</sub>) δ<sub>H</sub>: 7.36–7.16 (m, 10H), 5.54 (s, 1H), 3.12 (td, 1H, *J* = 10.5, 4.3 Hz), 2.35 (t, 1H, *J* = 6.9 Hz), 2.16–2.12 (m, 1H), 1.60–1.53 (m, 2H), 1.32–1.23 (m, 2H), 0.97–0.80 (m, 9H), 0.42 (d, 3H, *J* = 6.6 Hz); <sup>13</sup>C NMR: (75 MHz, CDCl<sub>3</sub>) δ<sub>C</sub>: 143.8, 142.5, 128.2, 128.0, 127.9, 127.4, 126.8, 126.6, 79.8, 75.7, 48.7, 40.3, 34.5, 31.4, 25.0, 22.8, 22.4, 21.3, 15.6; IR: ν<sub>max</sub> (ATR, cm<sup>-1</sup>) 2941, 2159, 2031, 1453, 1044, 764, 737, 699, 613, 452; EIMS (*m/z*): 304 (20%), 180 (20%), 168 (80%), 167 (100%), 165 (80%), 152 (80%), 137 (70%); ESI-HRMS: Calculated for [M]<sup>+</sup> C<sub>23</sub>H<sub>30</sub>O, 322.2297; found, 322.2299.

#### **4-Benzhydrylphenol (4h)<sup>8</sup>**

238 mg, 0.914 mmol, 84%, light yellow solid; Mp: 110–113 °C (Lit. 112–115 °C); TLC: 0.23 (8:1 hexane/EtOAc); <sup>1</sup>H NMR: (400 MHz, CDCl<sub>3</sub>) δ<sub>H</sub>: 7.33 (t, 4H, *J* = 7.4 Hz), 7.26 (t, 2H, *J* = 7.2 Hz), 7.17 (d, 4H, *J* = 7.2 Hz), 7.02 (d, 2H, *J* = 8.4 Hz), 6.77 (d, 2H, *J* = 8.8 Hz), 5.54 (s, 1H); <sup>13</sup>C NMR: (75 MHz, CDCl<sub>3</sub>) δ<sub>C</sub>: 153.7, 144.1, 136.2, 130.5, 129.3, 128.2, 126.2, 115.1, 55.9; IR: ν<sub>max</sub> (ATR, cm<sup>-1</sup>) 3022, 2160, 2031, 1510, 1450, 1237, 698, 565, 446; EIMS (*m/z*): 260 ([M]<sup>+</sup>, 100%), 259 (35%), 229 (25%), 183 (80%), 181 (35%), 165 (60%), 152 (30%); ESI-HRMS: Calculated for [M]<sup>+</sup> C<sub>19</sub>H<sub>16</sub>O, 260.1201; found, 260.1193.

#### **1-Benzhydrylnaphthalen-2-ol (4i)<sup>9</sup>**

332 mg, 1.07 mmol, 98%, white foam; TLC: 0.44 (8:1 hexane/EtOAc); <sup>1</sup>H NMR: (400 MHz, CDCl<sub>3</sub>) δ<sub>H</sub>: 8.20 (d, 1H, *J* = 8.8 Hz), 7.94 (d, 1H, *J* = 8.0 Hz), 7.89 (d, 1H, *J* = 8.8 Hz), 7.56

(t, 1H,  $J = 7.4$  Hz), 7.35–7.49 (m, 11 H), 7.25 (d, 1H,  $J = 9.2$  Hz), 6.63 (s, 1H), 5.44 (s, 1H);  $^{13}\text{C}$  NMR: (75 MHz,  $\text{CDCl}_3$ )  $\delta_{\text{C}}$ : 152.7, 141.6, 133.3, 129.6, 129.0, 128.9, 128.7, 128.2, 127.1, 126.7, 125.2, 123.1, 122.8, 120.2, 119.7, 48.4; IR:  $\nu_{\text{max}}$  (ATR,  $\text{cm}^{-1}$ ) 3498, 2160, 2031, 1598, 1465, 1202, 815, 745, 700, 508; EIMS ( $m/z$ ): 310 ( $[\text{M}]^+$ , 100%), 307 (70%), 233 (20%), 231 (90%), 215 (30%), 202 (35%), 167 (60%), 165 (45%); ESI-HRMS: Calculated for  $[\text{M}]^+$   $\text{C}_{23}\text{H}_{18}\text{O}$ , 310.1358; found, 310.1348.

### **3-Benzhydryl-1H-indole (4j)<sup>10</sup>**

247 mg, 0.872 mmol, 80%, white solid; Mp: 113–115 °C; TLC: 0.39 (8:1 hexane/EtOAc);  $^1\text{H}$  NMR: (400 MHz,  $\text{CDCl}_3$ )  $\delta_{\text{H}}$ : 7.79 (s, 1H), 7.25–7.36 (m, 12H), 7.22 (t, 1H,  $J = 7.6$  Hz), 7.05 (t, 1H,  $J = 7.4$  Hz), 6.55 (d, 1H,  $J = 1.6$  Hz), 5.73 (s, 1H);  $^{13}\text{C}$  NMR: (75 MHz,  $\text{CDCl}_3$ )  $\delta_{\text{C}}$ : 143.9, 136.6, 129.0, 128.2, 126.9, 126.2, 124.0, 122.0, 119.8, 119.8, 119.3, 111.0, 48.7; IR:  $\nu_{\text{max}}$  (ATR,  $\text{cm}^{-1}$ ) 3379, 2160, 2029, 1450, 746, 696, 504; EIMS ( $m/z$ ): 283 ( $[\text{M}]^+$ , 90%), 282 (25%), 206 (100%), 204 (30%); ESI-HRMS: Calculated for  $[\text{M}]^+$   $\text{C}_{21}\text{H}_{17}\text{N}$ , 283.1361; found, 283.1356.

### **Methyl 5-O-benzhydryl-2,3-isopropylidene- $\beta$ -D-ribose (4k)**

291 mg, 0.786 mmol, 72%, white solid; Mp: 75–79 °C; TLC: 0.43 (8:1 Hexane:EtOAc);  $^1\text{H}$  NMR: (300 MHz,  $\text{CDCl}_3$ )  $\delta_{\text{H}}$  7.41 (d, 4H,  $J = 7.5$  Hz), 7.34 (t, 4H,  $J = 5.9$  Hz), 7.27 (d, 2H,  $J = 6.9$  Hz), 5.41 (s, 1H), 5.01 (s, 1H), 4.76 (d, 1H,  $J = 5.9$  Hz), 4.61 (d, 1H,  $J = 5.9$  Hz), 4.51 (t, 1H,  $J = 6.9$  Hz), 3.47–3.60 (m, 2H), 3.27 (s, 3H), 1.54 (s, 3H), 1.35 (s, 3H);  $^{13}\text{C}$  NMR: (75 MHz,  $\text{CDCl}_3$ )  $\delta_{\text{C}}$  : 141.9, 141.8, 128.2, 127.3, 127.3, 126.8, 126.8, 112.1, 109.2, 85.2, 85.1, 82.1, 82.1, 69.8, 54.6, 26.4, 24.9; IR:  $\nu_{\text{max}}$  (ATR,  $\text{cm}^{-1}$ ) 2941, 2509, 2159, 2029, 1976, 1453,

1092, 1059, 1047, 873, 696, 449; EIMS ( $m/z$ ): 323 (30%), 207 (20%), 183 (20%), 167 (100%); ESI-HRMS: Calculated for  $[M]^+$  C<sub>22</sub>H<sub>26</sub>O<sub>5</sub>, 370.1780; found, 370.1776.

### Benylation of phenols

To a solution of benzyl chloride (0.245 mL, 2.10 mmol) and *n*-TBAB (69 mg, 10 mol %) in toluene (2 mL) was added 1.5 equivalents of the phenol. KOH (0.238 g, 2.1 mmol) dissolved in water (2 mL) was added to the reaction mixture. This mixture was heated to 80 °C for 12 hours. The reaction mixture was diluted with Et<sub>2</sub>O (10 mL), washed with water (2 × 5 mL) and dried over magnesium sulphate. The organic solvent was removed under reduced pressure and the resulting residue purified by flash silica column chromatography using the eluents as detailed below (for TLC analysis)

### **Benzylphenyl ether (5a)<sup>11</sup>**

379 mg, 2.06 mmol, 98%, white solid; Mp: 30–33 °C; TLC: 0.64 (20:1 hexane/EtOAc); <sup>1</sup>H NMR: (300 MHz, CDCl<sub>3</sub>) δ<sub>H</sub>: 7.37–7.55 (m, 8H), 7.09 (d, 2H, *J* = 8.7 Hz), 5.14 (s, 2H); <sup>13</sup>C NMR: (75 MHz, CDCl<sub>3</sub>) δ<sub>C</sub>: 158.7, 137.0, 129.4, 128.5, 127.8, 127.4, 120.9, 114.8, 69.8; IR: ν<sub>max</sub> (ATR, cm<sup>-1</sup>) 3036, 2907, 2159, 32031, 1584, 1490, 1455, 1376, 1237, 1169, 1011, 742, 689, 506; EIMS ( $m/z$ ): 184 ( $[M]^+$ , 10%), 91 (100%); ESI-HRMS: Calculated for  $[M]^+$  C<sub>13</sub>H<sub>12</sub>O, 184.0888; found, 184.0882.

### ***p*-Cresyl benzyl ether (5b)<sup>11,12</sup>**

412 mg, 2.08 mmol, >98%, white solid; Mp: 100–102 °C; TLC: 0.68 (10:1 hexane/EtOAc); <sup>1</sup>H NMR: (300 MHz, CDCl<sub>3</sub>) δ<sub>H</sub>: 7.45–7.32 (m, 5H), 7.10 (d, 2H, *J* = 8.1 Hz), 6.89 (d, 2H, *J*

= 8.1 Hz), 5.05 (s, 2H), 2.30 (s, 3H);  $^{13}\text{C}$  NMR: (75 MHz,  $\text{CDCl}_3$ )  $\delta_{\text{C}}$ : 156.7, 137.3, 130.1, 129.9, 128.5, 127.8, 127.4, 114.7, 70.0, 20.5; IR:  $\nu_{\text{max}}$  (ATR,  $\text{cm}^{-1}$ ) 2159, 1610, 1508, 1381, 1236, 1009, 807, 732, 694, 409; EIMS ( $m/z$ ): 198 ( $[\text{M}]^+$ , 10%), 91 (100%); ESI-HRMS: Calculated for  $[\text{M}]^+ \text{C}_{14}\text{H}_{14}\text{O}$ , 198.1045; found, 198.1046.

#### Al(OTf)<sub>3</sub> catalysed rearrangement of phenol derived benzylic ethers

To a solution of  $\text{Al}(\text{OTf})_3$  (5 mg, 1 mol %) in nitroethane (2 mL) was added benzyl ether **5a** or **5b** (1.0 mmol) and the mixture was heated at 80 °C for 5 hours. The reaction was quenched by the addition of saturated aqueous sodium bicarbonate (5 mL). The reaction mixture was extracted with  $\text{Et}_2\text{O}$  (3 × 5 mL), and the combined organic layers washed with water (2 × 5 mL) and dried over magnesium sulphate. The solvent was removed under reduced pressure and the residue purified by flash silica column chromatography (10:1 hexane/EtOAc).

#### **2-Benzylphenol (6a)<sup>13</sup>**

181 mg, 0.98 mmol, 98%, yellow oil; TLC: 0.52 (10:1 hexane/EtOAc);  $^1\text{H}$  NMR: (300 MHz,  $\text{CDCl}_3$ )  $\delta_{\text{H}}$ : 7.22–7.32 (m, 5H), 7.15–7.11 (m, 2H), 6.89 (t, 1H,  $J = 7.4$  Hz), 6.78 (d, 1H,  $J = 7.5$  Hz), 4.71 (br s, 1H), 4.00 (s, 2H);  $^{13}\text{C}$  NMR: (75 MHz,  $\text{CDCl}_3$ )  $\delta_{\text{C}}$ : 153.7, 139.8, 131.0, 128.7, 128.6, 127.8, 126.9, 126.3, 120.9, 115.7, 36.3; IR:  $\nu_{\text{max}}$  (ATR,  $\text{cm}^{-1}$ ) 3531, 3026, 1921, 2442, 2159, 2029, 1976, 1493, 1452, 1167, 1093, 752, 728, 696, 492; EIMS ( $m/z$ ): 184 ( $[\text{M}]^+$ , 100%), 183 (50%), 165 (50%), 106 (50%); ESI-HRMS: Calculated for  $[\text{M}]^+ \text{C}_{13}\text{H}_{12}\text{O}$ , 184.0888; found, 184.0779.



## 2-Benzyl-4-methylphenol (6b)<sup>14</sup>

196 mg, 0.99 mmol, >98%, clear oil; TLC: 0.53 (10:1 hexane/EtOAc); <sup>1</sup>H NMR: (300 MHz, CDCl<sub>3</sub>) δ<sub>H</sub>: 7.32–7.24 (m, 5H), 6.93–6.91 (m, 2H), 6.67 (d, 1H, *J* = 8.7 Hz), 4.59 (s, 1H), 3.96 (s, 2H), 2.26 (s, 3H); <sup>13</sup>C NMR: (75 MHz, CDCl<sub>3</sub>) δ<sub>C</sub>: 151.4, 140.0, 131.5, 130.1, 128.6, 128.1, 126.7, 126.3, 115.6, 36.3, 20.5; IR: ν<sub>max</sub> (ATR, cm<sup>-1</sup>) 3529, 3026, 2921, 2521, 2159, 2030, 1494, 1452, 1185, 1101, 810, 696, 435; EIMS (*m/z*): 198 ([M]<sup>+</sup>, 100%), 183 (30%), 165 (20%), 120 (50%); ESI-HRMS: Calculated for [M]<sup>+</sup> C<sub>14</sub>H<sub>14</sub>O, 198.1045; found, 198.1051.

## General procedure for the Al(OTf)<sub>3</sub> catalysed nucleophilic substitution of *trans*-1,3-diphenylprop-2-en-1-ol (7)

To a mixture of *trans*-1,3-diphenylprop-2-en-1-ol (0.231 g, 1.1 mmol) and Al(OTf)<sub>3</sub> (5 mg, 1 mol %) in nitroethane (2 mL) was added 1 equivalent of the appropriate nucleophile. The mixture was allowed to stir for 1 hour at room temperature and the reaction was quenched by the addition of saturated aqueous sodium bicarbonate (5 mL). The reaction mixture was extracted with Et<sub>2</sub>O (3 × 5 mL), the combined organic layers washed with water (2 × 5 mL) and dried with magnesium sulphate. The solvent was removed under reduced pressure and the residue purified by flash silica column chromatography using the eluents given below.

## 1-Ethoxy-1,3-diphenylpropene (8a)<sup>15</sup>

223 mg, 0.936 mmol, 85%, clear oil; TLC: 0.51 (50:1 hexane/EtOAc); <sup>1</sup>H NMR: (300 MHz, CDCl<sub>3</sub>) δ<sub>H</sub>: 7.43–7.18 (m, 10H), 6.61 (d, 1H, *J* = 15.9 Hz), 6.31 (dd, 1H, *J* = 16.1, 7.0 Hz), 4.92 (d, 1H, *J* = 7.2 Hz), 3.59 (dq, 1H, *J* = 9.1, 7.0 Hz), 3.49 (dq, 1H, *J* = 9.3, 7.2 Hz), 1.27 (t,

3H,  $J = 7.0$  Hz);  $^{13}\text{C}$  NMR: (75 MHz,  $\text{CDCl}_3$ )  $\delta_{\text{C}}$ : 141.5, 136.6, 131.1, 130.6, 128.5, 127.6, 126.8, 126.6, 82.5, 64.0, 15.3; IR:  $\nu_{\text{max}}$  (ATR,  $\text{cm}^{-1}$ ) 2159, 2030, 1720, 2602, 1450, 1214, 1097, 1017, 747, 696, 499; EIMS ( $m/z$ ): 238 ( $[\text{M}]^+$ , 100%); ESI-HRMS: Calculated for  $[\text{M}]^+$   $\text{C}_{17}\text{H}_{18}\text{O}$ , 238.1358; found, 238.1343.

### **1-Allyloxy-1,3-diphenylpropene (8b)<sup>16</sup>**

231 mg, 0.923 mmol, 84%, clear oil; TLC: 0.52 (50:1 hexane/EtOAc);  $^1\text{H}$  NMR: (300 MHz,  $\text{CDCl}_3$ )  $\delta_{\text{H}}$ : 7.49–7.24 (m, 10H), 6.68 (d, 1H,  $J = 16.2$  Hz), 6.36 (dd, 1H,  $J = 15.8, 7.1$  Hz), 6.03 (ddt, 1H,  $J = 17.2, 9.9$  Hz), 5.38 (dq, 1H,  $J = 17.2, 1.7$  Hz), 5.26 (dq, 1H,  $J = 9.9, 5.2$  Hz), 5.04 (d, 1H,  $J = 7.2$  Hz), 4.10 (dt, 2H,  $J = 9.9, 1.5$  Hz);  $^{13}\text{C}$  NMR: (75 MHz,  $\text{CDCl}_3$ )  $\delta_{\text{C}}$ : 141.1, 136.5, 134.8, 131.3, 130.2, 128.5, 127.7, 127.6, 126.8, 126.5, 116.9, 81.7, 69.2; IR:  $\nu_{\text{max}}$  (ATR,  $\text{cm}^{-1}$ ) 3030, 2159, 2029, 1719, 1450, 1269, 1025, 748, 696, 483; EIMS ( $m/z$ ): 192 (100%), 191 (60%), 189 (30%), 165 (50%), 115 (40%), 105 (30%), 77 (40%); ESI-HRMS:  $\text{M}^+$  Calcd for  $\text{C}_{18}\text{H}_{18}\text{O}$ , 250.1358; found, 250.1352.

### **2-Propynyloxy-1,3-diphenylpropene (8c)<sup>17</sup>**

262 mg, 1.06 mmol, 96%, clear oil; TLC: 0.33 (50:1 hexane/EtOAc);  $^1\text{H}$  NMR: (300 MHz,  $\text{CDCl}_3$ )  $\delta_{\text{H}}$ : 7.44–7.20 (m, 10H), 6.66 (d, 1H,  $J = 15.9$  Hz), 6.29 (d, 1H,  $J = 16.1, 7.7$  Hz), 5.20 (d, 1H,  $J = 7.2$  Hz), 4.24 (dd, 1H,  $J = 15.5, 2.5$  Hz), 4.14 (dd, 1H,  $J = 15.6, 2.4$  Hz), 2.45 (t, 1H,  $J = 1.9$  Hz);  $^{13}\text{C}$  NMR: (75 MHz,  $\text{CDCl}_3$ )  $\delta_{\text{C}}$ : 140.2, 136.4, 132.4, 129.1, 128.6, 127.9, 127.1, 126.6, 80.9, 79.8, 74.4, 55.3; IR:  $\nu_{\text{max}}$  (ATR,  $\text{cm}^{-1}$ ) 3288, 3029, 2511, 2159, 2030, 1494, 1450, 1068, 1026, 967, 746, 695, 458; ESI-HRMS: Calculated for  $[\text{M}]^+$   $\text{C}_{18}\text{H}_{16}\text{O}$ , 248.1201; found, 248.1218.

### **3-(1,3-Diphenylprop-2-en-1-yl)pentane-2,4-dione (8d)<sup>15</sup>**

315 mg, 1.08 mmol, 98%, white solid; Mp: 78–80 °C; TLC: 0.54 (4:1 hexane/EtOAc); <sup>1</sup>H NMR: (300 MHz, CDCl<sub>3</sub>) δ<sub>H</sub>: 7.31–7.18 (m, 10H), 6.45 (d, 1H, *J* = 15.9 Hz), 6.23 (dd, 1H, *J* = 15.4, 7.1 Hz), 4.38–4.36 (m, 2H), 2.24 (s, 3H), 1.92 (s, 3H); <sup>13</sup>C NMR: (75 MHz, CDCl<sub>3</sub>) δ<sub>C</sub>: 202.4, 202.3, 139.9, 136.6, 131.3, 129.1, 128.7, 128.3, 127.7, 127.4, 127.0, 126.1, 74.1, 48.9, 29.8, 29.5; IR: ν<sub>max</sub> (ATR, cm<sup>-1</sup>) 3026, 2918, 2439, 2160, 1976, 2721, 1359, 1138, 974, 693, 420; EIMS (*m/z*): 274 (40%), 249 (80%), 232 (35%), 193 (65%), 191 (50%), 178 (45%), 115 (95%), 91 (100%); ESI-HRMS: Calculated for [M]<sup>+</sup> C<sub>20</sub>H<sub>20</sub>O<sub>2</sub>, 292.1463; found, 292.1461.

### **Ethyl 2-(1,3-diphenylprop-2-en-1-yl)acetylacetonate (8e)<sup>15</sup>**

348 mg, 1.08 mmol, 98%, clear oil, diastereomeric mixture – the two sets of data below represent each set of enantiomers; TLC: 0.5 (8:1 hexane/EtOAc); <sup>1</sup>H NMR: (300 MHz, CDCl<sub>3</sub>) δ<sub>H</sub>: 7.48–7.33 (m, 10H), 6.61 (d, 1H, *J* = 11.1 Hz), **6.56 (d, 1H, *J* = 11.4 Hz)**, 6.44 (dd, 1H, *J* = 15.9, 8.1 Hz), **6.38 (dd, 1H, *J* = 15.1, 8.2 Hz)**, 4.43 (t, 1H, *J* = 9.8 Hz), 4.36–4.20 (m, 3H), **4.08 (q, 2H, *J* = 6.9 Hz)**, 2.44 (s, 3H), **2.18 (s, 3H)**, 1.35 (t, 3H, *J* = 8.1 Hz), **1.12 (t, 3H, *J* = 7.0 Hz)**; <sup>13</sup>C NMR: (75 MHz, CDCl<sub>3</sub>) δ<sub>C</sub>: 201.6, **201.4**, 167.8, **167.5**, 140.3, **140.1**, 136.7, **136.6**, 131.7, **131.4**, 129.4, **129.2**, 128.8, **128.6**, 128.4, 127.9, **127.9**, 127.5, **127.5**, 127.1, **127.0**, 126.3, **126.2**, 65.4, **65.1**, 61.5 (OCH<sub>2</sub>CH<sub>3</sub>), **61.3**, **48.7**, 30.0, **29.8**, 14.1; IR: ν<sub>max</sub> (ATR, cm<sup>-1</sup>) 3028, 2512, 2159, 2028, 1452, 1153, 965, 745, 685, 486; EIMS (*m/z*): 304 (95%), 279 (15%), 233 (50%), 193 (80%), 115 (95%), 91 (45%); EI-HRMS: Calculated for [M]<sup>+</sup> C<sub>21</sub>H<sub>22</sub>O<sub>3</sub>, 322.1569; found, 322.1556.

**(1,3-Diphenylprop-2-en-1-yl)(phenyl)sulphane (8f)<sup>18</sup>**

304 mg, 0.943 mmol, 86%, white solid; Mp: 69–72 °C; TLC: 0.49 (50:1 hexane/EtOAc); <sup>1</sup>H NMR: (300 MHz, CDCl<sub>3</sub>) δ<sub>H</sub>: 7.56–7.27 (m, 10H), 6.60 (dd, 1H, *J* = 15.5, 8.2 Hz), 6.42 (d, 1H, *J* = 15.3 Hz), 5.06 (d, 1H, *J* = 8.1 Hz); <sup>13</sup>C NMR: (75 MHz, CDCl<sub>3</sub>) δ<sub>C</sub>: 140.1, 136.6, 134.8, 133.0, 131.4, 129.0, 128.6, 128.4, 127.9, 127.5, 127.4, 126.4; IR: ν<sub>max</sub> (ATR, cm<sup>-1</sup>) 3060, 3027, 2509, 2160, 2030, 1478, 1438, 1025, 968, 739, 687, 487; ESI-HRMS: Calculated for [M]<sup>+</sup> C<sub>21</sub>H<sub>17</sub>S, 301.1051; found, 301.1059.

**4-(1,3-Diphenylprop-2-en-1-yl)phenol (8g)<sup>15</sup>**

273 mg, 0.903 mmol, 82%, yellow oil; TLC: 0.44 (10:1 toluene/EtOAc); <sup>1</sup>H NMR: (300 MHz, CDCl<sub>3</sub>) δ<sub>H</sub>: 7.37–7.16 (m, 10H), 7.08 (d, 2H, *J* = 8.1 Hz), 6.77 (d, 2H, *J* = 7.8 Hz), 6.63 (dd, 1H, *J* = 15.9, 7.5 Hz), 6.31 (d, 1H, *J* = 16.1 Hz), 4.82 (d, 1H, *J* = 7.5 Hz), 4.74 (s, 1H); <sup>13</sup>C NMR: (75 MHz, CDCl<sub>3</sub>) δ<sub>C</sub>: 153.9, 143.7, 137.3, 135.8, 132.8, 131.1, 129.8, 128.6, 128.5, 128.4, 127.3, 126.4, 126.4, 115.3, 53.3; IR: ν<sub>max</sub> (ATR, cm<sup>-1</sup>) 3317, 3025, 2494, 2159, 2030, 1510, 1171, 744, 695, 475; EIMS (*m/z*): 286 ([M]<sup>+</sup>, 50%), 209 (35%), 208 (100%), 207 (70%), 192 (70%), 165 (35%), 121 (90%), 105 (50%); ESI-HRMS: Calculated for [M]<sup>+</sup> C<sub>21</sub>H<sub>18</sub>O, 286.1358; found, 286.1351.

**1-(1,3-Diphenylprop-2-en-1-yl)naphthalen-2-ol (8h)<sup>19</sup>**

300 mg, 0.892 mmol, 81%, yellow oil; TLC: 0.44 (8:1 hexane/EtOAc); <sup>1</sup>H NMR: (300 MHz, CDCl<sub>3</sub>) δ<sub>H</sub>: 7.98 (d, 1H, *J* = 8.7 Hz), 7.79 (d, 1H, *J* = 7.8 Hz), 7.73 (d, 1H, *J* = 8.7 Hz), 7.43 (t, 1H, *J* = 7.0 Hz), 7.20–7.38 (m, 11H), 7.10 (d, 1H, *J* = 8.7 Hz), 6.97 (dd, 1H, *J* = 6.6, 1.2 Hz), **6.91 (dd, 1H, *J* = 7.1, 1.0 Hz)**, 6.49 (d, 1H, *J* = 15.6 Hz), 5.87 (d, 1H, *J* = 6.6 Hz), 5.52

(s, 1H);  $^{13}\text{C}$ NMR: (75 MHz,  $\text{CDCl}_3$ )  $\delta_{\text{C}}$ : 152.2, 141.6, 136.7, 133.1, **133.0**, 130.0, **129.7**, 129.3, 128.9, 128.8, 128.5, 128.0, 127.6, 126.8, 126.7, 126.4, 123.2, 123.0, 119.7, 119.1, 45.2; IR:  $\nu_{\text{max}}$  (ATR,  $\text{cm}^{-1}$ ) 2361, 2159, 2031, 1260, 813, 692, 48; EIMS ( $m/z$ ): 336 ( $[\text{M}]^+$ , 50%), 334 (90%), 260 (35%), 257 (90%), 245 (95%), 231 (95%), 215 (80%), 202 (60%), 115 (40%), 105 (40%); ESI-HRMS: Calculated for  $[\text{M}]^+ \text{C}_{25}\text{H}_{20}\text{O}$ , 336.1514; found, 336.1499.

### **3-(1,3-Diphenylprop-2-en-1-yl)-1H-indole (8i)<sup>15</sup>**

296 mg, 0.957 mmol, 87%, yellow oil; TLC: 0.36 (8:1 hexane/EtOAc);  $^1\text{H}$  NMR: (300 MHz,  $\text{CDCl}_3$ )  $\delta_{\text{H}}$ : 7.87 (s, 1H), 7.53 (d, 1H,  $J = 8.1$  Hz), 7.45–7.22 (m, 12H), 7.12 (t, 1H,  $J = 7.5$  Hz), 6.88 (d, 1H,  $J = 2.3$  Hz), 6.82 (dd, 1H,  $J = 15.7, 7.4$  Hz), 6.53 (d, 1H,  $J = 15.9$  Hz), 5.20 (d, 1H,  $J = 7.2$  Hz);  $^{13}\text{C}$  NMR: (75 MHz,  $\text{CDCl}_3$ )  $\delta_{\text{C}}$ : 143.3, 137.4, 136.6, 132.5, 130.5, 128.4, 128.4, 127.1, 126.7, 126.3, 126.3, 122.6, 122.0, 119.8, 119.4, 118.5, 111.1, 46.1; IR:  $\nu_{\text{max}}$  (ATR,  $\text{cm}^{-1}$ ) 3057, 2923, 2509, 2160, 1977, 1695, 1450, 742, 695, 511; EIMS ( $m/z$ ): 309 ( $[\text{M}]^+$ , 5%), 208 (25%), 207 (35%), 149 (30%), 105 (35%), 77 (50%); ESI-HRMS: Calculated for  $[\text{M}]^+ \text{C}_{23}\text{H}_{19}\text{N}$ , 309.1517; found, 309.1506.

### **N-Benzhydryl-4-methylbenzenesulphonamide (9a)<sup>20</sup>**

364 mg, 1.08 mmol, 98%, white solid; Mp: 150–152 °C; TLC: 0.46 (4:1 hexane/EtOAc);  $^1\text{H}$  NMR: (300 MHz,  $\text{CDCl}_3$ )  $\delta_{\text{H}}$ : 7.55 (d, 2H,  $J = 7.8$  Hz), 7.16–7.07 (m, 12 H), 5.67 (d, 1H,  $J = 7.7$  Hz), 5.57 (d, 1H,  $J = 7.7$  Hz), 2.34 (s, 3H);  $^{13}\text{C}$  NMR: (75 MHz,  $\text{CDCl}_3$ )  $\delta_{\text{C}}$ : 143.0, 140.5, 137.3, 129.2, 128.4, 127.4, 127.3, 127.1, 61.2, 21.4; IR:  $\nu_{\text{max}}$  (ATR,  $\text{cm}^{-1}$ ) 3246, 2159, 2030, 1450, 1313, 1157, 1058, 698, 672, 406; EIMS ( $m/z$ ): 218 (10%), 207 (30%), 182 (70%), 91 (100%); ESI-HRMS: Calculated for  $[\text{M}]^+ \text{C}_{20}\text{H}_{19}\text{NO}_2\text{S}$ , 337.1136; found, 337.1125.

**(E)-N-(1,3-Diphenyl-prop-2-en-1-yl)-4-methylbenzenesulphonamide (9b)**<sup>15</sup>

396 mg, 1.09 mmol, >98%, white solid; Mp: 130–132 °C; TLC: 0.43 (4:1 hexane/EtOAc); <sup>1</sup>H NMR: (300 MHz, CDCl<sub>3</sub>) δ<sub>H</sub>: 7.67 (d, 2H, *J* = 8.1 Hz), 7.21–7.11 (m, 10H), 7.10 (d, 2H, *J* = 8.1 Hz), 6.33 (1H, *J* = 15.9 Hz), 6.07 (d, 1H, *J* = 15.9, 6.6 Hz), 5.58 (d, 1H, *J* = 7.5 Hz), 5.11 (t, 1H, *J* = 7.0 Hz), 2.28 (s, 3H); <sup>13</sup>C NMR: (75 MHz, CDCl<sub>3</sub>) δ<sub>C</sub>: 143.1, 139.6, 137.7, 136.0, 131.9, 129.3, 128.6, 128.3, 128.1, 127.7, 127.6, 127.2, 127.0, 126.4, 59.7, 21.3; IR: ν<sub>max</sub> (ATR, cm<sup>-1</sup>) 3290, 3028, 2480, 2160, 1977, 1425, 1324, 1292, 1151, 966, 751, 667, 447; EIMS (*m/z*): 192 (70%), 191 (40%), 165 (20%), 91 (100%); ESI-HRMS: Calculated for [M]<sup>+</sup> C<sub>22</sub>H<sub>21</sub>NO<sub>2</sub>S, 363.1293; found, 363.1297.

General procedure for the α-bromination of acetophenones

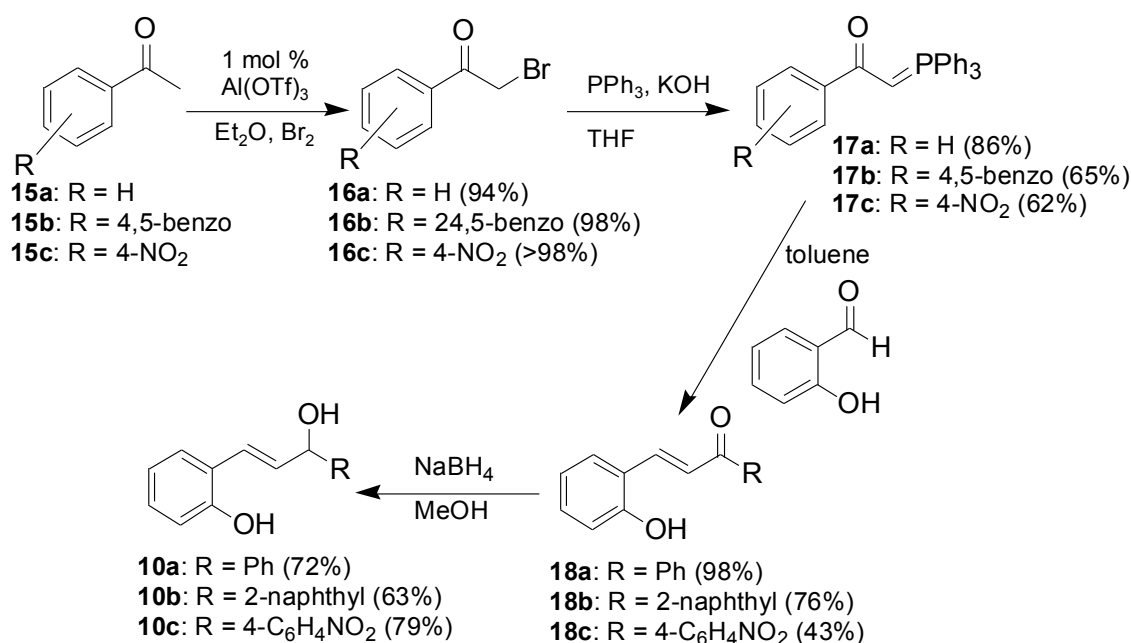

**Scheme S1.** Synthesis of phenylpropenols **10**.

Acetophenones **15** (Scheme S1, 8.32 mmol), respectively, and Al(OTf)<sub>3</sub> (39 mg, 82 μmol) were dissolved in Et<sub>2</sub>O (5 mL) in a two necked flask equipped with a reflux condenser. To this solution was added bromine (0.42 mL, 8.32 mmol) by means of a dropping funnel so as to maintain a gentle reflux. Upon completion of the addition of bromine the solvent was removed under reduced pressure, under a constant stream of nitrogen using an aqueous sodium bicarbonate trap to scrub the HBr. The residue was washed with *n*-hexane (5 mL) and then water (5 × 10 mL). The white solid product was collected and dried under reduced pressure and required no further purification.

### **2-Bromo-1-phenylethanone (16a)**<sup>21</sup>

1.557 g, 7.82 mmol, 94%, white solid; Mp: 42–45 °C; <sup>1</sup>H NMR: (400 MHz, CDCl<sub>3</sub>) δ<sub>H</sub>: 7.97 (d, 2H, *J* = 8.0 Hz), 7.59 (t, 1H, *J* = 7.4 Hz), 7.48 (t, 2H, *J* = 7.4 Hz), 4.44 (s, 2H); <sup>13</sup>C NMR: (100 MHz, CDCl<sub>3</sub>) δ<sub>C</sub>: 191.3, 133.9, 129.7, 128.9, 128.8, 30.9; IR: ν<sub>max</sub> (ATR, cm<sup>-1</sup>) 3065, 3002, 1953, 1476, 2160, 2028, 1690, 1580, 1447, 1389, 1281, 1196, 991, 745, 685, 620, 504.

### **2-Bromo-1-(naphthalen-2-yl)ethanone (16b)**<sup>22</sup>

2.031 g, 8.15 mmol, 98%, white solid; Mp: 79–81 °C; <sup>1</sup>H NMR: (400 MHz, CDCl<sub>3</sub>) δ<sub>H</sub>: 8.49 (s, 1H), 8.00 (d, 1H, *J* = 8.4 Hz), 7.96 (d, 1H, *J* = 8.0 Hz), 7.91–7.86 (m, 2H), 7.61 (t, 1H, *J* = 7.6 Hz), 7.56 (t, 1H, *J* = 7.6 Hz), 4.56 (s, 2H); <sup>13</sup>C NMR: (100 MHz, CDCl<sub>3</sub>) δ<sub>C</sub>: 1919.2, 135.8, 132.2, 131.2, 130.9, 129.7, 129.0, 128.8, 127.8, 127.0, 124.1, 30.9; IR: ν<sub>max</sub> (ATR, cm<sup>-1</sup>) 2442, 2159, 2026, 1976, 1689, 1384, 1158, 1029, 853, 810, 678, 514.

### **2-Bromo-1-(4-nitrophenyl)ethanone (16c)**<sup>22</sup>

2.018 g, 8.24 mmol, >98%, white solid; Mp: 91–93 °C; <sup>1</sup>H NMR: (400 MHz, CDCl<sub>3</sub>) δ<sub>H</sub>: 8.31 (d, 2H, *J* = 8.4 Hz), 8.13 (d, 2H, *J* = 8.4 Hz), 4.45 (s, 2H); <sup>13</sup>C NMR: (100 MHz, CDCl<sub>3</sub>) δ<sub>C</sub>: 189.9, 150.6, 138.3, 130.0, 124.0, 30.2; IR: ν<sub>max</sub> (ATR, cm<sup>-1</sup>) 3109, 2446, 2160, 2031, 1977, 1699, 1515, 1341, 1191, 998, 841, 744, 480.

#### Wittig ylide formation from the corresponding bromides

Triphenyl phosphine (1.00 g, 3.81 mmol) was dissolved in THF (5 mL). To this mixture was added α-bromoacetophenones **16** (3.81 mmol), respectively, in five portions. The mixture was stirred at room temperature overnight. The resulting white precipitate was collected by filtration, washed with *n*-hexane (5 × 5 mL) and dried under reduced pressure. The dried white solid was dissolved in MeOH (20 mL). To this solution was added KOH (2.14 g, 38.1 mmol) dissolved in H<sub>2</sub>O (20 mL) in a dropwise fashion. The mixture was allowed to stir at room temperature for 2 hours. The MeOH was removed under reduced pressure and the crude reaction mixture extracted with Et<sub>2</sub>O (3 × 10 mL). The combined organic layers were washed with water (3 × 10 mL) and dried over magnesium sulphate. The solvent was removed under reduced pressure to afford the ylide, which was purified by re-crystallisation from hot ethanol.

#### **1-Phenyl-2-(triphenylphosphoranylidene)ethanone (17a)<sup>23</sup>**

1.248 g, 3.28 mmol, 86%, white solid; Mp: 175–178 °C; <sup>1</sup>H NMR: (400 MHz, CDCl<sub>3</sub>) δ<sub>H</sub>: 7.99–7.94 (m, 2H), 7.70 (dd, 6H, *J* = 12.2, 7.8 Hz), 7.55–7.52 (m, 3H), 7.46–7.45 (m, 6H), 7.40–7.30 (m, 3H), 4.41 (d, 1H, *J* = 24.4 Hz); <sup>13</sup>C NMR: (100 MHz, CDCl<sub>3</sub>) δ<sub>C</sub>: 184.7, 141.1 (d, *J* = 13.0 Hz), 133.0 (d, *J* = 10.1 Hz), 132.0, 129.3, 128.8 (d, *J* = 12.2 Hz), 127.6, 127.4, 126.8, 126.4, 50.6 (d, *J* = 111.0 Hz); <sup>31</sup>P NMR: (160 MHz, CDCl<sub>3</sub>) δ<sub>P</sub>: 16.96; IR: ν<sub>max</sub> (ATR,



cm<sup>-1</sup>) 3049, 2505, 2160, 2028, 1976, 1587, 1513, 1436, 1385, 1104, 873, 747, 710, 689, 461;  
EIMS (*m/z*): 380 ([M]<sup>+</sup>, 85%), 379 (100%), 303 (100%), 277 (60%), 202 (40%), 183 (70%);  
ESI-HRMS: Calculated for [M]<sup>+</sup> C<sub>26</sub>H<sub>21</sub>OP, 380.1330; found 380.1314.

### **1-(2-Naphthalenyl)-2-(triphenylphosphoranylidene)ethanone (17b)<sup>24</sup>**

1.068 g, 2.48 mmol, 65%, yellow solid; Mp: 186–189 °C; <sup>1</sup>H NMR: (400 MHz, CDCl<sub>3</sub>) δ<sub>H</sub>: 8.50 (s, 1H), 8.06 (d, 1H, *J* = 8.4 Hz), 7.88–7.72 (m, 9H), 7.69–7.45 (m, 11H), 4.57 (d, 1H, *J* = 24.4 Hz); <sup>13</sup>C NMR: (100 MHz, CDCl<sub>3</sub>) δ<sub>C</sub>: 184.6, 138.5 (d, *J* = 14.5 Hz) 134.1, 133.2 (d, *J* = 10.1 Hz), 133.0, 132.1, 128.9 (d, *J* = 12.3 Hz), 127.4, 127.1, 126.5, 126.2, 125.7, 124.9, 51.6, (d, *J* = 111.0 Hz); <sup>31</sup>P NMR: (160 MHz, CDCl<sub>3</sub>) δ<sub>P</sub>: 17.02; IR: ν<sub>max</sub> (ATR, cm<sup>-1</sup>) 3050, 2504, 2159, 2028, 2977, 1520, 2435, 1395, 1105, 873, 757, 691, 435; EIMS (*m/z*): 430 ([M]<sup>+</sup>, 95%), 429 (100%), 401 (25%), 303 (90%), 277 (65%), 183 (55%); ESI-HRMS: Calculated for [M]<sup>+</sup> C<sub>30</sub>H<sub>23</sub>OP, 430.1487; found, 430.1484.

### **1-(4-Nitrophenyl)-2-(triphenylphosphoranylidene)ethanone (17c)<sup>24</sup>**

1.004 g, 2.36 mmol, 62%, yellow solid; Mp: 161–162 °C; <sup>1</sup>H NMR: (300 MHz, CDCl<sub>3</sub>) δ<sub>H</sub>: 8.16 (d, 2H, *J* = 11.6 Hz), 8.05 (d, 2H, *J* = 12.0 Hz), 7.72–7.65 (m, 6H), 7.60–7.55 (m, 3H), 7.51–7.45 (m, 6H), 4.49 (d, 1H, *J* = 30.4 Hz); <sup>13</sup>C NMR: (100 MHz, CDCl<sub>3</sub>) δ<sub>C</sub>: 181.8, 148.2, 147.1 (d, *J* = 15.0 Hz), 133.1 (d, *J* = 10.2 Hz), 132.0, 129.0 (d, *J* = 12.2 Hz), 127.7, 126.6, 125.6, 123.1, 53.7 (d, *J* = 109.0 Hz); <sup>31</sup>P NMR: (160 MHz, CDCl<sub>3</sub>) δ<sub>P</sub>: 17.02; IR: ν<sub>max</sub> (ATR, cm<sup>-1</sup>) 3065, 2442, 2159, 2031, 1976, 1525, 1436, 1407, 1339, 1103, 863, 715, 692, 512; EIMS (*m/z*): 425 ([M]<sup>+</sup>, 60%), 424 (100%), 303 (75%), 277 (65%), 183 (65%); ESI-HRMS: Calculated for [M]<sup>+</sup> C<sub>26</sub>H<sub>20</sub>NO<sub>3</sub>P, 425.1181; found, 425.1174.

### General procedure for the synthesis of 2-hydroxychalcones via the Wittig reaction

The Wittig reagents **17** (2.62 mmol) were respectively dissolved in toluene (10 mL) in a two necked flask equipped with a reflux condenser. To this solution was added salicylaldehyde (0.321 g, 2.63 mmol) dissolved in toluene (5 mL) and the reaction mixture was stirred under reflux for 1 hour. The toluene was removed under reduced pressure and the residue purified by flash silica column chromatography (4:1 hexane/EtOAc).

#### **(E)-3-(2-Hydroxyphenyl)-1-phenylprop-2-en-1-one (18a)<sup>25</sup>**

577 mg, 2.57 mmol, 98%, yellow solid; Mp: 152–154 °C; TLC: 0.24 (4:1 hexane/EtOAc); <sup>1</sup>H NMR: (400 MHz, CDCl<sub>3</sub>) δ<sub>H</sub>: 8.13 (d, 1H, *J* = 16.0 Hz), 8.02 (d, 2H, *J* = 7.6 Hz), 7.69 (d, 1H, *J* = 16.0 Hz), 7.59–7.47 (m, 4H), 7.26 (t, 1H, *J* = 8.0 Hz), 6.95 (t, 1H, *J* = 7.4 Hz), 6.90 (d, 1H, *J* = 8.4 Hz), 6.35 (br s, 1H); <sup>13</sup>C NMR: (100 MHz, CDCl<sub>3</sub>) δ<sub>C</sub>: 191.8, 155.7, 140.8, 138.3, 132.7, 131.8, 129.6, 128.6, 122.9, 122.2, 121.0, 116.6; IR: ν<sub>max</sub> (ATR, cm<sup>-1</sup>) 3185, 2504, 2159, 2028, 1976, 1638, 1560, 1455, 1344, 1229, 1022, 731, 513, 471; EIMS (*m/z*): 224 ([M]<sup>+</sup>, 15%), 208 (35%), 207 (100%), 178 (55%), 147 (20%), 105 (25%), 77 (25%); ESI-HRMS: Calculated for [M]<sup>+</sup> C<sub>15</sub>H<sub>12</sub>O<sub>2</sub>, 224.0837; found, 224.0832.

#### **(E)-3-(2-Hydroxyphenyl)-1-(naphthalen-2-yl)prop-2-en-1-one (18b)<sup>26</sup>**

546 mg, 1.99 mmol, 76%, yellow solid; Mp: 156–159 °C; TLC: 0.48 (2:1 hexane/EtOAc); <sup>1</sup>H NMR: (400 MHz, DMSO) δ<sub>H</sub>: 10.17 (s, 1H), 8.85 (s, 1H), 8.11–7.92 (m, 5H), 7.65 (t, 2H, *J* = 8.4 Hz), 7.28 (t, 1H, *J* = 7.6 Hz), 6.95 (d, 1H, *J* = 8.0 Hz), 6.80 (t, 1H, *J* = 7.6 Hz); <sup>13</sup>C NMR: (100 MHz, DMSO) δ<sub>C</sub>: 189.15, 157.2, 139.3, 135.2, 134.9, 132.3, 132.1, 130.1, 129.6, 128.6,

128.5, 128.4, 127.7, 126.9, 124.2, 121.4, 120.8, 119.4, 116.2; IR:  $\nu_{\max}$  (ATR,  $\text{cm}^{-1}$ ) 3184, 2522, 2159, 2030, 1976, 1645, 1585, 1458, 1333, 1187, 986, 826, 746, 586, 431; EIMS ( $m/z$ ): 274 ( $[\text{M}]^+$ , 10%), 258 (30%), 257 (100%), 228 (20%), 155 (15%), 127 (20%); ESI-HRMS: Calculated for  $[\text{M}]^+ \text{C}_{19}\text{H}_{14}\text{O}_2$ , 274.0994; found, 274.0988.

**(E)-3-(2-Hydroxyphenyl)-1-(4-nitrophenyl)-2-propen-1-one (18c)<sup>27</sup>**

303 mg, 1.13 mmol, 43%, yellow solid; Mp: 195–200 °C; TLC: 0.61 (2:1 hexane/EtOAc); <sup>1</sup>H NMR: (400 MHz, DMSO)  $\delta_{\text{H}}$ : 10.40 (s, 1H), 8.34 (d, 2H,  $J = 8.4$  Hz), 8.27 (d, 2H,  $J = 8.4$  Hz), 8.07 (d, 1H,  $J = 15.6$  Hz), 7.85 (d, 1H,  $J = 5.2$  Hz), 7.83 (d, 1H,  $J = 15.6$  Hz), 7.28 (t, 1H,  $J = 7.4$  Hz), 6.96 (d, 1H,  $J = 8.0$  Hz), 6.87 (t, 1H,  $J = 7.2$  Hz); <sup>13</sup>C NMR: (100 MHz, DMSO)  $\delta_{\text{C}}$ : 188.6, 157.6, 149.6, 142.7, 141.1, 132.5, 129.6, 128.9, 128.8, 123.8, 121.0, 120.6, 119.4, 116.3; IR:  $\nu_{\max}$  (ATR,  $\text{cm}^{-1}$ ) 3462, 3333, 2447, 2160, 2029, 1976, 1673, 1651, 1572, 1518, 1339, 1214, 1033, 848, 755, 426; EIMS ( $m/z$ ): 269 ( $[\text{M}]^+$ , 25%), 252 (95%), 206 (50%), 150 (40%), 147 (50%), 119 (45%); ESI-HRMS: Calculated for  $[\text{M}]^+ \text{C}_{15}\text{H}_{11}\text{O}_4\text{N}$ , 269.0688; found, 269.0681.

General procedure for the sodium borohydride reduction of 2-hydroxychalcones

Compounds **18** (4.46 mmol) were respectively dissolved in MeOH (10 mL) and the mixture cooled to 0 °C. To this solution was added NaBH<sub>4</sub> (0.675 g, 17.8 mmol) in six portions. The resultant mixture was allowed to warm to room temperature and stirred for 1 hour. The reaction was quenched by the addition of 1 M HCl (10 mL), the mixture extracted with Et<sub>2</sub>O (3 × 5 mL) and the combined organic layers washed with water (2 × 5 mL) and dried with magnesium sulphate. The solvent was removed under reduced pressure and the residue purified by flash silica column chromatography (2:1 hexane/EtOAc).

**(E)-2-(1-Hydroxy-1-phenylprop-2-en-3-yl)phenol (10a)**<sup>28</sup>

727 mg, 3.21 mmol, 72%, white solid; Mp: 102–105 °C; TLC: 0.31 (2:1 hexane/EtOAc); <sup>1</sup>H NMR: (400 MHz, DMSO) δ<sub>H</sub>: 9.58 (s, 1H), 7.39 (d, 2H, *J* = 7.2 Hz), 7.35–7.30 (m, 3H), 7.22 (t, 1H, *J* = 7.2 Hz), 7.25 (t, 1H, *J* = 8.4 Hz), 6.83 (d, 1H, *J* = 16.0 Hz), 6.86–6.81 (m, 1H), 6.73 (t, 1H, *J* = 7.4 Hz), 6.53 (dd, 1H, *J* = 16.0, 6.4 Hz), 5.55 (d, 1H, *J* = 4.4 Hz), 5.22 (t, 1H, *J* = 5.6 Hz); <sup>13</sup>C NMR: (100 MHz, DMSO) δ<sub>C</sub>: 154.7, 144.8, 133.0, 128.2, 128.1, 126.7, 126.6, 126.2, 123.6, 123.3, 119.1, 115.7, 73.8; IR: ν<sub>max</sub> (ATR, cm<sup>-1</sup>) 2922, 2441, 2159, 2030, 1976, 1731, 1599, 1487, 1450, 1022, 751, 697, 414; EIMS (*m/z*): 223 ([M-3H]<sup>+</sup>, 20%), 222 (45%), 221 (30%), 208 (70%), 207 (100%), 105 (95%), 77 (60%); ESI-HRMS: Calculated for [M]<sup>+</sup> C<sub>15</sub>H<sub>14</sub>O<sub>2</sub>, 226.0994; found, 226.0981.

**(E)-2-(1-Hydroxy-1-(naphthalen-2-yl)prop-2-en-3-yl)phenol (10b)**<sup>29</sup>

776 mg, 2.81 mmol, 63%, off white solid; Mp: 103–105 °C; TLC: 0.43 (3:1 hexane/EtOAc); <sup>1</sup>H NMR: (300 MHz, DMSO) δ<sub>H</sub>: 9.61 (s, 1H), 7.91–7.87 (m, 4H), 7.56 (dd, 1H, *J* = 11.2, 2.0 Hz), 7.52–7.44 (m2H), 7.37 (dd, 1H, 10.4, 2.0 Hz), 7.04 (dt, 1H, *J* = 14.1, 4.8 Hz), 6.93 (d, 1H, *J* = 21.2 Hz), 6.84 (d, 1H, *J* = 11.2 Hz), 6.74 (t, 1H, *J* = 10.2 Hz), 6.44 (dd, 1H, *J* = 21.2, 8.8 Hz), 5.72 (d, 1H, *J* = 5.6 Hz), 5.41 (t, 1H, *J* = 6.8 Hz); <sup>13</sup>C NMR: (75 MHz, DMSO) δ<sub>C</sub>: 154.7, 142.3, 132.9, 132.8, 132.2, 128.3, 127.8, 127.6, 127.5, 126.7, 126.0, 125.6, 125.1, 124.2, 123.9, 123.4, 119.1, 115.7, 73.9; IR: ν<sub>max</sub> (ATR, cm<sup>-1</sup>) 3343, 3051, 2556, 2159, 2030, 1976, 1453, 1246, 1089, 818, 753, 455; EIMS (*m/z*): 276 ([M]<sup>+</sup>, 5%), 260 (100%), 258 (50%), 257 (40%), 154 (30%); ESI-HRMS: Calculated for [M]<sup>+</sup> C<sub>19</sub>H<sub>16</sub>O<sub>2</sub>, 276.1150; found, 276.1142.

**(E)-2-(1-Hydroxy-1-(4-nitrophenyl)prop-2-en-3-yl)phenol (10c)**

956 mg, 3.52 mmol, 79%, red solid; Mp: 139–142 °C; TLC: 0.44 (2:1 hexane/EtOAc); <sup>1</sup>H NMR: (300 MHz, DMSO) δ<sub>H</sub>: 9.65 (s, 1H), 8.21 (d, 2H, *J* = 11.6 Hz), 7.67 (d, 2H, *J* = 11.2 Hz), 7.35 (dd, 1H, *J* = 10.2, 2.2 Hz), 7.05 (t, 1H, *J* = 9.2 Hz), 6.90 (d, 1H, *J* = 21.1 Hz), 6.82 (dd, 1H, *J* = 10.8, 1.6 Hz), 6.73 (t, 1H, *J* = 10.6 Hz), 6.33 (dd, 1H, *J* = 21.1, 9.0 Hz), 5.92 (d, 1H, *J* = 4.8 Hz), 5.39 (d, 1H, *J* = 6.0 Hz); <sup>13</sup>C NMR: (75 MHz, DMSO) δ<sub>C</sub>: 154.8, 152.6, 146.4, 131.7, 128.6, 127.2, 126.9, 124.9, 123.5, 123.0, 119.2, 115.7, 73.1; IR: ν<sub>max</sub> (ATR, cm<sup>-1</sup>) 2159, 2031, 1516, 1454, 1343, 855, 752, 699, 474; EI-HRMS: Calculated for [M]<sup>+</sup> C<sub>15</sub>H<sub>13</sub>NO<sub>4</sub>, 271.0845; found, 271.0832.

**(E)-2-(1-Hydroxy-3-phenylprop-2-en-1-yl)phenol (12)<sup>29</sup>**

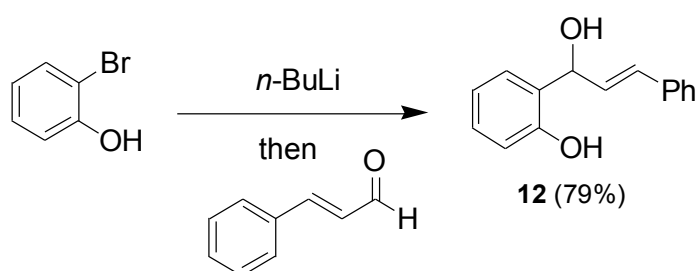

**Scheme S2.** Synthesis of **12**, an isomer of **10a**.

To an oven-dried two necked reaction flask were added anhydrous THF (5 mL) and *n*-BuLi (2.31 mmol, 0.9 M) at 0 °C, after which 2-bromophenol (0.200 g, 1.16 mmol) dissolved in THF (2 mL) was added. The mixture was allowed to warm to room temperature and stirred for 2 hours after which it was cooled to -78 °C. To the solution was added *trans*-cinnamaldehyde (0.146 mL, 1.16 mmol) dissolved in THF (5 mL) and the mixture was allowed to warm to 0 °C and stirred for 1 hour. The reaction was quenched by the addition of

saturated aqueous  $\text{NH}_4\text{Cl}$  (10 mL). The reaction mixture was diluted with  $\text{Et}_2\text{O}$  (10 mL) and the organic layer washed with water ( $2 \times 5$  mL) and dried with magnesium sulphate. The organic solvent was removed under reduced pressure and the resulting residue purified by flash silica column chromatography (4:1 hexane/EtOAc).

207 mg, 0.916 mmol, 79%, yellow oil; TLC: 0.37 (4:1 hexane/EtOAc);  $^1\text{H}$  NMR: (300 MHz, DMSO)  $\delta_{\text{H}}$ : 9.43 (br s, 1H), 7.38 (d, 2H,  $J = 7.2$  Hz), 7.29 (t, 2H,  $J = 7.2$  Hz), 7.20 (d, 1H,  $J = 7.2$  Hz), 7.22–7.17 (m, 1H), 7.06 (t, 1H,  $J = 7.5$  Hz), 6.82–6.80 (m, 2H), 6.59 (d, 1H,  $J = 16.1$  Hz), 6.40 (dd, 1H,  $J = 16.1, 5.0$  Hz), 5.57 (d, 1H,  $J = 5.0$  Hz);  $^{13}\text{C}$  NMR: (75 MHz, DMSO)  $\delta_{\text{C}}$ : 153.9, 136.9, 133.0, 130.3, 128.6, 127.6, 127.2, 126.8, 126.2, 119.0, 115.0, 67.5; IR:  $\nu_{\text{max}}$  (ATR,  $\text{cm}^{-1}$ ) 3028, 1732, 1603, 1485, 1452, 1226, 1202, 750, 696, 409; EI-HRMS: Calculated for  $[\text{M}]^+ \text{C}_{15}\text{H}_{14}\text{O}_2$ , 226.0994; found, 226.0986.

#### General procedure for the cyclisation of “activated” diols

$\text{Al}(\text{OTf})_3$  (4 mg, 8.8  $\mu\text{mol}$ ) was dissolved in DCM (10 mL) and **10a** (0.200 g, 0.884 mmol) was added. The reaction mixture was allowed to stir at room temperature for 1 hour. The reaction was quenched with 5% aqueous sodium bicarbonate (5 mL). The aqueous portion was extracted with  $\text{Et}_2\text{O}$  ( $3 \times 5$  mL) and the combined organic layers washed with water ( $2 \times 5$  mL) and dried with magnesium sulphate. The volatile component was removed under reduced pressure and the residue purified by column chromatography (20:1 hexane/EtOAc).

#### **2-Phenyl-2H-chromene (11a)**<sup>28,30</sup>

155 mg, 0.743 mmol, 84%, yellow oil; TLC: 0.55 (20:1 hexane/EtOAc);  $^1\text{H}$  NMR: (300 MHz,  $\text{CDCl}_3$ )  $\delta_{\text{H}}$ : 7.46 (dd, 2H,  $J = 7.9, 1.7$  Hz), 7.40–7.32 (m, 3H), 7.11 (td, 1H,  $J = 10.6,$

1.8 Hz), 7.02 (dd, 1H,  $J = 10.7, 1.8$  Hz), 6.86 (td, 1H,  $J = 10.3, 1.8$  Hz), 6.79 (dd, 1H,  $J = 8.1, 1.7$  Hz), 6.53 (dd, 1H,  $J = 9.9, 2.0$  Hz), 5.92 (dd, 1H,  $J = 3.4, 2.0$  Hz), 5.80 (dd, 1H,  $J = 9.9, 3.4$  Hz);  $^{13}\text{C}$  NMR: (75 MHz,  $\text{CDCl}_3$ )  $\delta_{\text{C}}$ : 153.1, 140.8, 129.4, 128.6, 128.3, 127.0, 126.6, 124.8, 124.0, 121.3, 121.1, 116.0, 77.1; IR:  $\nu_{\text{max}}$  (ATR,  $\text{cm}^{-1}$ ) 2921, 2442, 2159, 2029, 1976, 1449, 1259, 1014, 752, 697, 509; EIMS ( $m/z$ ): 208 ( $[\text{M}]^+$ , 65%), 207 (100%), 178 (30%), 131 (40%); ESI-HRMS: Calculated for  $[\text{M}]^+$   $\text{C}_{15}\text{H}_{12}\text{O}$ , 208.0888; found, 208.0882.

### **2-(Naphthalen-2-yl)-2H-chromene (11b)<sup>29,30</sup>**

146 mg, 0.566 mmol, 64%, white solid; Mp: 88–90 °C; TLC: 0.62 (20:1 hexane/EtOAc);  $^1\text{H}$  NMR: (300 MHz,  $\text{CDCl}_3$ )  $\delta_{\text{H}}$ : 7.89–7.82 (m, 4H), 7.63 (dd, 1H,  $J = 8.2, 2.0$  Hz), 7.53–7.47 (m, 2H), 7.15 (td, 1H,  $J = 7.9, 1.7$  Hz), 7.06 (dd, 1H,  $J = 7.5, 1.6$  Hz), 6.90 (td, 1H,  $J = 7.5, 1.3$  Hz), 6.85 (dd, 1H,  $J = 8.1, 1.4$  Hz), 6.60 (dd, 1H,  $J = 9.9, 1.6$  Hz), 6.11 (dd, 1H,  $J = 3.2, 1.6$  Hz), 5.89 (dd, 1H,  $J = 9.9, 3.2$  Hz);  $^{13}\text{C}$  NMR: (75 MHz,  $\text{CDCl}_3$ )  $\delta_{\text{C}}$ : 153.2, 138.0, 133.3, 133.2, 129.5, 128.6, 128.2, 127.7, 126.6, 126.2, 126.0, 124.9, 124.7, 124.2, 121.3, 121.2, 116.0, 77.2; IR:  $\nu_{\text{max}}$  (ATR,  $\text{cm}^{-1}$ ) 3054, 2159, 2031, 1601, 1483, 1230, 1108, 798, 740, 410; EIMS ( $m/z$ ): 258 ( $[\text{M}]^+$ , 100%), 257 (95%), 131 (25%); ESI-HRMS: Calculated for  $[\text{M}]^+$   $\text{C}_{19}\text{H}_{14}\text{O}$ , 258.1045; found, 258.1040.

### **2-(4-Nitrophenyl)-2H-chromene (11c)**

128 mg, 0.504 mmol, 57%, yellow oil; TLC: 0.60 (20:1 hexane/EtOAc);  $^1\text{H}$  NMR: (300 MHz,  $\text{CDCl}_3$ )  $\delta_{\text{H}}$ : 8.20 (d, 2H,  $J = 10.2$  Hz), 7.60 (d, 2H,  $J = 10.1$  Hz), 7.13 (td, 1H,  $J = 10.3, 2.2$  Hz), 7.01 (dd, 1H,  $J = 9.8, 2.2$  Hz), 6.88 (td, 1H,  $J = 10.2, 2.0$  Hz), 6.81 (dd, 1H,  $J = 10.3, 1.8$  Hz), 6.56 (dd, 1H,  $J = 10.0, 2.0$  Hz), 5.99 (dd, 1H,  $J = 4.8, 2.0$  Hz), 5.78 (dd, 1H,  $J = 10.0, 4.8$  Hz);  $^{13}\text{C}$  NMR: (75 MHz,  $\text{CDCl}_3$ )  $\delta_{\text{C}}$ : 152.6, 147.9, 129.9, 127.5, 126.9, 125.0,

123.9, 123.3, 121.8, 121.0, 116.0, 75.7; IR:  $\nu_{\text{max}}$  (ATR,  $\text{cm}^{-1}$ ) 2923, 2156, 2030, 1605, 1518, 1344, 1012, 853, 753, 509; EIMS ( $m/z$ ): 253 ( $[\text{M}]^+$ , 10%), 252 (10%), 218 (20%), 207 (10%), 178 (10%), 130 (30%), 68 (100%); ESI-HRMS: Calculated for  $[\text{M}]^+$   $\text{C}_{15}\text{H}_{11}\text{NO}_3$ , 253.0739; found, 253.0708.

### *N*-(2-(Hydroxyphenyl)-4-methylbenzenesulphonamide (19)<sup>31</sup>

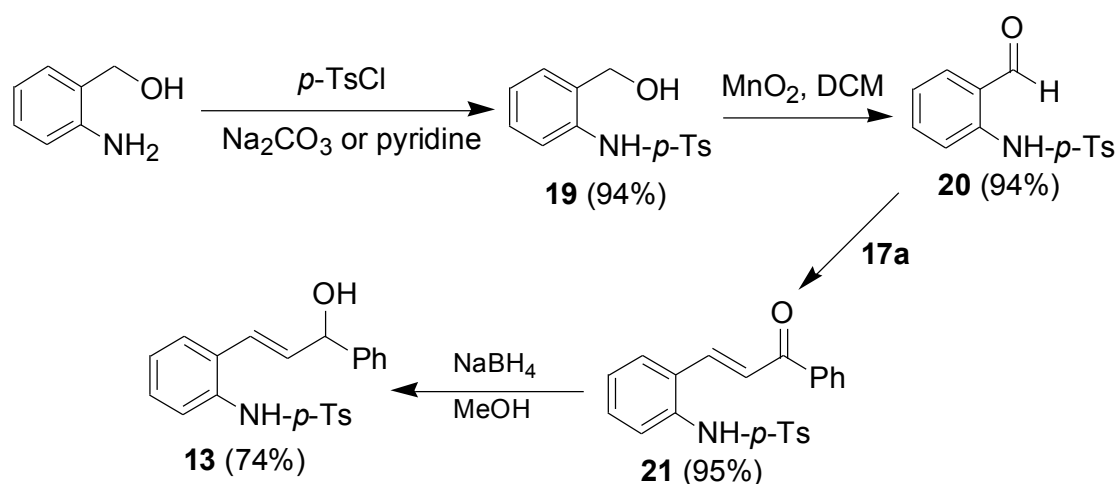

**Scheme S3.** Synthesis of benzenesulphonamide **13**.

2-Aminobenzylalcohol (0.200 g, 1.62 mmol) was dissolved in  $\text{Et}_2\text{O}$  (5 mL) and  $\text{Na}_2\text{CO}_3$  (0.190 g, 1.78 mmol) was added. To the mixture was added *p*-tosylchloride (0.340 g, 1.78 mmol) and the reaction mixture was then heated to reflux temperature for 12 hours.

Alternatively, 2-aminobenzylalcohol (0.200 g, 1.62 mmol) was dissolved in  $\text{Et}_2\text{O}$  (10 mL) and pyridine (0.78 mL, 9.72 mmol) was added, after which *p*-tosylchloride (0.340 g, 1.78 mmol) was added. The reaction mixture was then heated under reflux for 3 hours.

After the elapsed time the reaction mixture was diluted with  $\text{Et}_2\text{O}$  (10 mL) and washed with  $\text{H}_2\text{O}$  (10 mL) then with 1 M HCl (10 mL). The organic layer was extracted with 1 M NaOH



(4 × 10 mL). The basic aqueous extractions were combined, cooled to 0 °C and neutralised with concentrated HCl. The white precipitate was filtered off and dried under reduced pressure, and required no further purification.

578 mg, 1.52 mmol, 94%, white solid; Mp: 144–146 °C; <sup>1</sup>H NMR: (300 MHz, CDCl<sub>3</sub>) δ<sub>H</sub>: 7.88 (br s, 1H), 7.62 (d, 2H, *J* = 8.4 Hz), 7.40 (d, 1H, *J* = 8.1 Hz), 7.24 (t, 1H, *J* = 4.3 Hz), 7.19 (d, 2H, *J* = 8.1 Hz), 7.07–7.05 (m, 2H), 4.37 (s, 2H), 2.36 (s, 3H); <sup>13</sup>C NMR: (75 MHz, CDCl<sub>3</sub>) δ<sub>C</sub>: 143.8, 136.9, 136.4, 131.6, 129.6, 129.2, 129.0, 127.0, 125.3, 123.4, 63.9, 21.5; IR: ν<sub>max</sub> (ATR, cm<sup>-1</sup>) 3430, 2506, 2027, 1977, 1412, 1315, 1150, 1031, 928, 761, 547, 470; ESI-HRMS: Calculated for [M]<sup>+</sup> C<sub>14</sub>H<sub>16</sub>O<sub>3</sub>S, 278.0851; found, 278.0850.

#### ***N*-(2-(Formylphenyl)-4-methylbenzenesulphonamide (20)<sup>32</sup>**

Benzylalcohol **19** (1.20 g, 4.35 mmol) was dissolved in DCM (10 mL) and MnO<sub>2</sub> (1.51 g, 17.4 mmol) was added. The reaction mixture was stirred under reflux for 12 hours. After the elapsed reaction time the solids were filtered off and the volatile component removed under reduced pressure. The residue was purified by flash silica column chromatography.

861 mg, 3.13 mmol, 72%, yellow solid; Mp: 131–133 °C; TLC: 0.51 (2:1 hexane/EtOAc); <sup>1</sup>H NMR: (300 MHz, CDCl<sub>3</sub>) δ<sub>H</sub> : 10.8 (br s, 1H, NHTs), 9.79 (s, 1H), 7.74 (d, 2H, *J* = 8.4 Hz), 7.64 (d, 1H, *J* = 8.1 Hz), 7.56 (dd, 1H, *J* = 7.7, 1.4 Hz), 7.47 (dt, 1H, *J* = 8.1, 1.0 Hz), 7.20 (d, 2H, *J* = 8.4 Hz), 7.13 (dt, 1H, *J* = 7.6, 1.1 Hz), 2.33 (s, 3H); <sup>13</sup>C NMR: (75 MHz, CDCl<sub>3</sub>) δ<sub>C</sub> : 195.0, 144.2, 139.8, 136.2, 136.1, 135.7, 129.7, 127.2, 122.9, 121.7, 117.6, 21.4; IR: ν<sub>max</sub> (ATR, cm<sup>-1</sup>) 3115, 2513, 2160, 2030, 1976, 1662, 1581, 1493, 1455, 1337, 1154, 929, 812, 758, 659, 543, 452; EIMS (*m/z*): 275 ([M]<sup>+</sup>, 50%), 218 (20%), 120 (100%), 119 (40%); ESI-HRMS: Calculated for [M]<sup>+</sup> C<sub>14</sub>H<sub>13</sub>NO<sub>3</sub>S, 275.0616; found, 275.0568.

**(E)-4-Methyl-N-(2-(3-oxo-3-phenylprop-1-enyl)phenyl)benzenesulphonamide (21)**<sup>33</sup>

**20** (0.501 g, 1.82 mmol) was dissolved in toluene (10 mL) in a two necked flask equipped with a reflux condenser. To this was added **17a** (0.692 g, 1.82 mmol) dissolved in toluene (5 mL). The reaction mixture was stirred under reflux for 1 hour. The toluene was removed under reduced pressure and the residue purified by flash silica column chromatography.

652 mg, 1.73 mmol, 95%, yellow solid; Mp: 175–177 °C; TLC: 0.46 (2:1 hexane/EtOAc); <sup>1</sup>H NMR: (300 MHz, CDCl<sub>3</sub>) δ<sub>H</sub> : 7.84 (d, 2H, *J* = 7.2 Hz), 7.59 (d, 1H, *J* = 15.6 Hz), 7.50–7.40 (m, 3H), 7.44 (d, 2H, *J* = 8.4 Hz), 7.37 (d, 2H, *J* = 7.6 Hz), 7.28 (dt, 1H, *J* = 10.7, 3.9 Hz), 7.14–7.19 (m, 2H), 7.09 (d, 1H, *J* = 15.6 Hz), 7.00 (d, 2H), 2.03 (s, 3H); <sup>13</sup>C NMR: (75 MHz, CDCl<sub>3</sub>) δ<sub>C</sub> : 190.0, 143.9, 139.0, 137.6, 135.8, 135.3, 133.1, 131.1, 130.9, 129.7, 129.7, 128.7, 128.6, 127.7, 127.2, 127.2, 124.3; IR: ν<sub>max</sub> (ATR, cm<sup>-1</sup>) 3181, 2501, 2159, 2030, 1976, 1592, 1456, 1341, 1156, 1019, 755, 682, 450; ESI-HRMS: Calculated for [M]<sup>+</sup> C<sub>22</sub>H<sub>20</sub>NO<sub>3</sub>S, 378.1164; found, 378.1156.

**(E)-N-(2-(3-Hydroxy-3-phenylprop-1-enyl)phenyl)-4-methylbenzenesulphonamide (13)**<sup>34</sup>

Reduction of **21** (650 mg, 1.33 mmol) was carried out in a fashion similar to the reduction of compounds **18** to form compounds **10**.

373 mg, 0.984 mmol, 74%, white solid; Mp: 146–148 °C; TLC: 0.34 (2:1 hexane/EtOAc); <sup>1</sup>H NMR: (300 MHz, DMSO) δ<sub>H</sub> : 9.69 (br s, 1H), 7.54 (d, 2H, *J* = 8.1 Hz), 7.49 (d, 1H, *J* = 4.8 Hz), 7.35–7.25 (m, 5H), 7.30 (d, 2H, *J* = 7.8 Hz), 7.13–7.11 (m, 2H), 6.93–6.92 (m, 1H), 6.82 (d, 1H, *J* = 15.9 Hz), 6.19 (dd, 1H, *J* = 15.9, 6.6 Hz), 5.56 (d, 1H, *J* = 4.2 Hz), 5.11 (dd, 1H, *J* = 6.6, 4.2 Hz), 2.33 (s, 3H); <sup>13</sup>C NMR: (75 MHz, DMSO) δ<sub>C</sub> : 144.4, 143.0, 137.4, 134.6, 133.7, 133.4, 129.6, 128.1, 127.7, 127.0, 126.9, 126.7, 126.3, 125.9, 123.8, 73.6, 21.0; IR: ν<sub>max</sub> (ATR, cm<sup>-1</sup>) 3266, 2488, 2159, 2028, 1976, 1486, 1394, 1326, 1155, 1090, 765, 671,

514; EIMS (*m/z*): 361 (10%), 284 (20%), 206 (90%), 205 (80%), 204 (60%), 155 (30%), 128 (60%), 101 (20%), 91 (100%), 77 (50%); ESI-HRMS: Calculated for [M]<sup>+</sup> C<sub>22</sub>H<sub>21</sub>NO<sub>3</sub>S, 379.1242; found, 379.1236.

### **2-Phenyl-1-*p*-tosyl-1,2-dihydroquinoline (14)**<sup>34</sup>

To Al(OTf)<sub>3</sub> (8 mg, 15.8 μmol) dissolved in DCM (10 mL) was added **13** (0.6 g, 1.58 mmol). The reaction mixture was allowed to stir at reflux temperature for 1 hour after which the reaction was quenched by the addition of aqueous sodium bicarbonate (5 mL). The aqueous portion was extracted with Et<sub>2</sub>O (3 x 5 mL) and the combined organic layers washed with water (2 x 5 mL) and dried with magnesium sulphate. The solvent was removed under reduced pressure and the resulting residue purified by flash silica column chromatography (2:1 hexane/EtOAc).

491 mg, 1.36 mmol, 86%, white solid; Mp: 123–126 °C; TLC: 0.69 (2:1 hexane/EtOAc); <sup>1</sup>H NMR: (300 MHz, CDCl<sub>3</sub>) δ<sub>H</sub>: 7.65 (d, 1H, *J* = 7.8 Hz), 7.35–7.32 (m, 4H), 7.23–7.06 (m, 5H), 7.08 (t, 2H, *J* = 8.4 Hz), 6.96 (d, 1H, *J* = 7.9 Hz), 6.27 (d, 1H, *J* = 9.5 Hz), 6.03 (d, 1H, *J* = 5.9 Hz), 5.88 (dd, 1H, *J* = 9.5, 5.9 Hz), 2.33 (s, 3H); <sup>13</sup>C NMR: (75 MHz, CDCl<sub>3</sub>) δ<sub>C</sub>: 143.4, 138.3, 136.0, 132.8, 129.0, 128.6, 128.3, 128.1, 127.8, 127.5, 127.3, 127.1, 126.4, 126.2, 125.4, 56.8, 21.4; IR: ν<sub>max</sub> (ATR, cm<sup>-1</sup>) 2160, 2031, 1451, 1334, 1154, 811, 775, 690, 655, 575, 471; EIMS (*m/z*): 361 (M, 20%), 206 (100%), 205 (40%), 155 (30%), 128 (30%); ESI-HRMS: Calculated for [M]<sup>+</sup> C<sub>22</sub>H<sub>19</sub>NO<sub>2</sub>S, 361.1136; found, 361.1154.

## Acknowledgement

We gratefully acknowledge Sasol Ltd (South Africa), NRF, THRIP, the University of Johannesburg and University of Technology Sydney for generous funding.

## References

1. Black, P. J.; Edwards, M. G.; Williams, J. M. J.; *Eur. J. Org. Chem.* **2006**, 4367–4378.
2. Katritzky, A. R.; Marquet, J.; Lloyd, J. M.; Keay, J. G.; *J. Chem. Soc. Perkin Trans. II* **1983**, 1435–1441.
3. Bikard, Y.; Mezaache, R.; Weibel, J. M.; Benkouider, A.; Sirlin, C.; Pale, P.; *Tetrahedron* **2008**, *64*, 10224–10232.
4. Howard, K. T.; Duffy, B. C.; Linaburg, M. R.; Chisholm, J. D.; *Org. Biomol. Chem.* **2016**, *14*, 1623–1628.
5. Zhu, A.; Li, L.; Wang, J.; Zhuo, K.; *Green Chem.* **2011**, *13*, 1244–1250.
6. Ranu, B.C.; Mandal, T.; *J. Org. Chem.* **2004**, *69*, 5793–5795.
7. This compound has been previously synthesised but has not been fully characterised (SciFinder Scholar search). Sharma, G. V. M.; Rajendra Prasad, T.; Mahalingam, A. K.; *Tetrahedron Lett.* **2001**, *42*, 759–761.
8. Liu, C.; Li, M.; Yang, C.; Tian, S.; *Chem. Eur. J.* **2009**, *15*, 793–797.
9. Li, H.; Li, W.; Liu, W.; He, Z.; Li, Z.; *Angew. Chem. Int. Ed.* **2011**, *50*, 2975–2978.
10. Kohling, P.; Schmidt, A. M.; Eilbracht, P.; *Org. Lett.* **2003**, *5*, 3213–3216.
11. Huang, H.; Kang, J.Y.; *Org. Lett.* **2017**, *19*, 544–547.
12. Chakraborti, A. K.; Chankeshwara, S. V.; *J. Org. Chem.* **2009**, *74*, 1367–1370.
13. Yoshida, K.; Narui, R.; Imamoto, T.; *Chem. Eur. J.* **2008**, *14*, 9706–9713.
14. Podder, S.; Roy, S.; *Tetrahedron* **2007**, *63*, 9146–9152.

15. Yang, H.; Fang, L.; Zhang, M.; Zhu, C.; *Eur. J. Org. Chem.* **2009**, 666–672.
16. Sasaki, M.; Higashi, M.; Masu, H.; Yamaguchi, K.; Takeda, K.; *Org. Lett.* **2005**, 7, 5913–5915.
17. Li, B.-S.; Yang, B.-M.; Wang, S.-H.; Zhang, Y.-Q.; Cao, X.-P.; Tu, Y.-Q.; *Chem. Sci.* **2012**, 3, 1975–1979.
18. This compound has been previously synthesised but has not been fully characterised (SciFinder Scholar search). Zaitsev, A. B.; Caldwell, H. F.; Pregosin, P. S.; Veiros, L. F.; *Chem. Eur. J.* **2009**, 15, 6468–6477.
19. This compound has been previously synthesised but has not been fully characterised (SciFinder Scholar search). Das, B.; Veeranjanyulu, B.; Krishnaiah, M.; Balasubramanyam, P.; *Synth Comm.* **2009**, 39, 1929–1935.
20. This compound has been previously synthesised but has not been fully characterised (SciFinder Scholar search). Qureshi, Z. S.; Desmukh, K. M.; Tambade, P. J.; Dhake, K. P.; Bhanage, B. M.; *Eur. J. Org. Chem.* **2010**, 6233–6238.
21. Xing, Y.; Zhang, M.; Ciccarelli, S.; Lee, J.; Catano, B.; *Eur. J. Org. Chem.* **2017**, 781–785.
22. Maji, T.; Karmakar, A.; Reiser, O.; *J. Org. Chem.* **2011**, 76, 736–739.
23. Babu, K. S.; Li, X.; Jacob, M. R.; Zhang, Q.; Khan, S. I.; Ferreira, D.; Clark, A. M.; *J. Med. Chem.* **2006**, 49, 7877–7886.
24. Marqués-López, E.; Herrera, R. P.; Marks, T.; Jacobs, W. C.; Könnig D.; Figueiredo, R. M.; Christmann, M.; *Org. Lett.* **2009**, 11, 4116–4119.
25. Yin, G.; Fan, L.; Ren, T.; Zheng, C.; Tao, Q.; Wu, A.; She, N.; *Org. Biomol. Chem.* **2012**, 10, 8877–8883.
26. This compound has been previously synthesised but has not been fully characterised (SciFinder Scholar search). a) Poudel, T. N.; Lee, Y. R.; *Org. Biomol. Chem.* **2014**, 12, 919–930; b) Rao, Y.; Li, Z.; Yin, G.; *Green Chem.* **2014**, 16, 2213–2218.

27. This compound has been previously synthesised but has not been fully characterised (SciFinder Scholar search). Manjunath, G.; Mahesh, M.; Bheemaraju, G.; Venkata Ramana, P.; *Chem. Sci. Trans.* **2016**, *5*, 61–74.
28. Compound **10a** has been previously synthesised but has not been fully characterised (SciFinder Scholar search). Kouhkan, M.; Zeynizadeh, B.; *Bull. Kor. Chem. Soc.* **2010**, *31*, 2961–2966.
29. For compound **11b**, see the following reference. Compounds **10b** and **12** have been previously synthesised but have not been fully characterised (SciFinder Scholar search). Compounds **11b** and **12** are both reported in Zeng, B.-S.; Yu, X.; Siu, P. W.; Scheidt K. A.; *Chem. Sci.* **2014**, *5*, 2277–2281.
30. Gil-Negrete, J.M.; Perez Sestelo, J.; Sarandeses, L.A.; *Org. Lett.* **2016**, *18*, 4316–4319.
31. Yar, M.; McGarrigle, E. M.; Aggarwal, V. K.; *Org. Lett.* **2009**, *11*, 257–260.
32. Hirano, K.; Biju, A. T.; Piel, I.; Glorius, F.; *J. Am. Chem. Soc.* **2009**, *131*, 14190–14191.
33. Kothandaraman, P.; Foo, S. J.; Chan, P. W. H.; *J. Org. Chem.* **2009**, *74*, 5947–5952.
34. Lee, Y.-T.; Jang, Y.-J.; Syu, S.-e; Chou, S.-C.; Lee, C.-J.; Lin, W.; *Chem. Commun.* **2012**, *48*, 8135–8137.

|                                                  |                    |
|--------------------------------------------------|--------------------|
| <b>Formula</b> C <sub>16</sub> H <sub>18</sub> O | <b>FW</b> 226.3135 |
|--------------------------------------------------|--------------------|

|                                                                    |                               |                                 |                                                   |
|--------------------------------------------------------------------|-------------------------------|---------------------------------|---------------------------------------------------|
| <b>Acquisition Time (sec)</b> 2.0000                               | <b>Comment</b> CC2-1H         | <b>Date</b> Aug 8 2008          | <b>Date Stamp</b> Aug 8 2008                      |
| <b>File Name</b> C:\Users\User\Desktop\adam\CCclean\CC2-1H.fid\fid | <b>Frequency (MHz)</b> 300.06 | <b>Nucleus</b> 1H               | <b>Number of Transients</b> 1                     |
| <b>Original Points Count</b> 9600                                  | <b>Points Count</b> 16384     | <b>Pulse Sequence</b> s2pul     | <b>Receiver Gain</b> 8.00                         |
| <b>Spectrum Offset (Hz)</b> 1467.7166                              | <b>Spectrum Type</b> STANDARD | <b>Sweep Width (Hz)</b> 4800.00 | <b>Temperature (degree C)</b> AMBIENT TEMPERATURE |

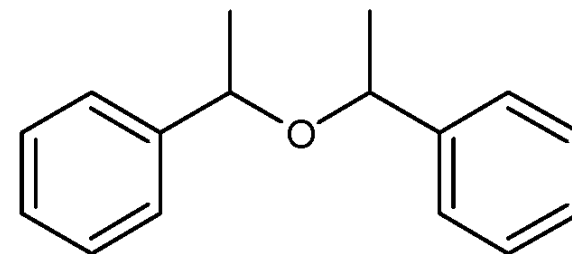

2-1H.esp

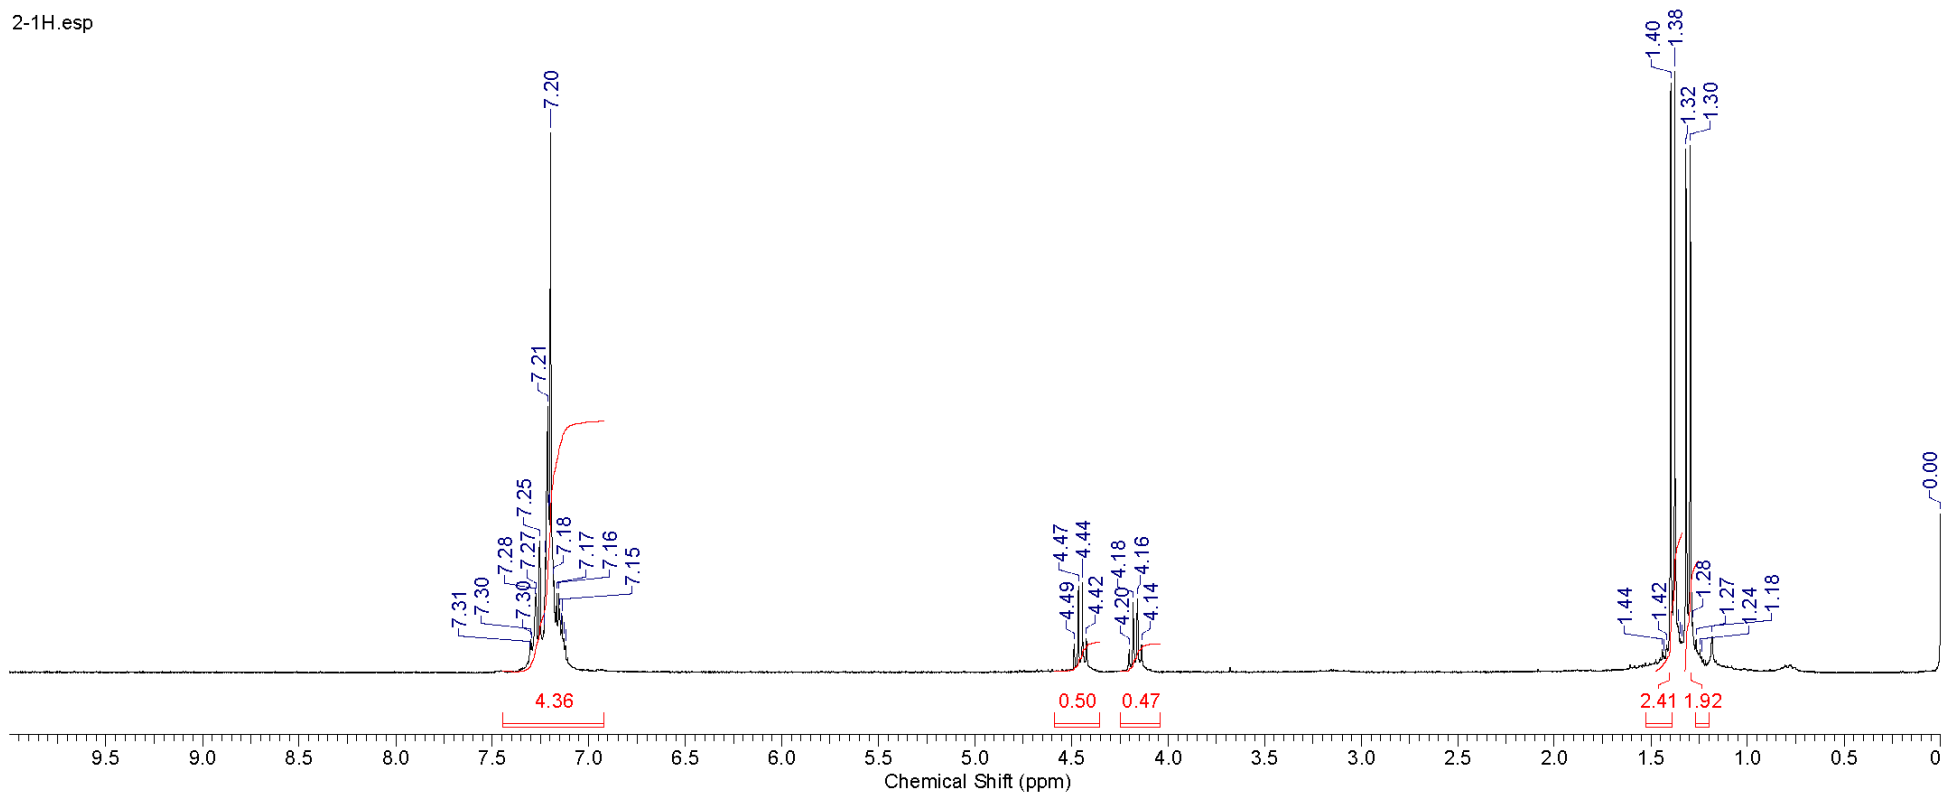

|                                                  |                    |
|--------------------------------------------------|--------------------|
| <b>Formula</b> C <sub>16</sub> H <sub>10</sub> O | <b>FW</b> 226.3135 |
|--------------------------------------------------|--------------------|

|                                                                     |                                       |                               |                                  |
|---------------------------------------------------------------------|---------------------------------------|-------------------------------|----------------------------------|
| <b>Acquisition Time (sec)</b> 1.8150                                | <b>Comment</b> CC2-13C                | <b>Date</b> Aug 8 2008        | <b>Date Stamp</b> Aug 8 2008     |
| <b>File Name</b> C:\Users\User\Desktop\adam\CCclean\CC2-13C.fid\fid | <b>Frequency (MHz)</b> 75.46          | <b>Nucleus</b> 13C            | <b>Number of Transients</b> 136  |
| <b>Original Points Count</b> 34053                                  | <b>Points Count</b> 65536             | <b>Pulse Sequence</b> s2pul   | <b>Receiver Gain</b> 37.00       |
| <b>Solvent</b> CHLOROFORM-d                                         | <b>Spectrum Offset (Hz)</b> 7541.7852 | <b>Spectrum Type</b> STANDARD | <b>Sweep Width (Hz)</b> 18761.73 |
| <b>Temperature (degree C)</b> AMBIENT TEMPERATURE                   |                                       |                               |                                  |

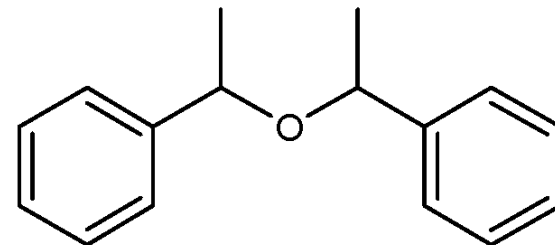

2-13C.esp

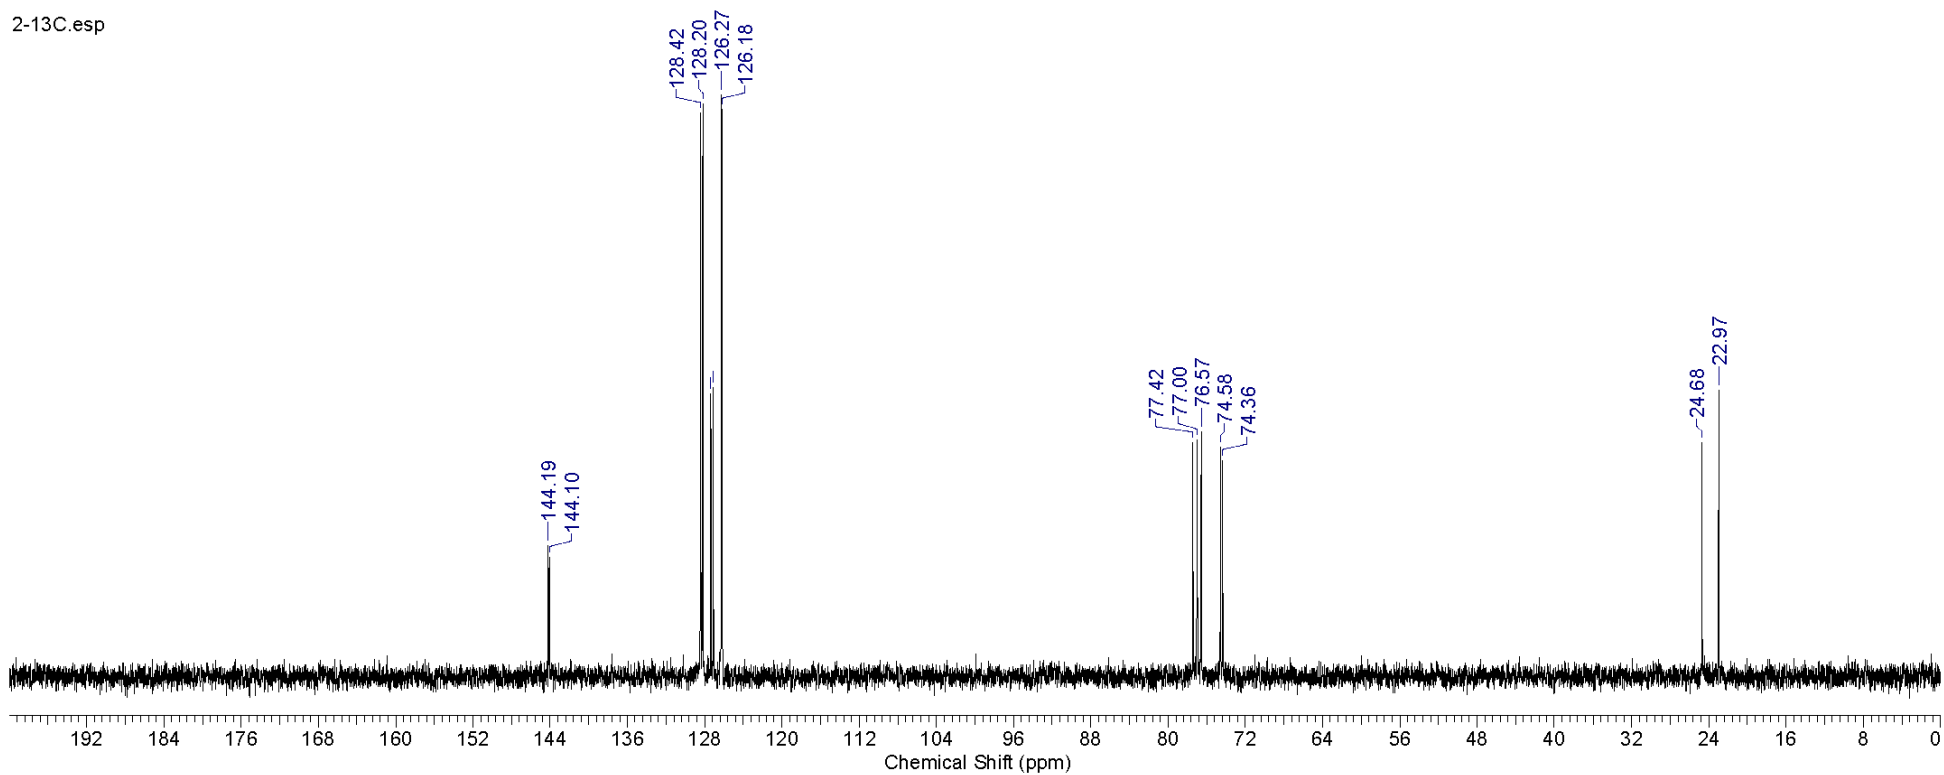



2

|                                                  |                    |
|--------------------------------------------------|--------------------|
| <b>Formula</b> C <sub>15</sub> H <sub>16</sub> O | <b>FW</b> 212.2869 |
|--------------------------------------------------|--------------------|

|                                                           |                                    |                                      |                                        |
|-----------------------------------------------------------|------------------------------------|--------------------------------------|----------------------------------------|
| <b>Acquisition Time (sec)</b> 3.9846                      | <b>Comment</b> CC1-1H              | <b>Date</b> 26 Oct 2010 14:03:12     | <b>Date Stamp</b> 26 Oct 2010 14:03:12 |
| <b>File Name</b> C:\Users\User\Desktop\adam\nmr\CC1\1\fid | <b>Frequency (MHz)</b> 400.17      | <b>Nucleus</b> 1H                    | <b>Number of Transients</b> 16         |
| <b>Origin</b> spect                                       | <b>Original Points Count</b> 32768 | <b>Owner</b> nmrsu                   | <b>Points Count</b> 32768              |
| <b>Receiver Gain</b> 40.30                                | <b>SW(cyclical) (Hz)</b> 8223.68   | <b>Solvent</b> CHLOROFORM-d          | <b>Spectrum Offset (Hz)</b> 2455.1277  |
| <b>Spectrum Type</b> STANDARD                             | <b>Sweep Width (Hz)</b> 8223.43    | <b>Temperature (degree C)</b> 23.600 |                                        |

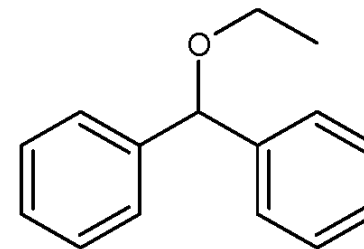

4a-1H.esp

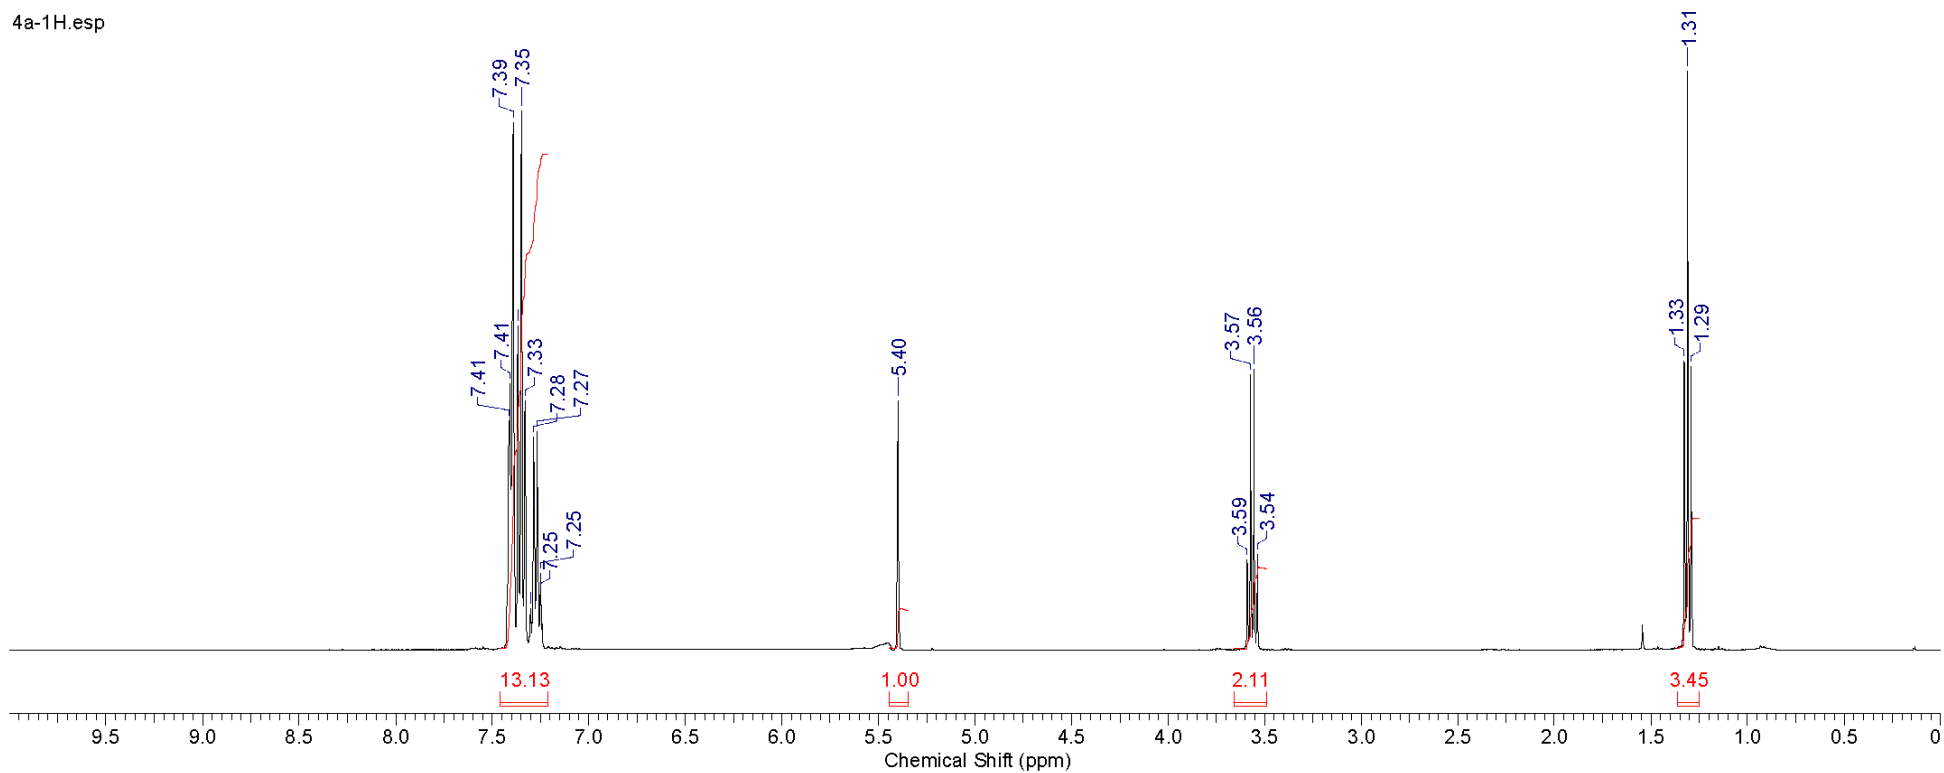

2

|                                                  |                    |
|--------------------------------------------------|--------------------|
| <b>Formula</b> C <sub>15</sub> H <sub>16</sub> O | <b>FW</b> 212.2869 |
|--------------------------------------------------|--------------------|

|                                                           |                                    |                                      |                                        |
|-----------------------------------------------------------|------------------------------------|--------------------------------------|----------------------------------------|
| <b>Acquisition Time (sec)</b> 1.3631                      | <b>Comment</b> CC1-13C             | <b>Date</b> 27 Oct 2010 15:11:28     | <b>Date Stamp</b> 27 Oct 2010 15:11:28 |
| <b>File Name</b> C:\Users\User\Desktop\adam\nmr\CC1\2\fid | <b>Frequency (MHz)</b> 100.62      | <b>Nucleus</b> 13C                   | <b>Number of Transients</b> 450        |
| <b>Origin</b> spect                                       | <b>Original Points Count</b> 32768 | <b>Owner</b> nmrsu                   | <b>Points Count</b> 32768              |
| <b>Receiver Gain</b> 114.00                               | <b>SW(cyclical) (Hz)</b> 24038.46  | <b>Solvent</b> CHLOROFORM-d          | <b>Spectrum Offset (Hz)</b> 10035.5586 |
| <b>Spectrum Type</b> STANDARD                             | <b>Sweep Width (Hz)</b> 24037.73   | <b>Temperature (degree C)</b> 25.000 |                                        |

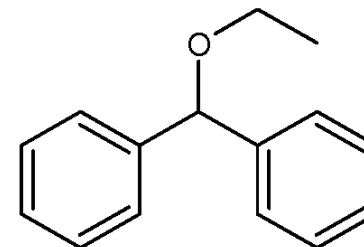

4a-13C.esp

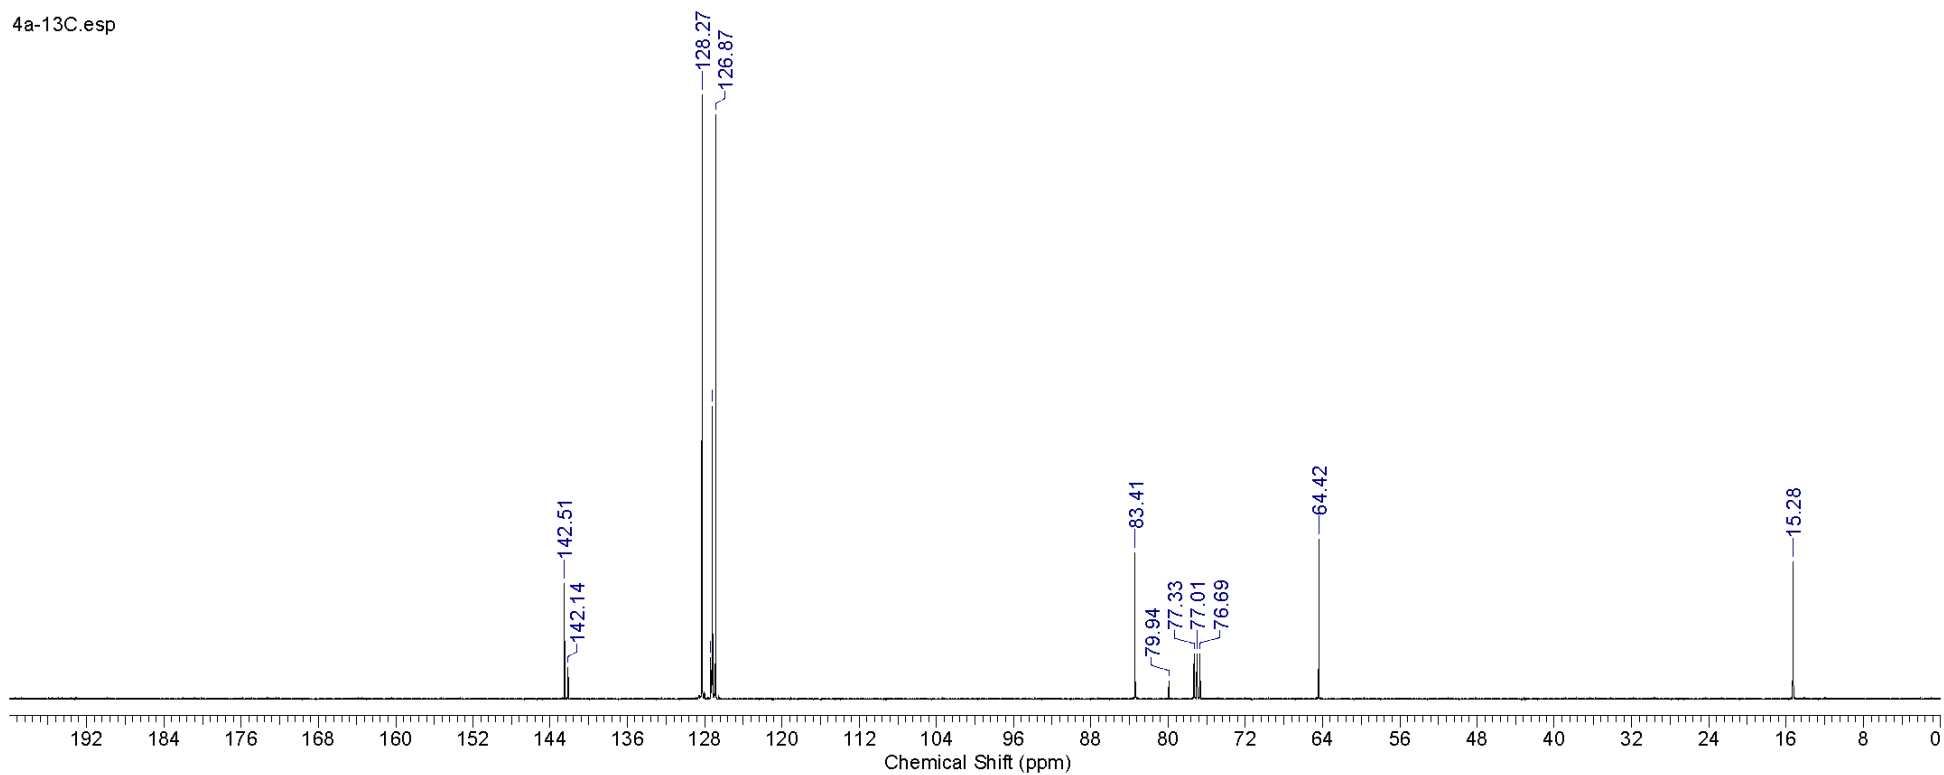

|                                                  |                    |
|--------------------------------------------------|--------------------|
| <b>Formula</b> C <sub>16</sub> H <sub>16</sub> O | <b>FW</b> 224.2976 |
|--------------------------------------------------|--------------------|

|                                                                    |                               |                                 |                                                   |
|--------------------------------------------------------------------|-------------------------------|---------------------------------|---------------------------------------------------|
| <b>Acquisition Time (sec)</b> 2.0000                               | <b>Comment</b> CC3-1H         | <b>Date</b> Feb 21 2011         | <b>Date Stamp</b> Feb 21 2011                     |
| <b>File Name</b> C:\Users\User\Desktop\adam\CCclean\CC3-1H.fid\fid | <b>Frequency (MHz)</b> 300.08 | <b>Nucleus</b> 1H               | <b>Number of Transients</b> 4                     |
| <b>Original Points Count</b> 9600                                  | <b>Points Count</b> 16384     | <b>Pulse Sequence</b> s2pul     | <b>Receiver Gain</b> 3.00                         |
| <b>Spectrum Offset (Hz)</b> 1493.5874                              | <b>Spectrum Type</b> STANDARD | <b>Sweep Width (Hz)</b> 4800.00 | <b>Temperature (degree C)</b> AMBIENT TEMPERATURE |

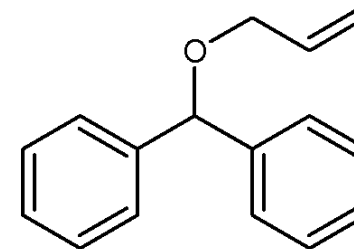

4b-1H.esp

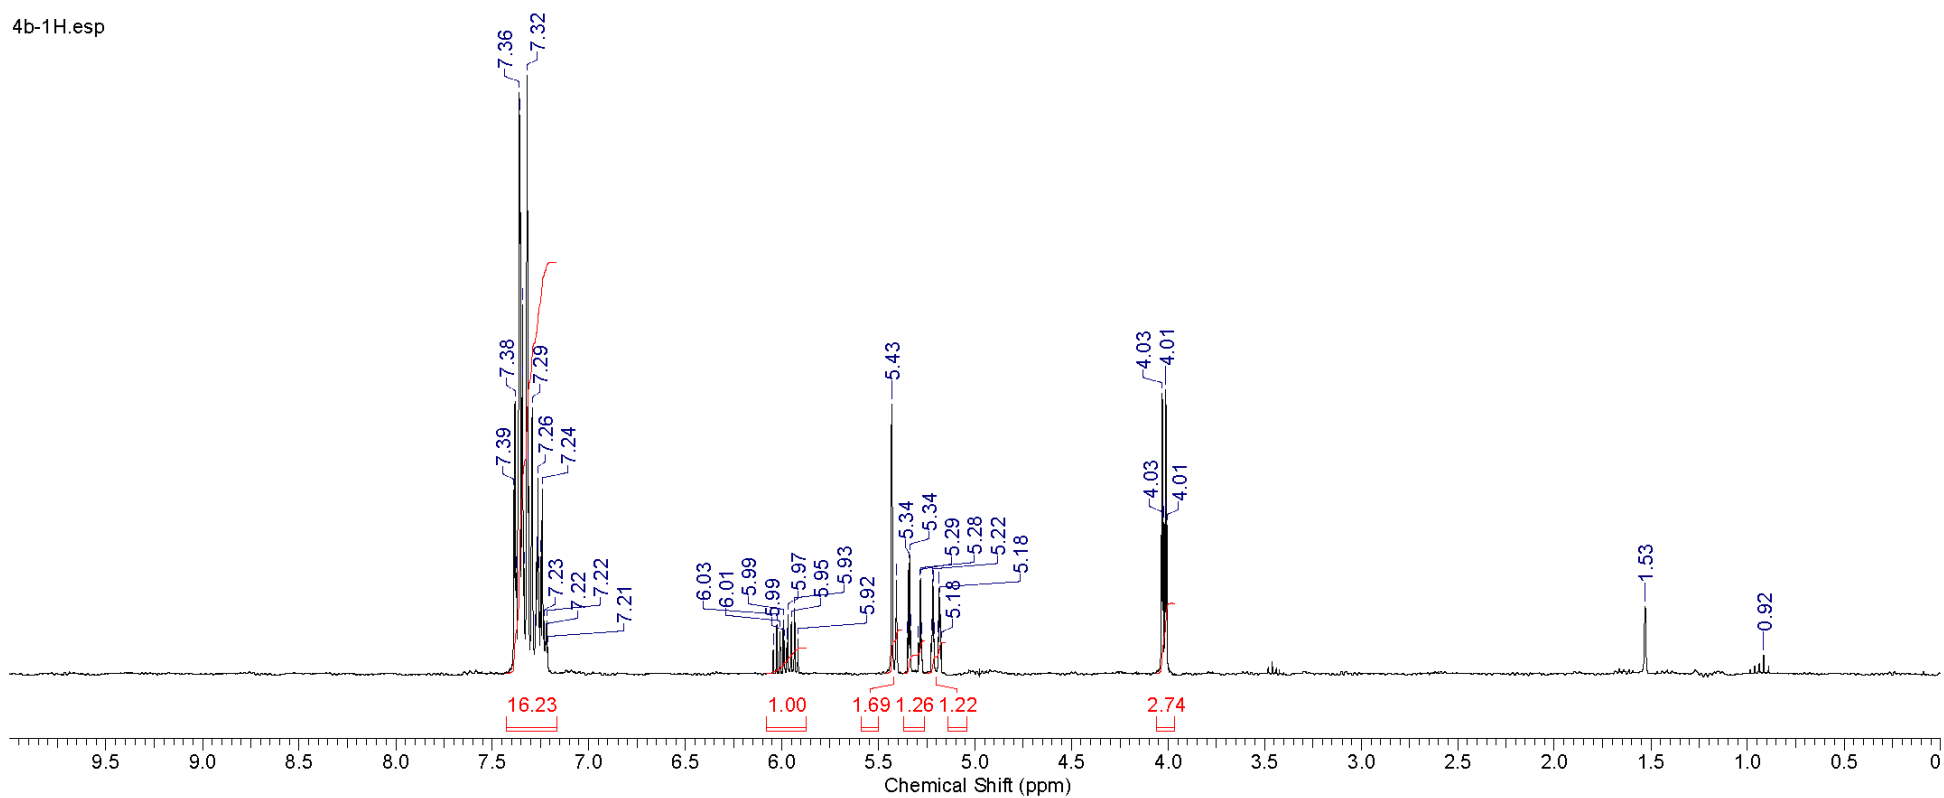

|                                                  |                    |
|--------------------------------------------------|--------------------|
| <b>Formula</b> C <sub>16</sub> H <sub>16</sub> O | <b>FW</b> 224.2976 |
|--------------------------------------------------|--------------------|

|                                                                     |                                       |                               |                                  |
|---------------------------------------------------------------------|---------------------------------------|-------------------------------|----------------------------------|
| <b>Acquisition Time (sec)</b> 1.8150                                | <b>Comment</b> CC3-13C                | <b>Date</b> Feb 21 2011       | <b>Date Stamp</b> Feb 21 2011    |
| <b>File Name</b> C:\Users\User\Desktop\adam\CCclean\CC3-13C.fid\fid | <b>Frequency (MHz)</b> 75.46          | <b>Nucleus</b> 13C            | <b>Number of Transients</b> 5000 |
| <b>Original Points Count</b> 34053                                  | <b>Points Count</b> 65536             | <b>Pulse Sequence</b> s2pul   | <b>Receiver Gain</b> 30.00       |
| <b>Solvent</b> CHLOROFORM-d                                         | <b>Spectrum Offset (Hz)</b> 7541.6602 | <b>Spectrum Type</b> STANDARD | <b>Sweep Width (Hz)</b> 18761.73 |
| <b>Temperature (degree C)</b> AMBIENT TEMPERATURE                   |                                       |                               |                                  |

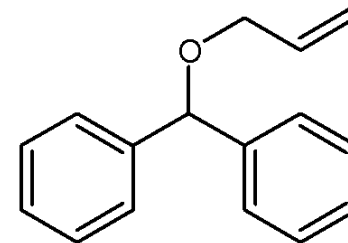

4b-13C.esp

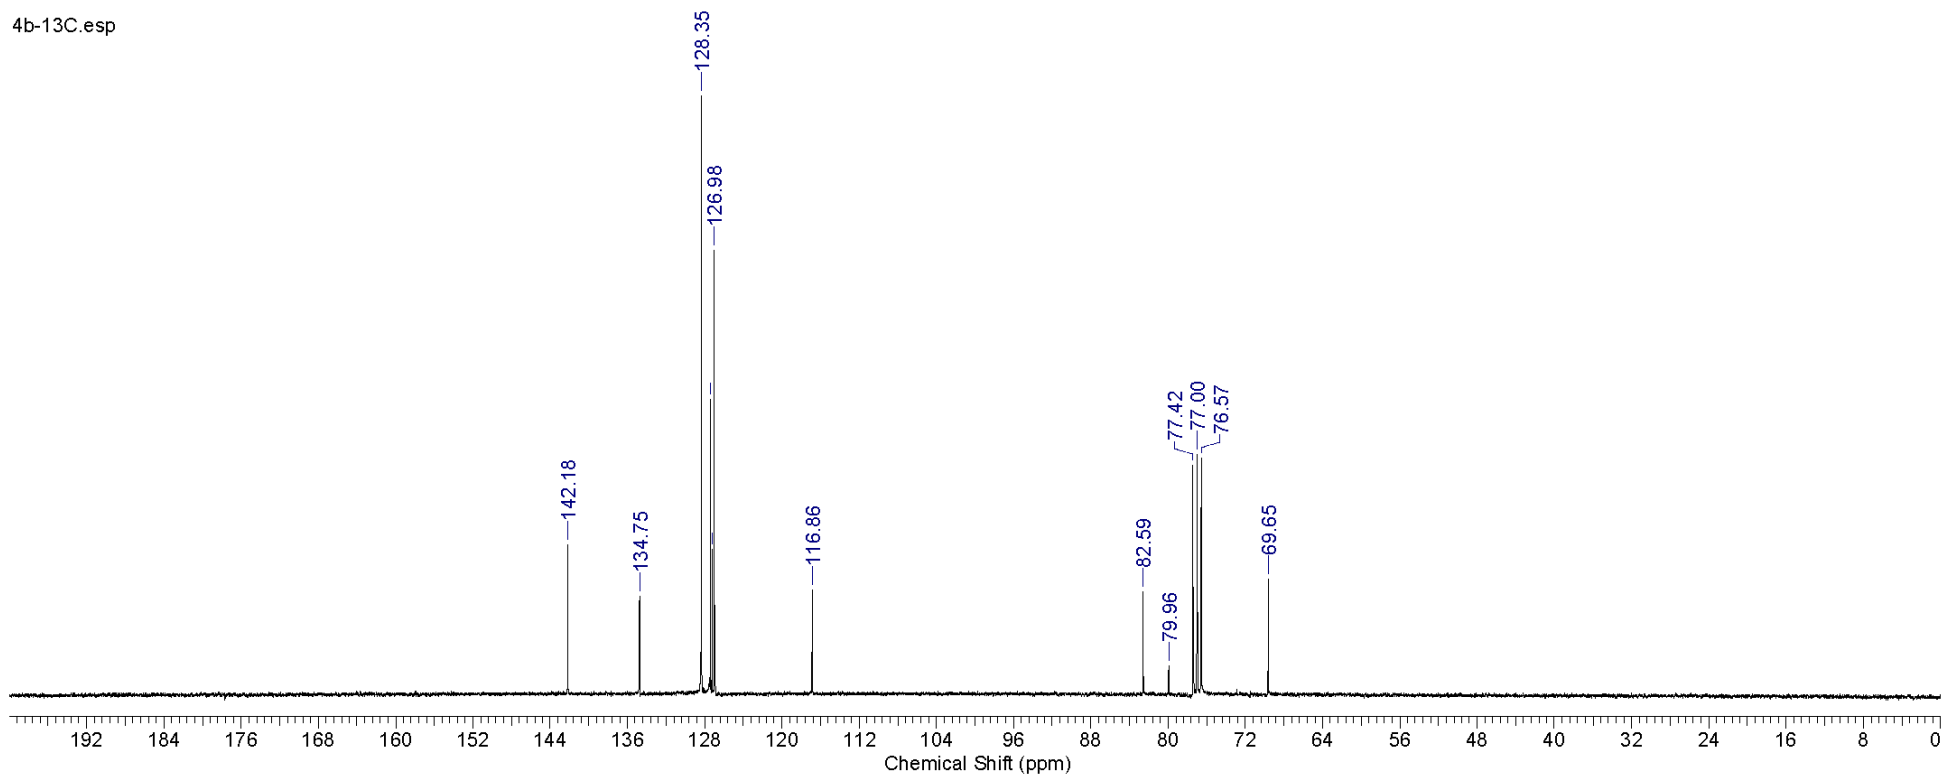

2

|                                                  |                    |
|--------------------------------------------------|--------------------|
| <b>Formula</b> C <sub>16</sub> H <sub>14</sub> O | <b>FW</b> 222.2818 |
|--------------------------------------------------|--------------------|

|                                                           |                                    |                                      |                                        |
|-----------------------------------------------------------|------------------------------------|--------------------------------------|----------------------------------------|
| <b>Acquisition Time (sec)</b> 3.9846                      | <b>Comment</b> CC4-1H              | <b>Date</b> 28 Oct 2010 11:44:32     | <b>Date Stamp</b> 28 Oct 2010 11:44:32 |
| <b>File Name</b> C:\Users\User\Desktop\adam\nmr\CC4\1\fid | <b>Frequency (MHz)</b> 400.17      | <b>Nucleus</b> 1H                    | <b>Number of Transients</b> 16         |
| <b>Origin</b> spect                                       | <b>Original Points Count</b> 32768 | <b>Owner</b> nmrsu                   | <b>Points Count</b> 32768              |
| <b>Receiver Gain</b> 16.00                                | <b>SW(cyclical) (Hz)</b> 8223.68   | <b>Solvent</b> CHLOROFORM-d          | <b>Spectrum Offset (Hz)</b> 2455.4199  |
| <b>Spectrum Type</b> STANDARD                             | <b>Sweep Width (Hz)</b> 8223.43    | <b>Temperature (degree C)</b> 22.600 |                                        |

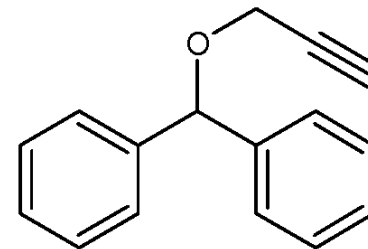

4c-1H.esp

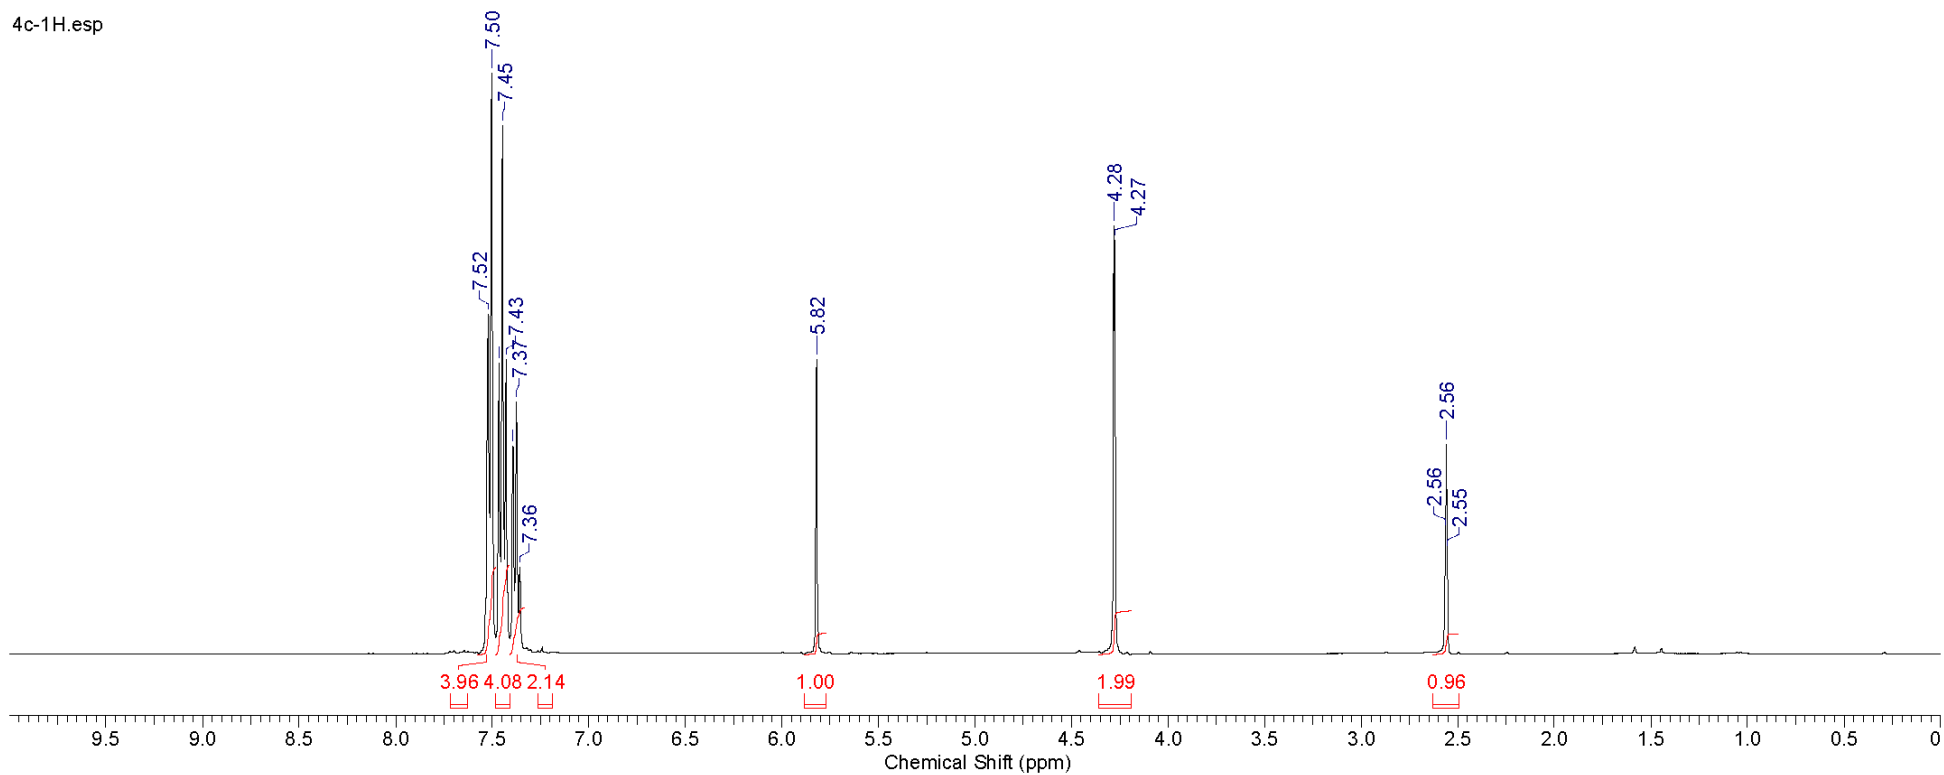

2

|                                                  |                    |
|--------------------------------------------------|--------------------|
| <b>Formula</b> C <sub>16</sub> H <sub>14</sub> O | <b>FW</b> 222.2818 |
|--------------------------------------------------|--------------------|

|                                                           |                                    |                                      |                                        |
|-----------------------------------------------------------|------------------------------------|--------------------------------------|----------------------------------------|
| <b>Acquisition Time (sec)</b> 1.3631                      | <b>Comment</b> CC4-13C             | <b>Date</b> 28 Oct 2010 12:10:08     | <b>Date Stamp</b> 28 Oct 2010 12:10:08 |
| <b>File Name</b> C:\Users\User\Desktop\adam\nmr\CC4\2\fid | <b>Frequency (MHz)</b> 100.62      | <b>Nucleus</b> 13C                   | <b>Number of Transients</b> 450        |
| <b>Origin</b> spect                                       | <b>Original Points Count</b> 32768 | <b>Owner</b> nmrsu                   | <b>Points Count</b> 32768              |
| <b>Receiver Gain</b> 114.00                               | <b>SW(cyclical) (Hz)</b> 24038.46  | <b>Solvent</b> CHLOROFORM-d          | <b>Spectrum Offset (Hz)</b> 10028.1855 |
| <b>Spectrum Type</b> STANDARD                             | <b>Sweep Width (Hz)</b> 24037.73   | <b>Temperature (degree C)</b> 23.100 |                                        |



4c-13C.esp

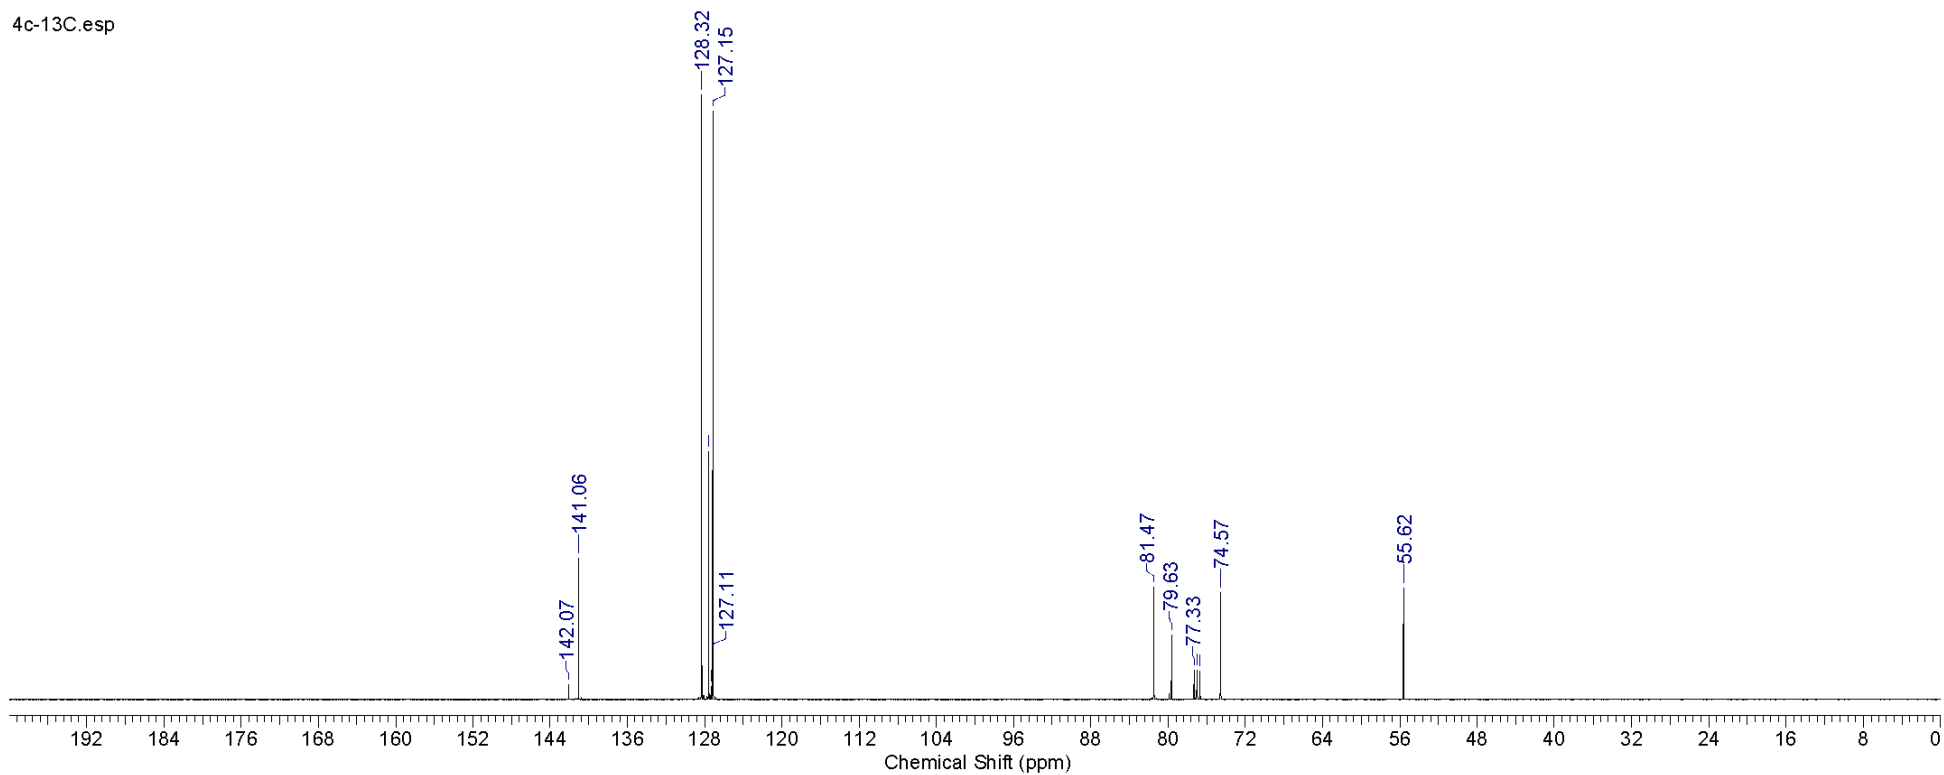

|                                                               |                    |
|---------------------------------------------------------------|--------------------|
| <b>Formula</b> C <sub>10</sub> H <sub>10</sub> O <sub>2</sub> | <b>FW</b> 266.3343 |
|---------------------------------------------------------------|--------------------|

|                                                            |                                    |                                      |                                        |
|------------------------------------------------------------|------------------------------------|--------------------------------------|----------------------------------------|
| <b>Acquisition Time (sec)</b> 3.9846                       | <b>Comment</b> CC40-1H             | <b>Date</b> 28 Oct 2010 14:26:40     | <b>Date Stamp</b> 28 Oct 2010 14:26:40 |
| <b>File Name</b> C:\Users\User\Desktop\adam\nmr\CC40\1\fid | <b>Frequency (MHz)</b> 400.17      | <b>Nucleus</b> 1H                    | <b>Number of Transients</b> 16         |
| <b>Origin</b> spect                                        | <b>Original Points Count</b> 32768 | <b>Owner</b> nmrsu                   | <b>Points Count</b> 32768              |
| <b>Receiver Gain</b> 20.20                                 | <b>SW(cyclical) (Hz)</b> 8223.68   | <b>Solvent</b> CHLOROFORM-d          | <b>Spectrum Offset (Hz)</b> 2458.0571  |
| <b>Spectrum Type</b> STANDARD                              | <b>Sweep Width (Hz)</b> 8223.43    | <b>Temperature (degree C)</b> 23.700 |                                        |

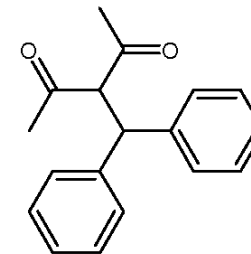

4d-1H.esp

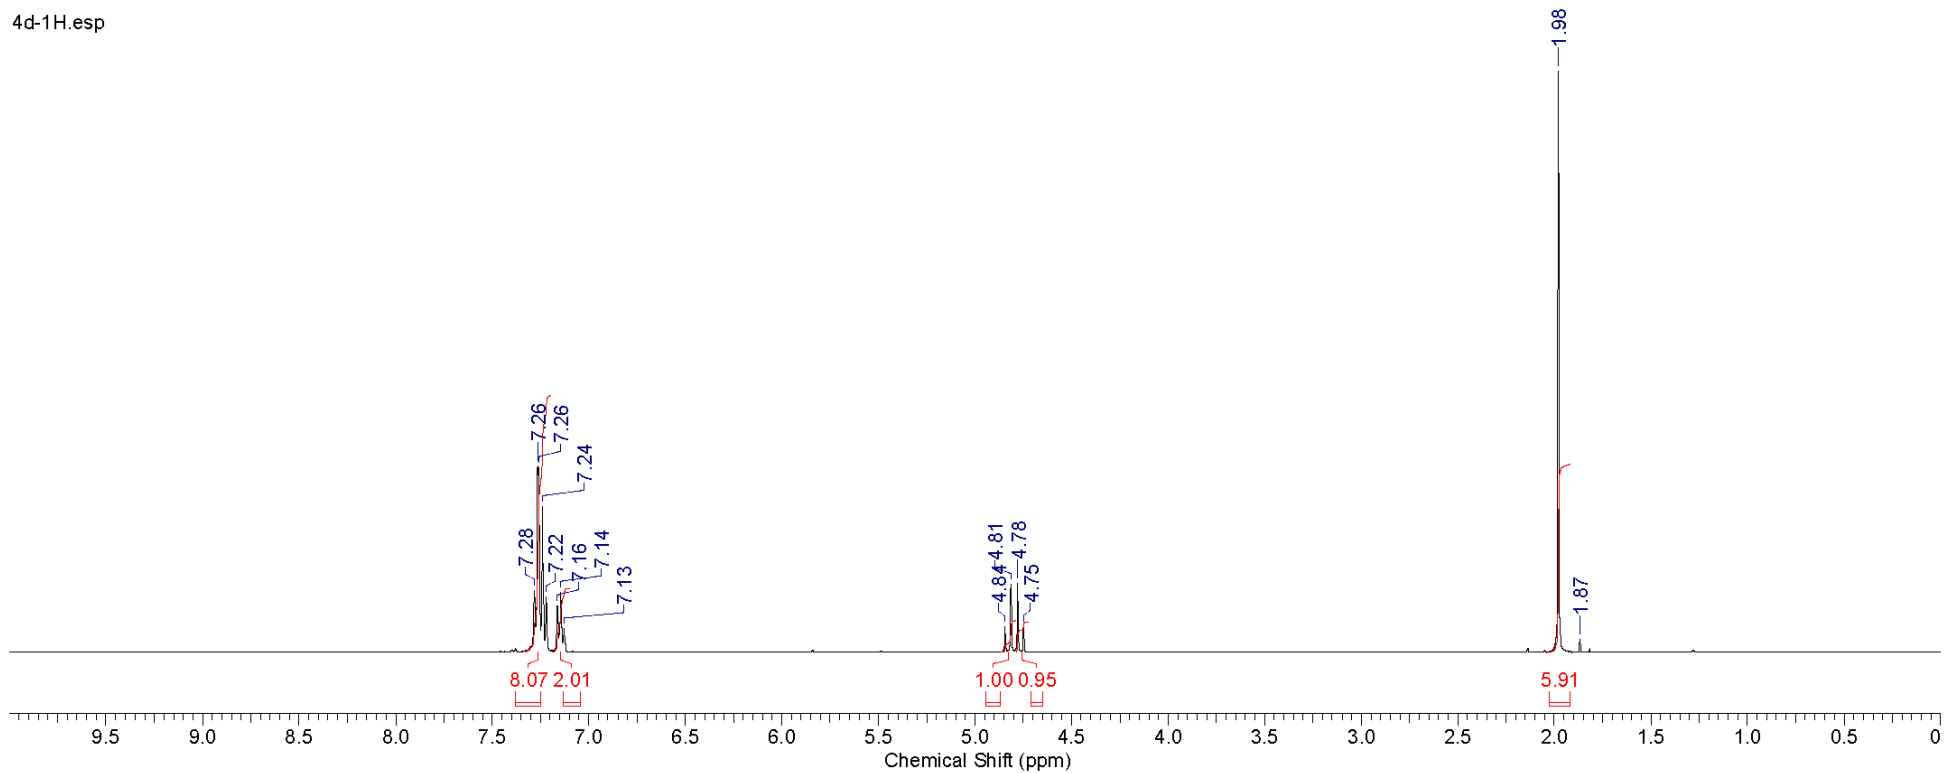

Formula C<sub>10</sub>H<sub>10</sub>O<sub>2</sub> FW 266.3343

|                        |                                           |                       |          |                        |                      |                      |                      |
|------------------------|-------------------------------------------|-----------------------|----------|------------------------|----------------------|----------------------|----------------------|
| Acquisition Time (sec) | 1.3631                                    | Comment               | CC40-13C | Date                   | 28 Oct 2010 14:54:24 | Date Stamp           | 28 Oct 2010 14:54:24 |
| File Name              | C:\Users\User\Desktop\adam\nmr\CC40\2\fid | Frequency (MHz)       | 100.62   | Nucleus                | 13C                  | Number of Transients | 450                  |
| Origin                 | spect                                     | Original Points Count | 32768    | Owner                  | nmsu                 | Points Count         | 32768                |
| Receiver Gain          | 114.00                                    | SW(cyclical) (Hz)     | 24038.46 | Solvent                | CHLOROFORM-d         | Pulse Sequence       | zgig30               |
| Spectrum Type          | STANDARD                                  | Sweep Width (Hz)      | 24037.73 | Temperature (degree C) | 24.300               | Spectrum Offset (Hz) | 10037.5996           |



4d-13C.esp

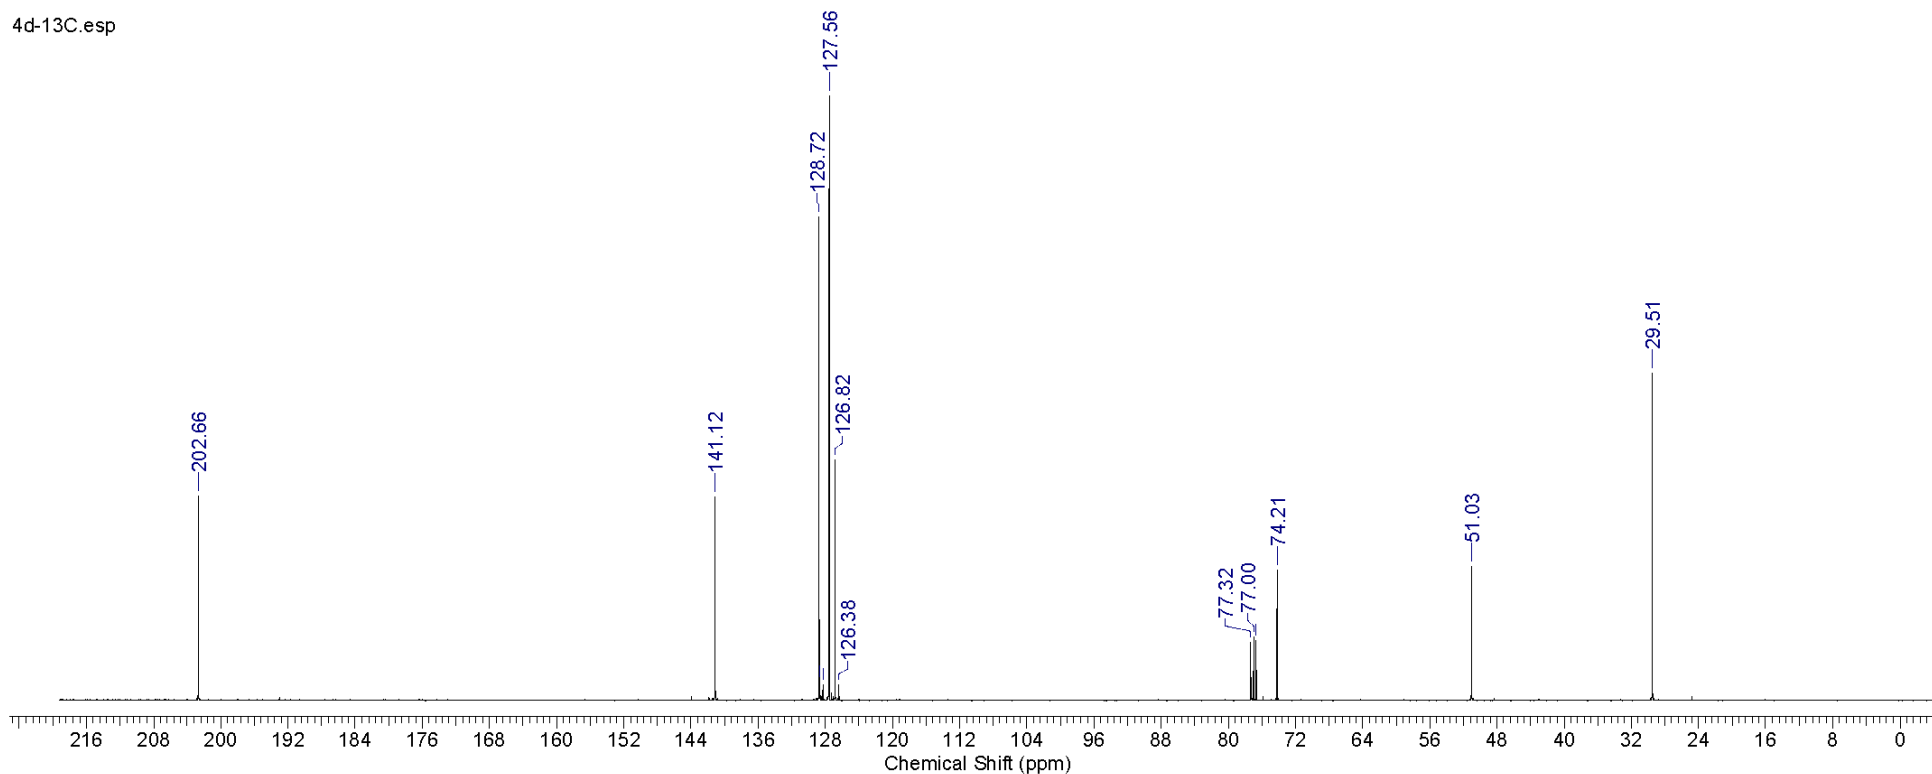



Formula C<sub>17</sub>H<sub>15</sub>O<sub>2</sub>? FW 251.2998+?

|                        |                                           |                       |           |                        |                      |                      |                      |
|------------------------|-------------------------------------------|-----------------------|-----------|------------------------|----------------------|----------------------|----------------------|
| Acquisition Time (sec) | 3.9846                                    | Comment               | CC41-1H-1 | Date                   | 02 Nov 2010 13:58:56 | Date Stamp           | 02 Nov 2010 13:58:56 |
| File Name              | C:\Users\User\Desktop\adam\nmr\CC41\3\fid | Frequency (MHz)       | 400.17    | Nucleus                | 1H                   | Number of Transients | 16                   |
| Origin                 | spect                                     | Original Points Count | 32768     | Owner                  | nmr-su               | Points Count         | 32768                |
| Receiver Gain          | 128.00                                    | SW(cyclical) (Hz)     | 8223.68   | Solvent                | CHLOROFORM-d         | Pulse Sequence       | zg30                 |
| Spectrum Type          | STANDARD                                  | Sweep Width (Hz)      | 8223.43   | Temperature (degree C) | 24.400               | Spectrum Offset (Hz) | 2455.4636            |

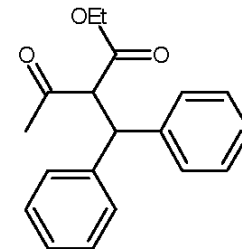

4e-1H.esp

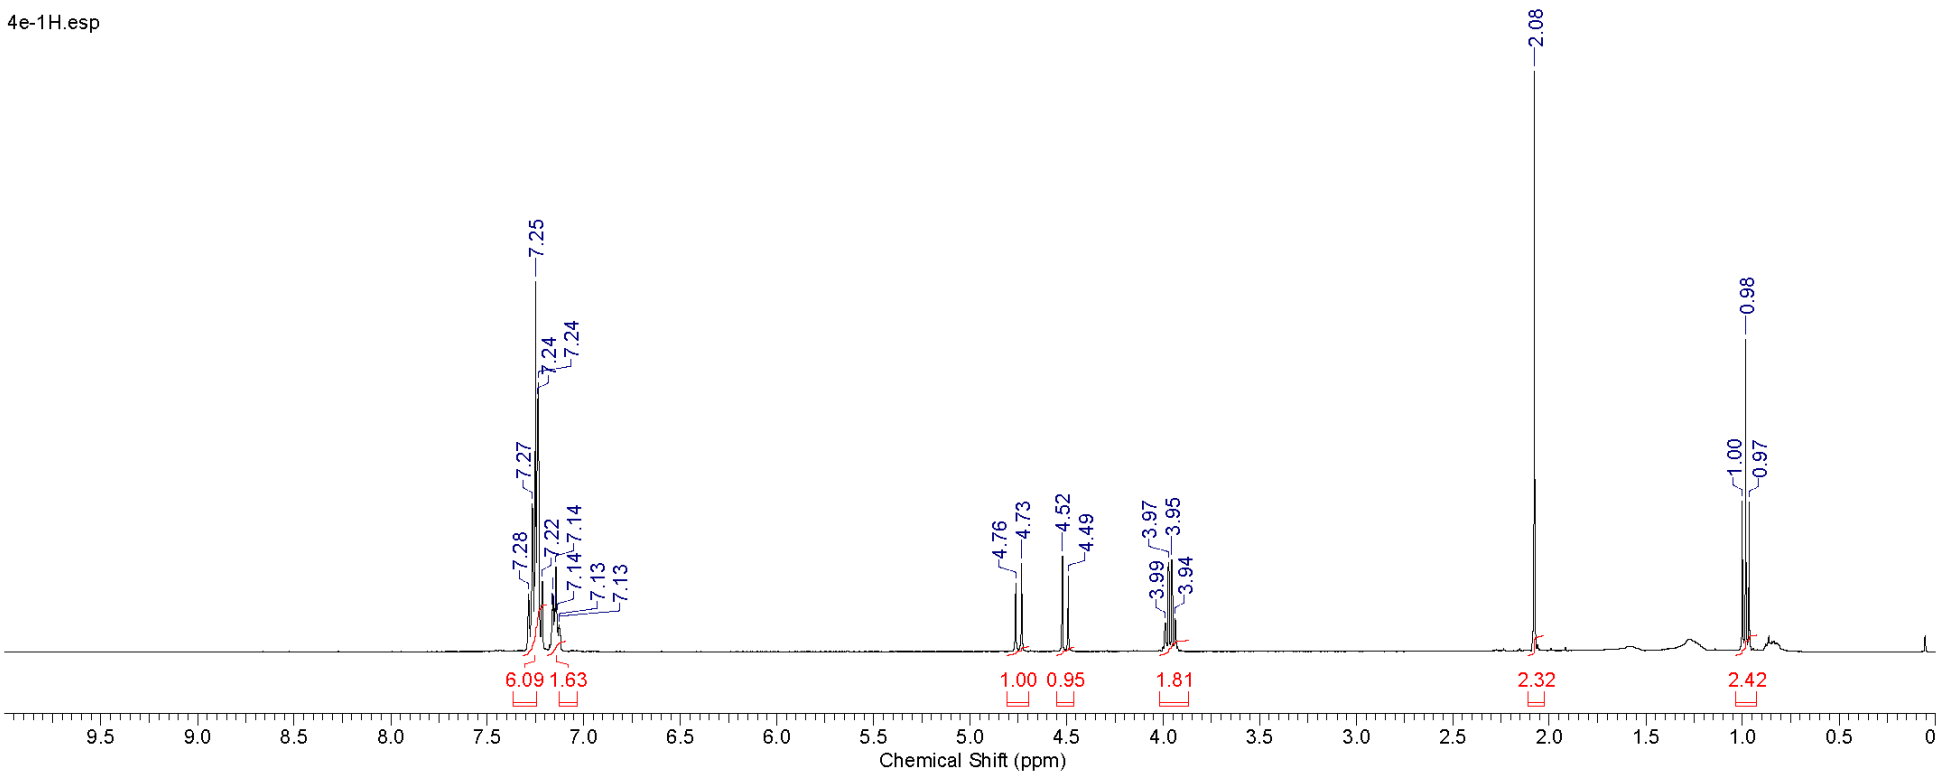

Formula C<sub>17</sub>H<sub>15</sub>O<sub>2</sub>? FW 251.2998+?

|                        |                                           |                       |          |                        |                      |                      |                      |
|------------------------|-------------------------------------------|-----------------------|----------|------------------------|----------------------|----------------------|----------------------|
| Acquisition Time (sec) | 1.3631                                    | Comment               | CC41-13C | Date                   | 02 Nov 2010 15:49:52 | Date Stamp           | 02 Nov 2010 15:49:52 |
| File Name              | C:\Users\User\Desktop\adam\nmr\CC41\4\fid | Frequency (MHz)       | 100.62   | Nucleus                | 13C                  | Number of Transients | 450                  |
| Origin                 | spect                                     | Original Points Count | 32768    | Owner                  | nmsu                 | Points Count         | 32768                |
| Receiver Gain          | 114.00                                    | SW(cyclical) (Hz)     | 24038.46 | Solvent                | CHLOROFORM-d         | Pulse Sequence       | zgig30               |
| Spectrum Type          | STANDARD                                  | Sweep Width (Hz)      | 24037.73 | Temperature (degree C) | 24.100               | Spectrum Offset (Hz) | 10060.0840           |

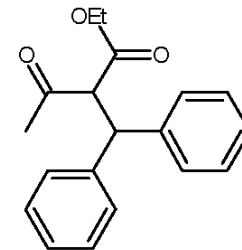

4e-13C.esp

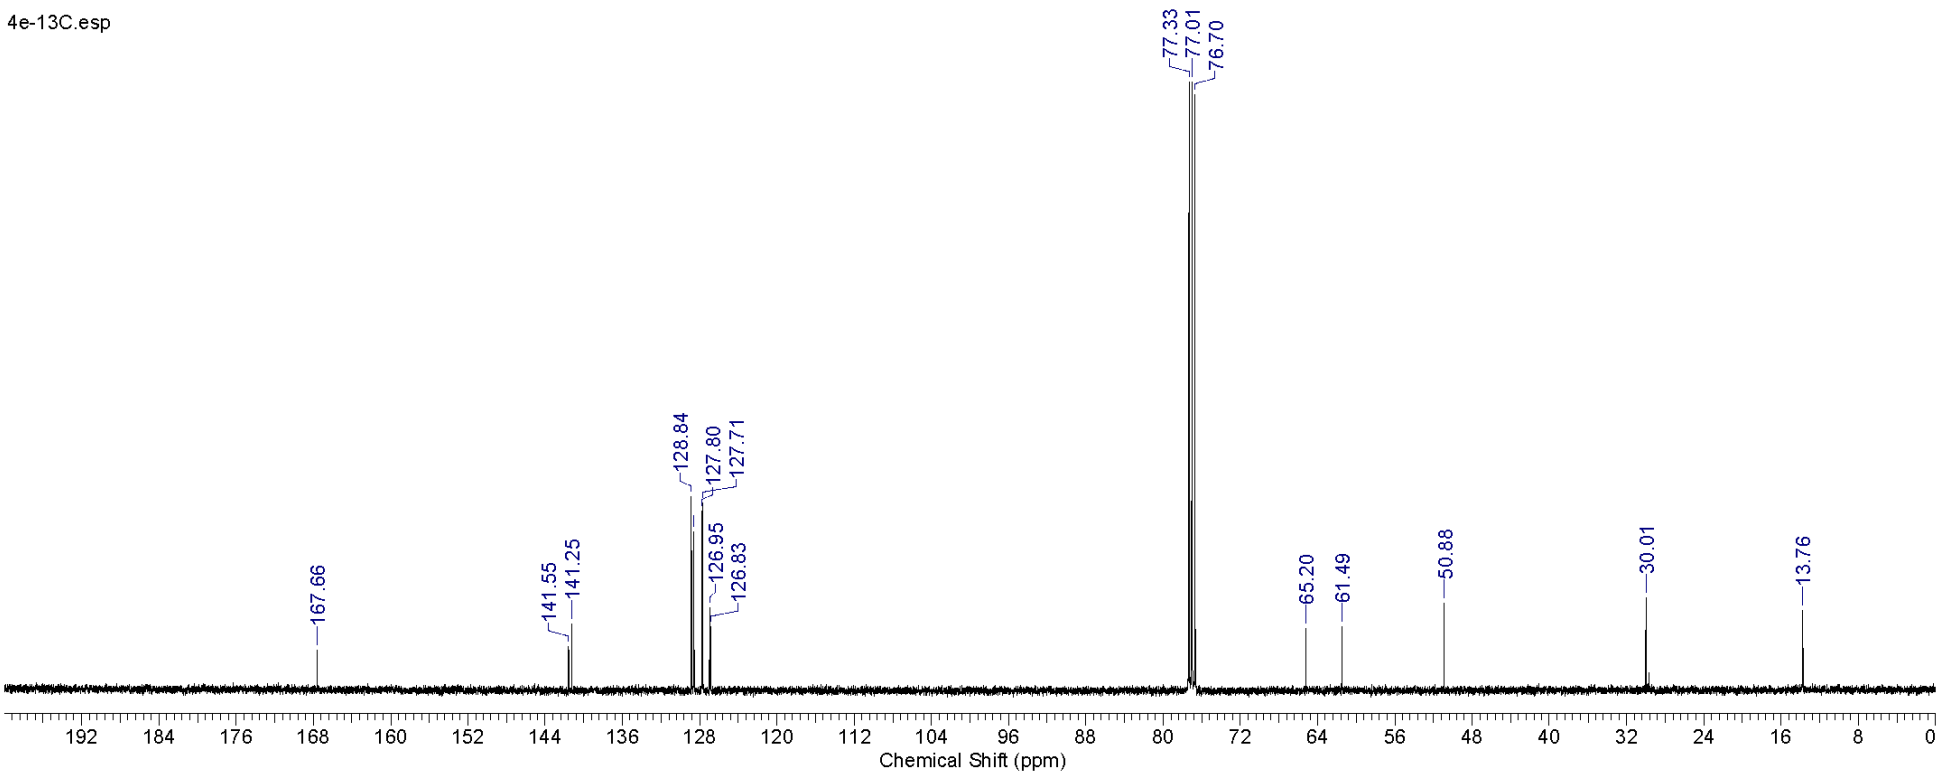

Formula C<sub>19</sub>H<sub>16</sub>S FW 276.3953

|                        |                                                     |               |                 |                  |             |                        |                      |         |              |
|------------------------|-----------------------------------------------------|---------------|-----------------|------------------|-------------|------------------------|----------------------|---------|--------------|
| Acquisition Time (sec) | 2.0000                                              | Comment       | CC119-1H        | Date             | Feb 16 2011 | Date Stamp             | Feb 16 2011          |         |              |
| File Name              | C:\Users\User\Desktop\adam\CCclean\CC119-1H.fid\fid |               | Frequency (MHz) | 300.08           | Nucleus     | 1H                     | Number of Transients | 8       |              |
| Original Points Count  | 9600                                                | Points Count  | 16384           | Pulse Sequence   | s2pul       | Receiver Gain          | 8.00                 | Solvent | CHLOROFORM-d |
| Spectrum Offset (Hz)   | 1497.9822                                           | Spectrum Type | STANDARD        | Sweep Width (Hz) | 4800.00     | Temperature (degree C) | AMBIENT TEMPERATURE  |         |              |

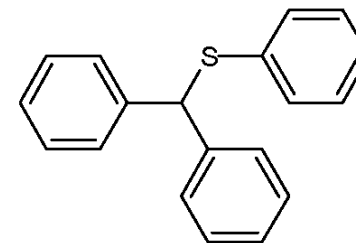

4f-1H.esp

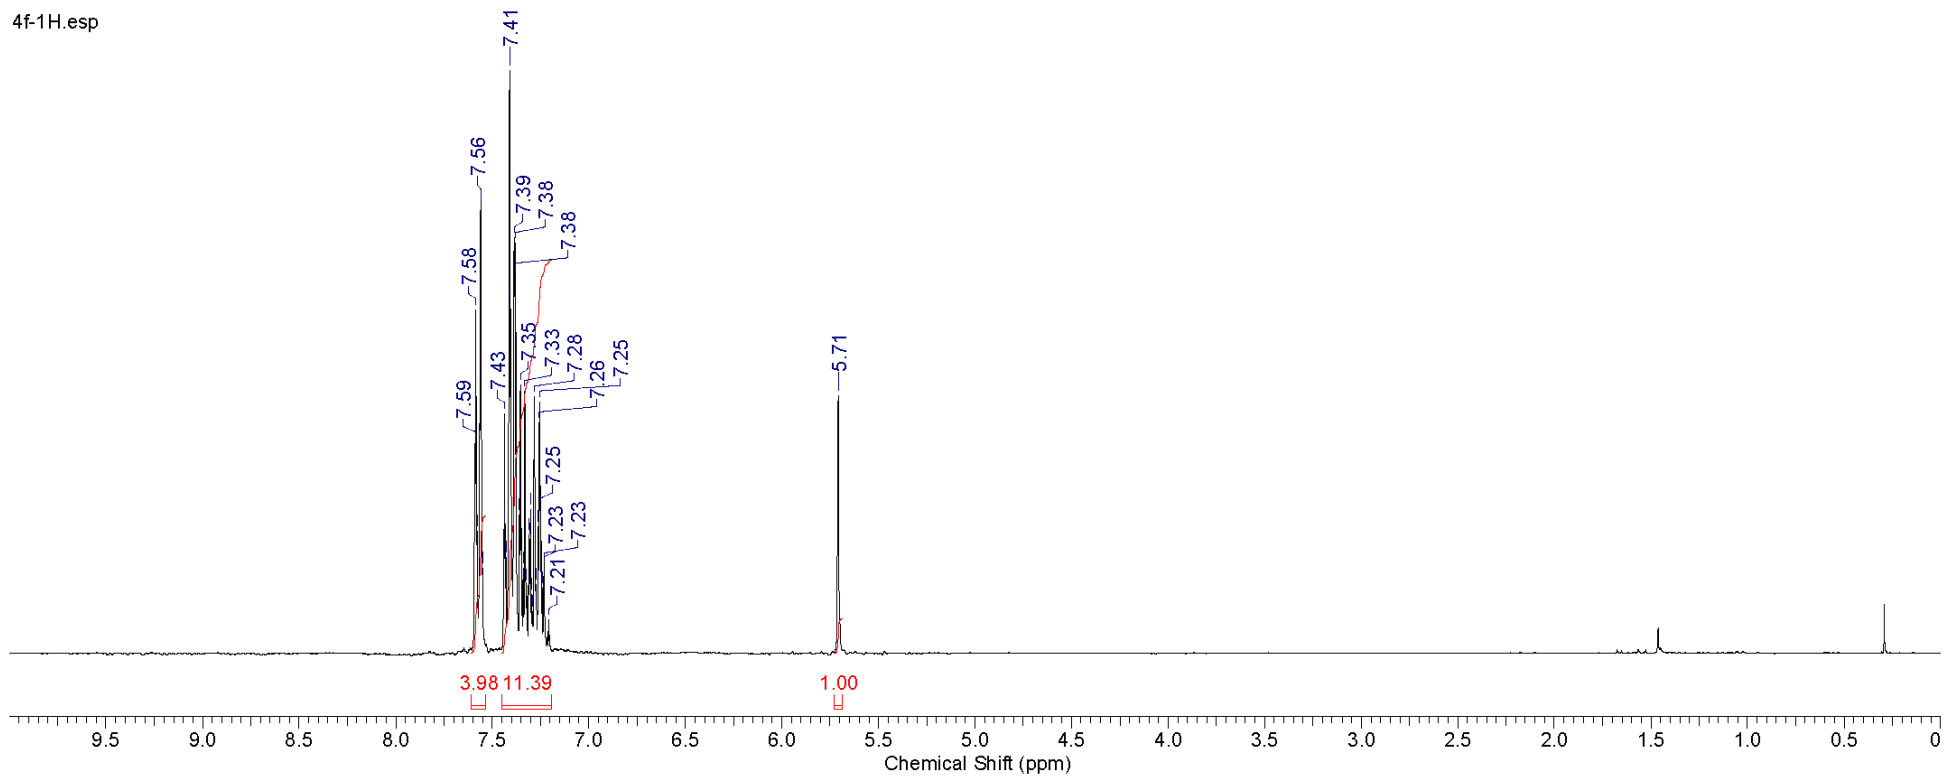

Formula C<sub>19</sub>H<sub>16</sub>S FW 276.3953

|                        |                                                      |              |           |                      |             |               |             |                      |          |
|------------------------|------------------------------------------------------|--------------|-----------|----------------------|-------------|---------------|-------------|----------------------|----------|
| Acquisition Time (sec) | 1.8150                                               | Comment      | CC119-13C | Date                 | Feb 16 2011 | Date Stamp    | Feb 16 2011 |                      |          |
| File Name              | C:\Users\User\Desktop\adam\CCclean\CC119-13C.fid\fid |              |           | Frequency (MHz)      | 75.46       | Nucleus       | 13C         | Number of Transients | 32       |
| Original Points Count  | 34053                                                | Points Count | 65536     | Pulse Sequence       | s2pul       | Receiver Gain | 30.00       |                      |          |
| Solvent                | CHLOROFORM-d                                         |              |           | Spectrum Offset (Hz) | 7523.9121   | Spectrum Type | STANDARD    | Sweep Width (Hz)     | 18761.73 |
| Temperature (degree C) | AMBIENT TEMPERATURE                                  |              |           |                      |             |               |             |                      |          |

4f-13C.esp

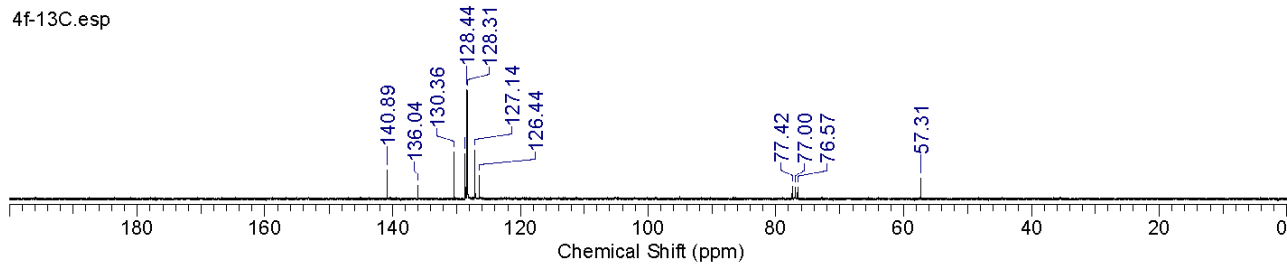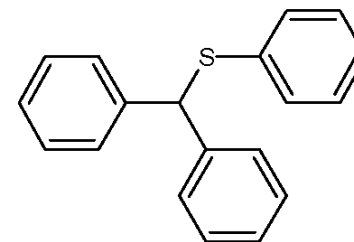

4f-13C.esp

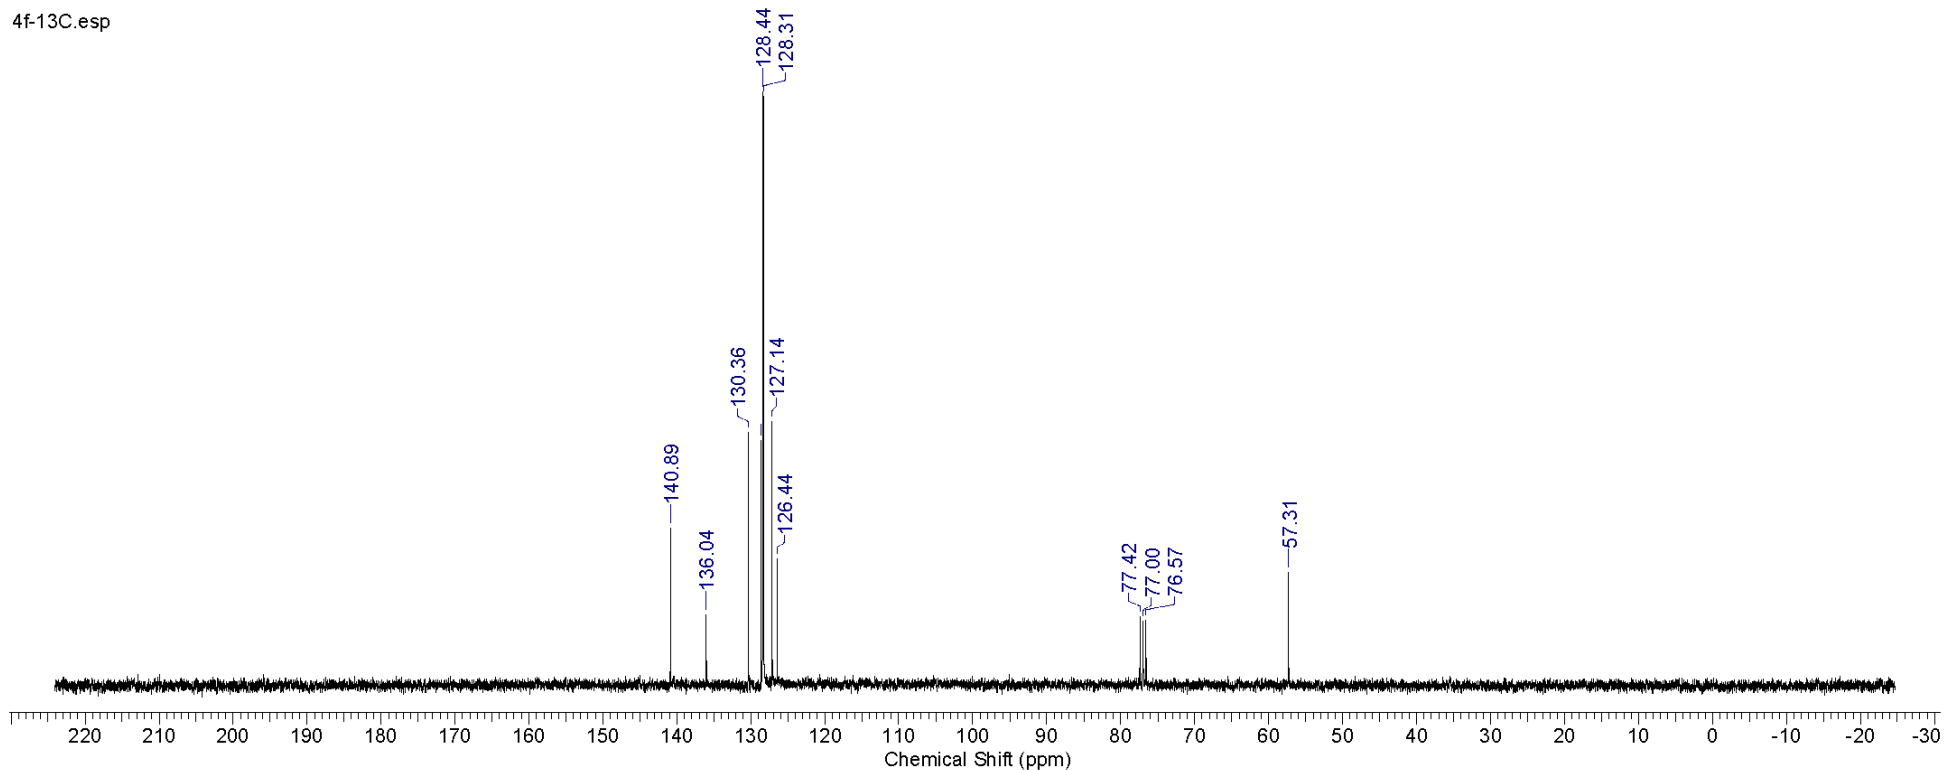

|                                                  |                    |
|--------------------------------------------------|--------------------|
| <b>Formula</b> C <sub>23</sub> H <sub>30</sub> O | <b>FW</b> 322.4837 |
|--------------------------------------------------|--------------------|

|                                                                                   |                               |                                   |                                                   |
|-----------------------------------------------------------------------------------|-------------------------------|-----------------------------------|---------------------------------------------------|
| <b>Acquisition Time (sec)</b> 2.0000                                              | <b>Comment</b> CC29-1H        | <b>Date</b> Oct 6 2011            | <b>Date Stamp</b> Oct 6 2011                      |
| <b>File Name</b> C:\Users\User\Documents\PhD\PhD NMR data\CCclean\CC29-1H.fid\fid | <b>Frequency (MHz)</b> 300.08 |                                   |                                                   |
| <b>Nucleus</b> 1H                                                                 | <b>Number of Transients</b> 4 | <b>Original Points Count</b> 9600 | <b>Points Count</b> 16384                         |
| <b>Pulse Sequence</b> s2pul                                                       | <b>Receiver Gain</b> 14.00    | <b>Solvent</b> CHLOROFORM-d       |                                                   |
| <b>Spectrum Offset (Hz)</b> 1503.7727                                             | <b>Spectrum Type</b> STANDARD | <b>Sweep Width (Hz)</b> 4800.00   | <b>Temperature (degree C)</b> AMBIENT TEMPERATURE |

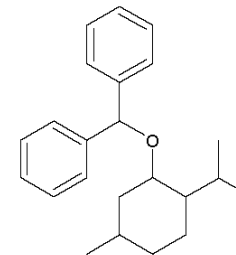

4g-1H.esp

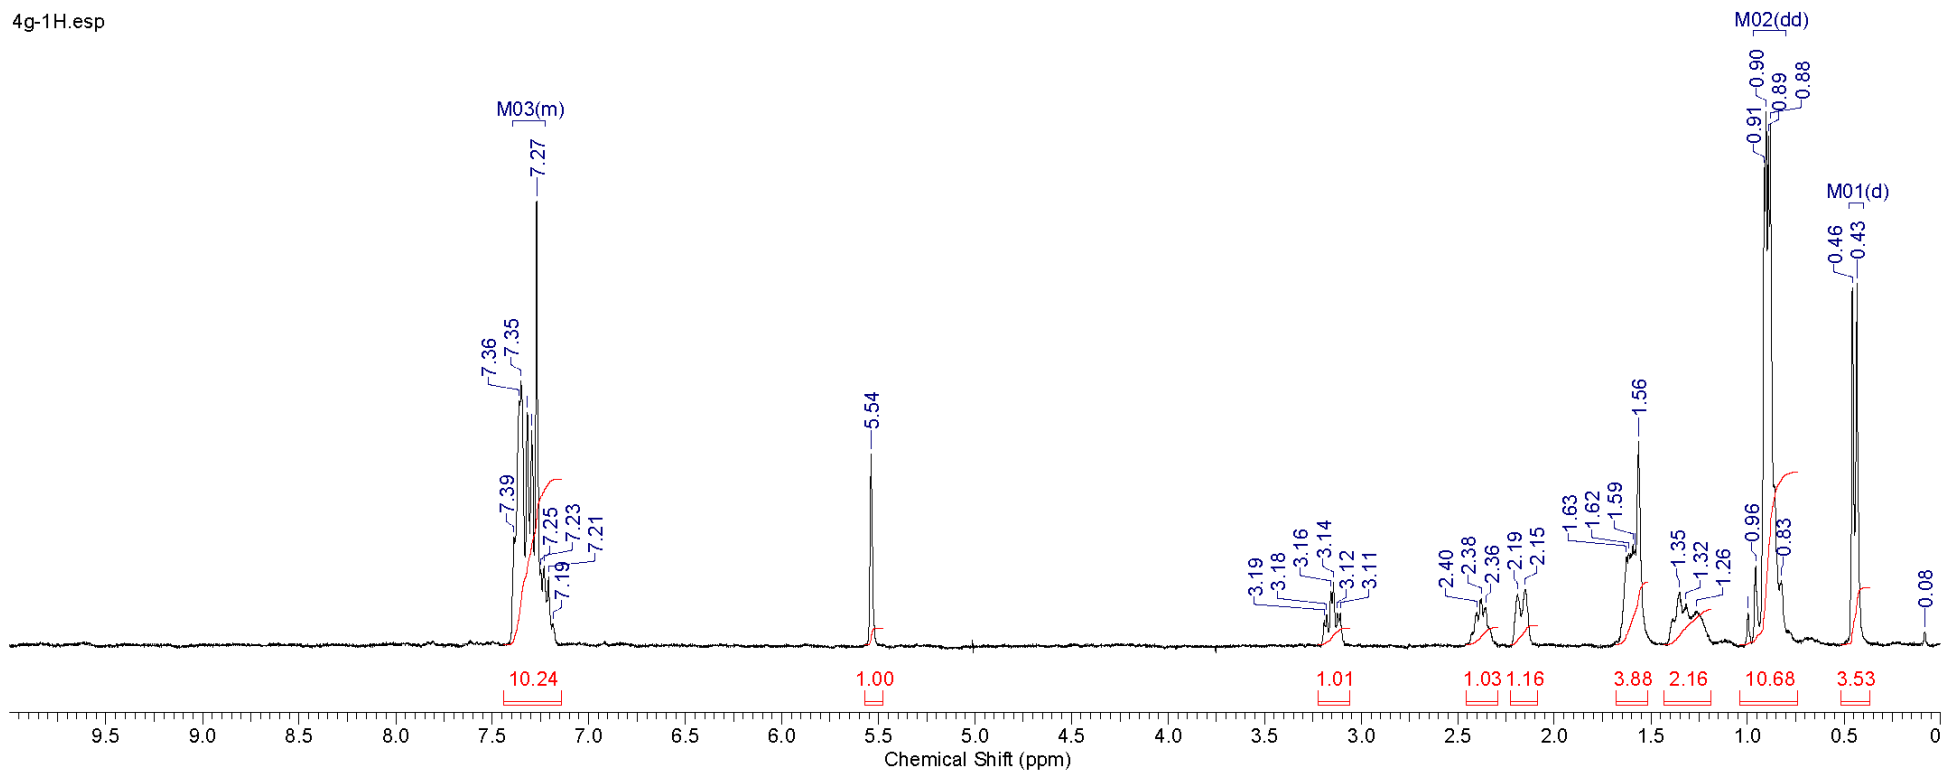

|                                                  |                    |
|--------------------------------------------------|--------------------|
| <b>Formula</b> C <sub>23</sub> H <sub>30</sub> O | <b>FW</b> 322.4837 |
|--------------------------------------------------|--------------------|

|                                                                                    |                                 |                                    |                                                   |
|------------------------------------------------------------------------------------|---------------------------------|------------------------------------|---------------------------------------------------|
| <b>Acquisition Time (sec)</b> 1.8150                                               | <b>Comment</b> CC29-13C         | <b>Date</b> Oct 6 2011             | <b>Date Stamp</b> Oct 6 2011                      |
| <b>File Name</b> C:\Users\User\Documents\PhD\PhD NMR data\CCclean\CC29-13C.fid\fid |                                 | <b>Frequency (MHz)</b> 75.46       |                                                   |
| <b>Nucleus</b> 13C                                                                 | <b>Number of Transients</b> 276 | <b>Original Points Count</b> 34053 | <b>Points Count</b> 65536                         |
| <b>Pulse Sequence</b> s2pul                                                        | <b>Receiver Gain</b> 30.00      | <b>Solvent</b> CHLOROFORM-d        |                                                   |
| <b>Spectrum Offset (Hz)</b> 7526.7744                                              | <b>Spectrum Type</b> STANDARD   | <b>Sweep Width (Hz)</b> 18761.73   | <b>Temperature (degree C)</b> AMBIENT TEMPERATURE |



4g-13C.esp

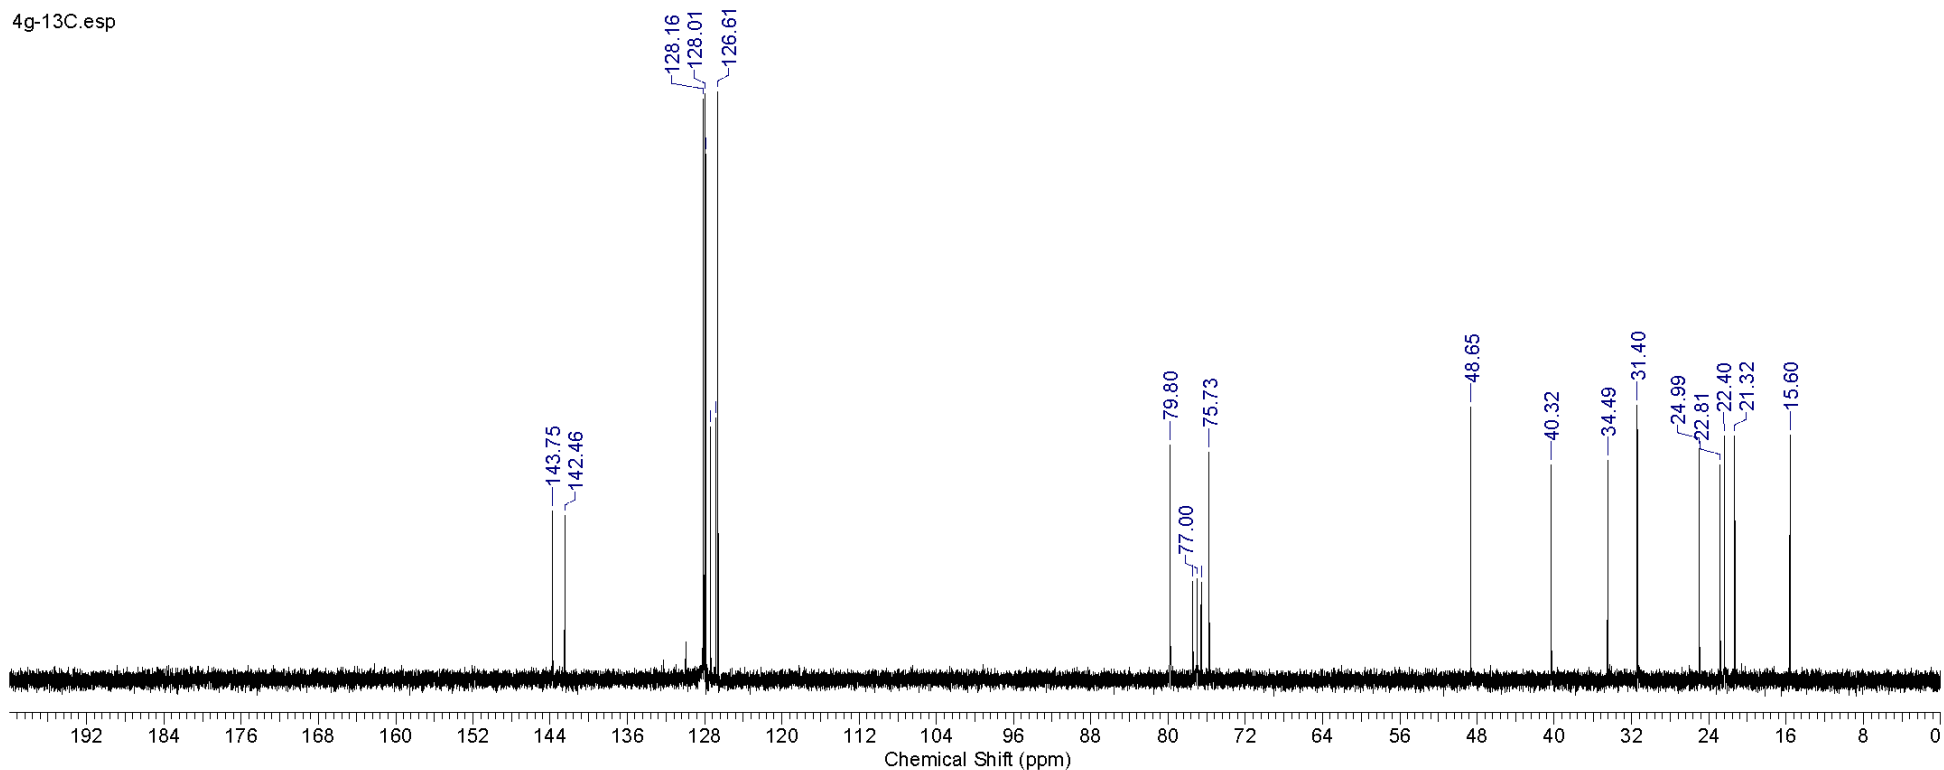

Formula C<sub>19</sub>H<sub>16</sub>O FW 260.3297

|                        |                                           |                       |         |                        |                      |                      |                      |
|------------------------|-------------------------------------------|-----------------------|---------|------------------------|----------------------|----------------------|----------------------|
| Acquisition Time (sec) | 3.9846                                    | Comment               | CC45-1H | Date                   | 28 Oct 2010 13:31:12 | Date Stamp           | 28 Oct 2010 13:31:12 |
| File Name              | C:\Users\User\Desktop\adam\nmr\CC45\1\fid | Frequency (MHz)       | 400.17  | Nucleus                | 1H                   | Number of Transients | 16                   |
| Origin                 | spect                                     | Original Points Count | 32768   | Owner                  | nmrsu                | Points Count         | 32768                |
| Receiver Gain          | 36.00                                     | SW(cyclical) (Hz)     | 8223.68 | Solvent                | CHLOROFORM-d         | Spectrum Offset (Hz) | 2457.4846            |
| Spectrum Type          | STANDARD                                  | Sweep Width (Hz)      | 8223.43 | Temperature (degree C) | 23.300               |                      |                      |

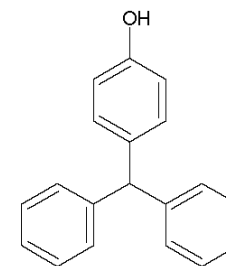

4h-1H.esp

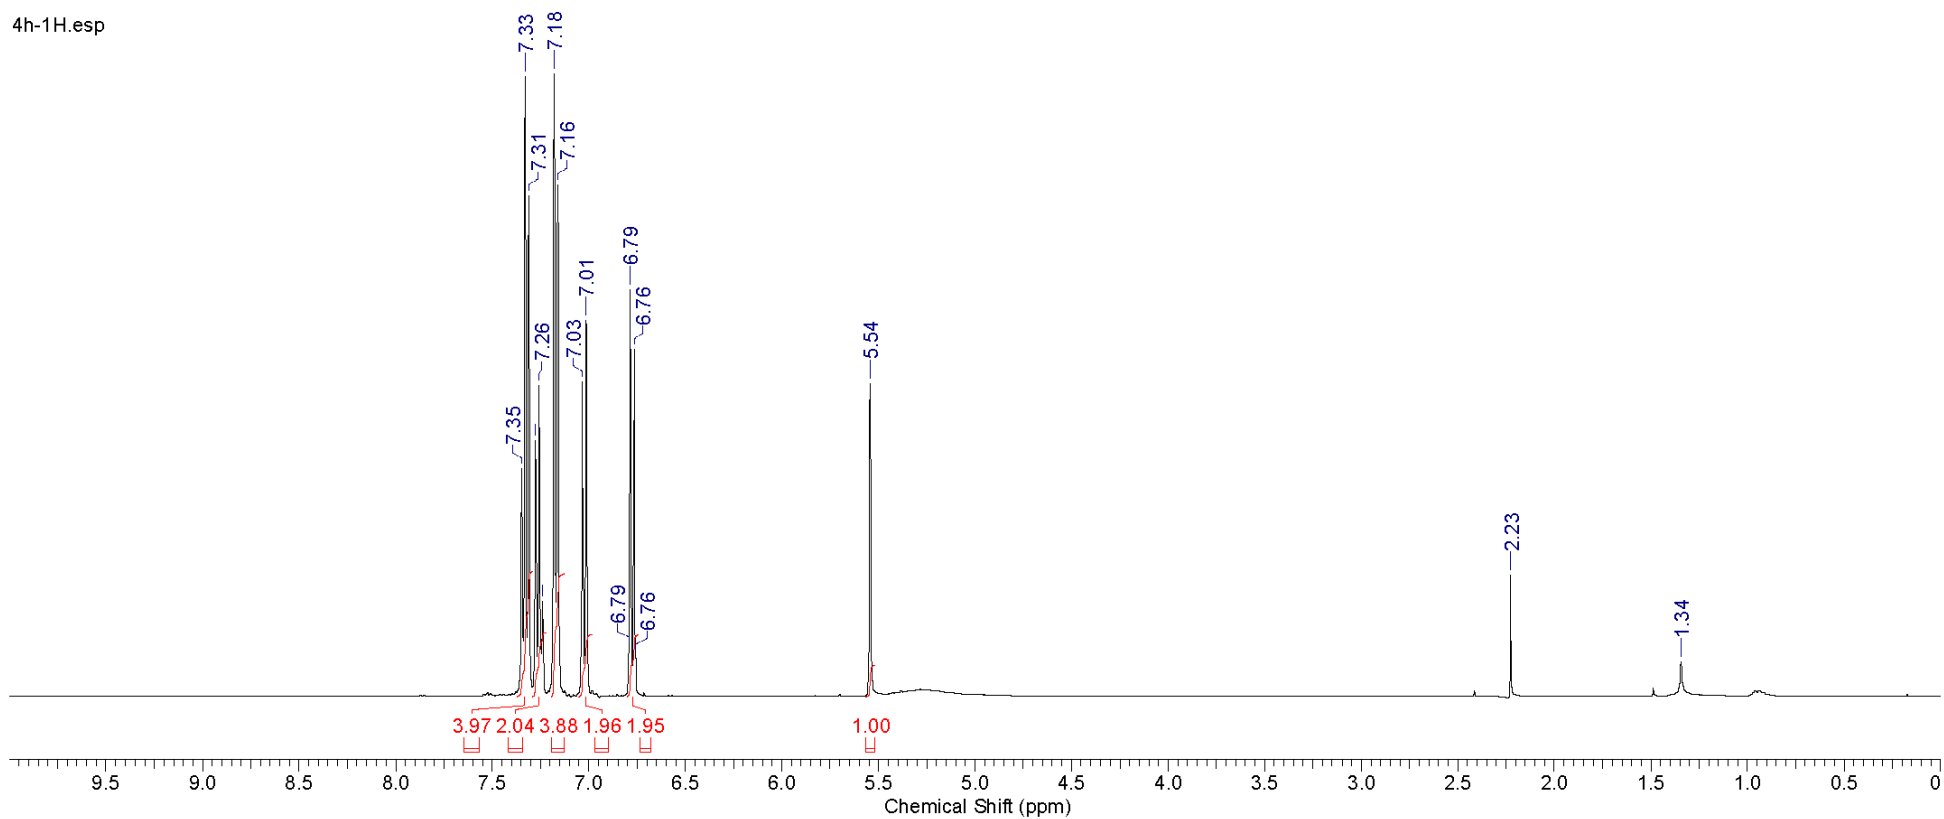

Formula  $C_{19}H_{16}O$  FW 260.3297

|                        |                                           |                       |          |                        |                      |                      |                      |
|------------------------|-------------------------------------------|-----------------------|----------|------------------------|----------------------|----------------------|----------------------|
| Acquisition Time (sec) | 1.3631                                    | Comment               | CC45-13C | Date                   | 28 Oct 2010 13:58:56 | Date Stamp           | 28 Oct 2010 13:58:56 |
| File Name              | C:\Users\User\Desktop\adam\nmr\CC45\2\fid | Frequency (MHz)       | 100.62   | Nucleus                | $^{13}C$             | Number of Transients | 450                  |
| Origin                 | spect                                     | Original Points Count | 32768    | Owner                  | nmsu                 | Points Count         | 32768                |
| Receiver Gain          | 128.00                                    | SW(cyclical) (Hz)     | 24038.46 | Solvent                | CHLOROFORM-d         | Pulse Sequence       | zgif30               |
| Spectrum Type          | STANDARD                                  | Sweep Width (Hz)      | 24037.73 | Temperature (degree C) | 23.800               | Spectrum Offset (Hz) | 10045.2051           |

4h-13C.esp

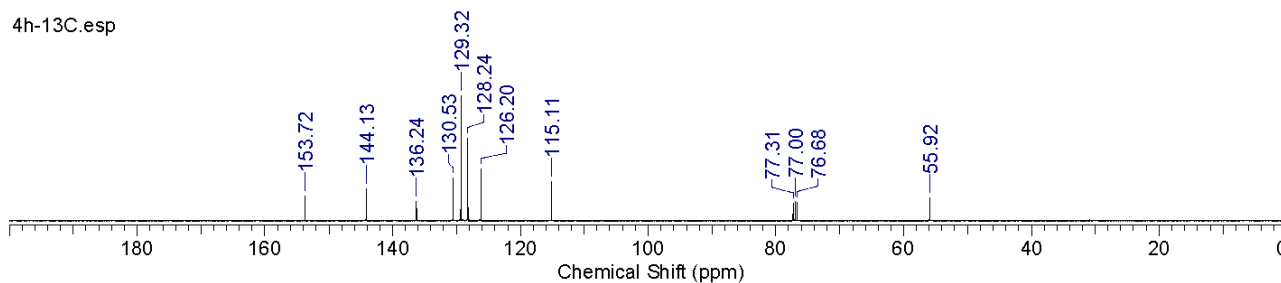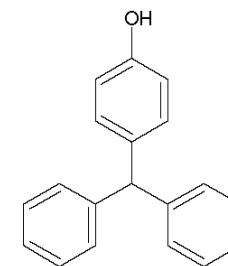

4h-13C.esp

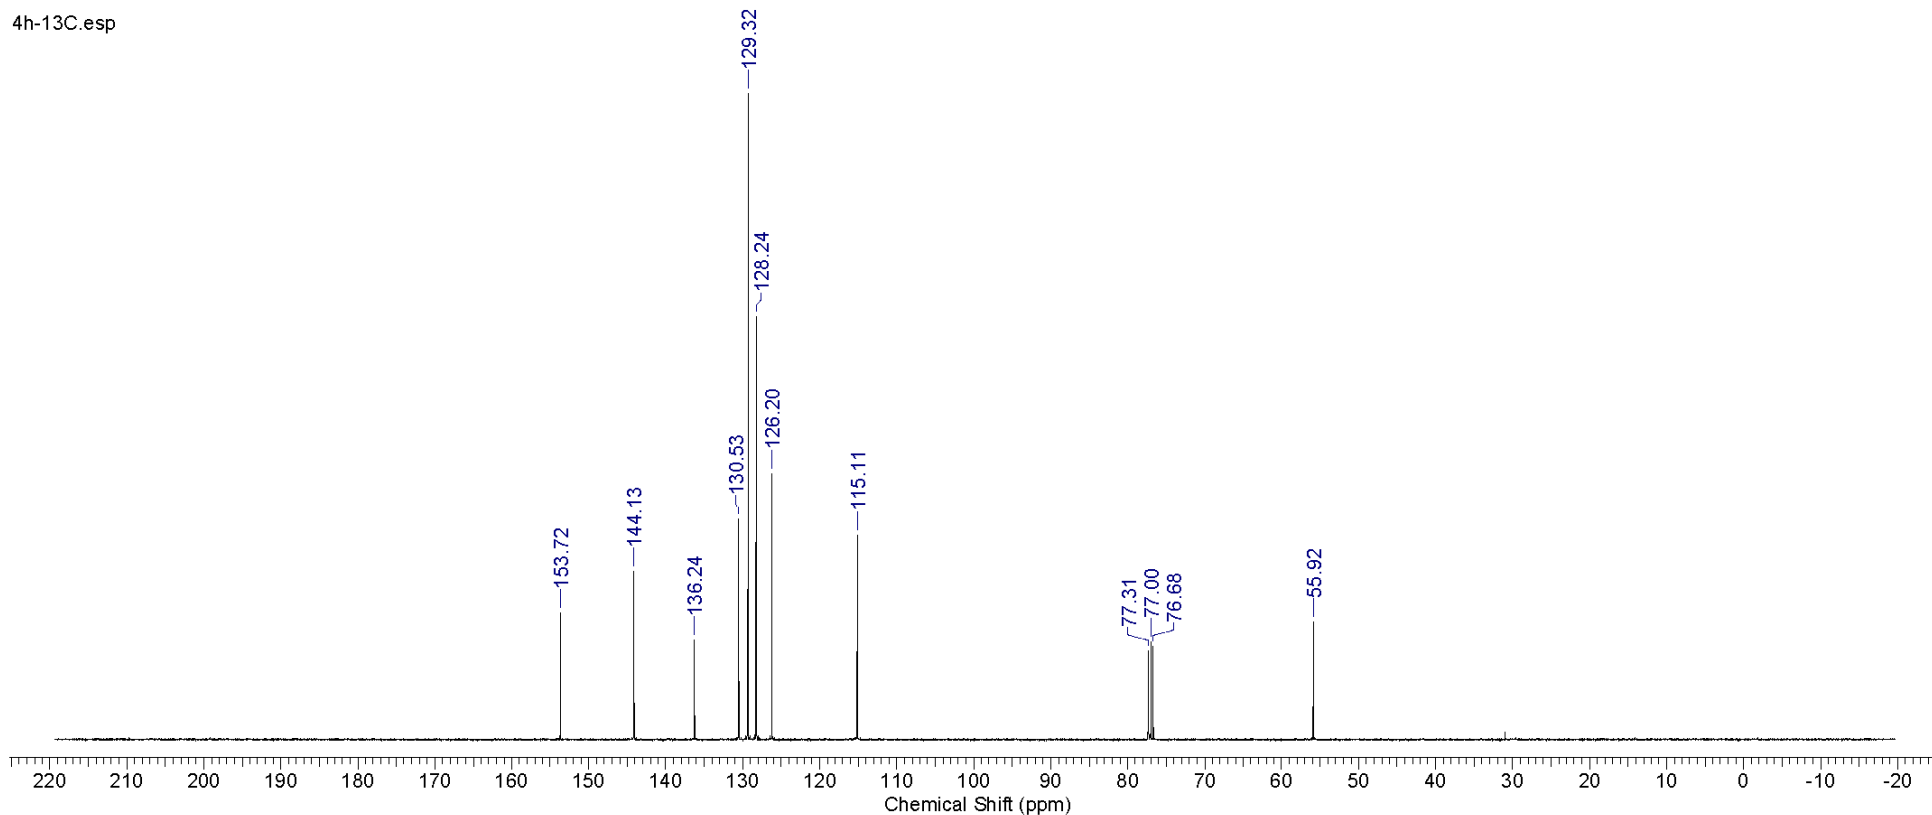



Formula C<sub>23</sub>H<sub>16</sub>O FW 310.3884

|                        |                                           |                       |         |                        |                      |                      |                      |
|------------------------|-------------------------------------------|-----------------------|---------|------------------------|----------------------|----------------------|----------------------|
| Acquisition Time (sec) | 3.9846                                    | Comment               | CC44-1H | Date                   | 28 Oct 2010 15:56:16 | Date Stamp           | 28 Oct 2010 15:56:16 |
| File Name              | C:\Users\User\Desktop\adam\nmr\CC44\1\fid | Frequency (MHz)       | 400.17  | Nucleus                | 1H                   | Number of Transients | 16                   |
| Origin                 | spect                                     | Original Points Count | 32768   | Owner                  | nmsu                 | Points Count         | 32768                |
| Receiver Gain          | 18.00                                     | SW(cyclical) (Hz)     | 8223.68 | Solvent                | CHLOROFORM-d         | Spectrum Offset (Hz) | 2455.6116            |
| Spectrum Type          | STANDARD                                  | Sweep Width (Hz)      | 8223.43 | Temperature (degree C) | 24.500               |                      |                      |

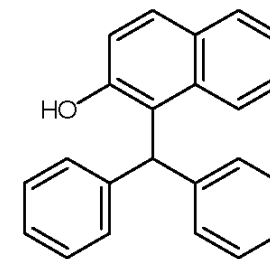

4i-1H.esp

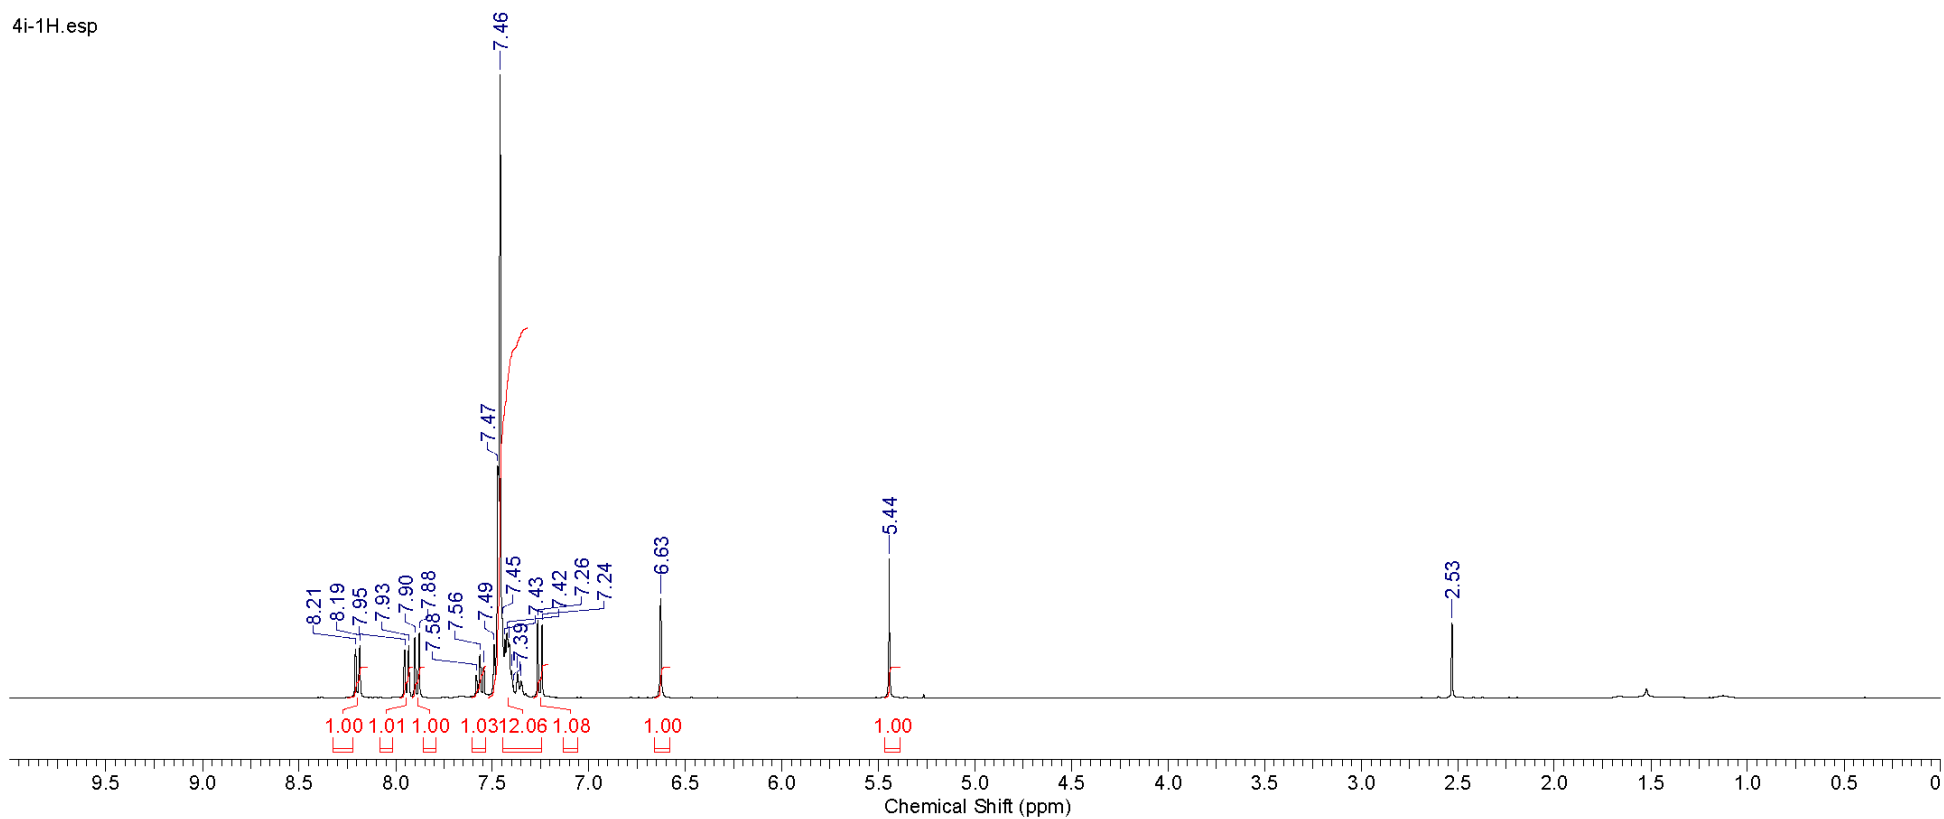

Formula C<sub>21</sub>H<sub>17</sub>N FW 283.3664

|                        |                                           |                       |         |                        |                      |                      |                      |
|------------------------|-------------------------------------------|-----------------------|---------|------------------------|----------------------|----------------------|----------------------|
| Acquisition Time (sec) | 3.9846                                    | Comment               | CC46-1H | Date                   | 01 Nov 2010 15:00:48 | Date Stamp           | 01 Nov 2010 15:00:48 |
| File Name              | C:\Users\User\Desktop\adam\nmr\CC46\1\fid | Frequency (MHz)       | 400.17  | Nucleus                | 1H                   | Number of Transients | 16                   |
| Origin                 | spect                                     | Original Points Count | 32768   | Owner                  | nmsu                 | Points Count         | 32768                |
| Receiver Gain          | 50.80                                     | SW(cyclical) (Hz)     | 8223.68 | Solvent                | CHLOROFORM-d         | Spectrum Offset (Hz) | 2455.3635            |
| Spectrum Type          | STANDARD                                  | Sweep Width (Hz)      | 8223.43 | Temperature (degree C) | 23.500               |                      |                      |

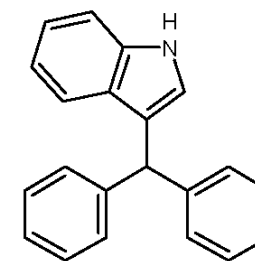

4j-1H.esp

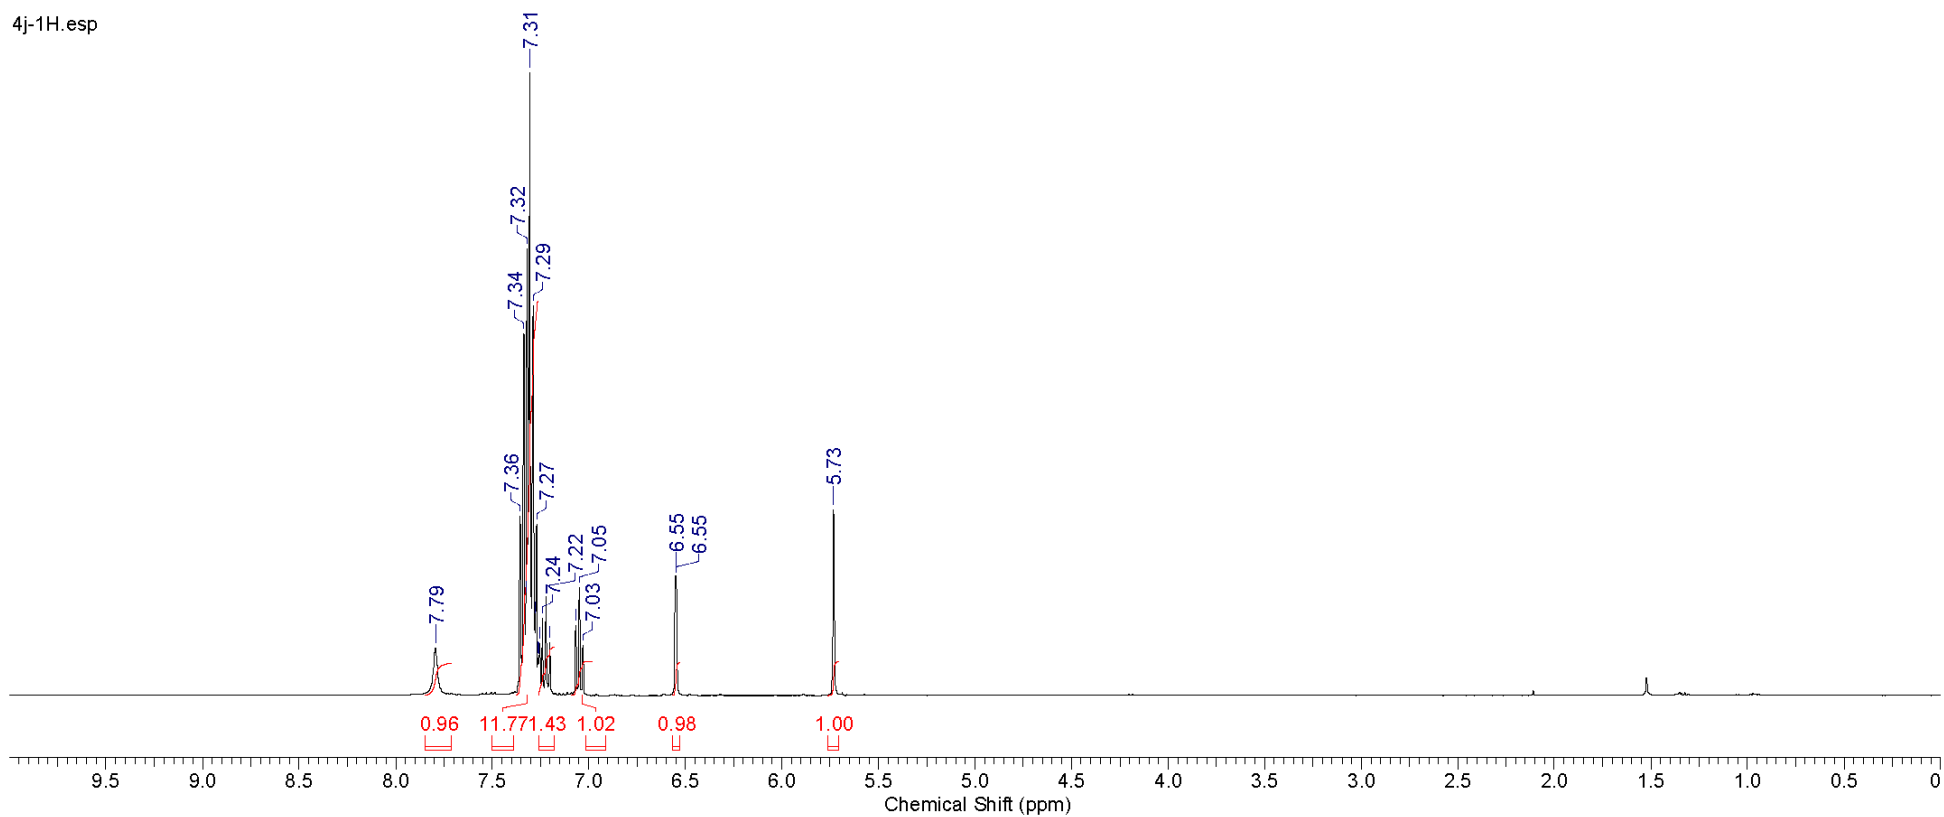

Formula C<sub>21</sub>H<sub>17</sub>N FW 283.3664

|                        |                                           |                       |          |                        |                      |                      |                      |
|------------------------|-------------------------------------------|-----------------------|----------|------------------------|----------------------|----------------------|----------------------|
| Acquisition Time (sec) | 1.3631                                    | Comment               | CC46-13C | Date                   | 01 Nov 2010 15:24:16 | Date Stamp           | 01 Nov 2010 15:24:16 |
| File Name              | C:\Users\User\Desktop\adam\nmr\CC46\2\fid | Frequency (MHz)       | 100.62   | Nucleus                | 13C                  | Number of Transients | 400                  |
| Origin                 | spect                                     | Original Points Count | 32768    | Owner                  | nmsu                 | Points Count         | 32768                |
| Receiver Gain          | 114.00                                    | SW(cyclical) (Hz)     | 24038.46 | Solvent                | CHLOROFORM-d         | Spectrum Offset (Hz) | 10045.9463           |
| Spectrum Type          | STANDARD                                  | Sweep Width (Hz)      | 24037.73 | Temperature (degree C) | 24.000               |                      |                      |



4j-13C.esp

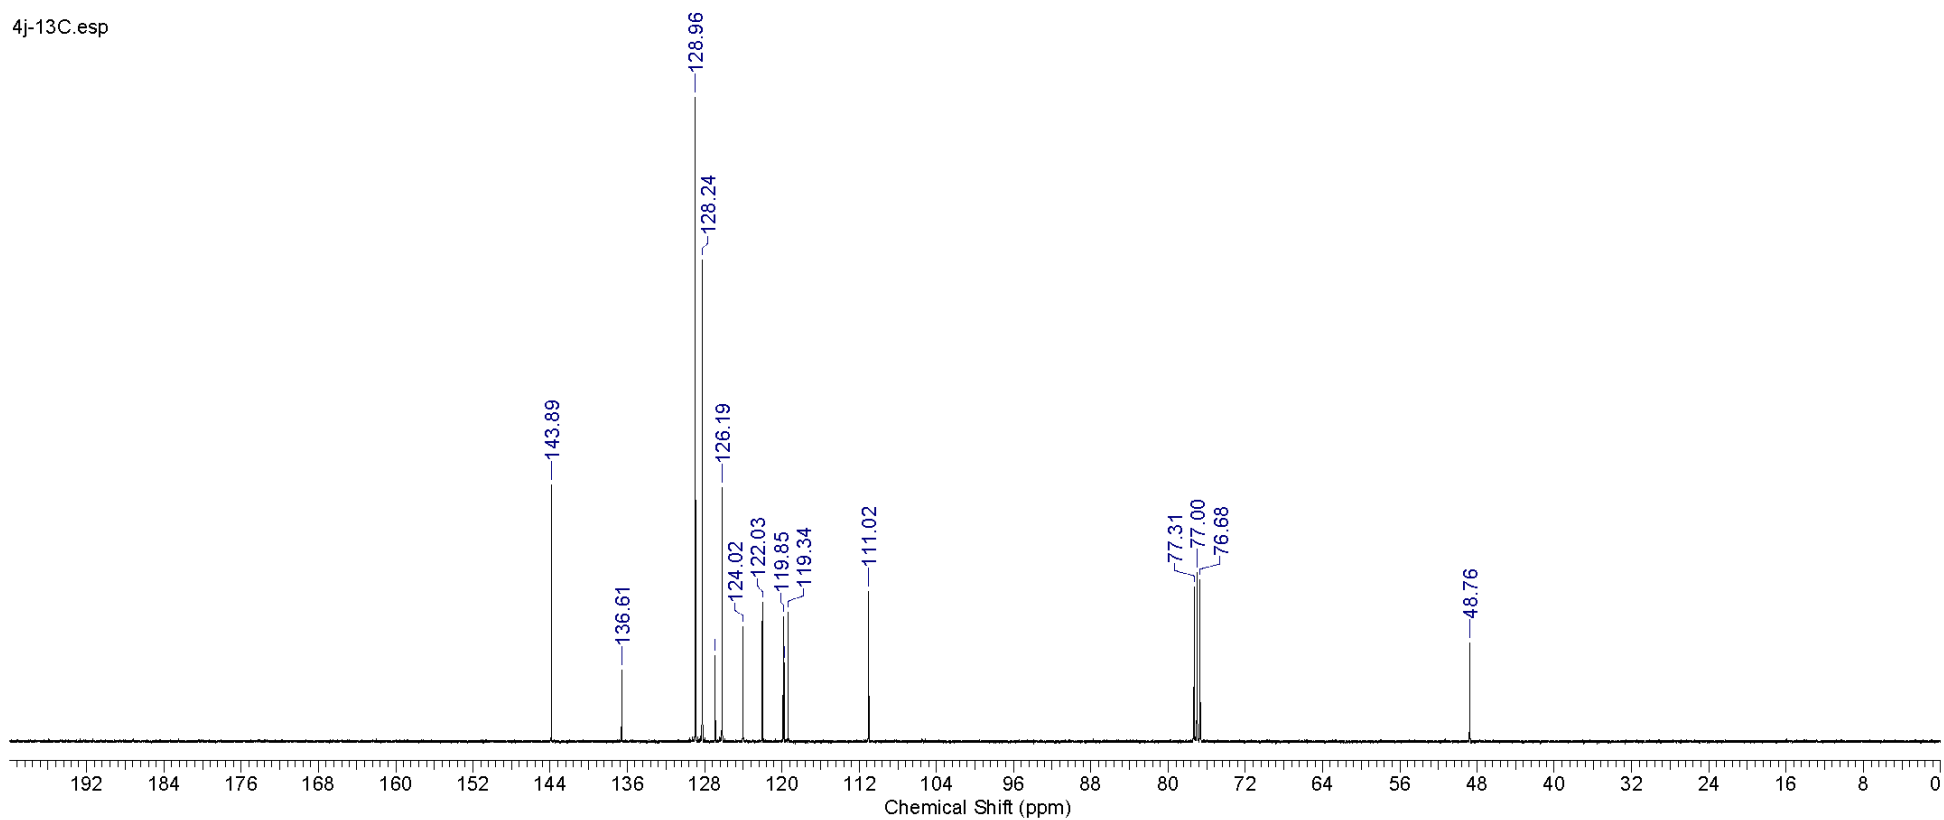

Formula C<sub>22</sub>H<sub>26</sub>O<sub>6</sub> FW 370.4388

|                        |                                                                            |                      |          |                       |                 |                        |                     |
|------------------------|----------------------------------------------------------------------------|----------------------|----------|-----------------------|-----------------|------------------------|---------------------|
| Acquisition Time (sec) | 2.0000                                                                     | Comment              | CC23-1H  | Date                  | Oct 8 2011      | Date Stamp             | Oct 8 2011          |
| File Name              | C:\Users\User\Documents\PhD\Green chem article\NMR data\4k\CC23-1H.fid\fid |                      |          |                       | Frequency (MHz) | 300.08                 |                     |
| Nucleus                | 1H                                                                         | Number of Transients | 4        | Original Points Count | 9600            | Points Count           | 131072              |
| Pulse Sequence         | s2pul                                                                      | Receiver Gain        | 3.00     | Solvent               | CHLOROFORM-d    |                        |                     |
| Spectrum Offset (Hz)   | 1493.8297                                                                  | Spectrum Type        | STANDARD | Sweep Width (Hz)      | 4800.00         | Temperature (degree C) | AMBIENT TEMPERATURE |

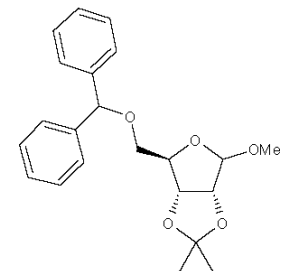

4k-1H.esp

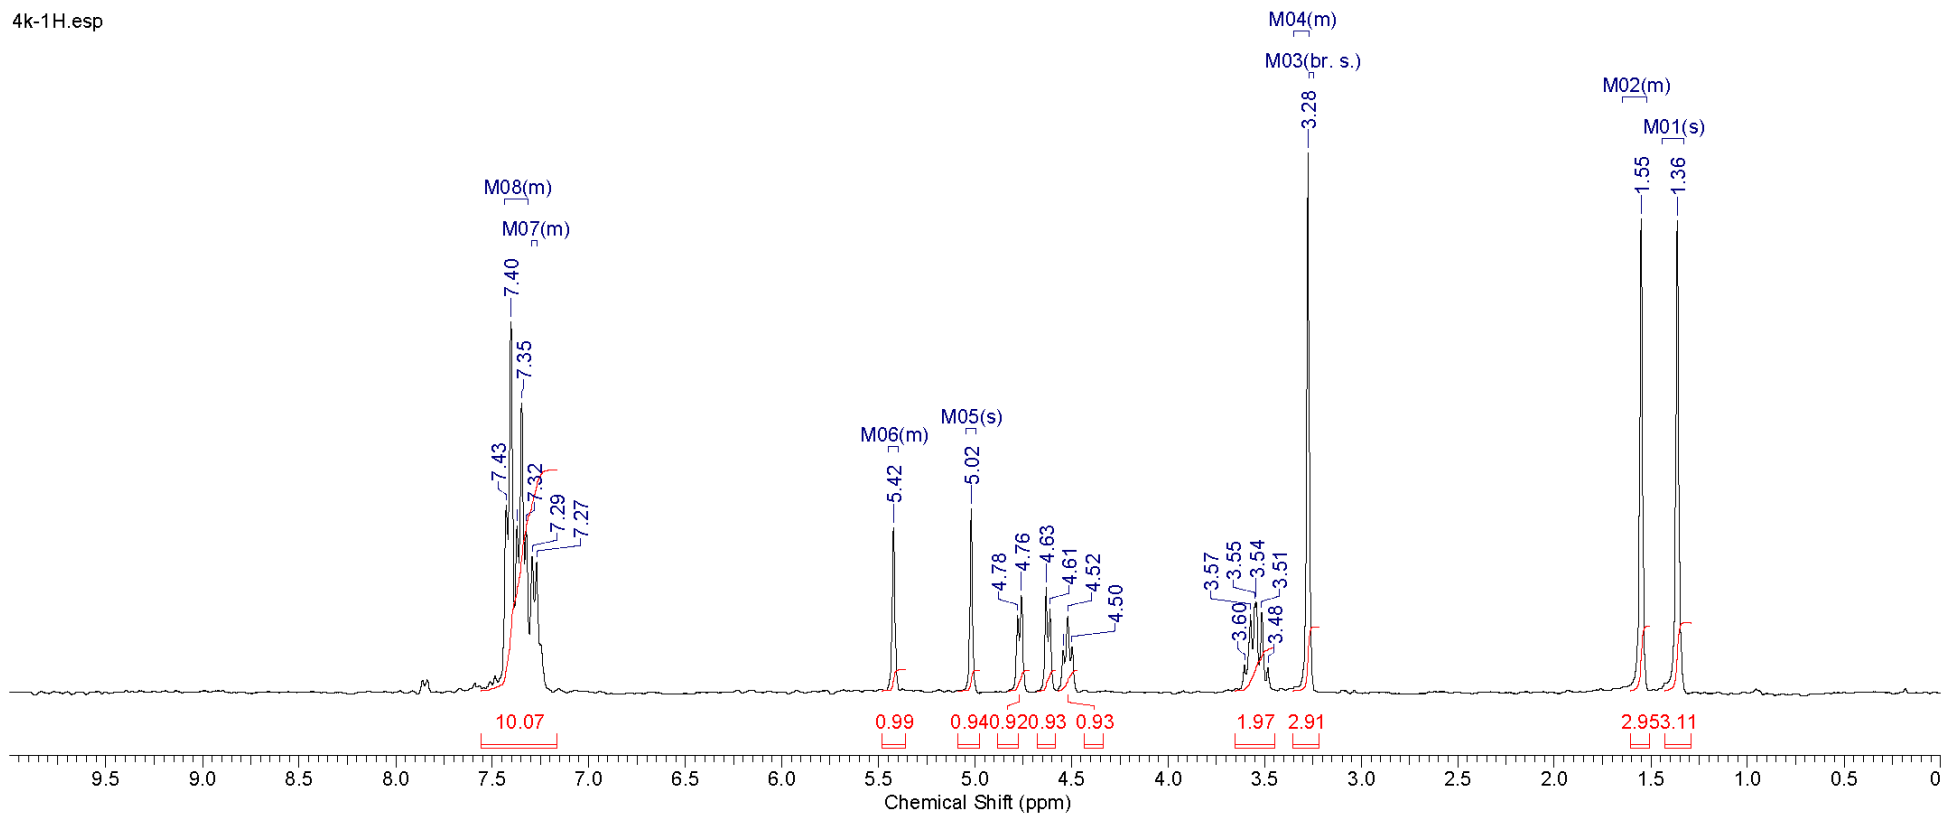

Formula  $C_{22}H_{26}O_6$  FW 370.4388

|                        |                                                                             |                      |          |                       |              |                        |                     |
|------------------------|-----------------------------------------------------------------------------|----------------------|----------|-----------------------|--------------|------------------------|---------------------|
| Acquisition Time (sec) | 1.8150                                                                      | Comment              | CC23-13C | Date                  | Oct 8 2011   | Date Stamp             | Oct 8 2011          |
| File Name              | C:\Users\User\Documents\PhD\Green chem article\NMR data\4k\CC23-13C.fid\fid |                      |          | Frequency (MHz)       | 75.46        |                        |                     |
| Nucleus                | 13C                                                                         | Number of Transients | 5080     | Original Points Count | 34053        | Points Count           | 65536               |
| Pulse Sequence         | s2pul                                                                       | Receiver Gain        | 29.00    | Solvent               | CHLOROFORM-d |                        |                     |
| Spectrum Offset (Hz)   | 7525.9155                                                                   | Spectrum Type        | STANDARD | Sweep Width (Hz)      | 18761.73     | Temperature (degree C) | AMBIENT TEMPERATURE |

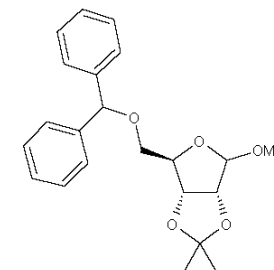

4k-13C.esp

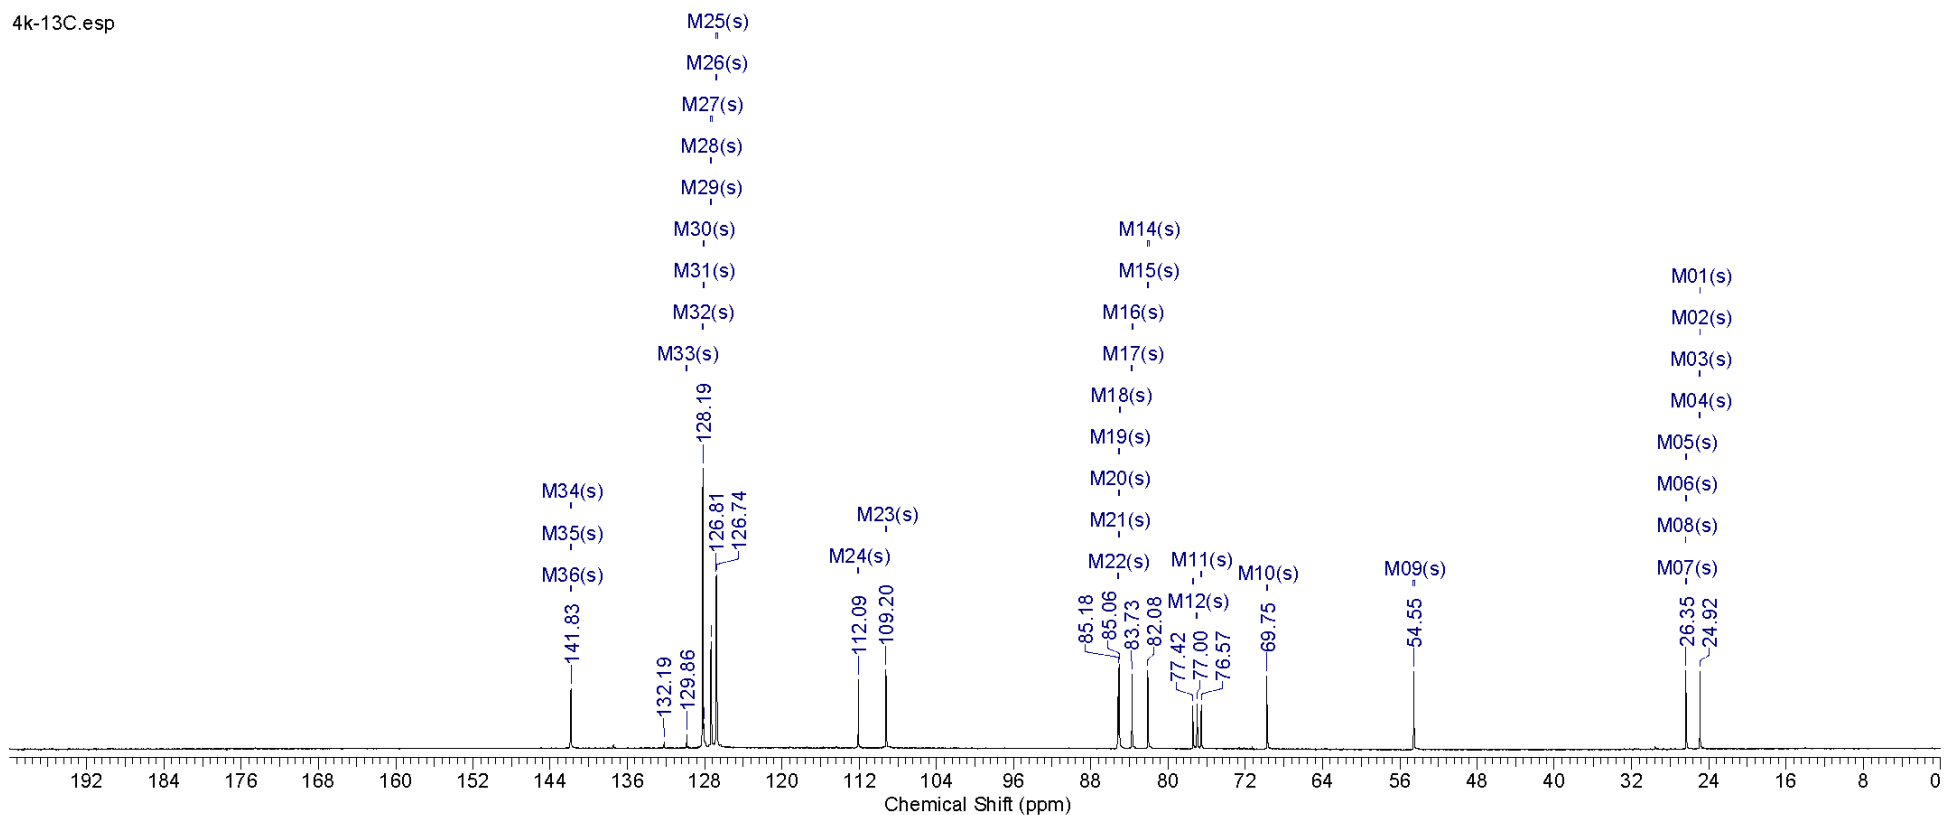

Formula C<sub>18</sub>H<sub>14</sub>O FW 184.2338

|                        |                                                     |               |          |                  |             |                        |                     |                      |              |
|------------------------|-----------------------------------------------------|---------------|----------|------------------|-------------|------------------------|---------------------|----------------------|--------------|
| Acquisition Time (sec) | 2.0000                                              | Comment       | CC148-1H | Date             | Jul 28 2011 | Date Stamp             | Jul 28 2011         |                      |              |
| File Name              | C:\Users\User\Desktop\adam\CCclean\CC148-1H.fid\fid |               |          | Frequency (MHz)  | 300.08      | Nucleus                | 1H                  | Number of Transients | 4            |
| Original Points Count  | 9600                                                | Points Count  | 16384    | Pulse Sequence   | s2pul       | Receiver Gain          | 9.00                | Solvent              | CHLOROFORM-d |
| Spectrum Offset (Hz)   | 1497.0046                                           | Spectrum Type | STANDARD | Sweep Width (Hz) | 4800.00     | Temperature (degree C) | AMBIENT TEMPERATURE |                      |              |

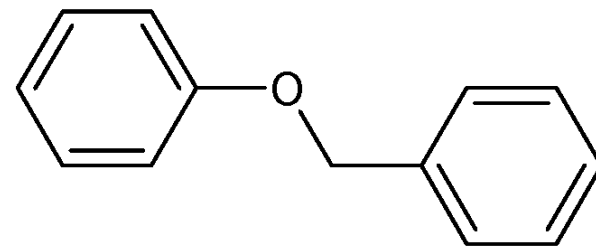

5a-1H.esp

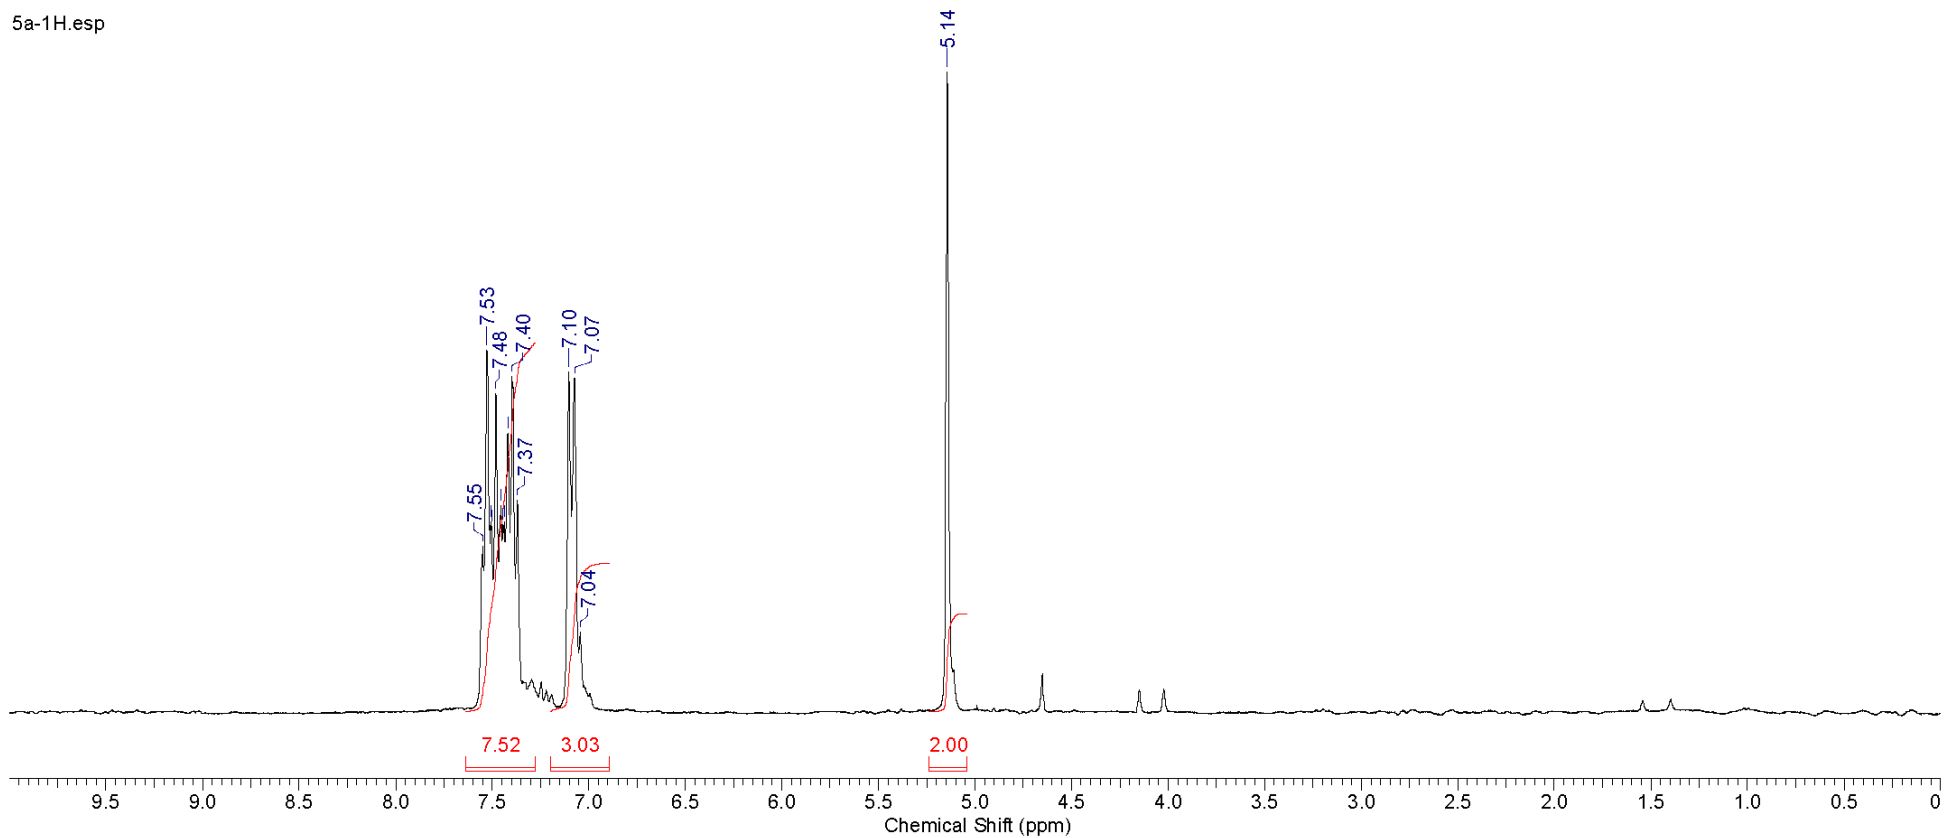

Formula C<sub>18</sub>H<sub>12</sub>O FW 184.2338

|                        |                                                      |              |           |                      |             |               |             |                      |          |
|------------------------|------------------------------------------------------|--------------|-----------|----------------------|-------------|---------------|-------------|----------------------|----------|
| Acquisition Time (sec) | 1.8150                                               | Comment      | CC148-13C | Date                 | Jul 28 2011 | Date Stamp    | Jul 28 2011 |                      |          |
| File Name              | C:\Users\User\Desktop\adam\CCclean\CC148-13C.fid\fid |              |           | Frequency (MHz)      | 75.46       | Nucleus       | 13C         | Number of Transients | 60       |
| Original Points Count  | 34053                                                | Points Count | 65536     | Pulse Sequence       | s2pul       | Receiver Gain | 29.00       |                      |          |
| Solvent                | CHLOROFORM-d                                         |              |           | Spectrum Offset (Hz) | 7529.9233   | Spectrum Type | STANDARD    | Sweep Width (Hz)     | 18761.73 |
| Temperature (degree C) | AMBIENT TEMPERATURE                                  |              |           |                      |             |               |             |                      |          |

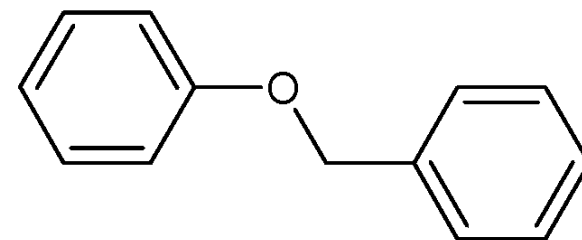

5a-13C.esp

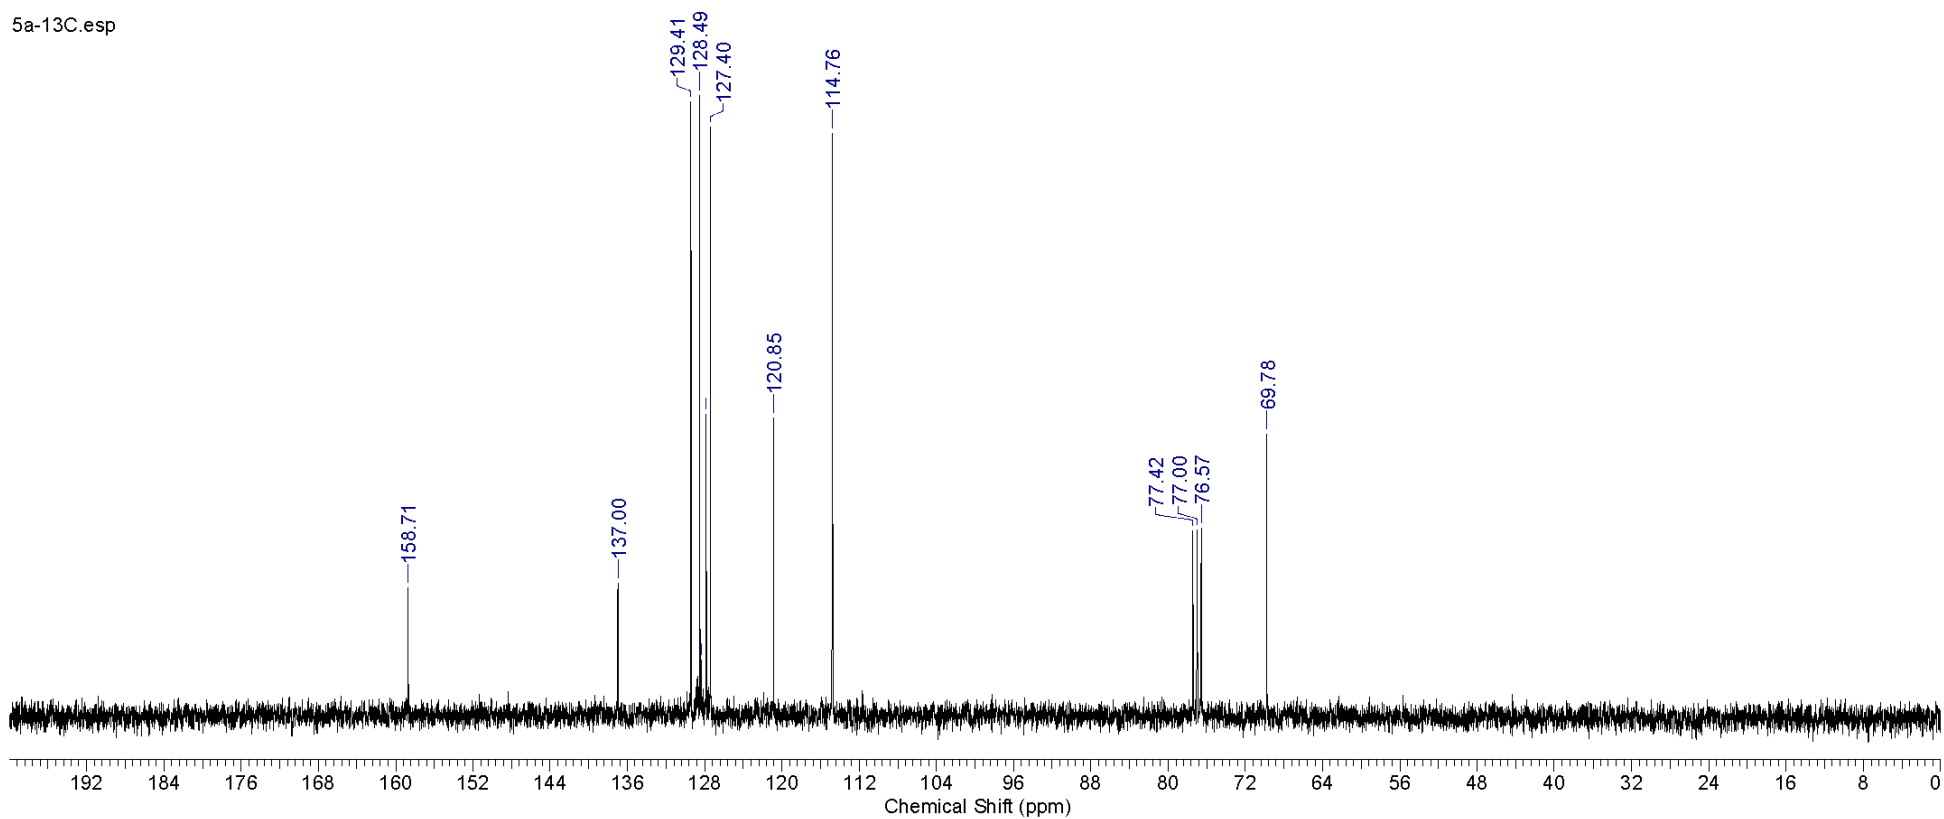

Formula C<sub>14</sub>H<sub>14</sub>O FW 198.2604

|                        |                                                     |               |          |                  |            |                        |                     |                      |              |
|------------------------|-----------------------------------------------------|---------------|----------|------------------|------------|------------------------|---------------------|----------------------|--------------|
| Acquisition Time (sec) | 2.0000                                              | Comment       | CC173-1H | Date             | Sep 8 2011 | Date Stamp             | Sep 8 2011          |                      |              |
| File Name              | C:\Users\User\Desktop\adam\CCclean\CC173-1H.fid\fid |               |          | Frequency (MHz)  | 300.08     | Nucleus                | 1H                  | Number of Transients | 4            |
| Original Points Count  | 9600                                                | Points Count  | 16384    | Pulse Sequence   | s2pul      | Receiver Gain          | 20.00               | Solvent              | CHLOROFORM-d |
| Spectrum Offset (Hz)   | 1495.6379                                           | Spectrum Type | STANDARD | Sweep Width (Hz) | 4800.00    | Temperature (degree C) | AMBIENT TEMPERATURE |                      |              |

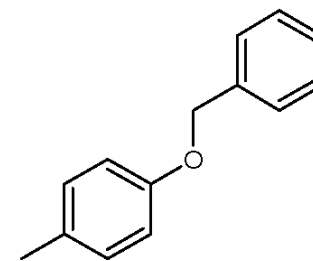

5b-1H.esp

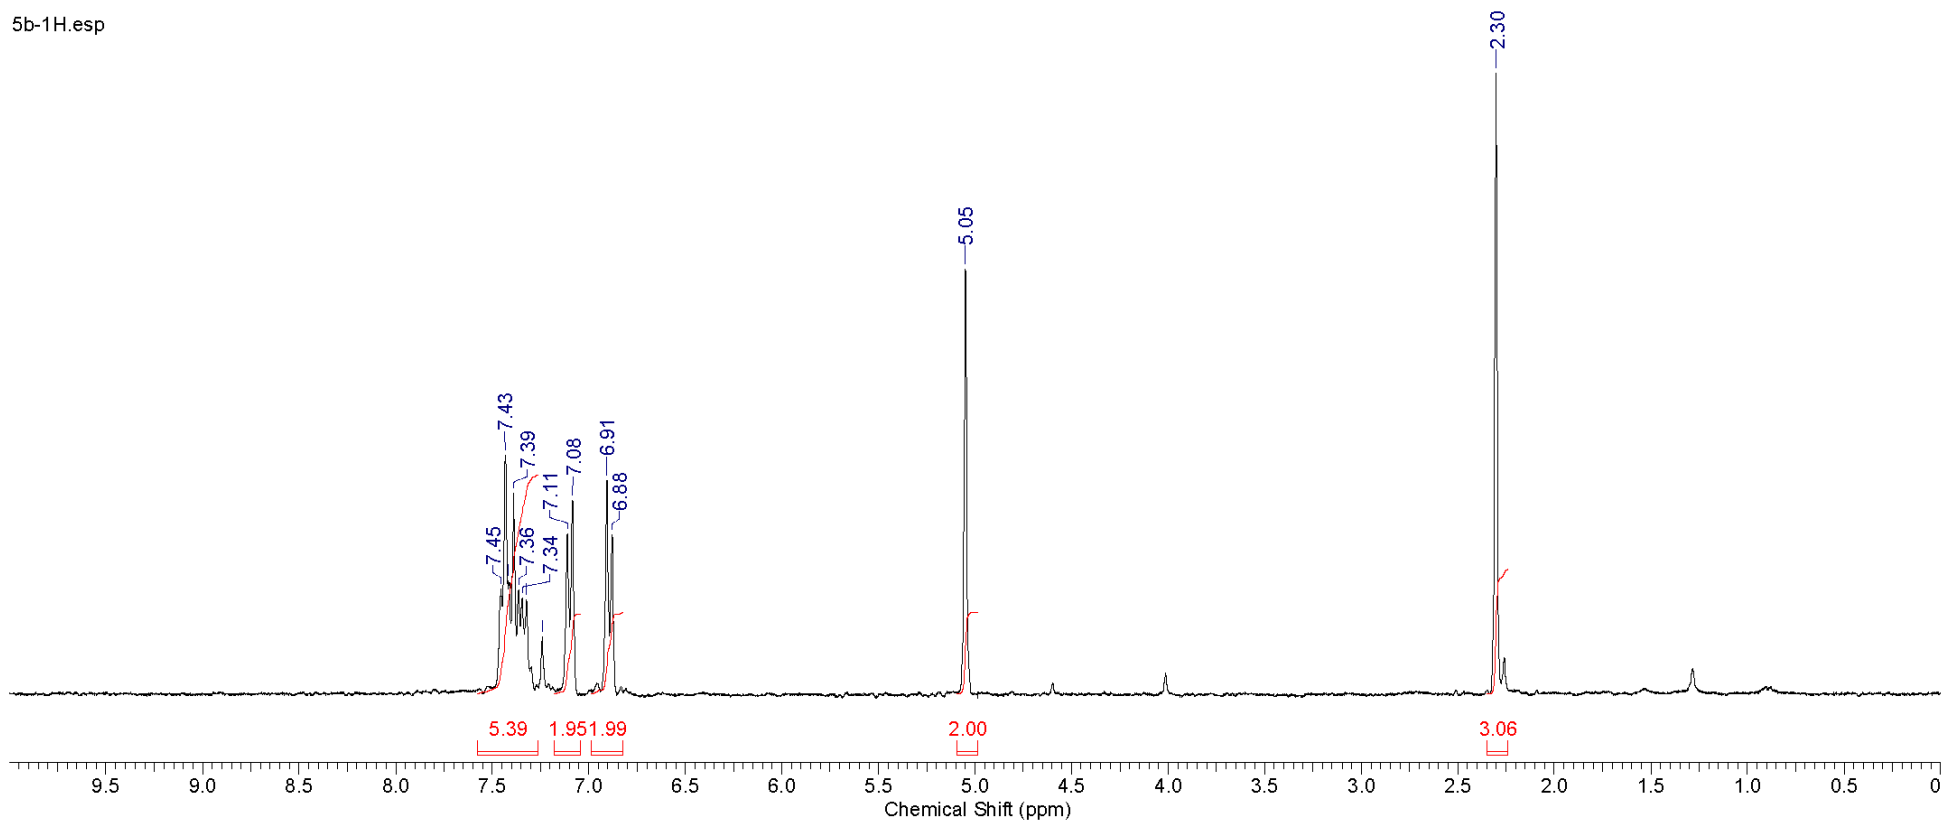



Formula C<sub>14</sub>H<sub>14</sub>O FW 198.2604

|                        |                                                      |              |           |                      |            |               |            |                      |          |
|------------------------|------------------------------------------------------|--------------|-----------|----------------------|------------|---------------|------------|----------------------|----------|
| Acquisition Time (sec) | 1.8150                                               | Comment      | CC173-13C | Date                 | Sep 8 2011 | Date Stamp    | Sep 8 2011 |                      |          |
| File Name              | C:\Users\User\Desktop\adam\CCclean\CC173-13C.fid\fid |              |           | Frequency (MHz)      | 75.46      | Nucleus       | 13C        | Number of Transients | 2700     |
| Original Points Count  | 34053                                                | Points Count | 65536     | Pulse Sequence       | s2pul      | Receiver Gain | 30.00      |                      |          |
| Solvent                | CHLOROFORM-d                                         |              |           | Spectrum Offset (Hz) | 7541.6602  | Spectrum Type | STANDARD   | Sweep Width (Hz)     | 18761.73 |
| Temperature (degree C) | AMBIENT TEMPERATURE                                  |              |           |                      |            |               |            |                      |          |

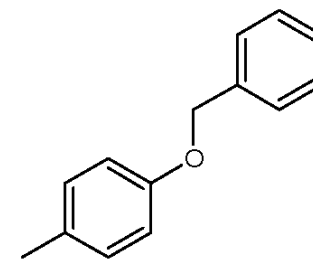

5b-13C.esp

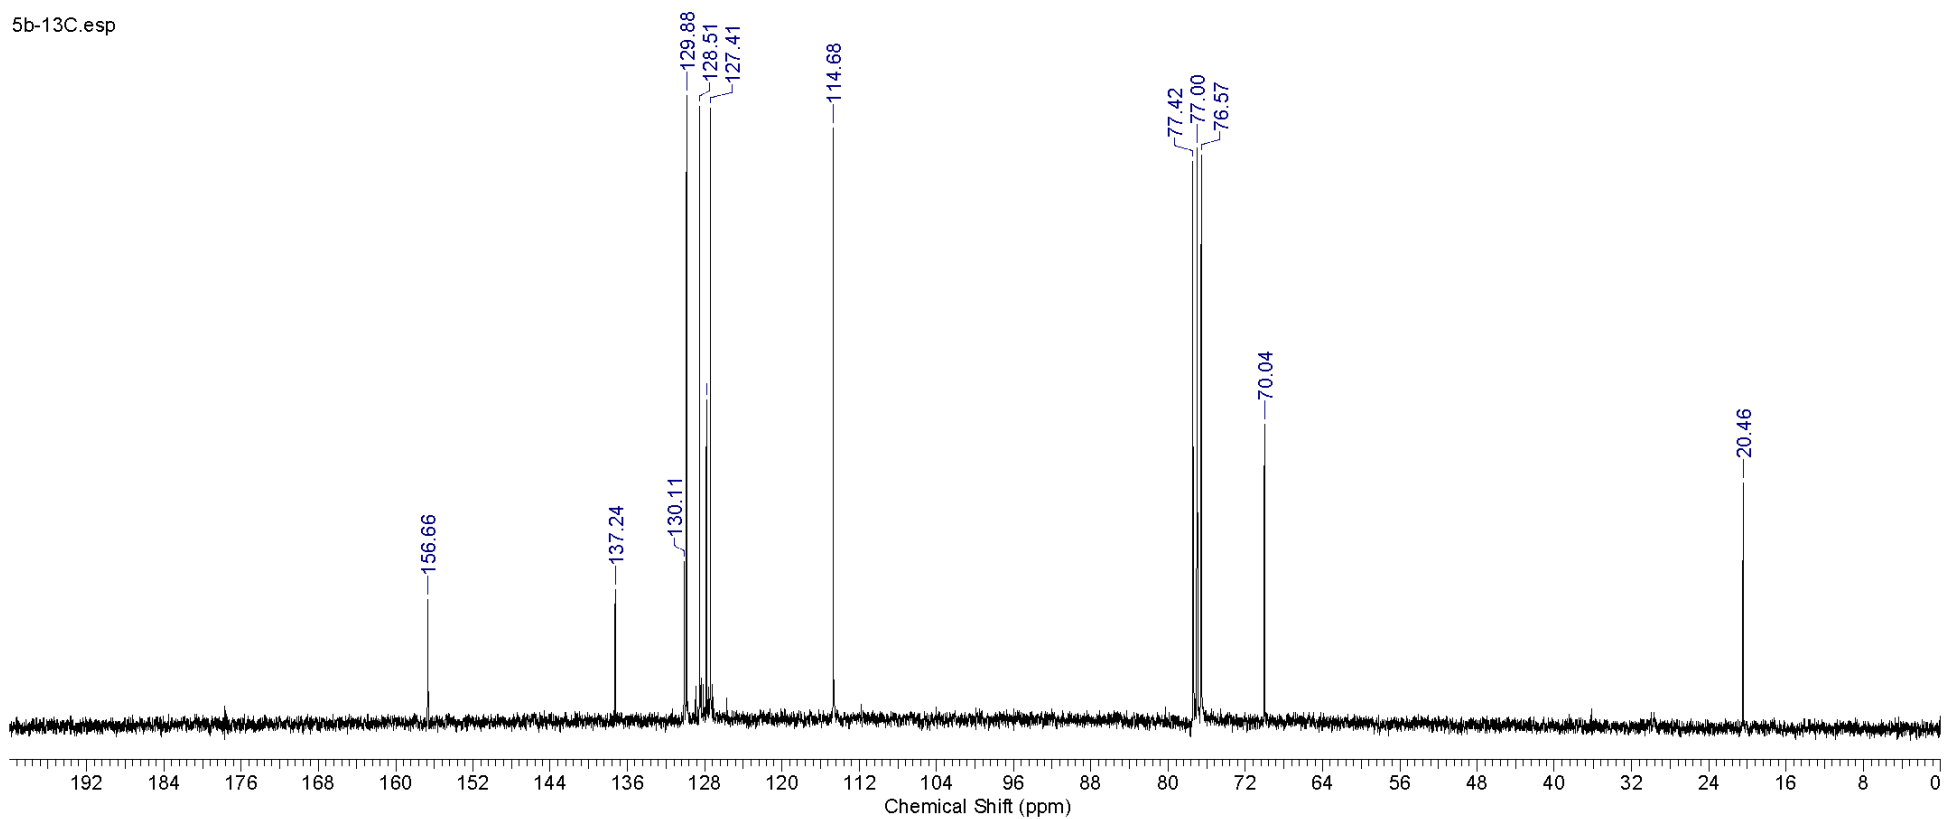

Formula C<sub>18</sub>H<sub>16</sub>O FW 184.2338

|                        |                                                     |               |          |                  |             |                        |                     |                      |              |
|------------------------|-----------------------------------------------------|---------------|----------|------------------|-------------|------------------------|---------------------|----------------------|--------------|
| Acquisition Time (sec) | 2.0000                                              | Comment       | CC152-1H | Date             | Sep 28 2011 | Date Stamp             | Sep 28 2011         |                      |              |
| File Name              | C:\Users\User\Desktop\adam\CCclean\CC152-1H.fid\fid |               |          | Frequency (MHz)  | 300.08      | Nucleus                | 1H                  | Number of Transients | 4            |
| Original Points Count  | 9600                                                | Points Count  | 16384    | Pulse Sequence   | s2pul       | Receiver Gain          | 7.00                | Solvent              | CHLOROFORM-d |
| Spectrum Offset (Hz)   | 1496.5173                                           | Spectrum Type | STANDARD | Sweep Width (Hz) | 4800.00     | Temperature (degree C) | AMBIENT TEMPERATURE |                      |              |

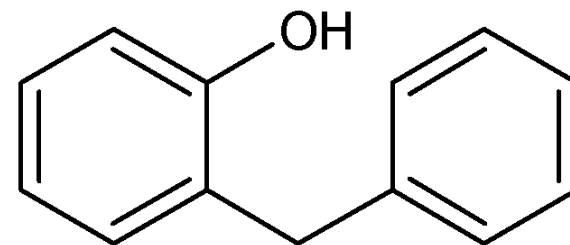

6a-1H.esp

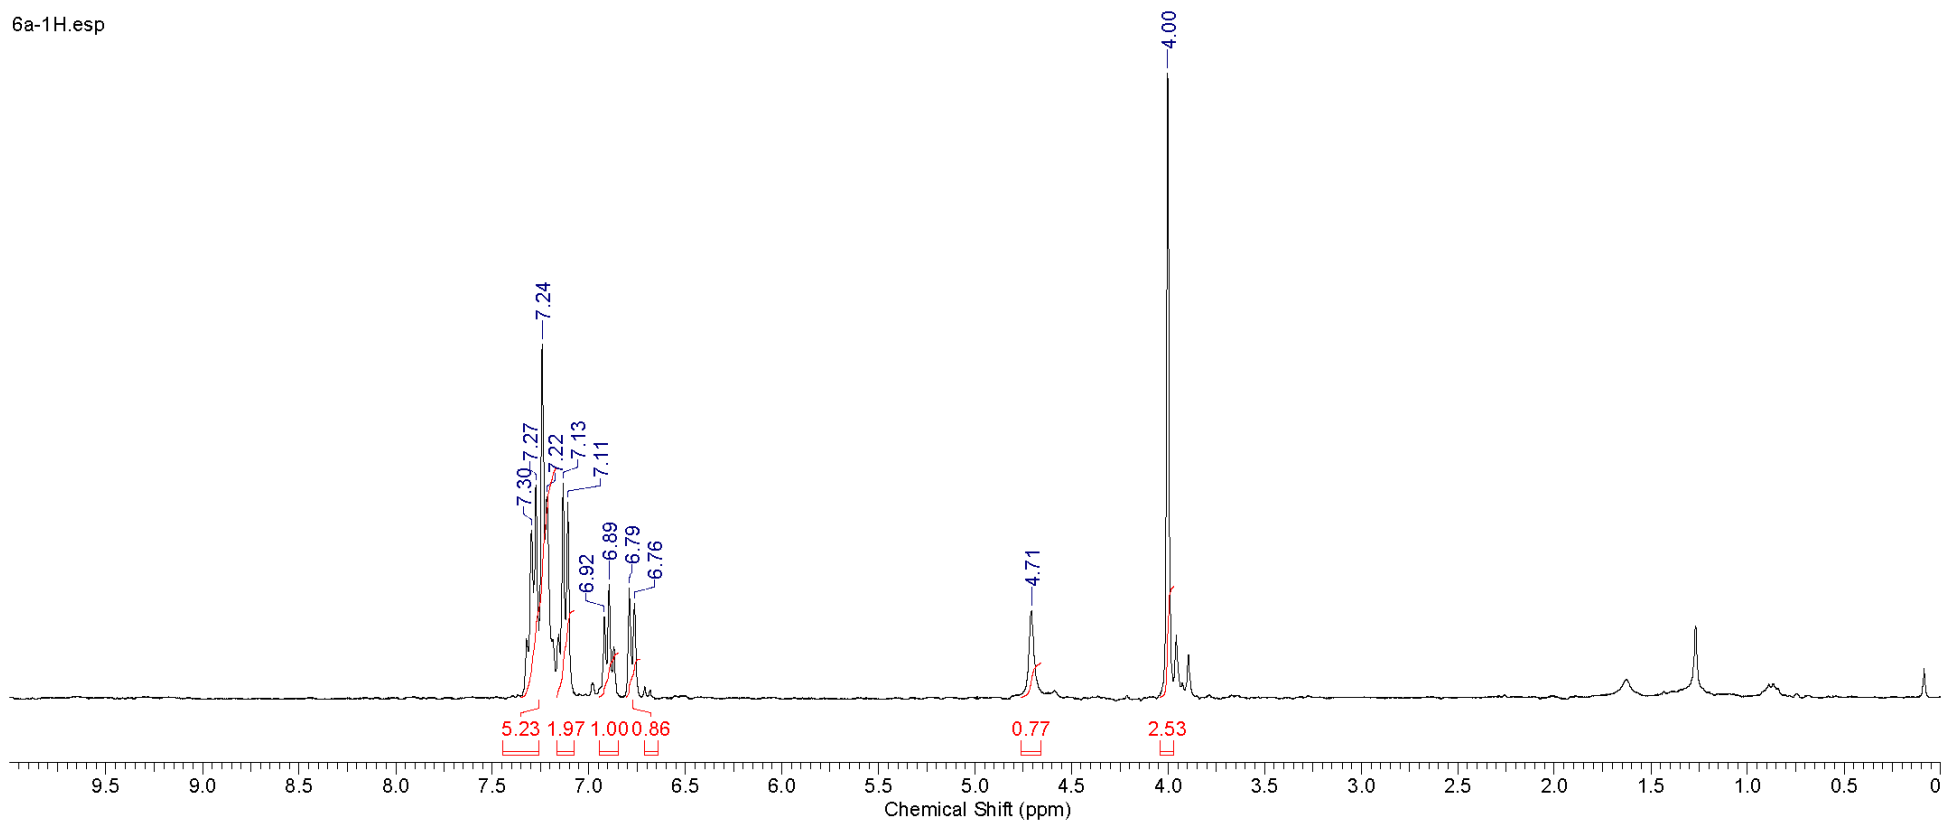

Formula C<sub>18</sub>H<sub>12</sub>O FW 184.2338

|                        |                                                      |              |           |                      |            |               |            |                      |          |
|------------------------|------------------------------------------------------|--------------|-----------|----------------------|------------|---------------|------------|----------------------|----------|
| Acquisition Time (sec) | 1.8150                                               | Comment      | CC152-13C | Date                 | Oct 1 2011 | Date Stamp    | Oct 1 2011 |                      |          |
| File Name              | C:\Users\User\Desktop\adam\CCclean\CC152-13C.fid\fid |              |           | Frequency (MHz)      | 75.46      | Nucleus       | 13C        | Number of Transients | 5564     |
| Original Points Count  | 34053                                                | Points Count | 65536     | Pulse Sequence       | s2pul      | Receiver Gain | 30.00      |                      |          |
| Solvent                | CHLOROFORM-d                                         |              |           | Spectrum Offset (Hz) | 7542.5186  | Spectrum Type | STANDARD   | Sweep Width (Hz)     | 18761.73 |
| Temperature (degree C) | AMBIENT TEMPERATURE                                  |              |           |                      |            |               |            |                      |          |

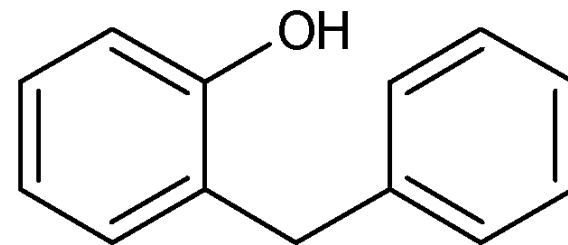

6a-13C.esp

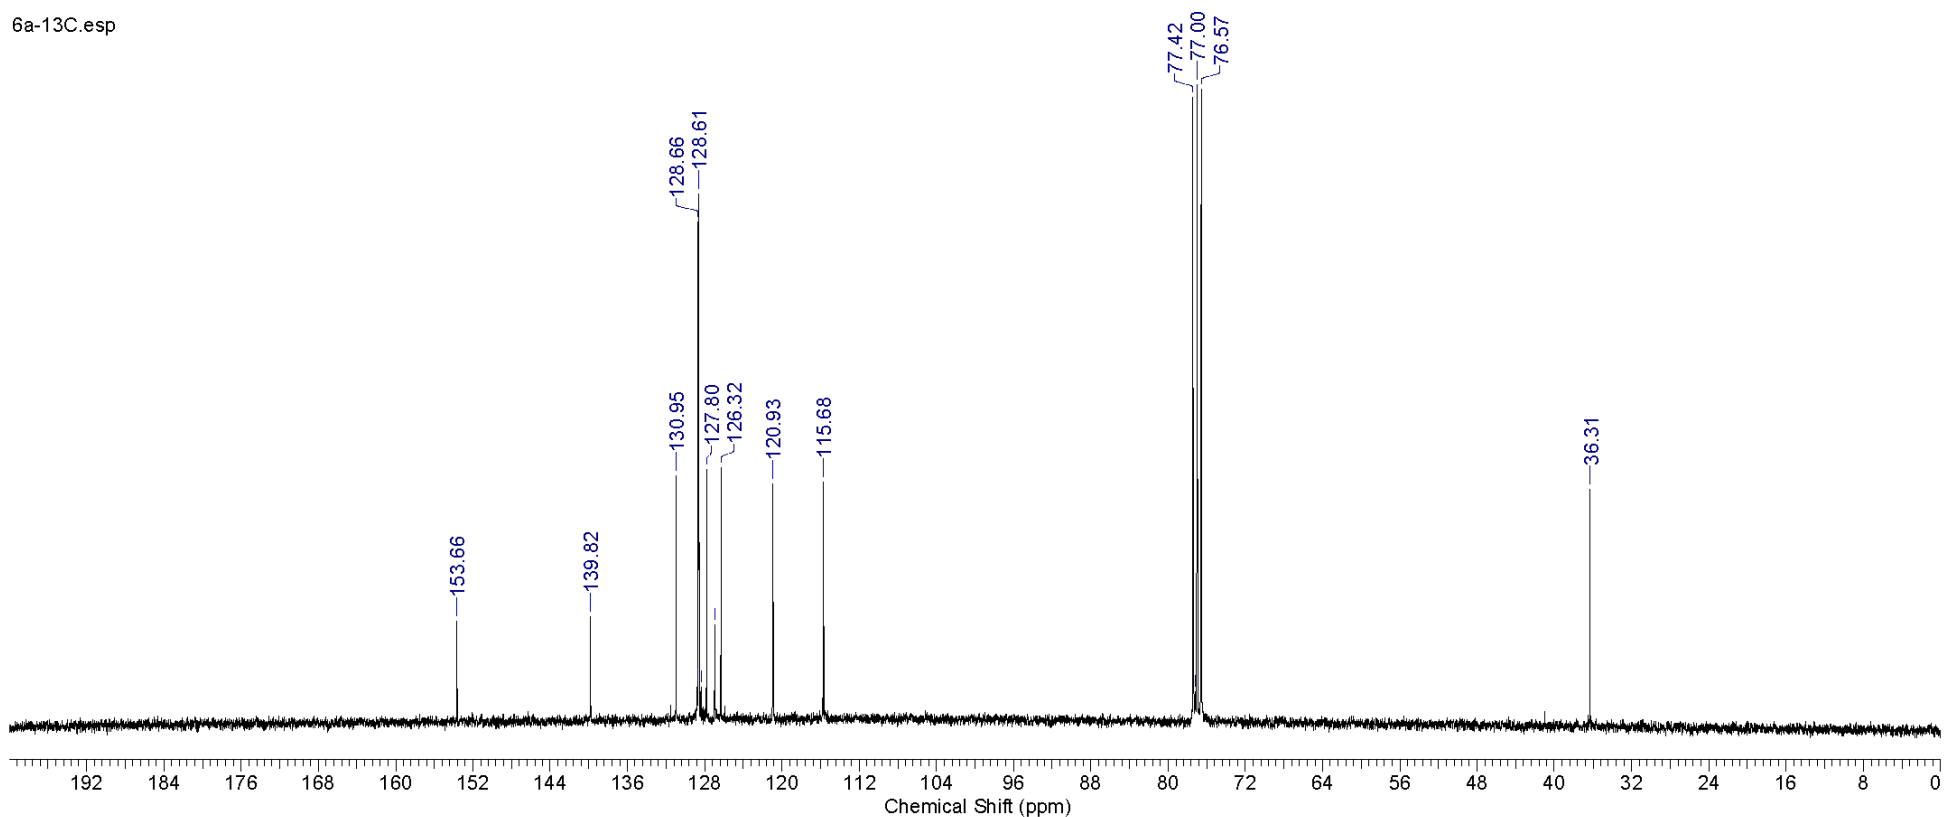

Formula C<sub>14</sub>H<sub>14</sub>O FW 198.2604

|                        |                                                     |               |          |                  |             |                        |                     |                      |              |
|------------------------|-----------------------------------------------------|---------------|----------|------------------|-------------|------------------------|---------------------|----------------------|--------------|
| Acquisition Time (sec) | 2.0000                                              | Comment       | CC174-1H | Date             | Sep 28 2011 | Date Stamp             | Sep 28 2011         |                      |              |
| File Name              | C:\Users\User\Desktop\adam\CCclean\CC174-1H.fid\fid |               |          | Frequency (MHz)  | 300.08      | Nucleus                | 1H                  | Number of Transients | 4            |
| Original Points Count  | 9600                                                | Points Count  | 16384    | Pulse Sequence   | s2pul       | Receiver Gain          | 2.00                | Solvent              | CHLOROFORM-d |
| Spectrum Offset (Hz)   | 1491.2437                                           | Spectrum Type | STANDARD | Sweep Width (Hz) | 4800.00     | Temperature (degree C) | AMBIENT TEMPERATURE |                      |              |

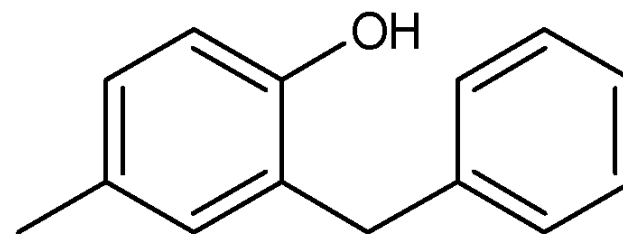

6b-1H.esp

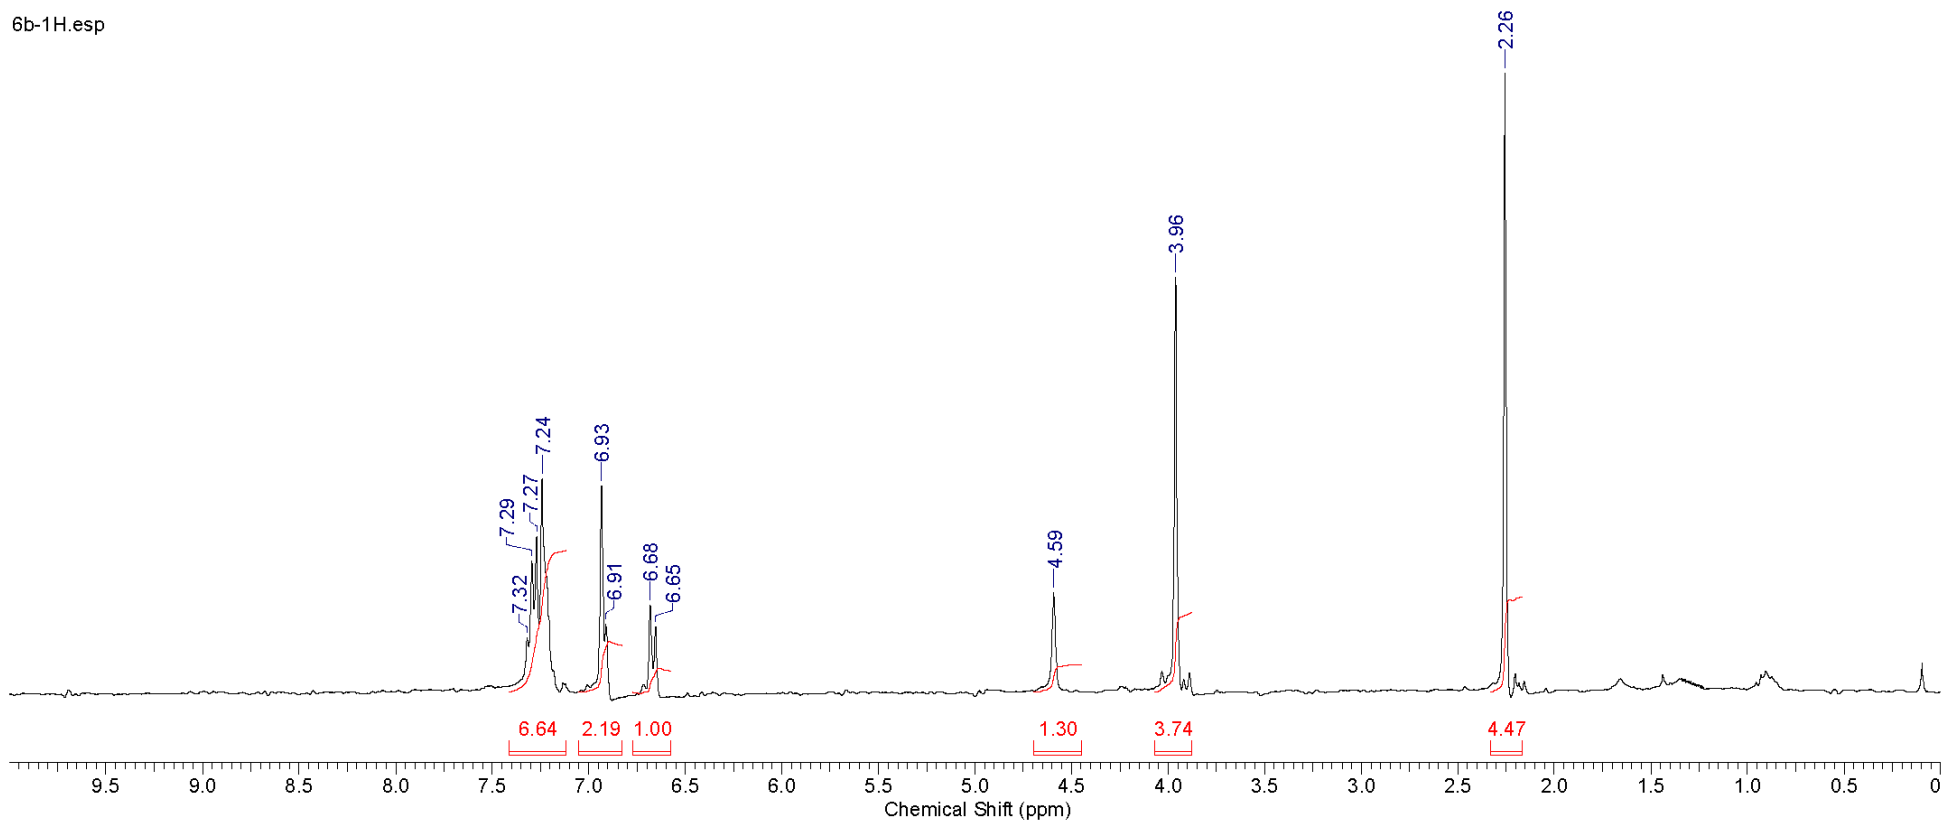

Formula C<sub>14</sub>H<sub>14</sub>O FW 198.2604

|                        |                                                      |              |           |                      |            |               |            |                      |          |
|------------------------|------------------------------------------------------|--------------|-----------|----------------------|------------|---------------|------------|----------------------|----------|
| Acquisition Time (sec) | 1.8150                                               | Comment      | CC174-13C | Date                 | Oct 2 2011 | Date Stamp    | Oct 2 2011 |                      |          |
| File Name              | C:\Users\User\Desktop\adam\CCclean\CC174-13C.fid\fid |              |           | Frequency (MHz)      | 75.46      | Nucleus       | 13C        | Number of Transients | 9148     |
| Original Points Count  | 34053                                                | Points Count | 65536     | Pulse Sequence       | s2pul      | Receiver Gain | 30.00      |                      |          |
| Solvent                | CHLOROFORM-d                                         |              |           | Spectrum Offset (Hz) | 7540.2358  | Spectrum Type | STANDARD   | Sweep Width (Hz)     | 18761.73 |
| Temperature (degree C) | AMBIENT TEMPERATURE                                  |              |           |                      |            |               |            |                      |          |

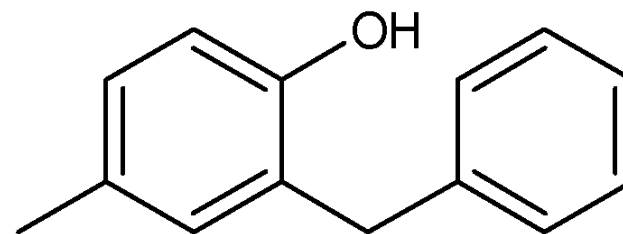

6b-13C.esp

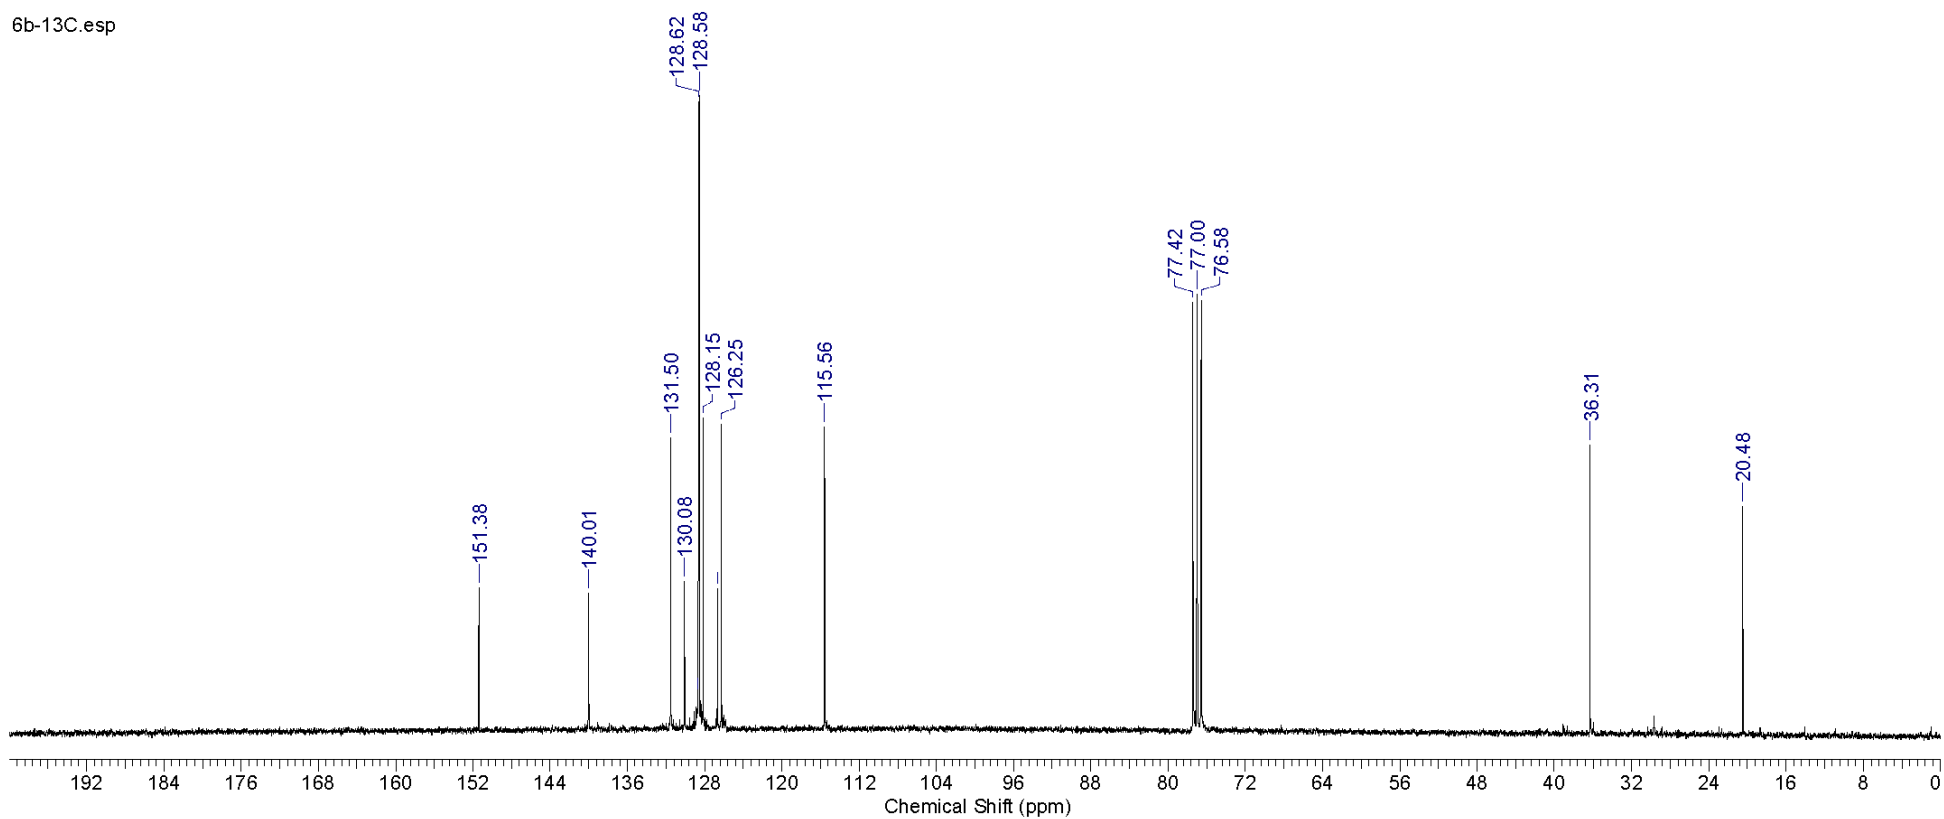

Formula  $C_{17}H_{16}O$  FW 238.3242

|                        |                                                    |                 |          |                  |             |                        |                     |
|------------------------|----------------------------------------------------|-----------------|----------|------------------|-------------|------------------------|---------------------|
| Acquisition Time (sec) | 2.0000                                             | Comment         | CC81-1H  | Date             | Feb 23 2011 | Date Stamp             | Feb 23 2011         |
| File Name              | C:\Users\User\Desktop\adam\CCclean\CC81-1H.fid\fid | Frequency (MHz) | 300.08   | Nucleus          | 1H          | Number of Transients   | 4                   |
| Original Points Count  | 9600                                               | Points Count    | 16384    | Pulse Sequence   | s2pul       | Receiver Gain          | 2.00                |
| Spectrum Offset (Hz)   | 1493.0132                                          | Spectrum Type   | STANDARD | Sweep Width (Hz) | 4800.00     | Temperature (degree C) | AMBIENT TEMPERATURE |

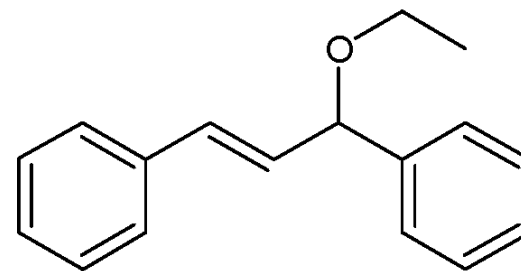

8a-1H.esp

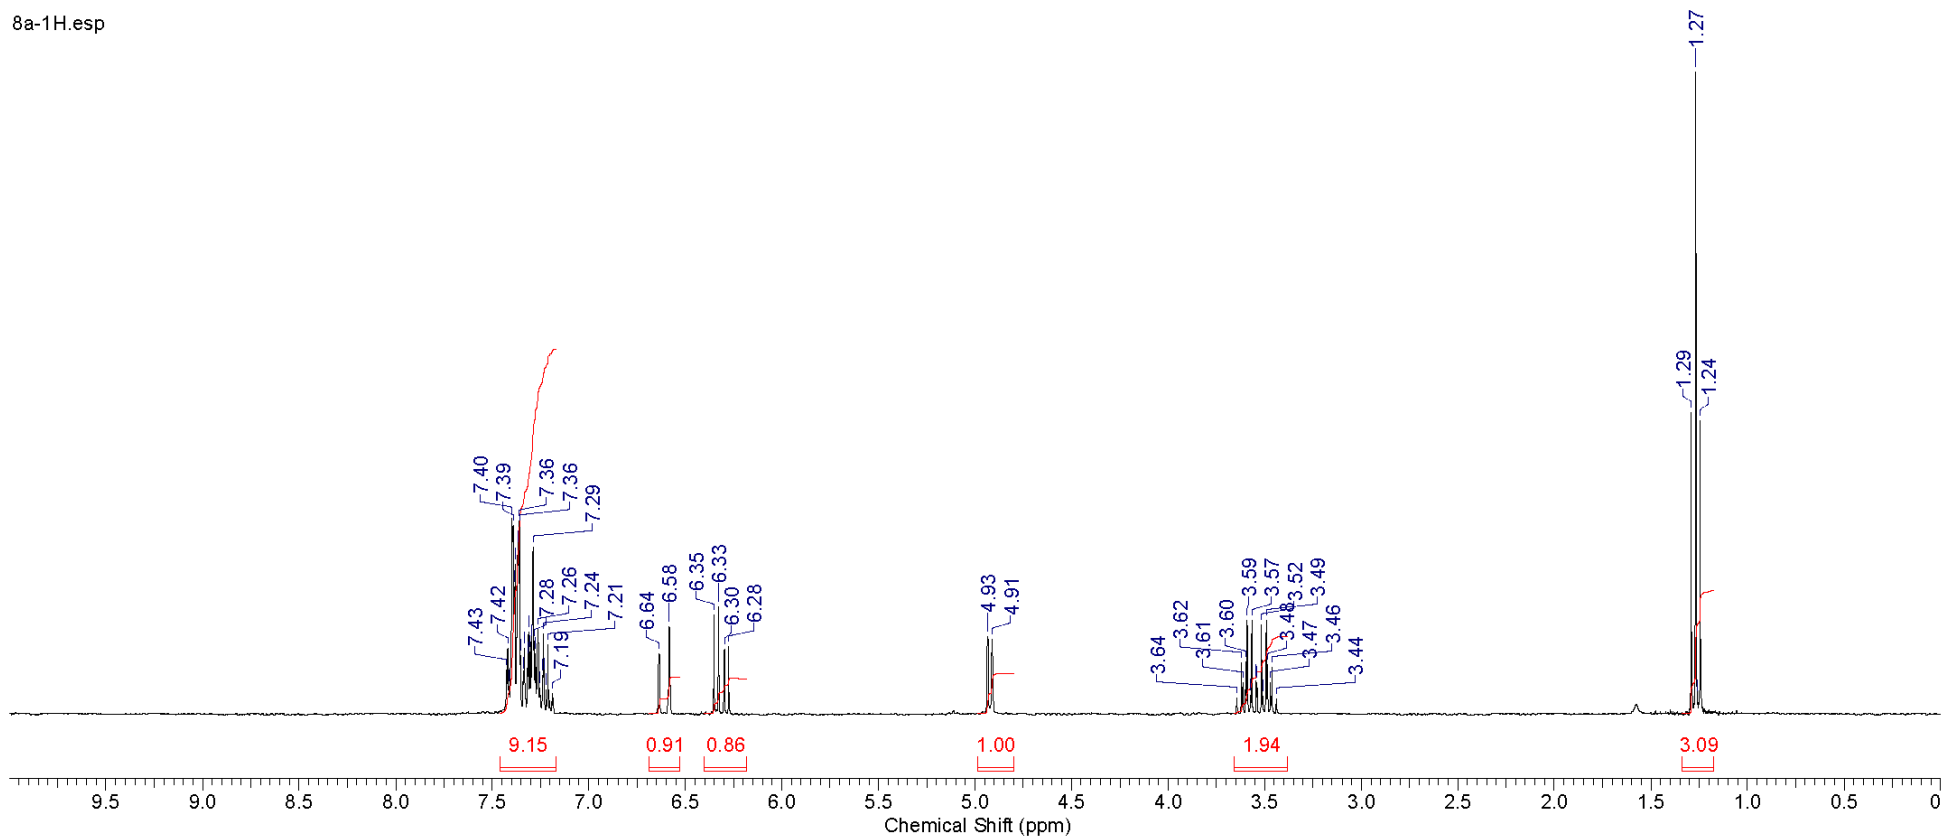

Formula C<sub>17</sub>H<sub>16</sub>O FW 238.3242

|                        |                                                     |              |          |                      |             |               |             |                      |          |
|------------------------|-----------------------------------------------------|--------------|----------|----------------------|-------------|---------------|-------------|----------------------|----------|
| Acquisition Time (sec) | 1.8150                                              | Comment      | CC81-13C | Date                 | Feb 23 2011 | Date Stamp    | Feb 23 2011 |                      |          |
| File Name              | C:\Users\User\Desktop\adam\CCclean\CC81-13C.fid\fid |              |          | Frequency (MHz)      | 75.46       | Nucleus       | 13C         | Number of Transients | 152      |
| Original Points Count  | 34053                                               | Points Count | 65536    | Pulse Sequence       | s2pul       | Receiver Gain | 33.00       |                      |          |
| Solvent                | CHLOROFORM-d                                        |              |          | Spectrum Offset (Hz) | 7541.6680   | Spectrum Type | STANDARD    | Sweep Width (Hz)     | 18761.73 |
| Temperature (degree C) | AMBIENT TEMPERATURE                                 |              |          |                      |             |               |             |                      |          |

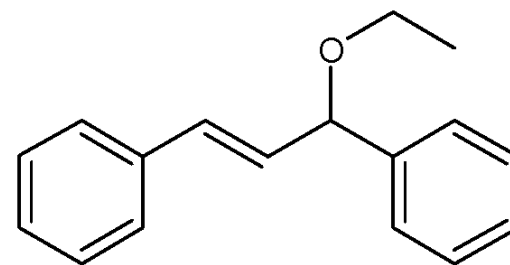

8a-13C.esp

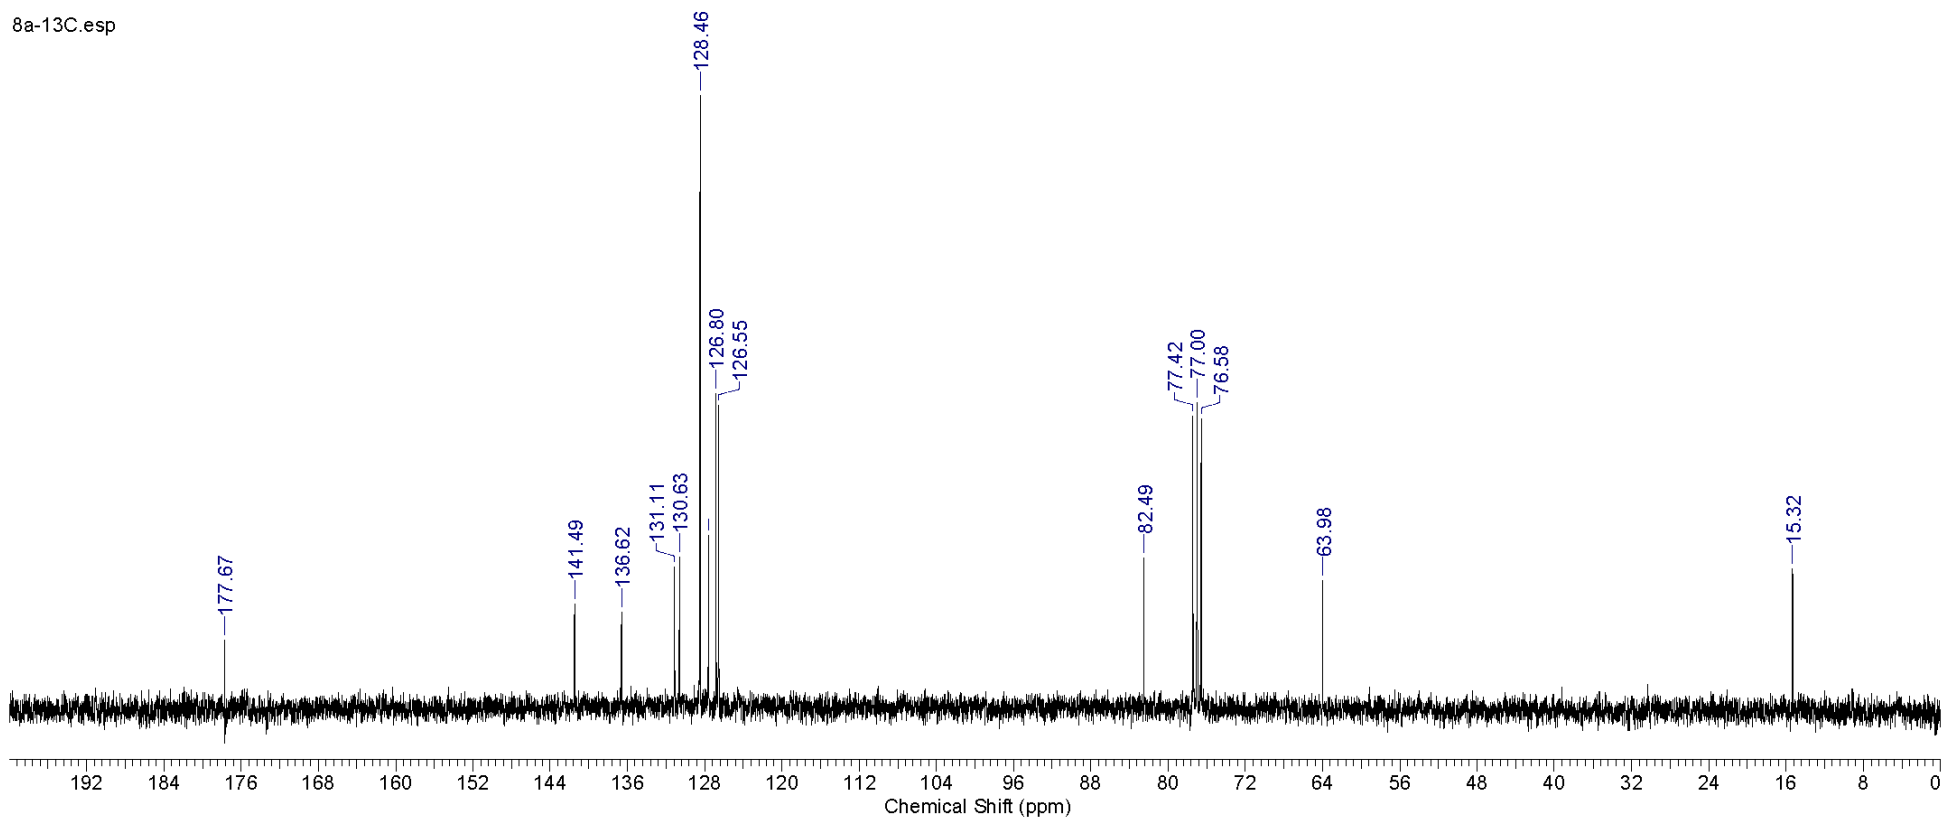

Formula C<sub>18</sub>H<sub>16</sub>O FW 250.3349

|                        |                                                    |                 |          |                  |             |                        |                     |
|------------------------|----------------------------------------------------|-----------------|----------|------------------|-------------|------------------------|---------------------|
| Acquisition Time (sec) | 2.0000                                             | Comment         | CC79-1H  | Date             | Feb 14 2011 | Date Stamp             | Feb 14 2011         |
| File Name              | C:\Users\User\Desktop\adam\CCclean\CC79-1H.fid\fid | Frequency (MHz) | 300.08   | Nucleus          | 1H          | Number of Transients   | 8                   |
| Original Points Count  | 9600                                               | Points Count    | 16384    | Pulse Sequence   | s2pul       | Receiver Gain          | 10.00               |
| Spectrum Offset (Hz)   | 1493.4601                                          | Spectrum Type   | STANDARD | Sweep Width (Hz) | 4800.00     | Temperature (degree C) | AMBIENT TEMPERATURE |

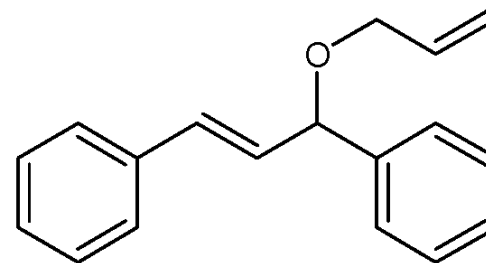

8b-1H.esp

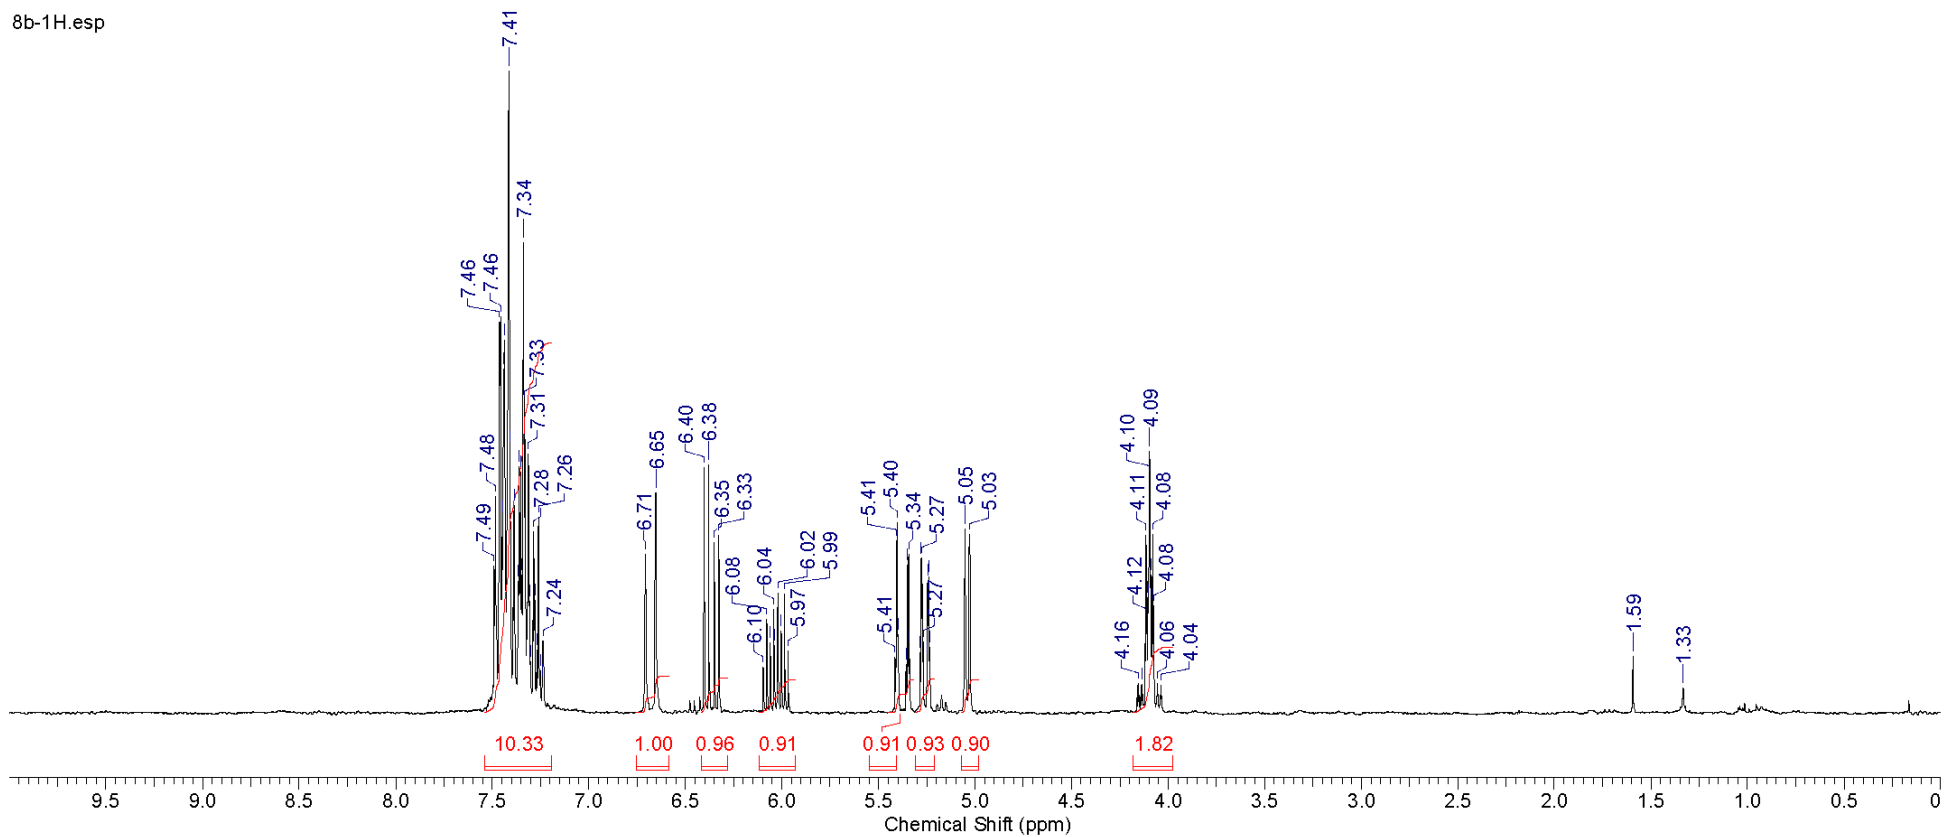



Formula C<sub>18</sub>H<sub>16</sub>O FW 250.3349

|                        |                                                     |              |          |                      |             |               |             |                      |          |
|------------------------|-----------------------------------------------------|--------------|----------|----------------------|-------------|---------------|-------------|----------------------|----------|
| Acquisition Time (sec) | 1.8150                                              | Comment      | CC79-13C | Date                 | Feb 14 2011 | Date Stamp    | Feb 14 2011 |                      |          |
| File Name              | C:\Users\User\Desktop\adam\CCclean\Cc79-13C.fid\fid |              |          | Frequency (MHz)      | 75.46       | Nucleus       | 13C         | Number of Transients | 2316     |
| Original Points Count  | 34053                                               | Points Count | 65536    | Pulse Sequence       | s2pul       | Receiver Gain | 33.00       |                      |          |
| Solvent                | CHLOROFORM-d                                        |              |          | Spectrum Offset (Hz) | 7533.9307   | Spectrum Type | STANDARD    | Sweep Width (Hz)     | 18761.73 |
| Temperature (degree C) | AMBIENT TEMPERATURE                                 |              |          |                      |             |               |             |                      |          |

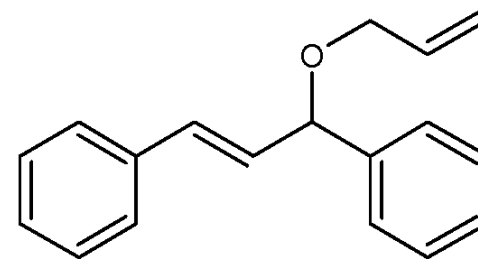

8b-13C.esp

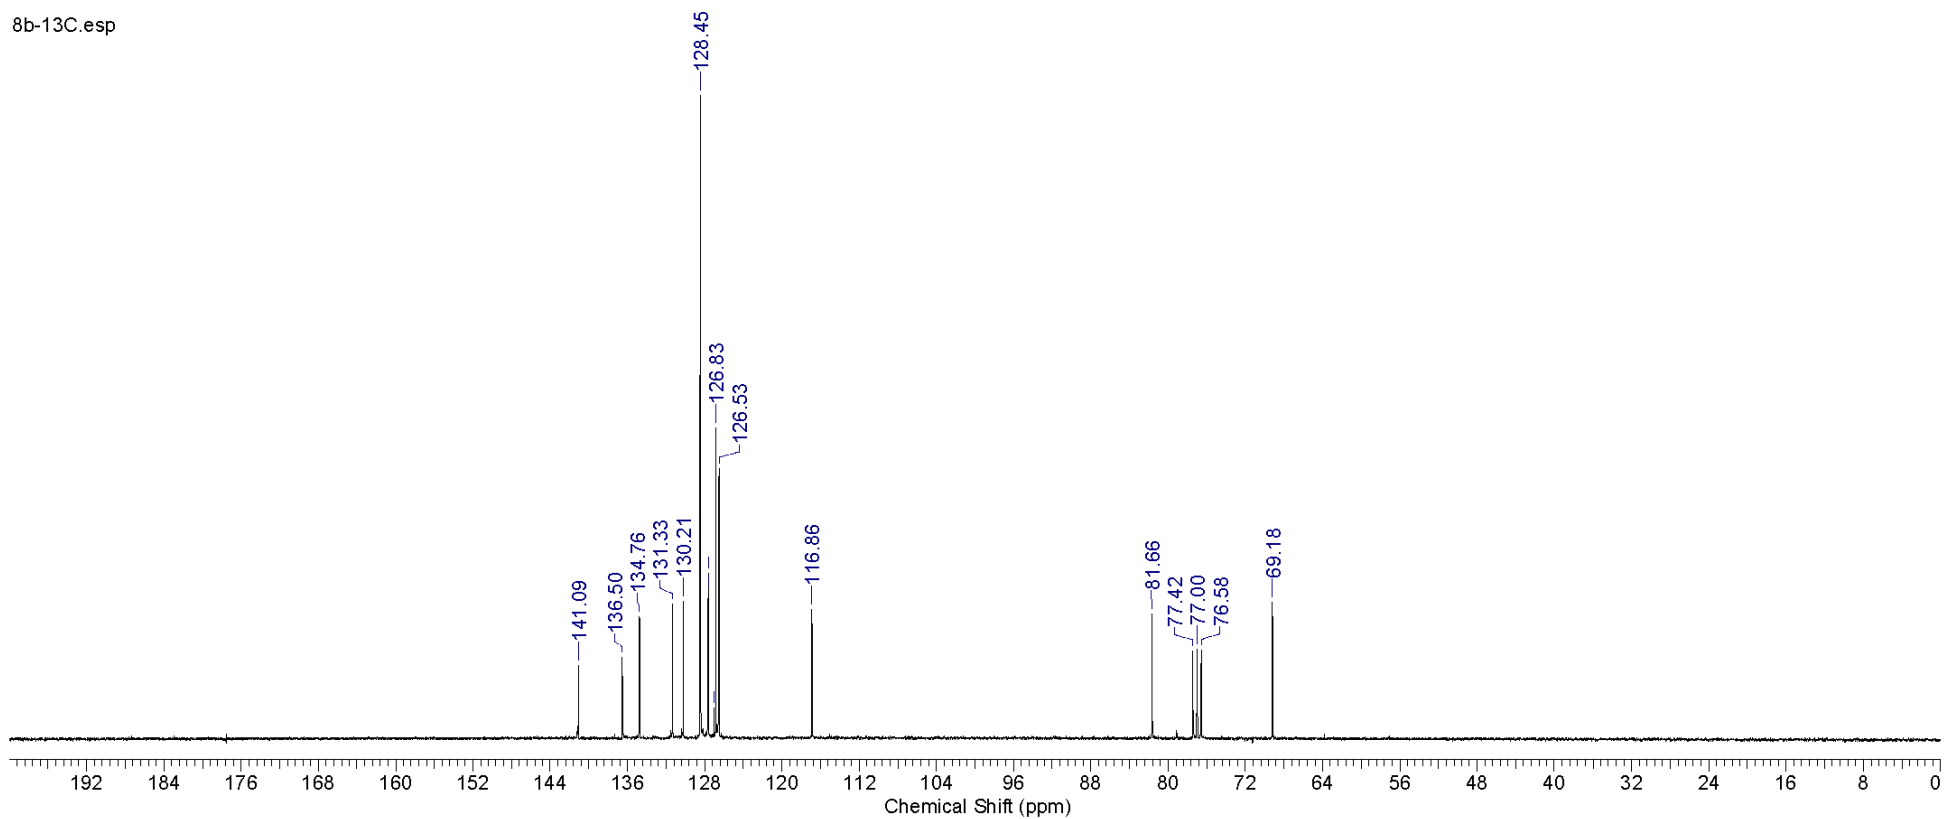

Formula C<sub>18</sub>H<sub>16</sub>O FW 248.3190

|                        |                                                     |               |          |                  |             |                        |                     |
|------------------------|-----------------------------------------------------|---------------|----------|------------------|-------------|------------------------|---------------------|
| Acquisition Time (sec) | 2.0000                                              | Comment       | CC118-1H | Date             | Feb 15 2011 | Date Stamp             | Feb 15 2011         |
| File Name              | C:\Users\User\Desktop\adam\CCclean\CC118-1H.fid\fid |               |          | Frequency (MHz)  | 300.08      | Nucleus                | 1H                  |
| Original Points Count  | 9600                                                | Points Count  | 16384    | Pulse Sequence   | s2pul       | Receiver Gain          | 8.00                |
| Spectrum Offset (Hz)   | 1495.0859                                           | Spectrum Type | STANDARD | Sweep Width (Hz) | 4800.00     | Temperature (degree C) | AMBIENT TEMPERATURE |
|                        |                                                     |               |          |                  |             | Number of Transients   | 8                   |
|                        |                                                     |               |          |                  |             | Solvent                | CHLOROFORM-d        |

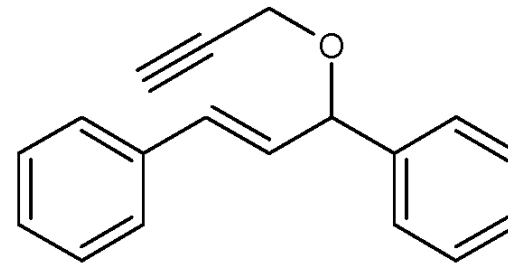

8c-1H.esp

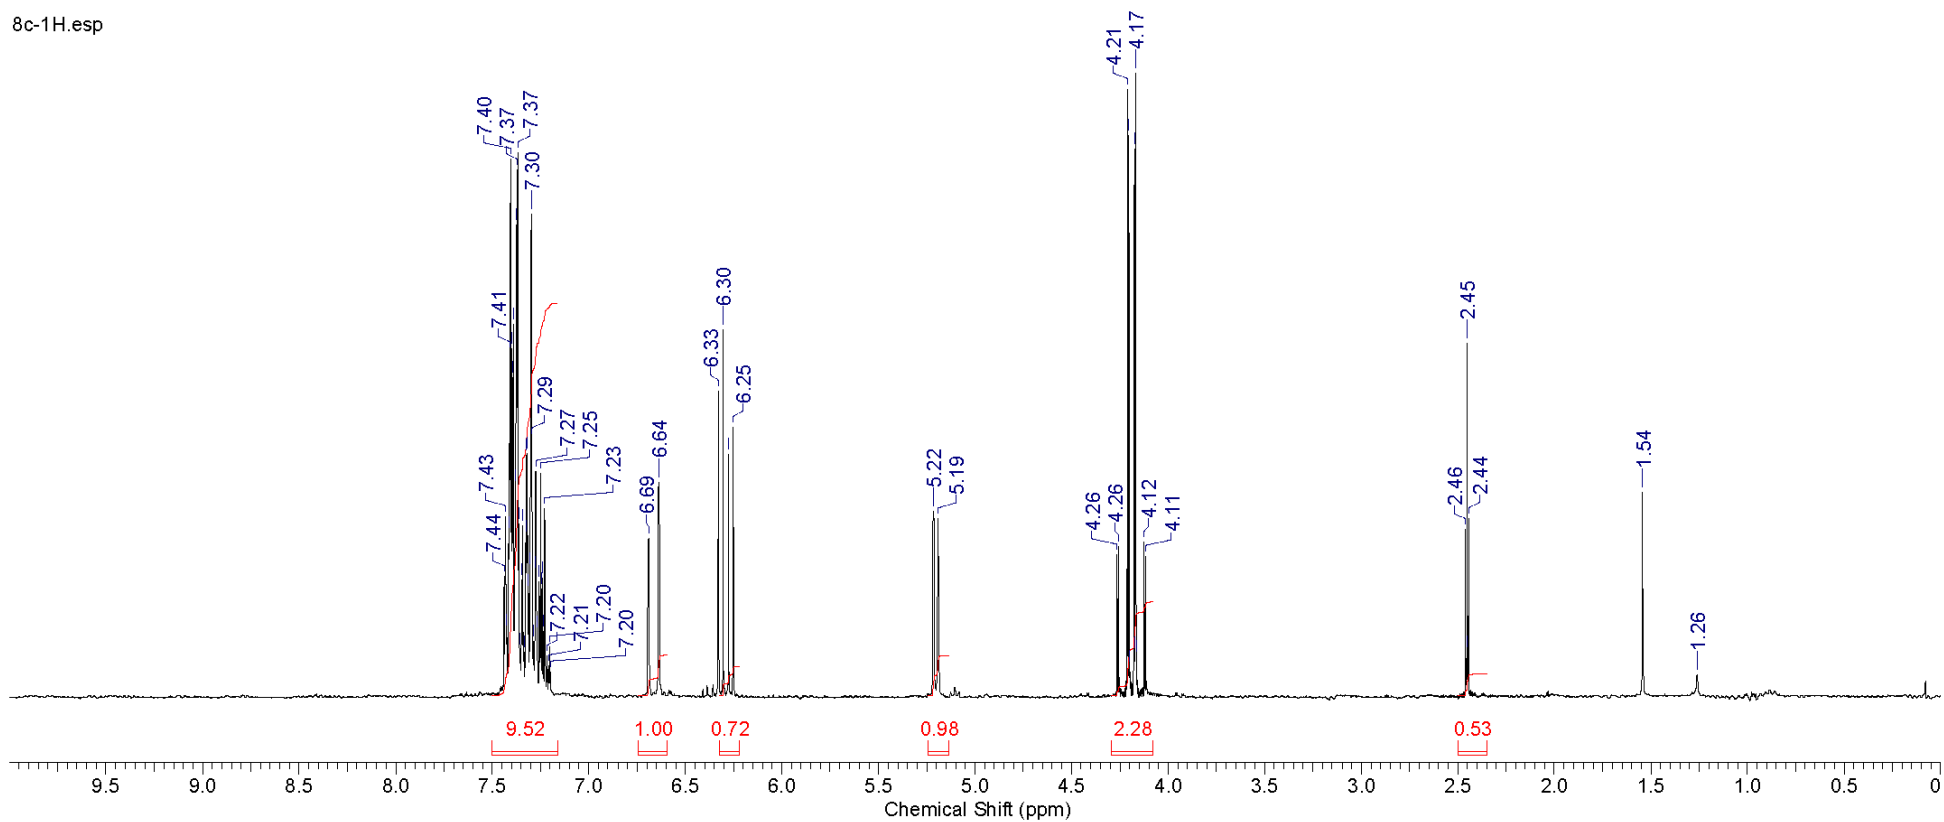

Formula C<sub>18</sub>H<sub>16</sub>O FW 248.3190

|                        |                                                      |                       |                 |                        |                     |                |             |
|------------------------|------------------------------------------------------|-----------------------|-----------------|------------------------|---------------------|----------------|-------------|
| Acquisition Time (sec) | 1.8150                                               | Comment               | CC118-13C       | Date                   | Feb 15 2011         | Date Stamp     | Feb 15 2011 |
| File Name              | C:\Users\User\Desktop\adam\CCclean\CC118-13C.fid\fid |                       | Frequency (MHz) | 75.46                  | Nucleus             | 13C            |             |
| Number of Transients   | 3172                                                 | Original Points Count | 34053           | Points Count           | 65536               | Pulse Sequence | s2pul       |
| Receiver Gain          | 33.00                                                | Solvent               | CHLOROFORM-d    | Spectrum Offset (Hz)   | 7542.2329           |                |             |
| Spectrum Type          | STANDARD                                             | Sweep Width (Hz)      | 18761.73        | Temperature (degree C) | AMBIENT TEMPERATURE |                |             |

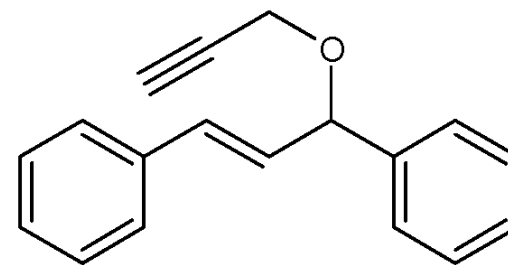

8c-13C.esp

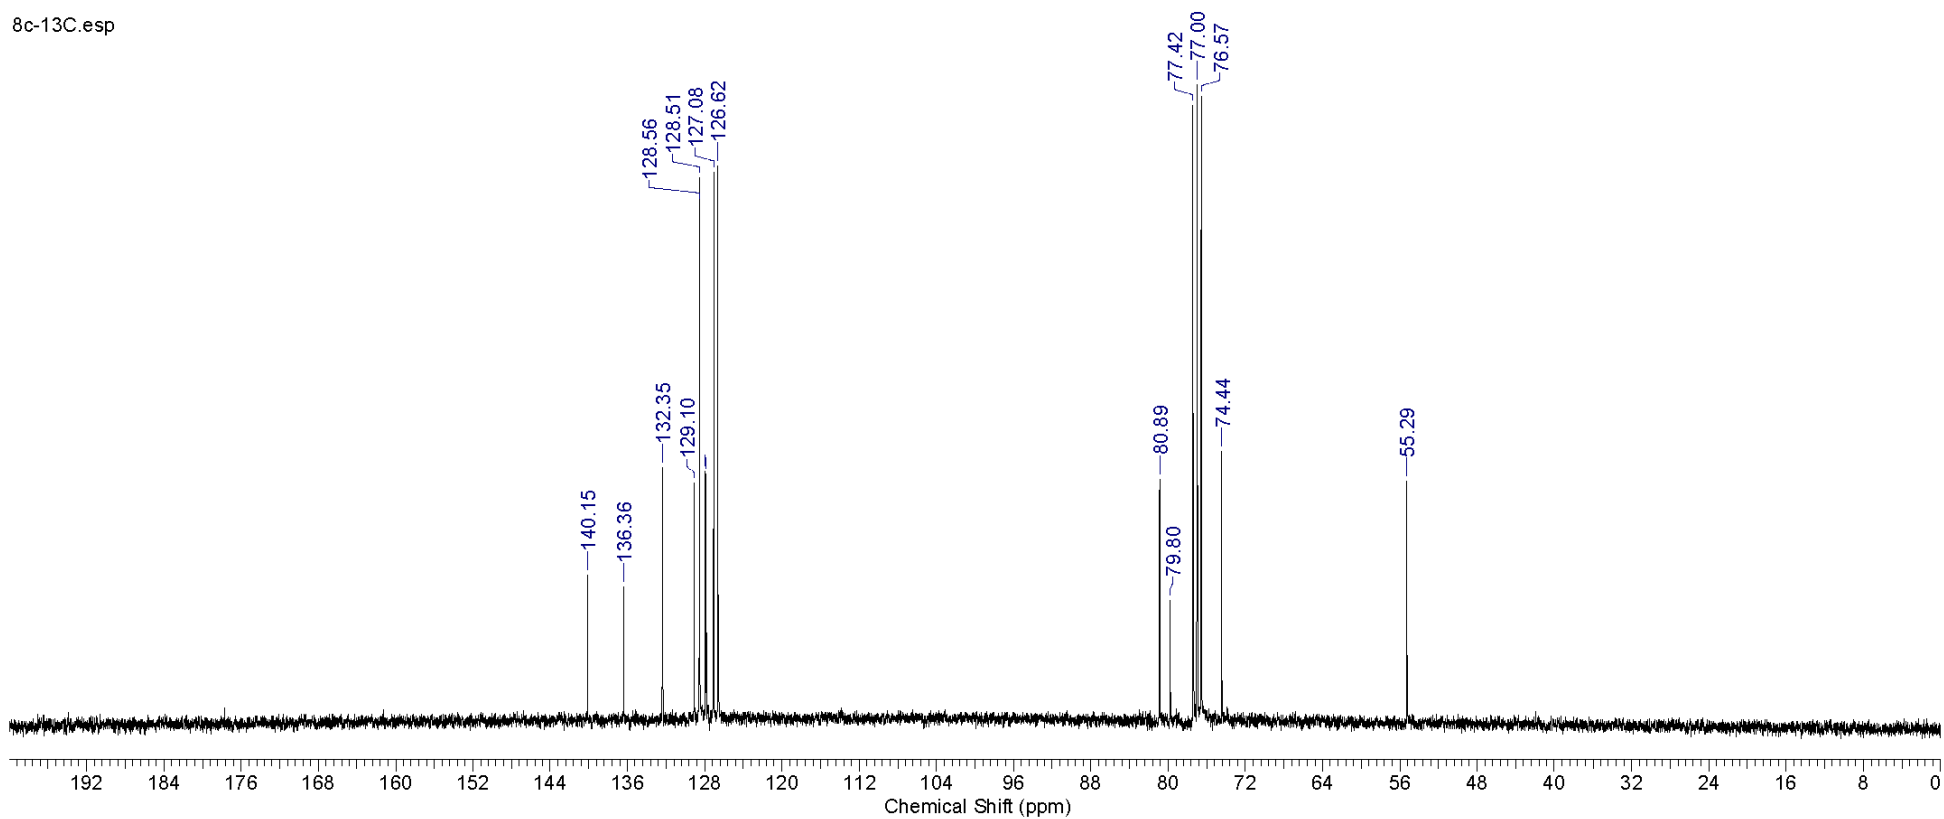

Formula  $C_{20}H_{20}O_2$  FW 292.3716

|                        |                                                    |                 |          |                  |            |                        |                     |              |
|------------------------|----------------------------------------------------|-----------------|----------|------------------|------------|------------------------|---------------------|--------------|
| Acquisition Time (sec) | 2.0000                                             | Comment         | CC61-1H  | Date             | Feb 1 2011 | Date Stamp             | Feb 1 2011          |              |
| File Name              | C:\Users\User\Desktop\adam\CCclean\CC61-1H.fid\fid | Frequency (MHz) | 300.08   | Nucleus          | 1H         | Number of Transients   | 8                   |              |
| Original Points Count  | 9600                                               | Points Count    | 16384    | Pulse Sequence   | s2pul      | Receiver Gain          | 3.00                |              |
| Spectrum Offset (Hz)   | 1493.7749                                          | Spectrum Type   | STANDARD | Sweep Width (Hz) | 4800.00    | Temperature (degree C) | AMBIENT TEMPERATURE |              |
|                        |                                                    |                 |          |                  |            |                        | Solvent             | CHLOROFORM-d |

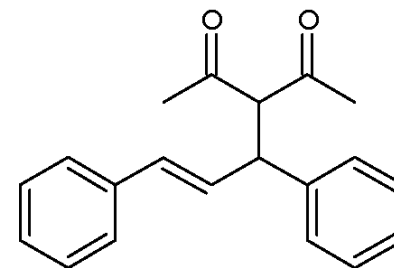

8d-1H.esp

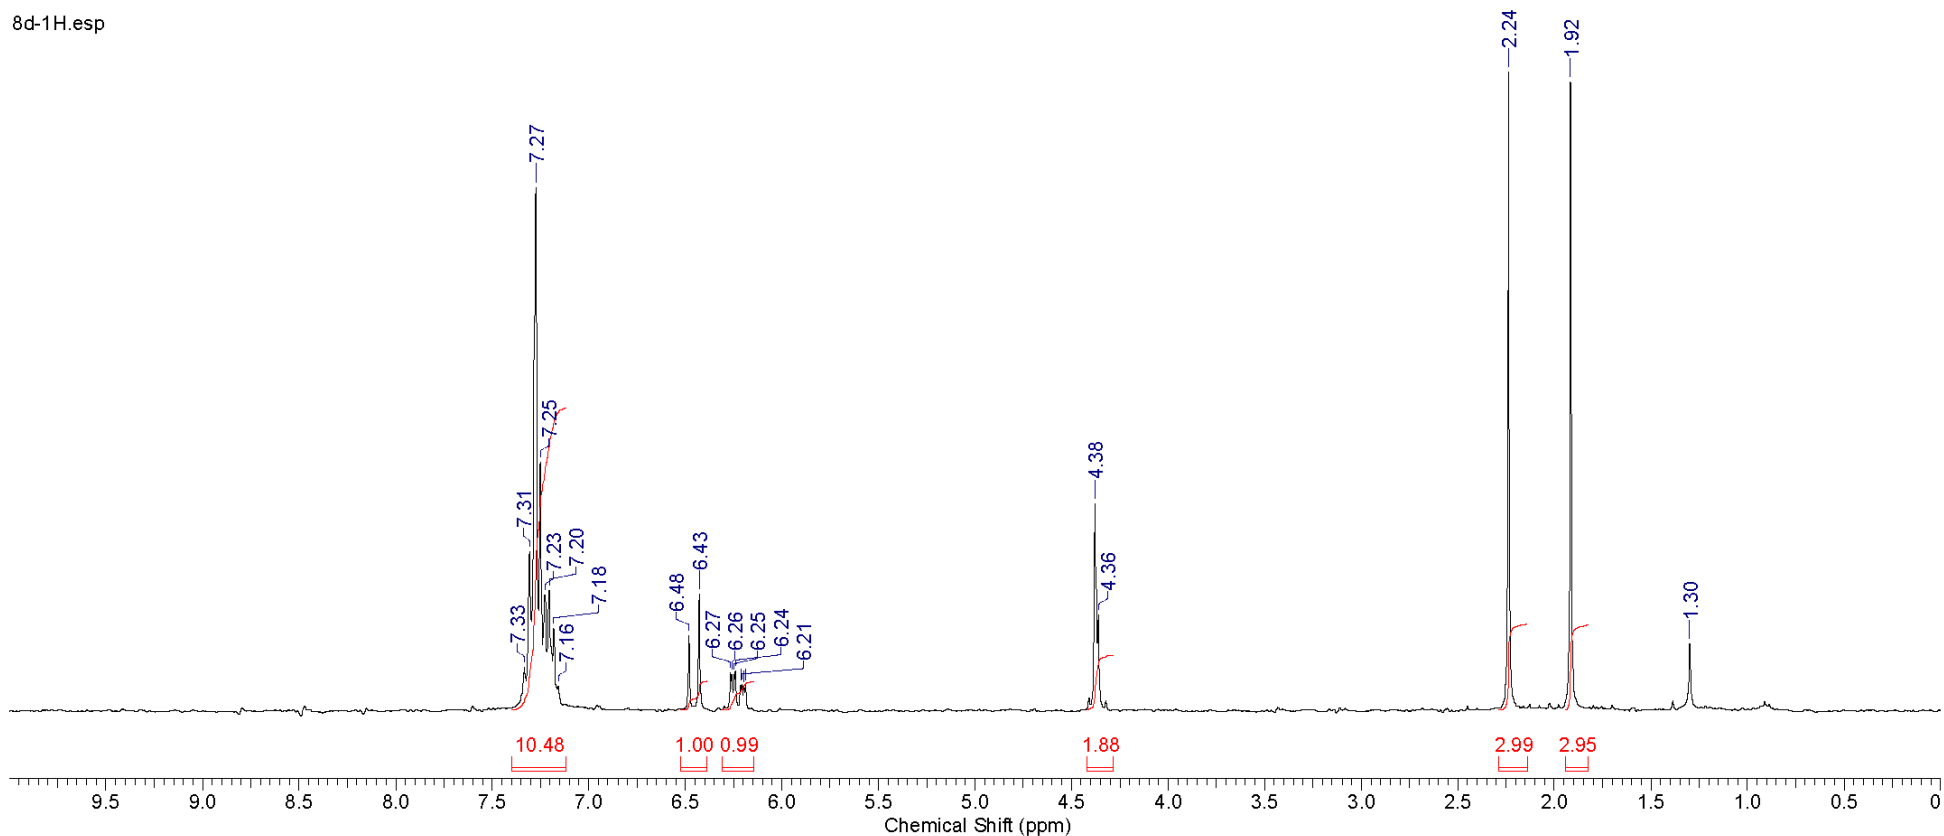

Formula C<sub>20</sub>H<sub>20</sub>O<sub>2</sub> FW 292.3716

|                        |                                                     |              |          |                      |            |               |            |                      |          |
|------------------------|-----------------------------------------------------|--------------|----------|----------------------|------------|---------------|------------|----------------------|----------|
| Acquisition Time (sec) | 1.8150                                              | Comment      | CC61-13C | Date                 | Feb 1 2011 | Date Stamp    | Feb 1 2011 |                      |          |
| File Name              | C:\Users\User\Desktop\adam\CCclean\CC61-13C.fid\fid |              |          | Frequency (MHz)      | 75.46      | Nucleus       | 13C        | Number of Transients | 100      |
| Original Points Count  | 34053                                               | Points Count | 65536    | Pulse Sequence       | s2pul      | Receiver Gain | 29.00      |                      |          |
| Solvent                | CHLOROFORM-d                                        |              |          | Spectrum Offset (Hz) | 7521.0488  | Spectrum Type | STANDARD   | Sweep Width (Hz)     | 18761.73 |
| Temperature (degree C) | AMBIENT TEMPERATURE                                 |              |          |                      |            |               |            |                      |          |

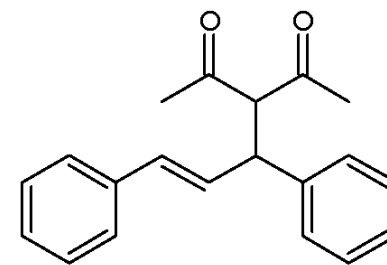

8d-13C.esp

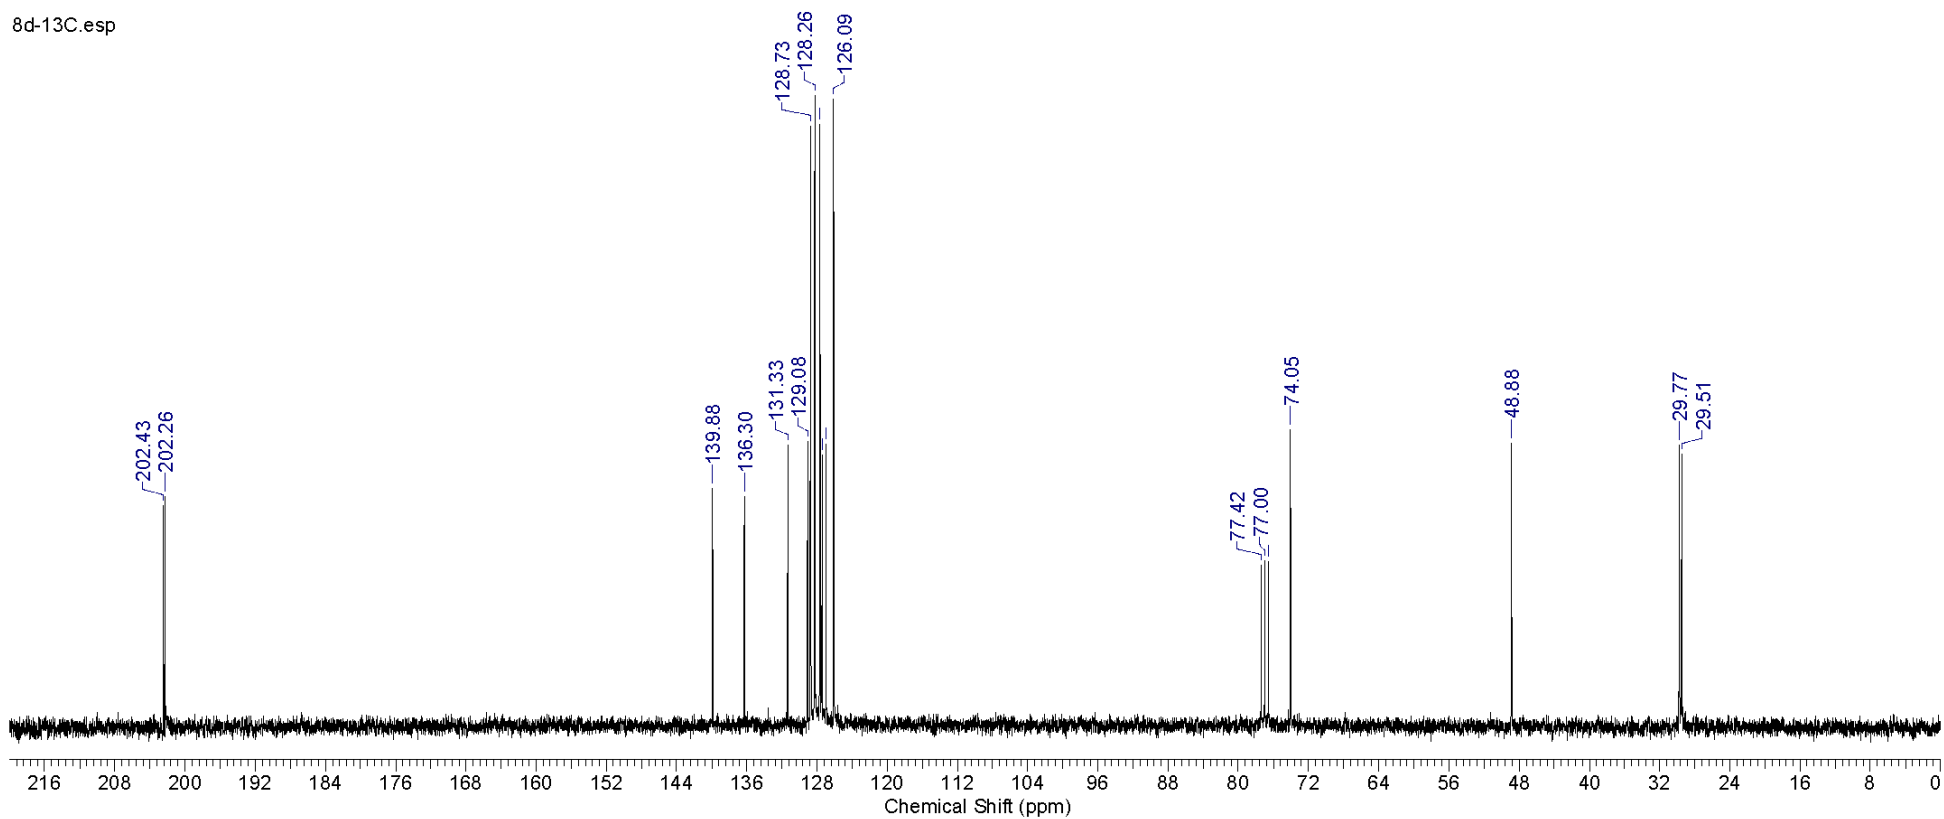

Formula  $C_{21}H_{22}O_3$  FW 322.3976

|                        |                                                    |                 |          |                  |            |                        |                     |
|------------------------|----------------------------------------------------|-----------------|----------|------------------|------------|------------------------|---------------------|
| Acquisition Time (sec) | 2.0000                                             | Comment         | CC63-1H  | Date             | Feb 4 2011 | Date Stamp             | Feb 4 2011          |
| File Name              | C:\Users\User\Desktop\adam\CCclean\CC63-1H.fid\fid | Frequency (MHz) | 300.08   | Nucleus          | 1H         | Number of Transients   | 1                   |
| Original Points Count  | 9600                                               | Points Count    | 16384    | Pulse Sequence   | s2pul      | Receiver Gain          | 4.00                |
| Spectrum Offset (Hz)   | 1541.7954                                          | Spectrum Type   | STANDARD | Sweep Width (Hz) | 4800.00    | Temperature (degree C) | AMBIENT TEMPERATURE |

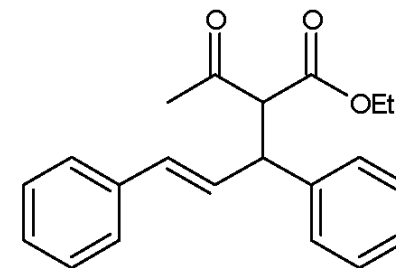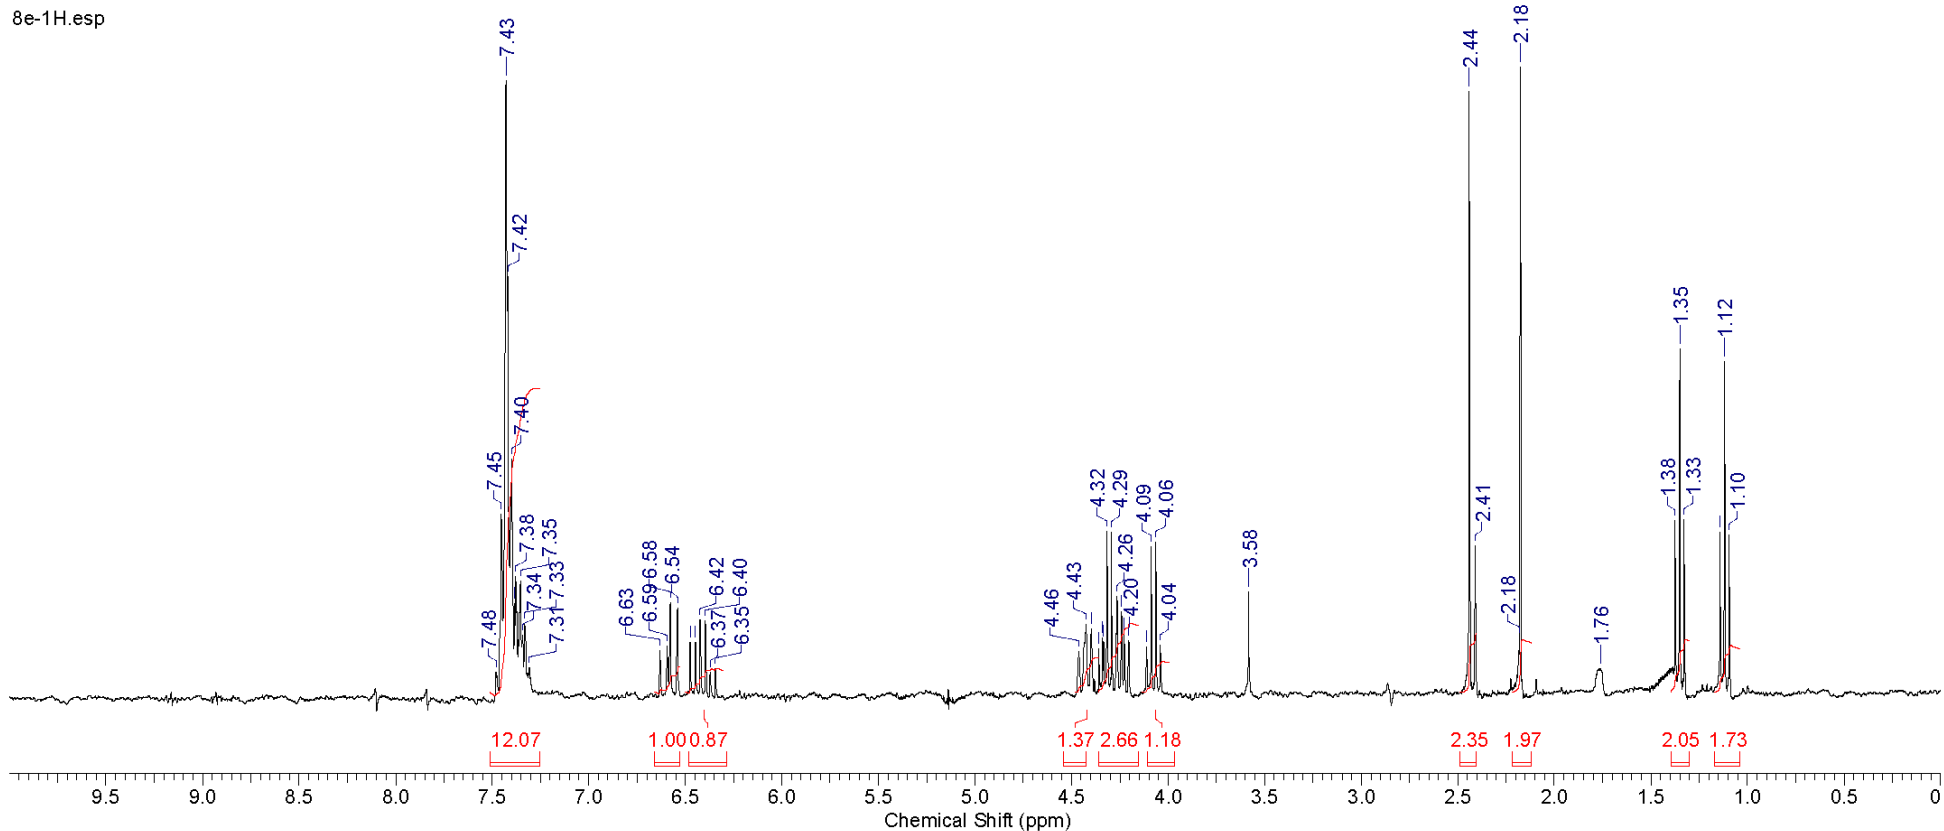

Formula C<sub>21</sub>H<sub>22</sub>O<sub>3</sub> FW 322.3976

|                        |                                                     |              |          |                      |             |               |             |                      |          |
|------------------------|-----------------------------------------------------|--------------|----------|----------------------|-------------|---------------|-------------|----------------------|----------|
| Acquisition Time (sec) | 1.8150                                              | Comment      | CC63-13C | Date                 | May 17 2010 | Date Stamp    | May 17 2010 |                      |          |
| File Name              | C:\Users\User\Desktop\adam\CCclean\CC63-13C.fid\fid |              |          | Frequency (MHz)      | 75.46       | Nucleus       | 13C         | Number of Transients | 156      |
| Original Points Count  | 34053                                               | Points Count | 65536    | Pulse Sequence       | s2pul       | Receiver Gain | 35.00       |                      |          |
| Solvent                | CHLOROFORM-d                                        |              |          | Spectrum Offset (Hz) | 7536.9263   | Spectrum Type | STANDARD    | Sweep Width (Hz)     | 18761.73 |
| Temperature (degree C) | AMBIENT TEMPERATURE                                 |              |          |                      |             |               |             |                      |          |

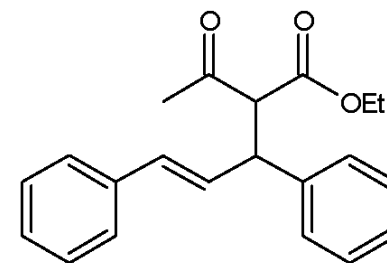

8e-13C.esp

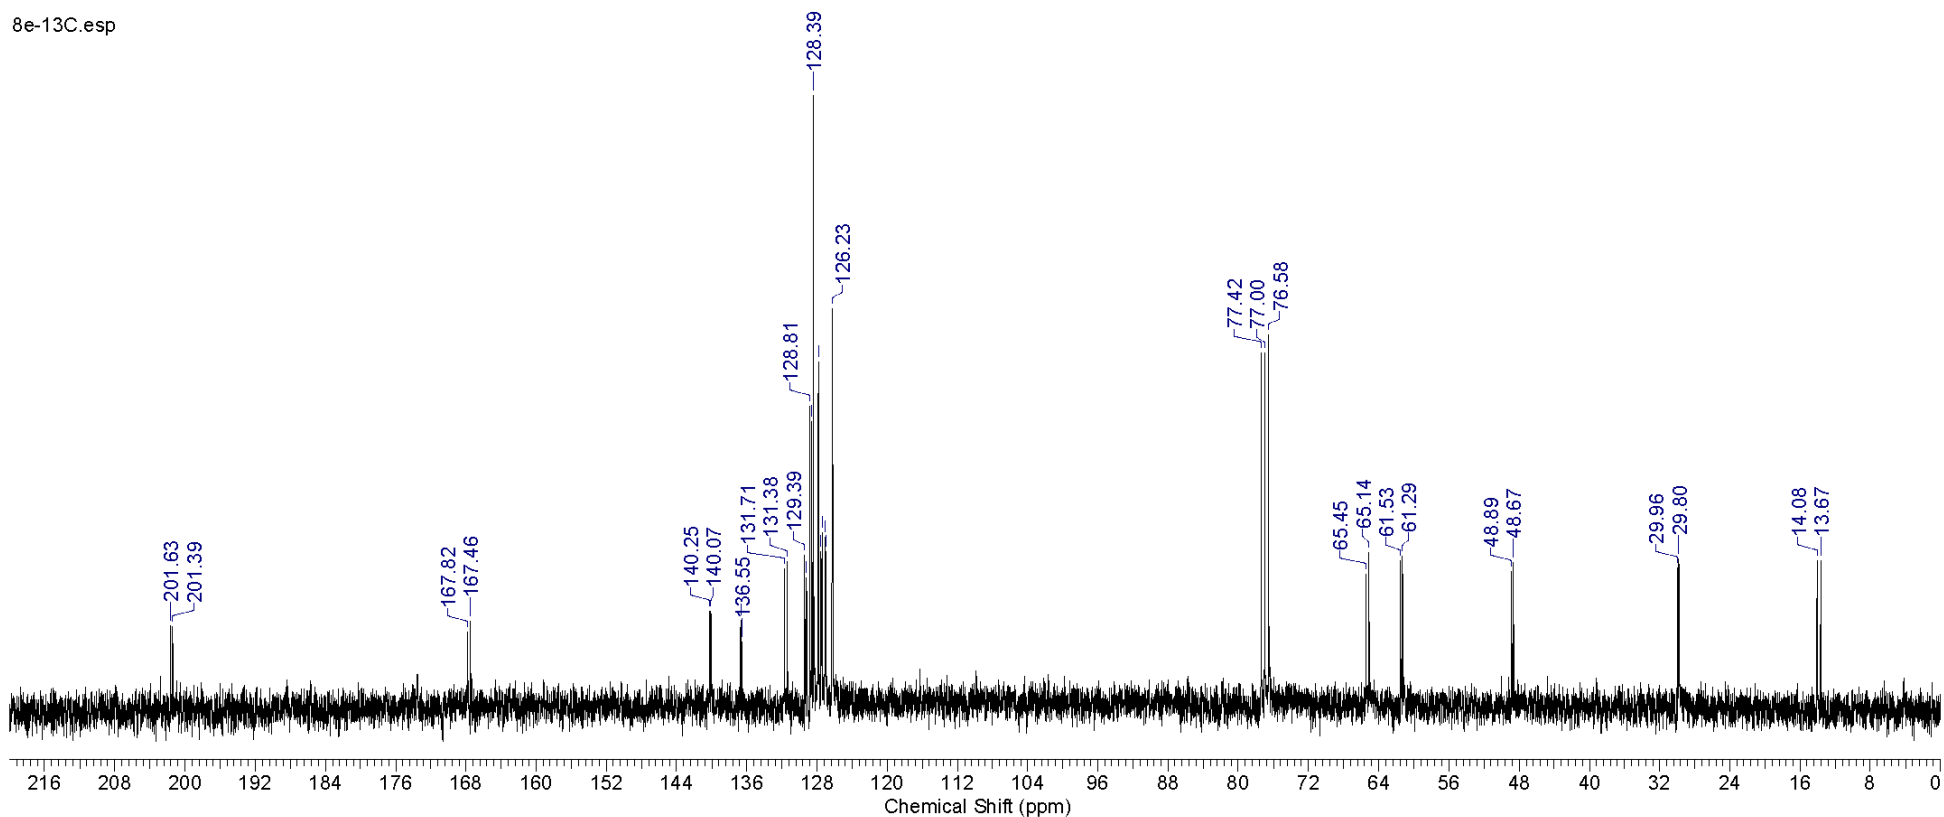

Formula C<sub>21</sub>H<sub>18</sub>S FW 302.4326

|                        |                                                     |               |          |                  |             |                        |                     |                      |              |
|------------------------|-----------------------------------------------------|---------------|----------|------------------|-------------|------------------------|---------------------|----------------------|--------------|
| Acquisition Time (sec) | 2.0000                                              | Comment       | CC120-1H | Date             | Feb 25 2011 | Date Stamp             | Feb 25 2011         |                      |              |
| File Name              | C:\Users\User\Desktop\adam\CCclean\CC120-1H.fid\fid |               |          | Frequency (MHz)  | 300.08      | Nucleus                | 1H                  | Number of Transients | 6            |
| Original Points Count  | 9600                                                | Points Count  | 16384    | Pulse Sequence   | s2pul       | Receiver Gain          | 8.00                | Solvent              | CHLOROFORM-d |
| Spectrum Offset (Hz)   | 1498.8611                                           | Spectrum Type | STANDARD | Sweep Width (Hz) | 4800.00     | Temperature (degree C) | AMBIENT TEMPERATURE |                      |              |

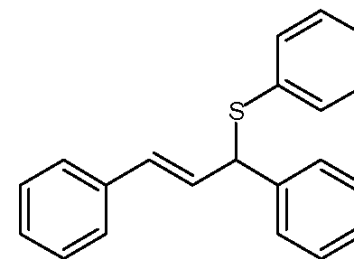

8f-1H.esp

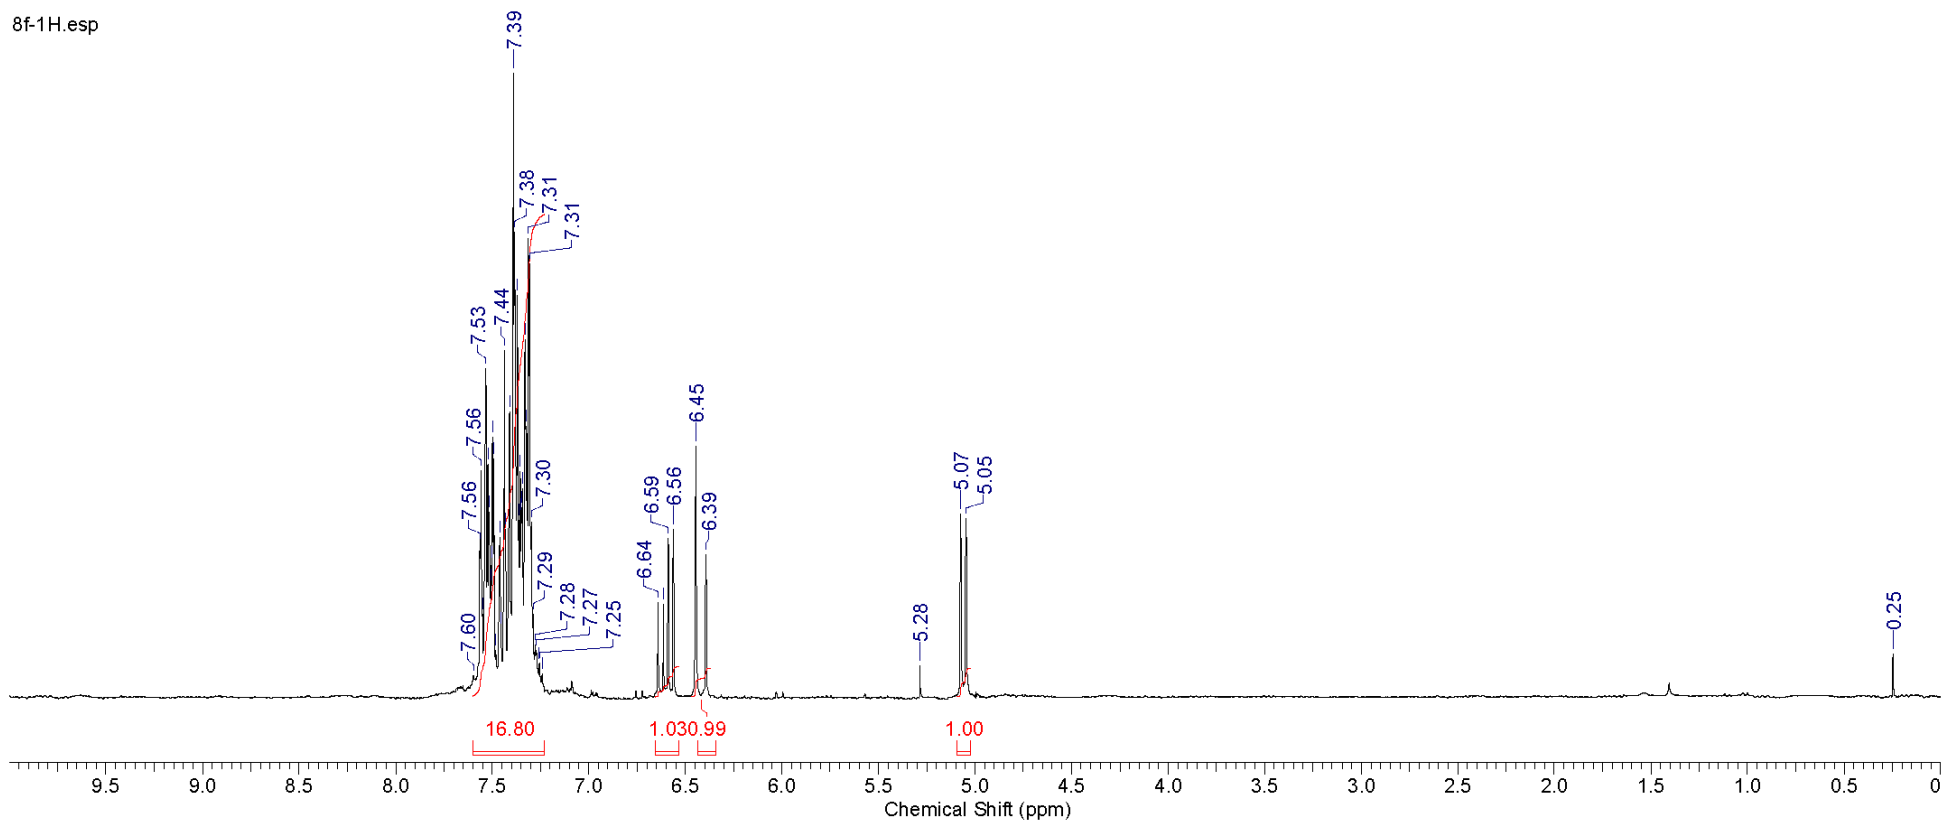



Formula C<sub>21</sub>H<sub>16</sub>S FW 302.4326

|                        |                                                      |              |           |                      |             |               |             |                      |          |
|------------------------|------------------------------------------------------|--------------|-----------|----------------------|-------------|---------------|-------------|----------------------|----------|
| Acquisition Time (sec) | 1.8150                                               | Comment      | CC120-13C | Date                 | Feb 25 2011 | Date Stamp    | Feb 25 2011 |                      |          |
| File Name              | C:\Users\User\Desktop\adam\CCclean\Cc120-13C.fid\fid |              |           | Frequency (MHz)      | 75.46       | Nucleus       | 13C         | Number of Transients | 5000     |
| Original Points Count  | 34053                                                | Points Count | 65536     | Pulse Sequence       | s2pul       | Receiver Gain | 33.00       |                      |          |
| Solvent                | CHLOROFORM-d                                         |              |           | Spectrum Offset (Hz) | 7527.6333   | Spectrum Type | STANDARD    | Sweep Width (Hz)     | 18761.73 |
| Temperature (degree C) | AMBIENT TEMPERATURE                                  |              |           |                      |             |               |             |                      |          |

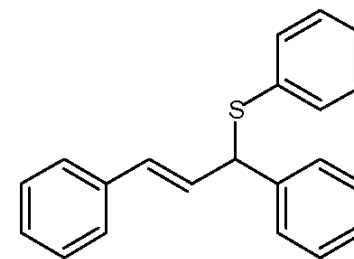

8f-13C.esp

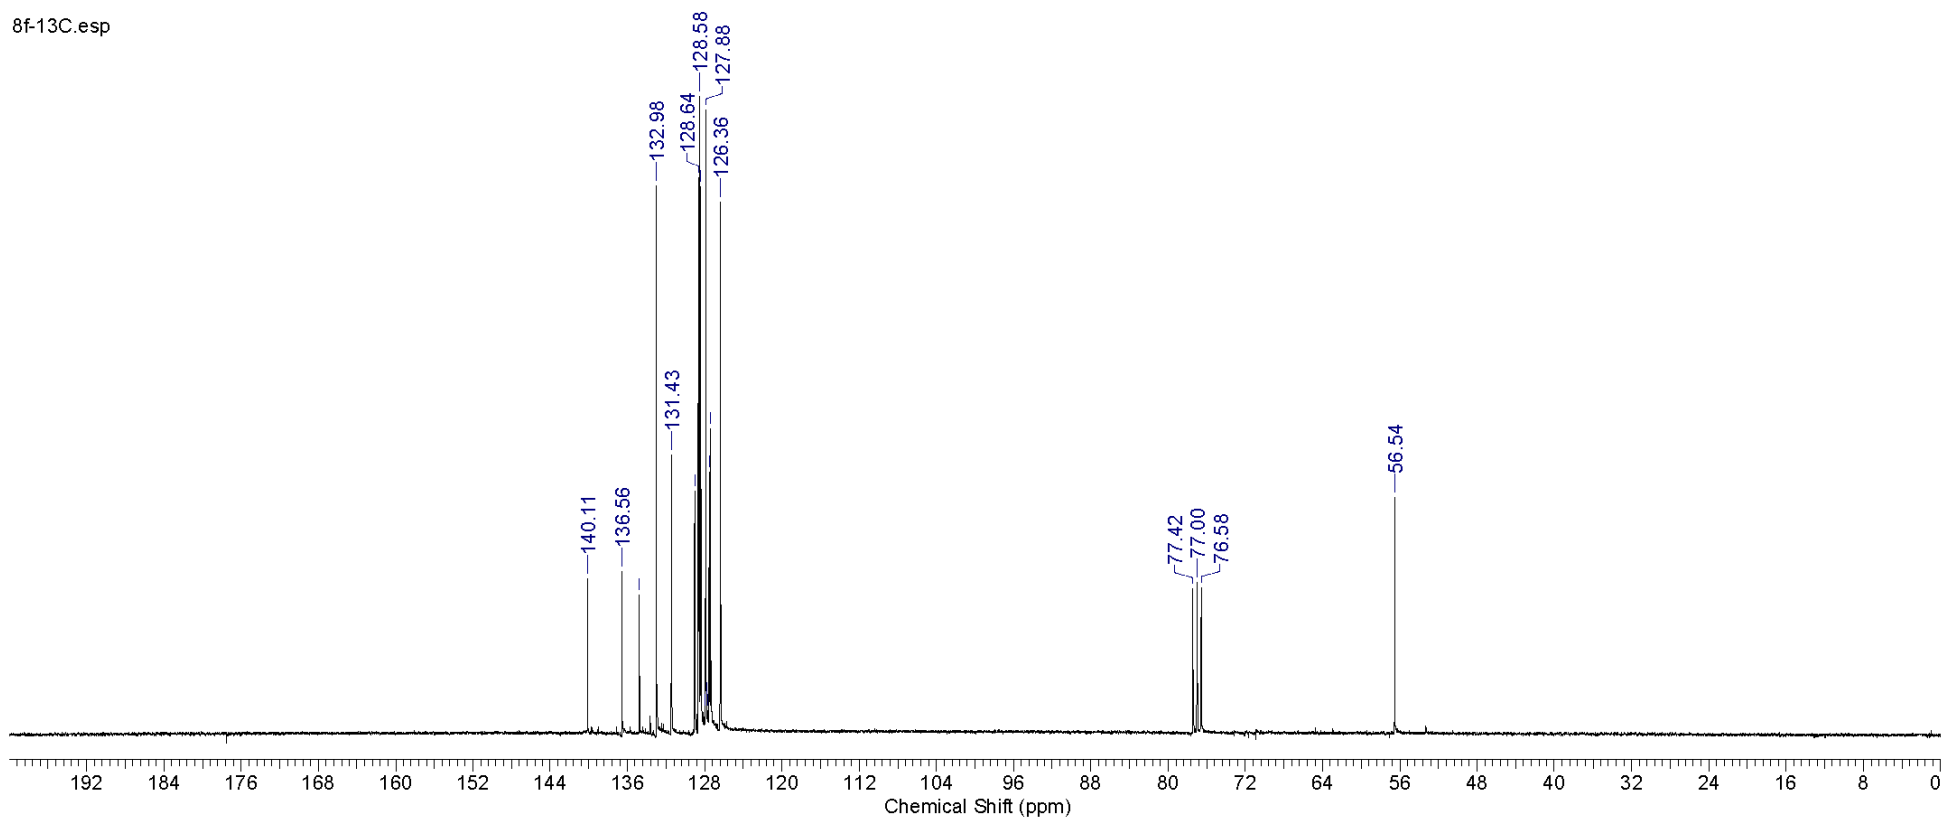

Formula C<sub>21</sub>H<sub>18</sub>O FW 286.3670

|                        |                                                      |               |          |                  |            |                        |                     |                      |              |
|------------------------|------------------------------------------------------|---------------|----------|------------------|------------|------------------------|---------------------|----------------------|--------------|
| Acquisition Time (sec) | 2.0000                                               | Comment       | cc65-1H  | Date             | Feb 8 2011 | Date Stamp             | Feb 8 2011          |                      |              |
| File Name              | C:\Users\User\Desktop\adam\CCclean\CC65-1H-2.fid\fid |               |          | Frequency (MHz)  | 300.08     | Nucleus                | 1H                  | Number of Transients | 1            |
| Original Points Count  | 9600                                                 | Points Count  | 16384    | Pulse Sequence   | s2pul      | Receiver Gain          | 14.00               | Solvent              | CHLOROFORM-d |
| Spectrum Offset (Hz)   | 1495.3453                                            | Spectrum Type | STANDARD | Sweep Width (Hz) | 4800.00    | Temperature (degree C) | AMBIENT TEMPERATURE |                      |              |

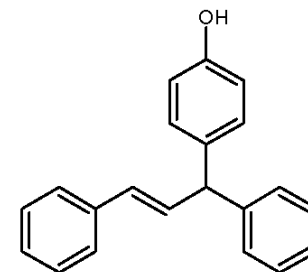

8g-1H.esp

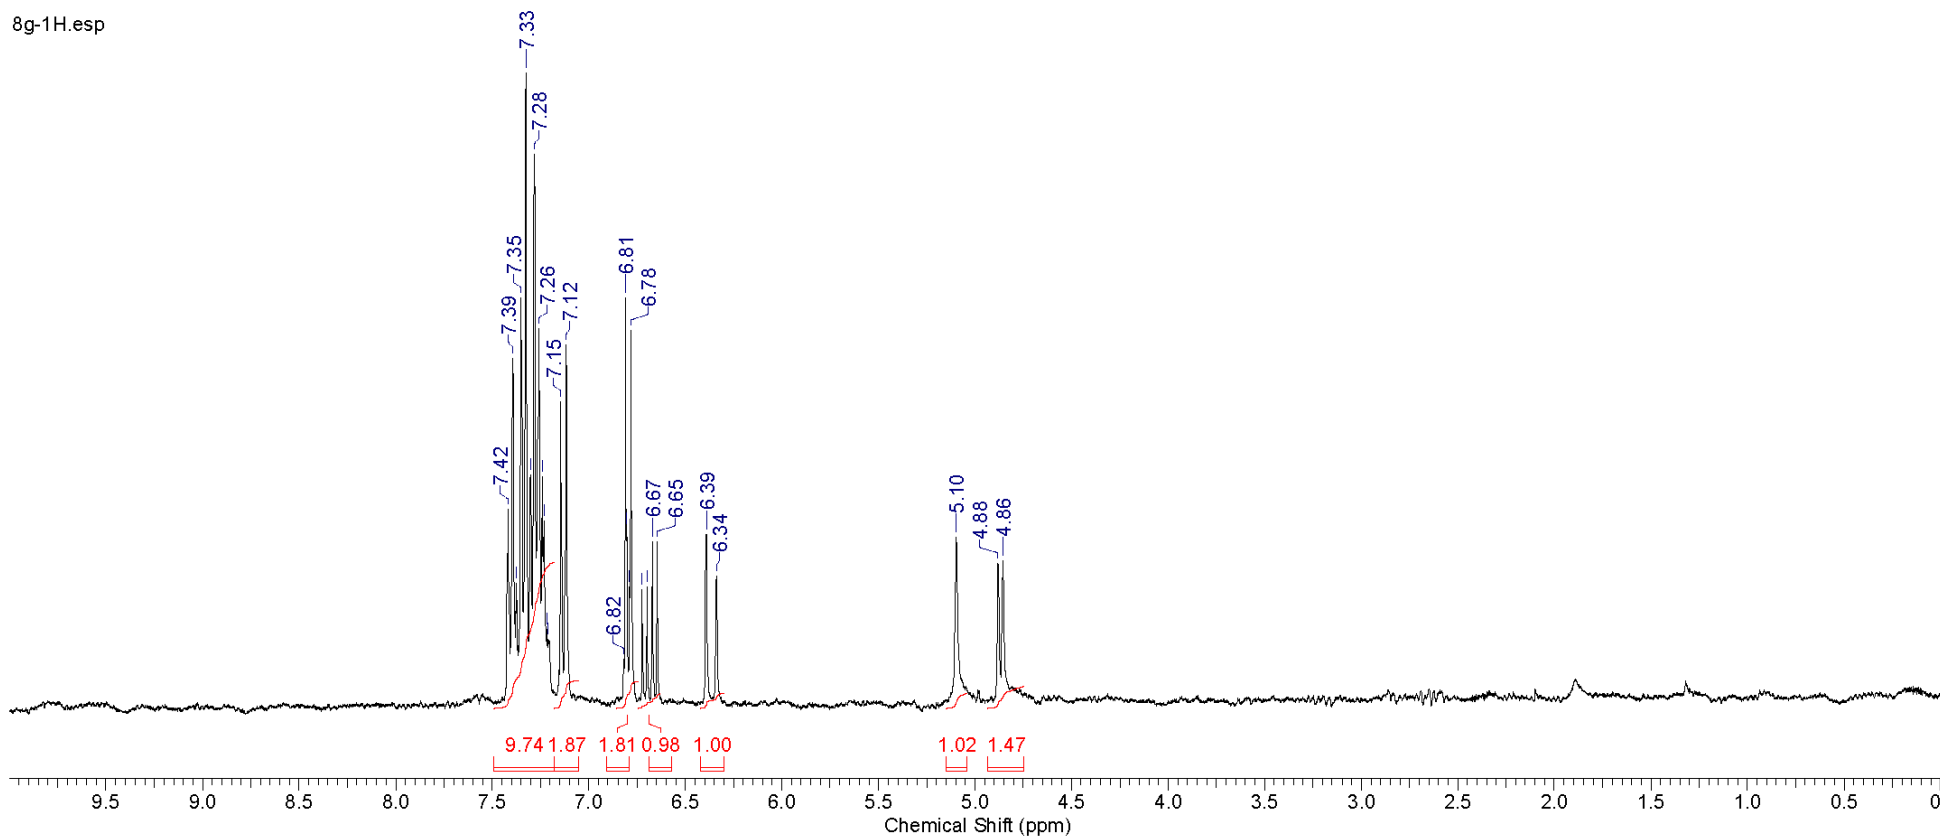

Formula C<sub>21</sub>H<sub>16</sub>O FW 286.3670

|                        |                                                     |              |          |                      |            |               |            |                      |          |
|------------------------|-----------------------------------------------------|--------------|----------|----------------------|------------|---------------|------------|----------------------|----------|
| Acquisition Time (sec) | 1.8150                                              | Comment      | CC65-13C | Date                 | Feb 9 2011 | Date Stamp    | Feb 9 2011 |                      |          |
| File Name              | C:\Users\User\Desktop\adam\CCclean\CC65-13C.fid\fid |              |          | Frequency (MHz)      | 75.46      | Nucleus       | 13C        | Number of Transients | 108      |
| Original Points Count  | 34053                                               | Points Count | 65536    | Pulse Sequence       | s2pul      | Receiver Gain | 30.00      |                      |          |
| Solvent                | CHLOROFORM-d                                        |              |          | Spectrum Offset (Hz) | 7537.3662  | Spectrum Type | STANDARD   | Sweep Width (Hz)     | 18761.73 |
| Temperature (degree C) | AMBIENT TEMPERATURE                                 |              |          |                      |            |               |            |                      |          |

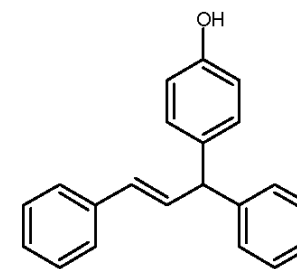

8g-13C.esp

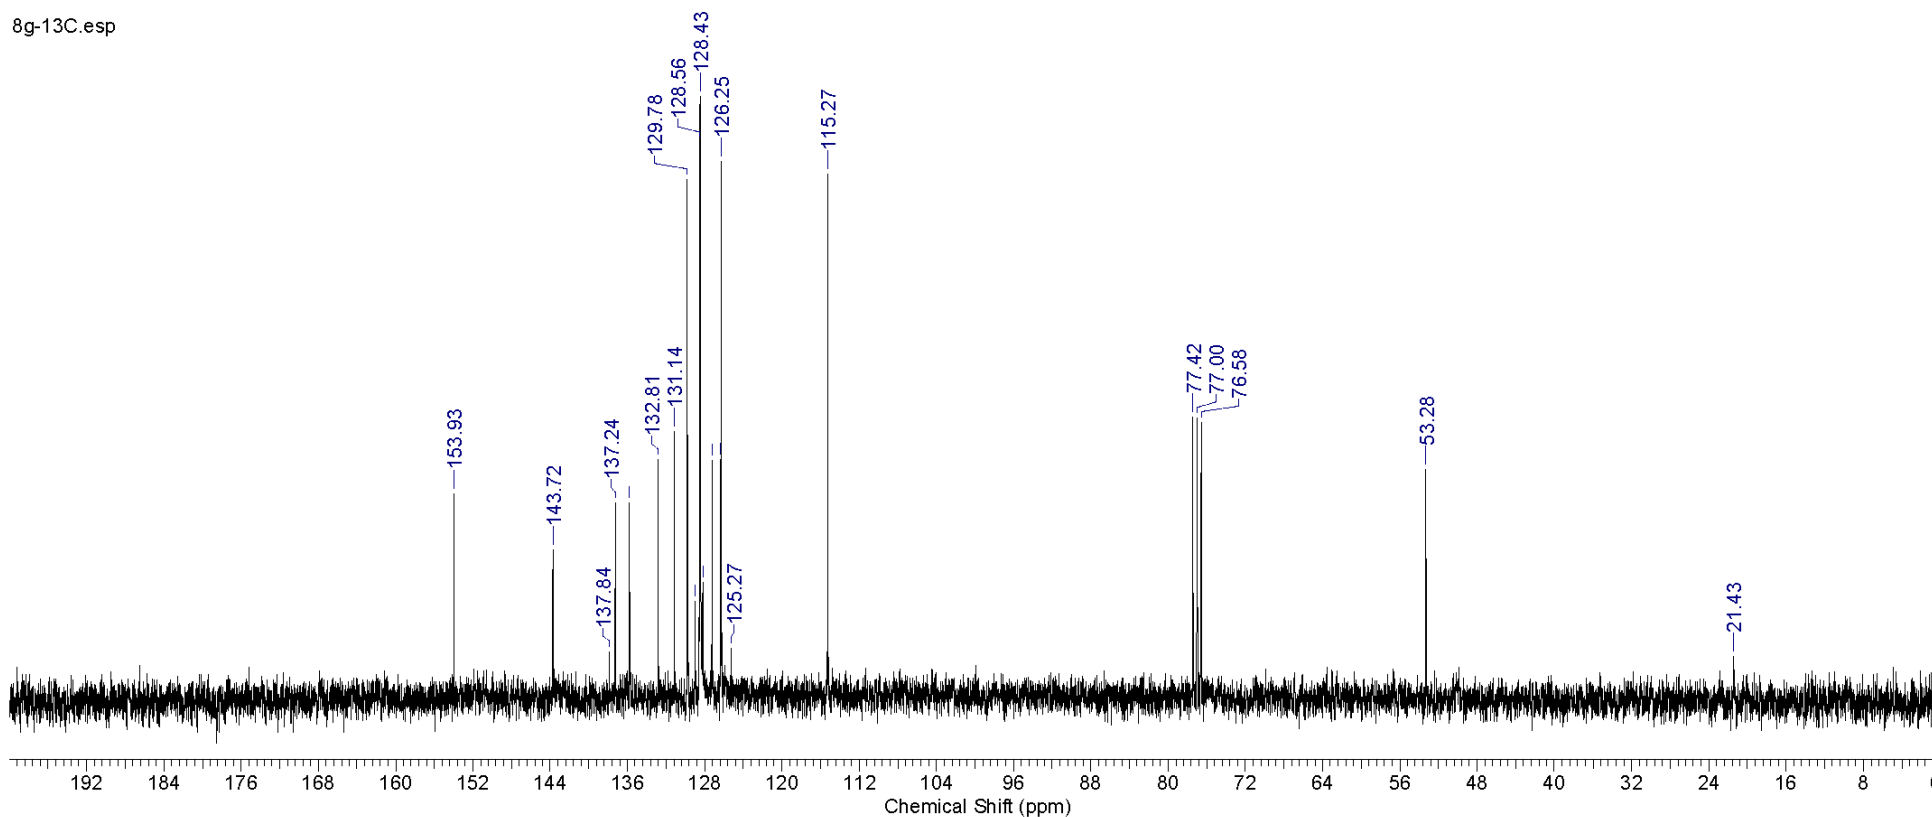

Formula C<sub>26</sub>H<sub>20</sub>O FW 336.4257

|                        |                                                    |               |          |                  |            |                        |                     |                      |              |
|------------------------|----------------------------------------------------|---------------|----------|------------------|------------|------------------------|---------------------|----------------------|--------------|
| Acquisition Time (sec) | 2.0000                                             | Comment       | CC64-1H  | Date             | Feb 7 2011 | Date Stamp             | Feb 7 2011          |                      |              |
| File Name              | C:\Users\User\Desktop\adam\CCclean\CC64-1H.fid\fid |               |          | Frequency (MHz)  | 300.08     | Nucleus                | 1H                  | Number of Transients | 1            |
| Original Points Count  | 9600                                               | Points Count  | 16384    | Pulse Sequence   | s2pul      | Receiver Gain          | 14.00               | Solvent              | CHLOROFORM-d |
| Spectrum Offset (Hz)   | 1494.7594                                          | Spectrum Type | STANDARD | Sweep Width (Hz) | 4800.00    | Temperature (degree C) | AMBIENT TEMPERATURE |                      |              |

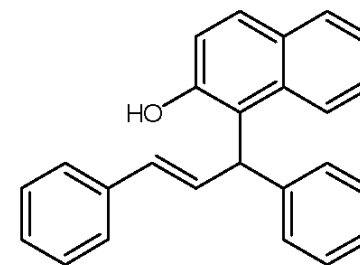

8h-1H.esp

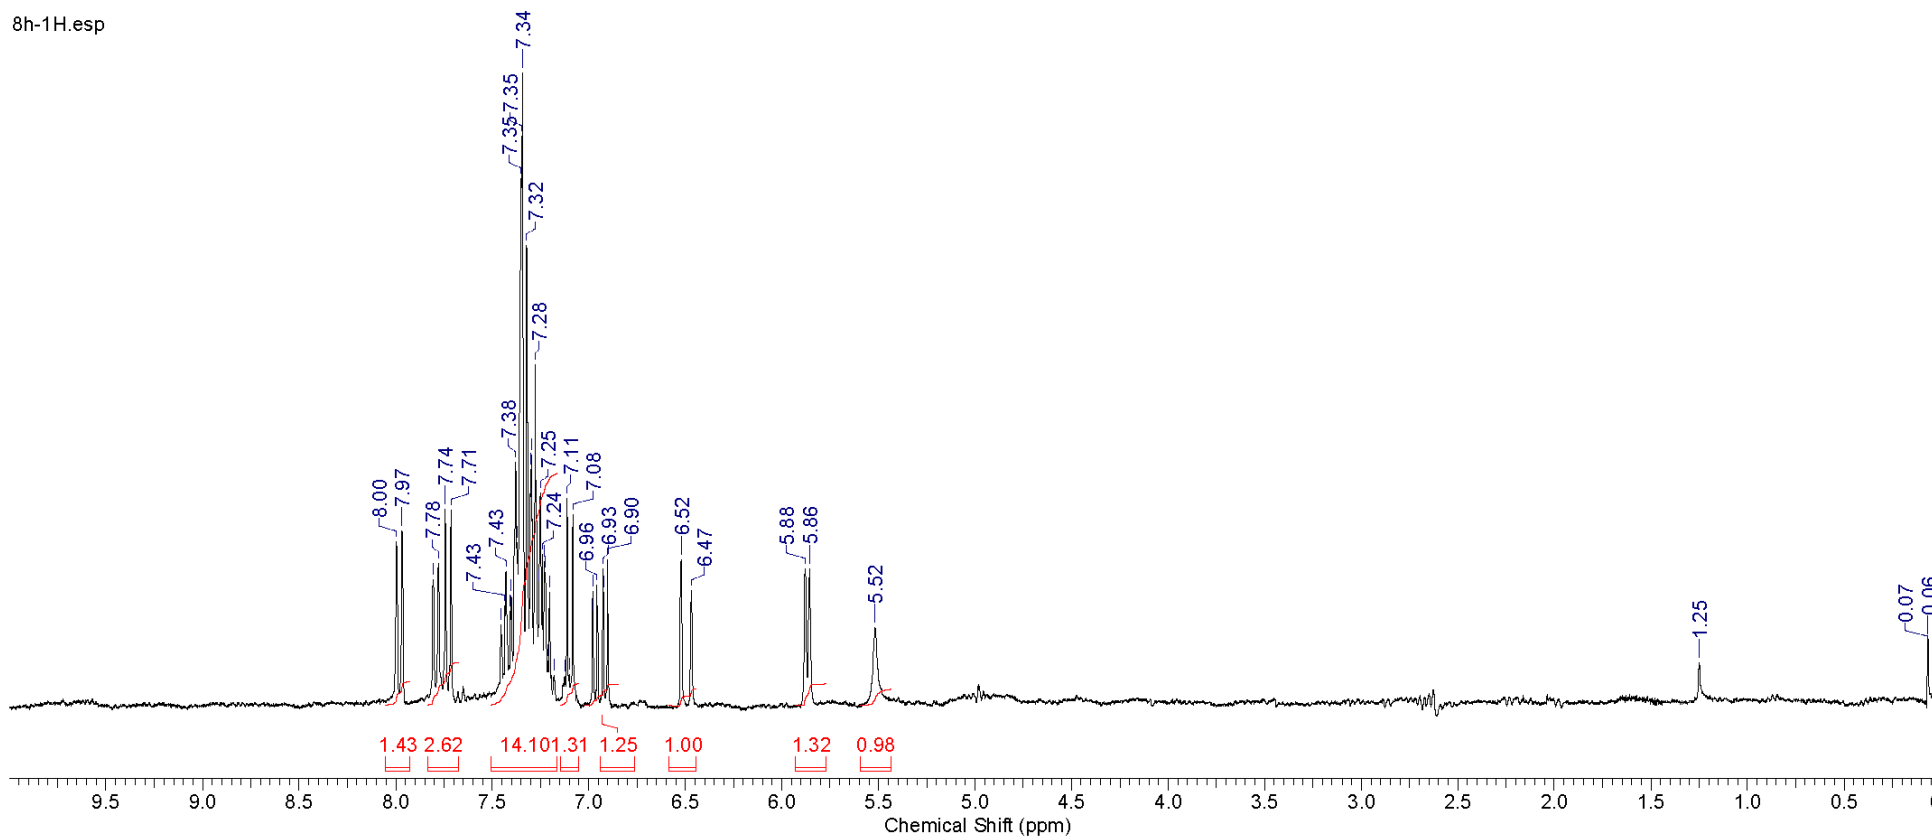

Formula C<sub>26</sub>H<sub>20</sub>O FW 336.4257

|                        |                                                     |                                            |          |                      |            |               |            |
|------------------------|-----------------------------------------------------|--------------------------------------------|----------|----------------------|------------|---------------|------------|
| Acquisition Time (sec) | 1.8150                                              | Comment                                    | CC64-13C | Date                 | Feb 7 2011 | Date Stamp    | Feb 7 2011 |
| File Name              | C:\Users\User\Desktop\adam\CCclean\CC64-13C.fid\fid |                                            |          | Frequency (MHz)      | 75.46      | Nucleus       | 13C        |
| Original Points Count  | 34053                                               | Points Count                               | 65536    | Pulse Sequence       | s2pul      | Receiver Gain | 28.00      |
| Solvent                | CHLOROFORM-d                                        |                                            |          | Spectrum Offset (Hz) | 7531.0684  | Spectrum Type | STANDARD   |
| Sweep Width (Hz)       | 18761.73                                            | Temperature (degree C) AMBIENT TEMPERATURE |          |                      |            |               |            |

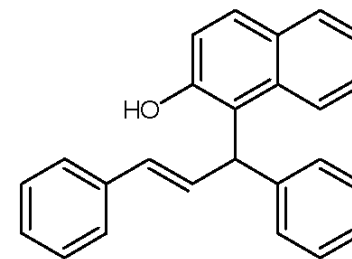

8h-13C.esp

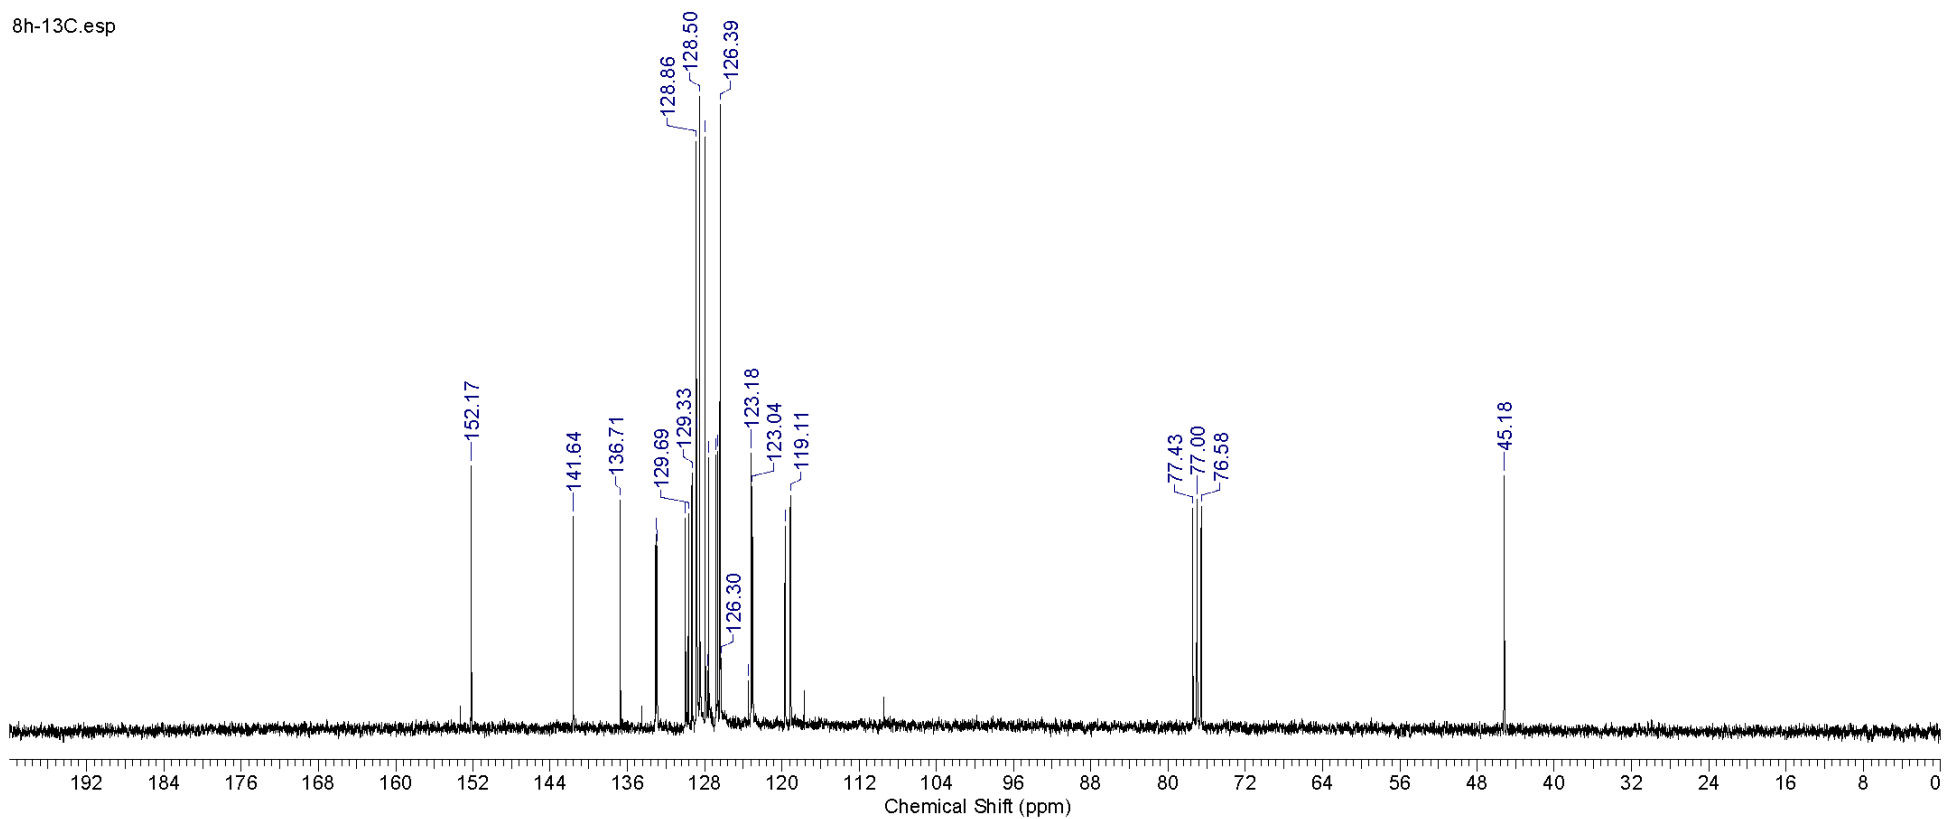

Formula C<sub>23</sub>H<sub>19</sub>N FW 309.4037

|                        |                                                    |               |          |                  |            |                        |                     |                      |              |
|------------------------|----------------------------------------------------|---------------|----------|------------------|------------|------------------------|---------------------|----------------------|--------------|
| Acquisition Time (sec) | 2.0000                                             | Comment       | CC66-1H  | Date             | Feb 9 2011 | Date Stamp             | Feb 9 2011          |                      |              |
| File Name              | C:\Users\User\Desktop\adam\CCclean\CC66-1H.fid\fid |               |          | Frequency (MHz)  | 300.08     | Nucleus                | 1H                  | Number of Transients | 1            |
| Original Points Count  | 9600                                               | Points Count  | 16384    | Pulse Sequence   | s2pul      | Receiver Gain          | 13.00               | Solvent              | CHLOROFORM-d |
| Spectrum Offset (Hz)   | 1495.6384                                          | Spectrum Type | STANDARD | Sweep Width (Hz) | 4800.00    | Temperature (degree C) | AMBIENT TEMPERATURE |                      |              |

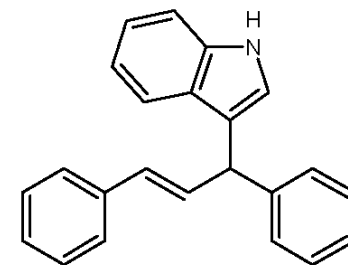

8i-1H.esp

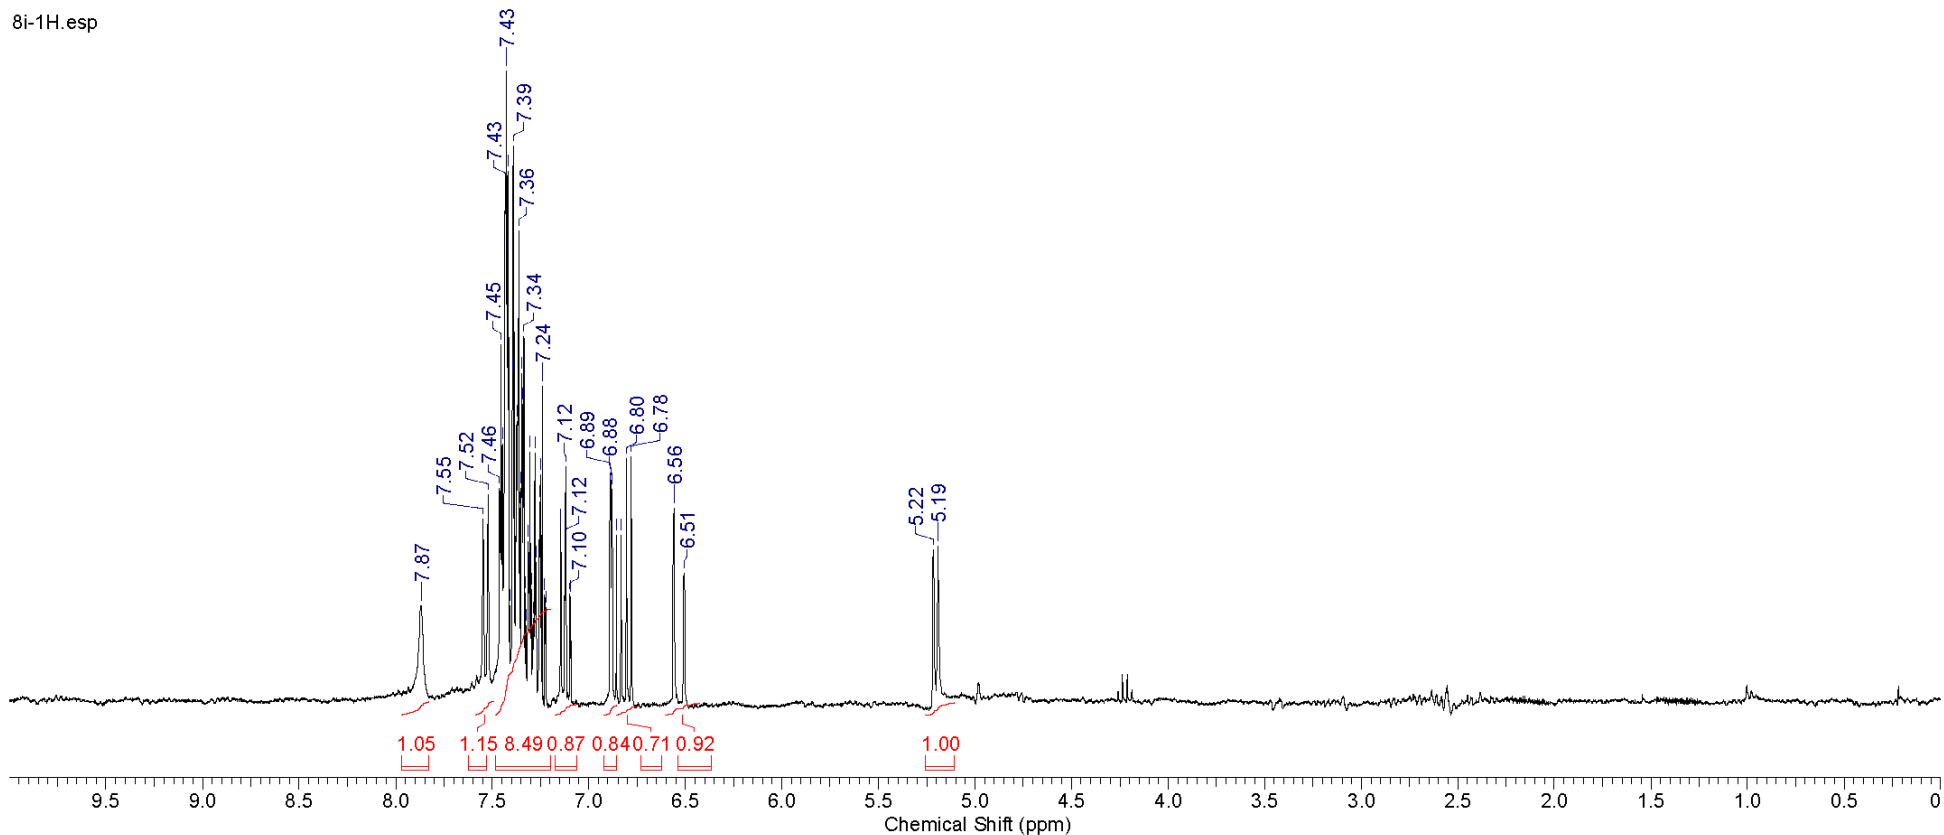

Formula C<sub>23</sub>H<sub>19</sub>N FW 309.4037

|                        |                                                     |              |          |                      |            |               |            |                      |          |
|------------------------|-----------------------------------------------------|--------------|----------|----------------------|------------|---------------|------------|----------------------|----------|
| Acquisition Time (sec) | 1.8150                                              | Comment      | CC66-13C | Date                 | Feb 9 2011 | Date Stamp    | Feb 9 2011 |                      |          |
| File Name              | C:\Users\User\Desktop\adam\CCclean\CC66-13C.fid\fid |              |          | Frequency (MHz)      | 75.46      | Nucleus       | 13C        | Number of Transients | 816      |
| Original Points Count  | 34053                                               | Points Count | 65536    | Pulse Sequence       | s2pul      | Receiver Gain | 30.00      |                      |          |
| Solvent                | CHLOROFORM-d                                        |              |          | Spectrum Offset (Hz) | 7532.2134  | Spectrum Type | STANDARD   | Sweep Width (Hz)     | 18761.73 |
| Temperature (degree C) | AMBIENT TEMPERATURE                                 |              |          |                      |            |               |            |                      |          |

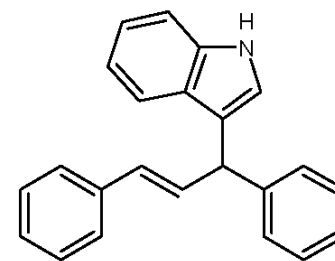

8i-13C.esp

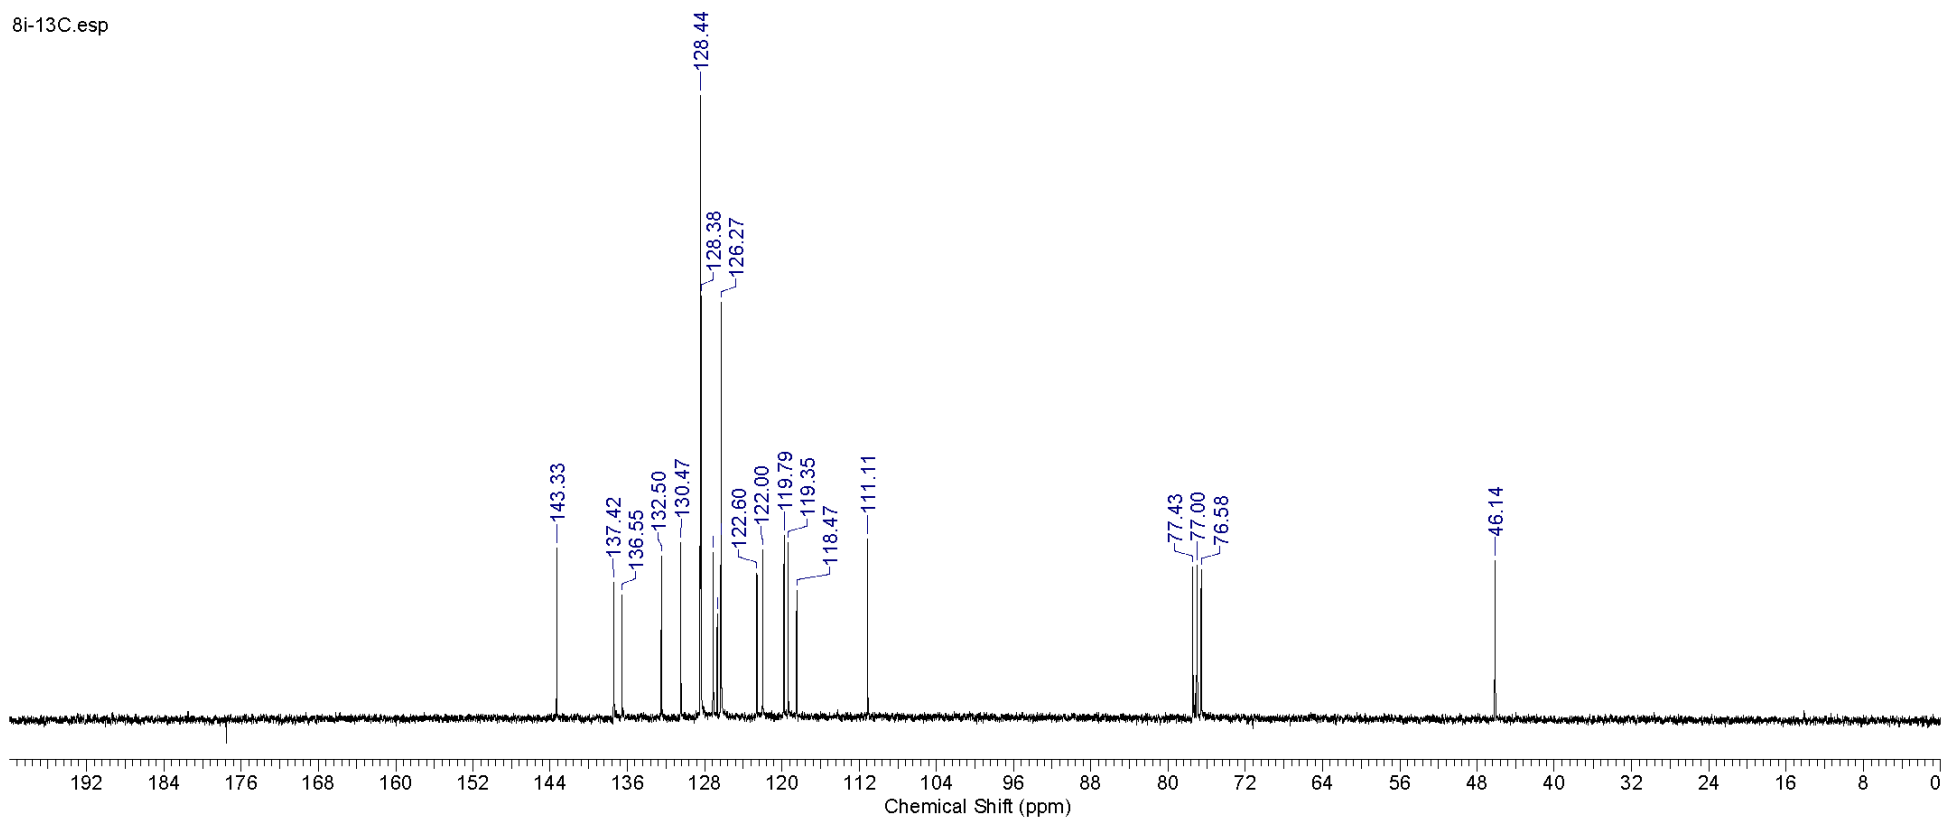

Formula C<sub>20</sub>H<sub>19</sub>NO<sub>2</sub>S FW 337.4354

|                        |                                                     |               |          |                  |            |                        |                     |                      |              |
|------------------------|-----------------------------------------------------|---------------|----------|------------------|------------|------------------------|---------------------|----------------------|--------------|
| Acquisition Time (sec) | 2.0000                                              | Comment       | CC180-1H | Date             | Nov 8 2011 | Date Stamp             | Nov 8 2011          |                      |              |
| File Name              | C:\Users\User\Desktop\adam\CCclean\CC180-1H.fid\fid |               |          | Frequency (MHz)  | 300.08     | Nucleus                | 1H                  | Number of Transients | 4            |
| Original Points Count  | 9600                                                | Points Count  | 16384    | Pulse Sequence   | s2pul      | Receiver Gain          | 11.00               | Solvent              | CHLOROFORM-d |
| Spectrum Offset (Hz)   | 1495.6384                                           | Spectrum Type | STANDARD | Sweep Width (Hz) | 4800.00    | Temperature (degree C) | AMBIENT TEMPERATURE |                      |              |

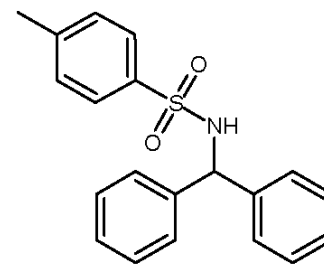

9a-1H.esp

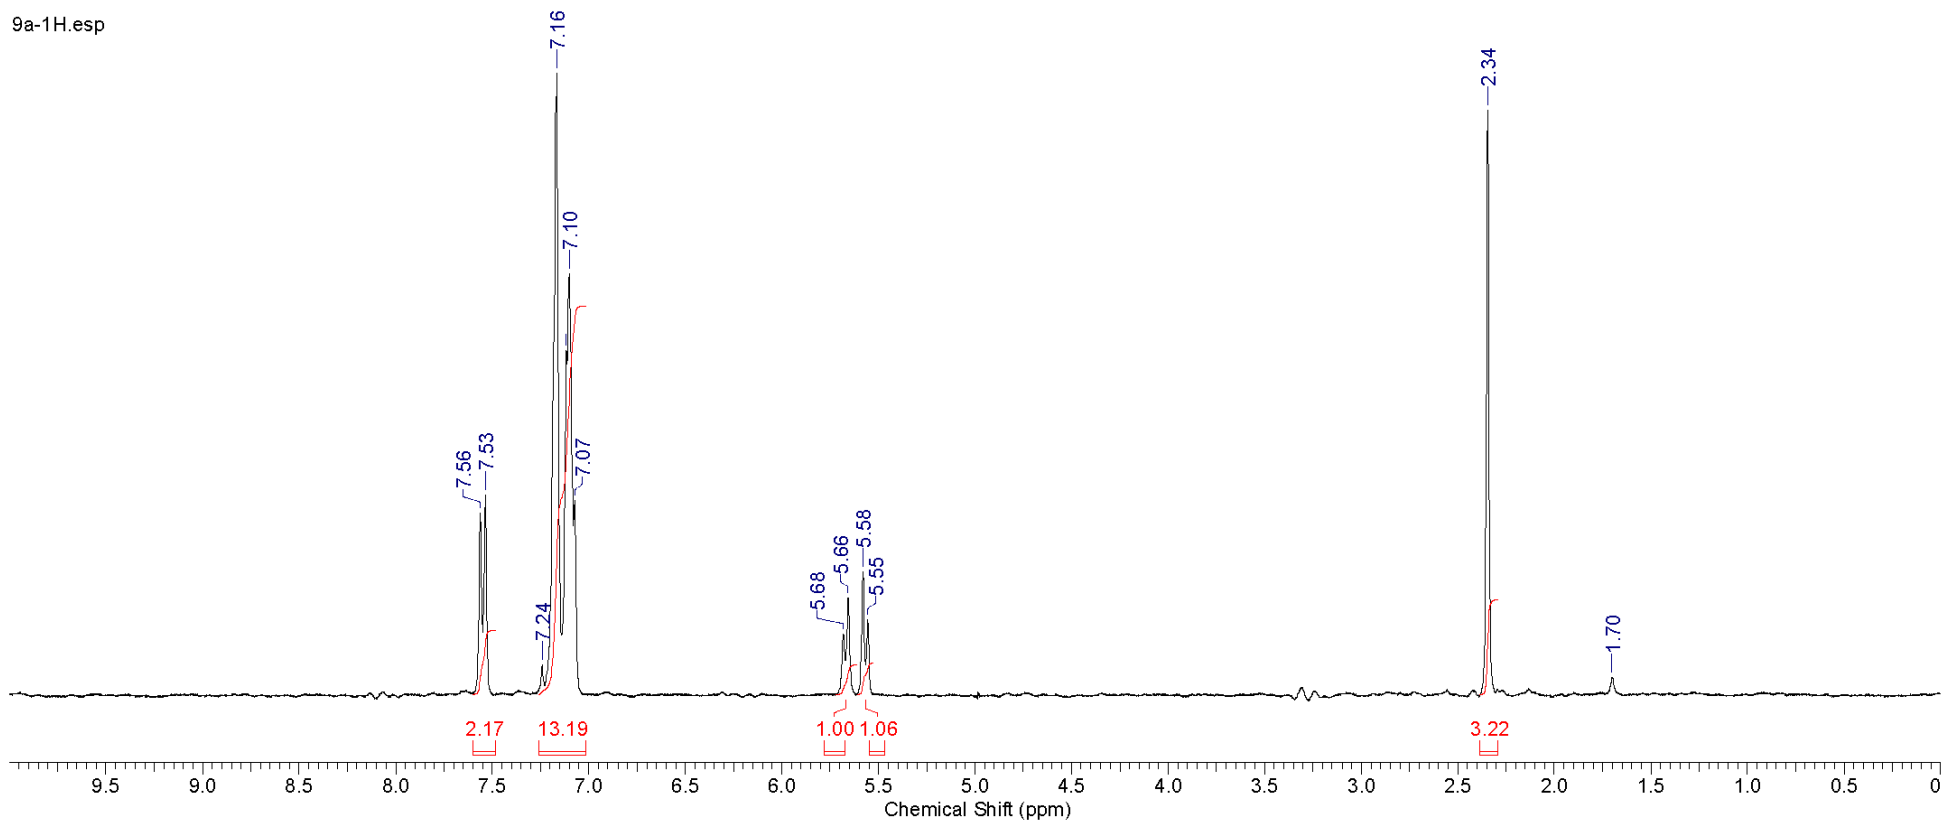



Formula C<sub>20</sub>H<sub>19</sub>NO<sub>2</sub>S FW 337.4354

|                        |                                                      |              |          |                      |            |               |            |                      |          |
|------------------------|------------------------------------------------------|--------------|----------|----------------------|------------|---------------|------------|----------------------|----------|
| Acquisition Time (sec) | 1.8150                                               | Comment      | CC18-13C | Date                 | Nov 8 2011 | Date Stamp    | Nov 8 2011 |                      |          |
| File Name              | C:\Users\User\Desktop\adam\CCclean\CC180-13C.fid\fid |              |          | Frequency (MHz)      | 75.46      | Nucleus       | 13C        | Number of Transients | 108      |
| Original Points Count  | 34053                                                | Points Count | 65536    | Pulse Sequence       | s2pul      | Receiver Gain | 30.00      |                      |          |
| Solvent                | CHLOROFORM-d                                         |              |          | Spectrum Offset (Hz) | 7537.6597  | Spectrum Type | STANDARD   | Sweep Width (Hz)     | 18761.73 |
| Temperature (degree C) | AMBIENT TEMPERATURE                                  |              |          |                      |            |               |            |                      |          |

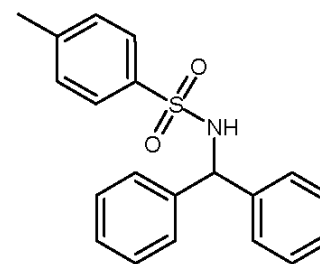

9a-13C.esp

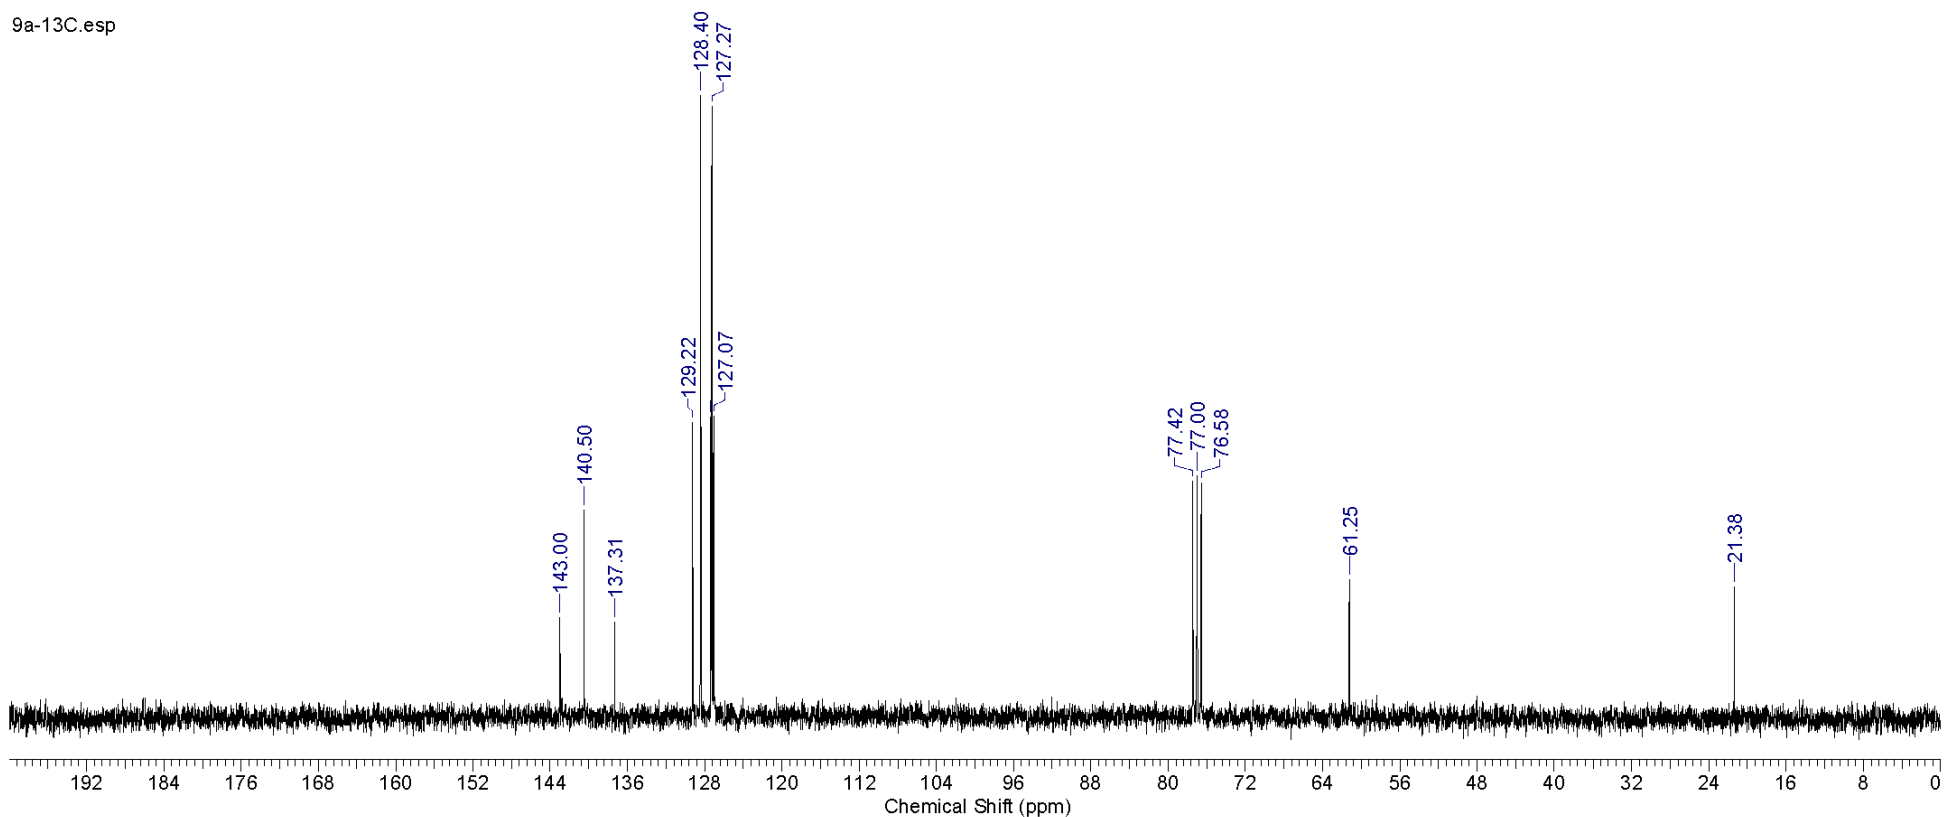

Formula C<sub>22</sub>H<sub>21</sub>NO<sub>2</sub>S FW 363.4726

|                        |                                                     |               |          |                  |            |                        |                     |                      |              |
|------------------------|-----------------------------------------------------|---------------|----------|------------------|------------|------------------------|---------------------|----------------------|--------------|
| Acquisition Time (sec) | 2.0000                                              | Comment       | CC181-1H | Date             | Nov 8 2011 | Date Stamp             | Nov 8 2011          |                      |              |
| File Name              | C:\Users\User\Desktop\adam\CCclean\CC181-1H.fid\fid |               |          | Frequency (MHz)  | 300.08     | Nucleus                | 1H                  | Number of Transients | 4            |
| Original Points Count  | 9600                                                | Points Count  | 16384    | Pulse Sequence   | s2pul      | Receiver Gain          | 10.00               | Solvent              | CHLOROFORM-d |
| Spectrum Offset (Hz)   | 1494.8887                                           | Spectrum Type | STANDARD | Sweep Width (Hz) | 4800.00    | Temperature (degree C) | AMBIENT TEMPERATURE |                      |              |

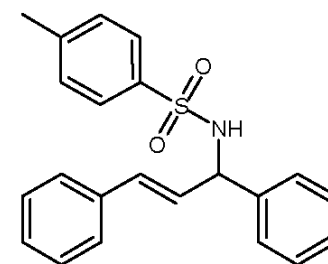

9b-1H.esp

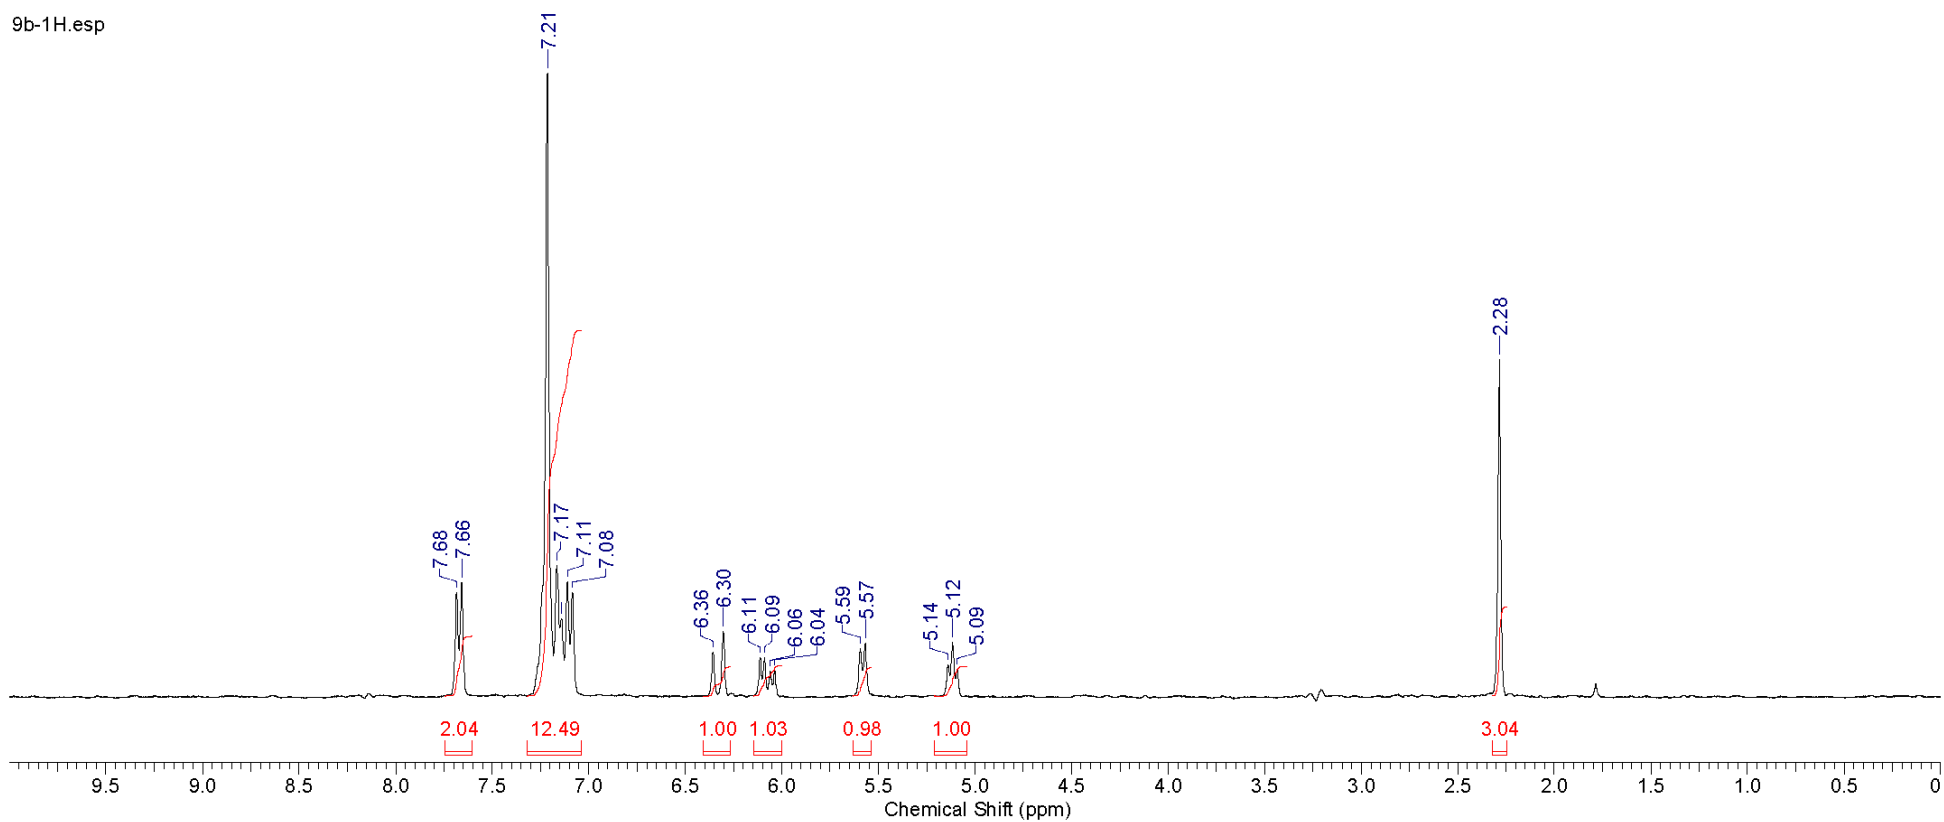

Formula C<sub>22</sub>H<sub>21</sub>NO<sub>2</sub>S FW 363.4726

|                        |                                                      |              |           |                      |            |               |            |                      |          |
|------------------------|------------------------------------------------------|--------------|-----------|----------------------|------------|---------------|------------|----------------------|----------|
| Acquisition Time (sec) | 1.8150                                               | Comment      | CC181-13C | Date                 | Nov 8 2011 | Date Stamp    | Nov 8 2011 |                      |          |
| File Name              | C:\Users\User\Desktop\adam\CCclean\CC181-13C.fid\fid |              |           | Frequency (MHz)      | 75.46      | Nucleus       | 13C        | Number of Transients | 6964     |
| Original Points Count  | 34053                                                | Points Count | 65536     | Pulse Sequence       | s2pul      | Receiver Gain | 30.00      |                      |          |
| Solvent                | CHLOROFORM-d                                         |              |           | Spectrum Offset (Hz) | 7535.0762  | Spectrum Type | STANDARD   | Sweep Width (Hz)     | 18761.73 |
| Temperature (degree C) | AMBIENT TEMPERATURE                                  |              |           |                      |            |               |            |                      |          |

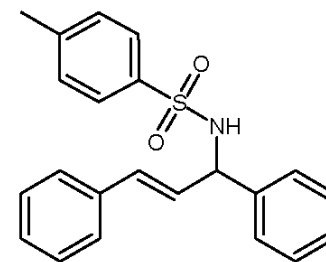

9b-13C.esp

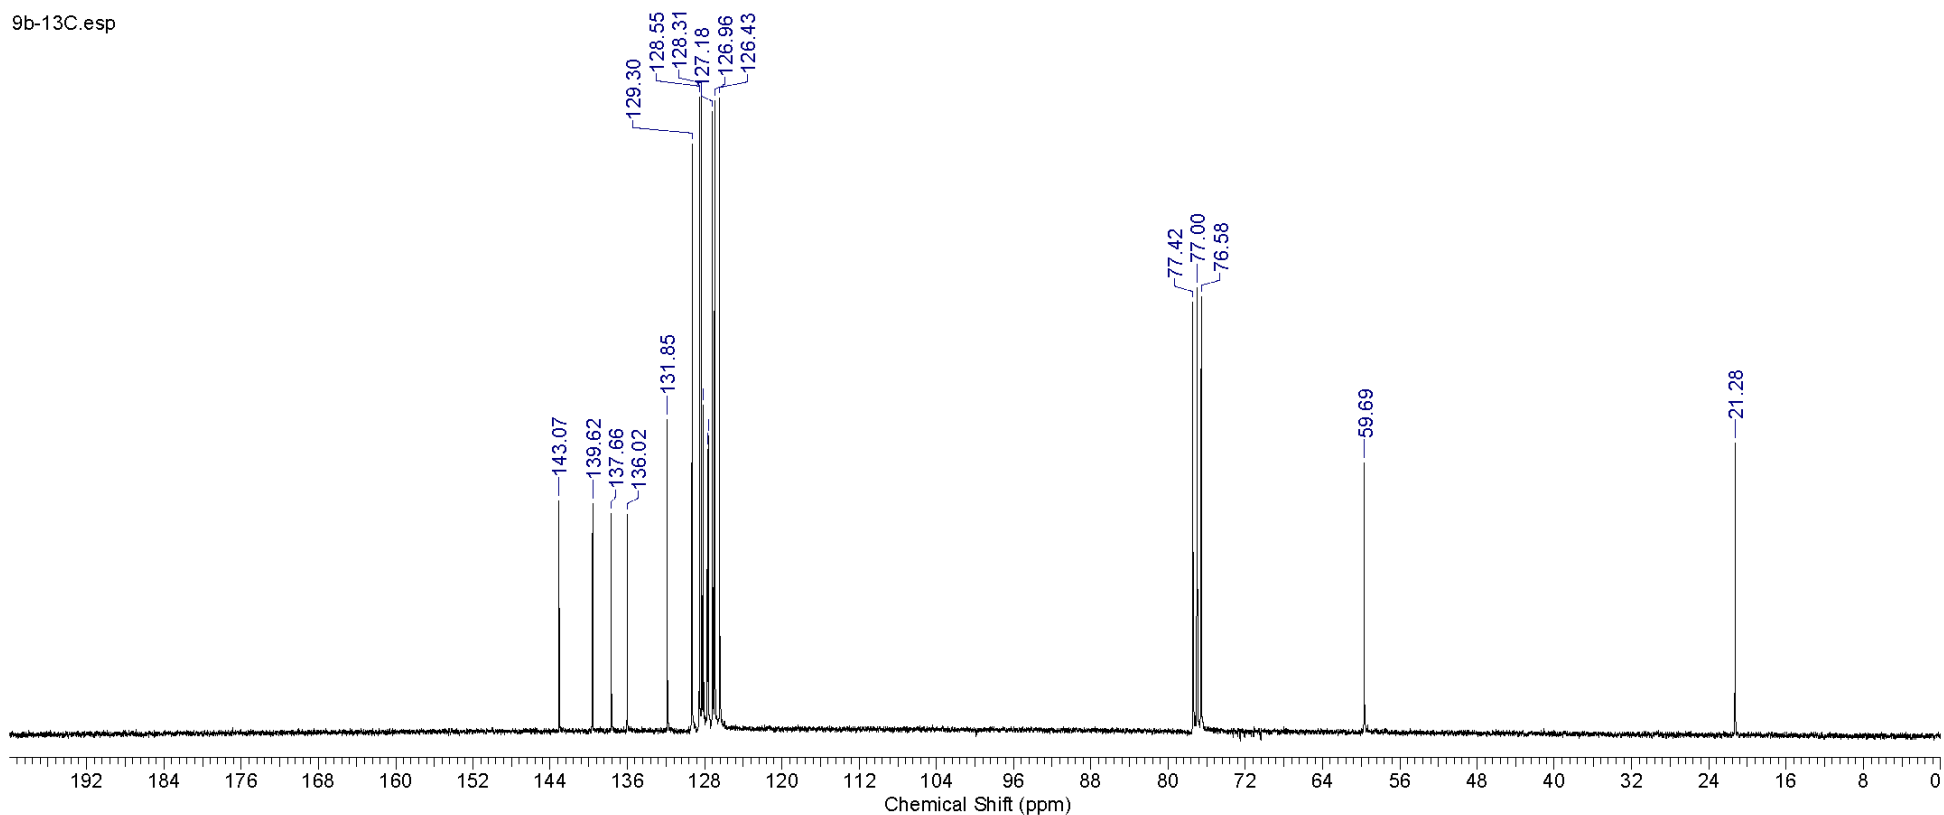

Formula C<sub>15</sub>H<sub>14</sub>O<sub>2</sub> FW 226.2705

|                        |                      |                      |                                           |                        |                      |
|------------------------|----------------------|----------------------|-------------------------------------------|------------------------|----------------------|
| Acquisition Time (sec) | 3.9846               | Comment              | CC92-1H-DMSO                              | Date                   | 20 Oct 2010 16:53:52 |
| Date Stamp             | 20 Oct 2010 16:53:52 | File Name            | C:\Users\User\Desktop\adam\nmr\CC92\7\fid | Frequency (MHz)        | 400.17               |
| Nucleus                | 1H                   | Number of Transients | 16                                        | Origin                 | spect                |
| Points Count           | 32768                | Pulse Sequence       | zg30                                      | Receiver Gain          | 64.00                |
| Spectrum Offset (Hz)   | 2465.7646            | Spectrum Type        | STANDARD                                  | SW(cyclical) (Hz)      | 8223.43              |
|                        |                      |                      |                                           | Temperature (degree C) | 24.500               |
|                        |                      |                      |                                           | Original Points Count  | 32768                |
|                        |                      |                      |                                           | Owner                  | nmrsu                |
|                        |                      |                      |                                           | Solvent                | DMSO-d6              |

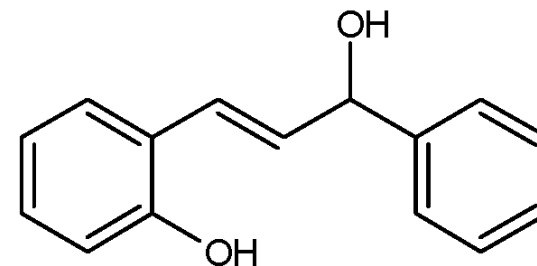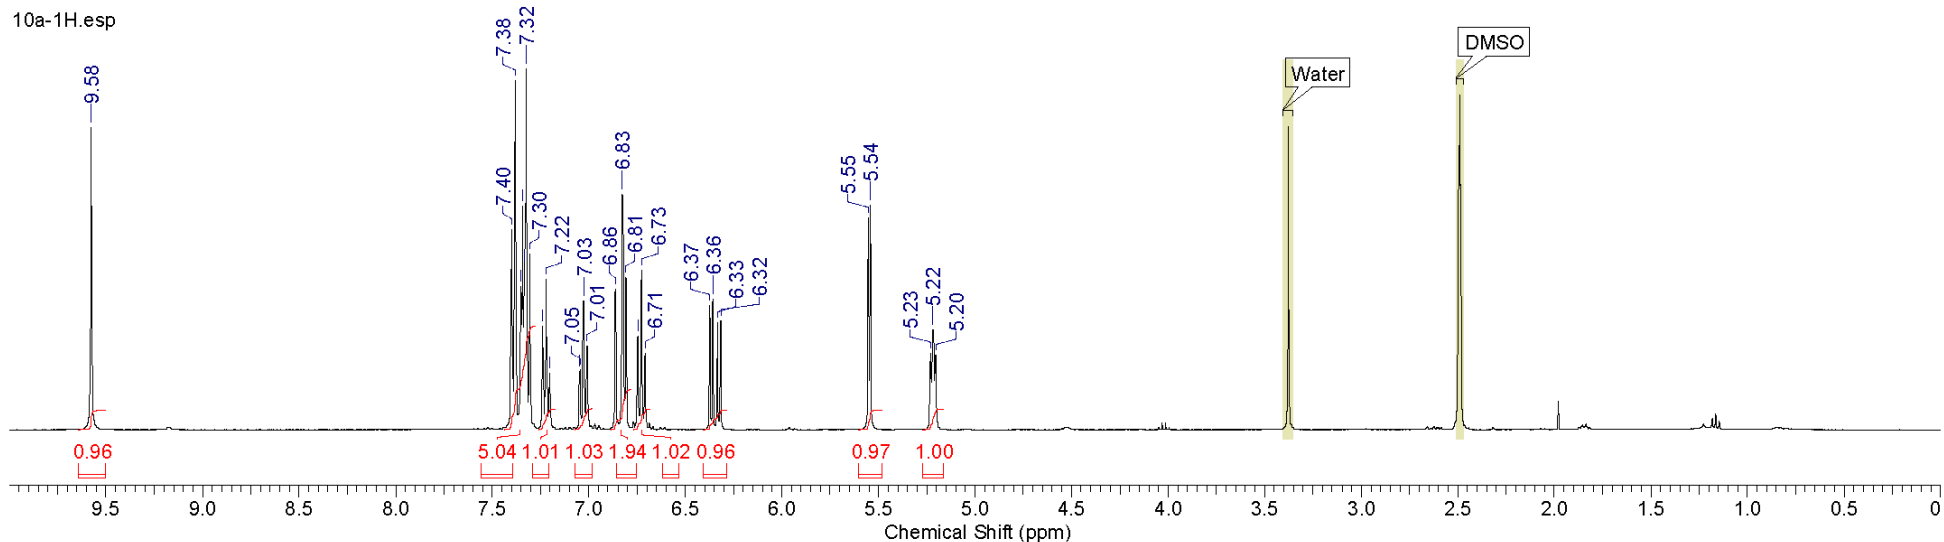

| No. | (ppm)          | Annotation | Layer No. | Created By | Created At                 | Modified By | Modified At |
|-----|----------------|------------|-----------|------------|----------------------------|-------------|-------------|
| 1   | [2.47 .. 2.51] | DMSO       | 1         | User       | Fri 2012/03/23 03:13:33 PM |             |             |
| 2   | [3.36 .. 3.40] | Water      | 1         | User       | Fri 2012/03/23 03:13:33 PM |             |             |

Formula  $C_{15}H_{14}O_2$  FW 226.2705

|                        |                      |                      |                                           |                  |                      |                        |          |         |         |
|------------------------|----------------------|----------------------|-------------------------------------------|------------------|----------------------|------------------------|----------|---------|---------|
| Acquisition Time (sec) | 1.3631               | Comment              | 5 mm PABBO BB-1H/D Z-GRD Z108618/0217     | Date             | 20 Oct 2010 23:00:48 |                        |          |         |         |
| Date Stamp             | 20 Oct 2010 23:00:48 | File Name            | C:\Users\User\Desktop\adam\nmr\CC92\8\fid | Frequency (MHz)  | 100.62               |                        |          |         |         |
| Nucleus                | 13C                  | Number of Transients | 5500                                      | Origin           | spect                | Original Points Count  | 32768    | Owner   | nmrsu   |
| Points Count           | 32768                | Pulse Sequence       | zgig30                                    | Receiver Gain    | 101.00               | SW(cyclical) (Hz)      | 24038.46 | Solvent | DMSO-d6 |
| Spectrum Offset (Hz)   | 10013.3662           | Spectrum Type        | STANDARD                                  | Sweep Width (Hz) | 24037.73             | Temperature (degree C) | 23.400   |         |         |



10a-13C.esp

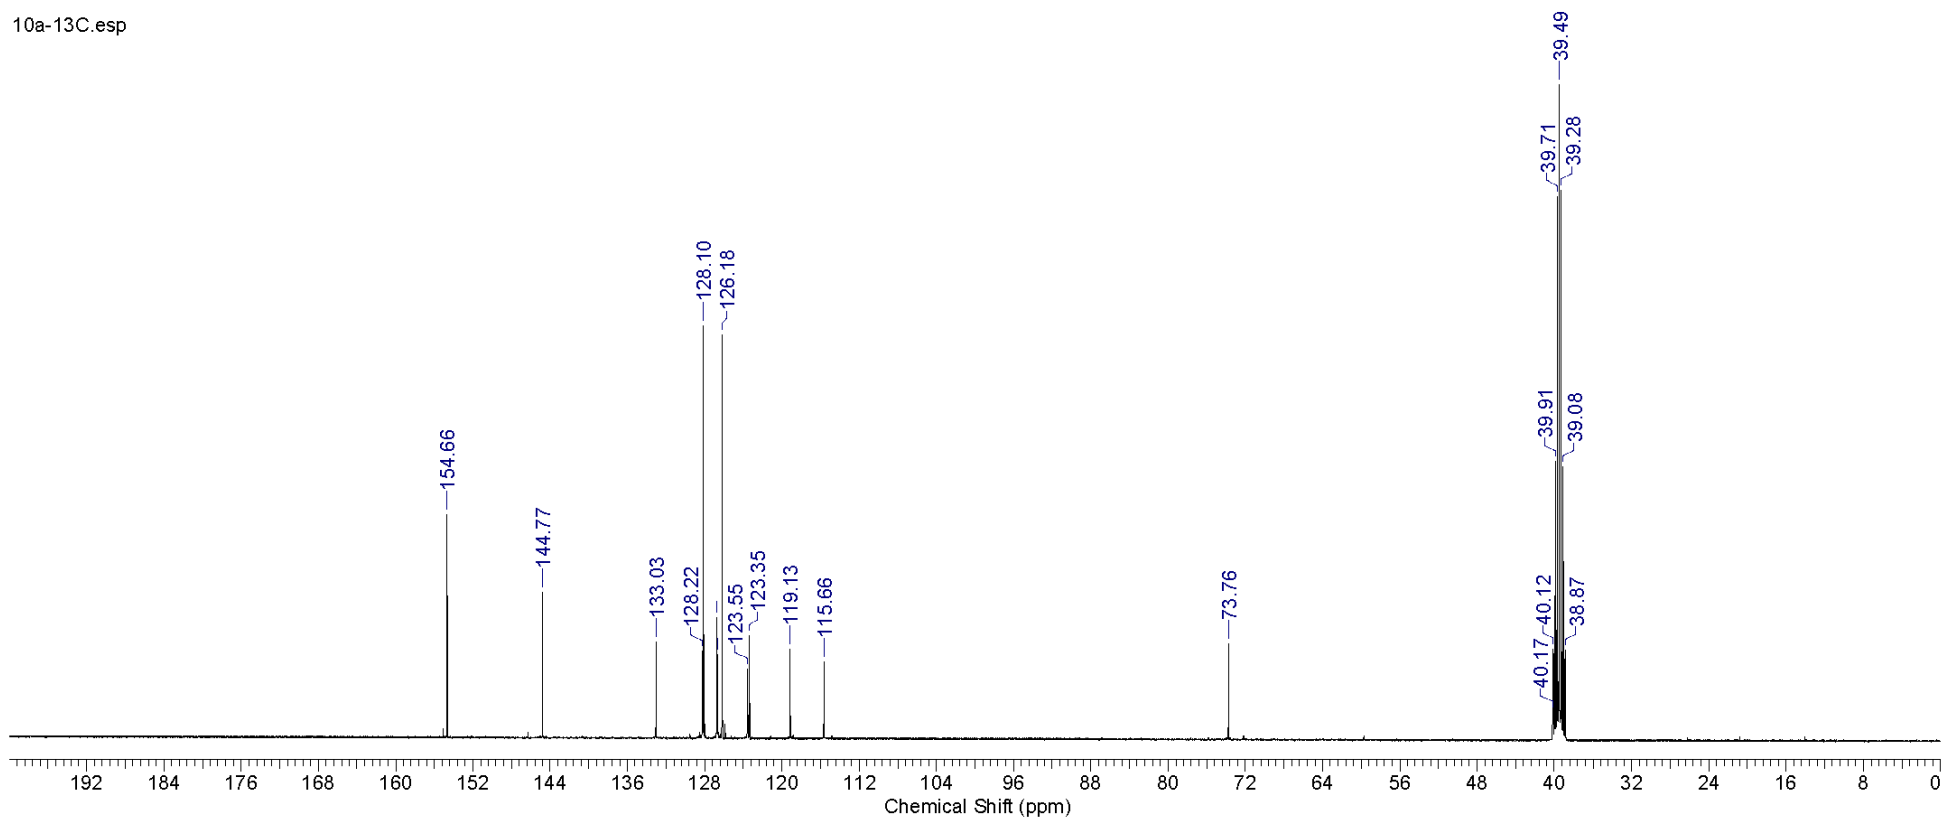

Formula C<sub>19</sub>H<sub>16</sub>O<sub>2</sub> FW 276.3291

|                        |                                                          |                       |               |                 |             |                  |             |
|------------------------|----------------------------------------------------------|-----------------------|---------------|-----------------|-------------|------------------|-------------|
| Acquisition Time (sec) | 2.0000                                                   | Comment               | CC109-1H-DMSO | Date            | Feb 28 2011 | Date Stamp       | Feb 28 2011 |
| File Name              | C:\Users\User\Desktop\adam\CCclean\CC109-1H-DMSO.fid\fid |                       |               | Frequency (MHz) | 300.08      | Nucleus          | 1H          |
| Number of Transients   | 8                                                        | Original Points Count | 9600          | Points Count    | 16384       | Pulse Sequence   | s2pul       |
| Solvent                | DMSO-d6                                                  | Spectrum Offset (Hz)  | 1505.6711     | Spectrum Type   | STANDARD    | Sweep Width (Hz) | 4800.00     |
| Temperature (degree C) | AMBIENT TEMPERATURE                                      |                       |               |                 |             |                  |             |

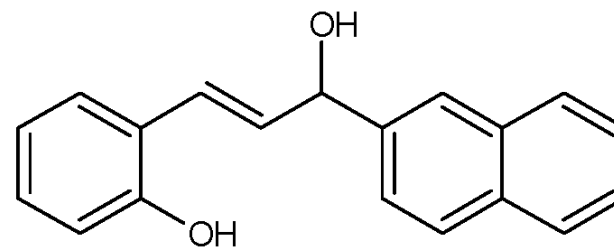

10b-1H.esp

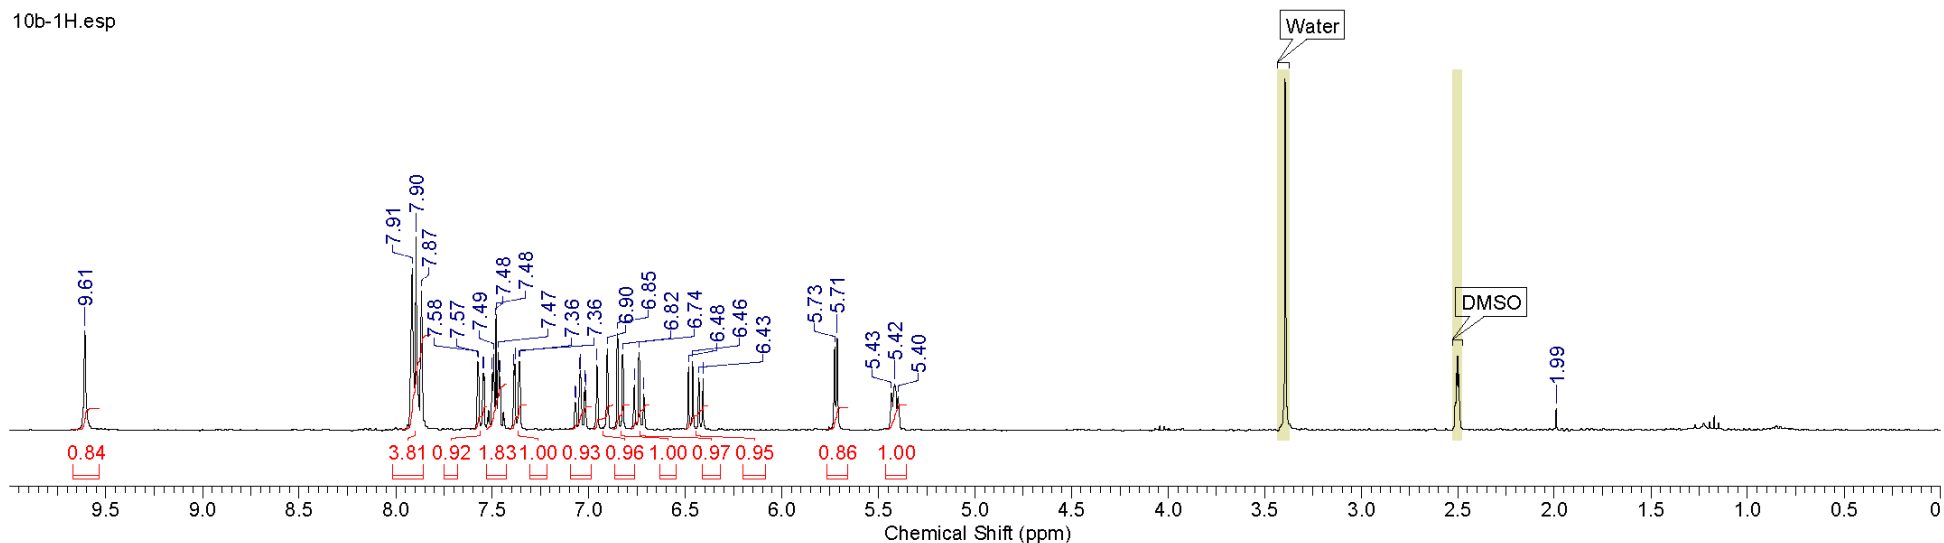

| No. | (ppm)          | Annotation | Layer No. | Created By | Created At                 | Modified By | Modified At |
|-----|----------------|------------|-----------|------------|----------------------------|-------------|-------------|
| 1   | [2.48 .. 2.53] | DMSO       | 1         | User       | Sun 2012/03/11 11:49:29 AM |             |             |
| 2   | [3.37 .. 3.43] | Water      | 1         | User       | Sun 2012/03/11 11:49:29 AM |             |             |

Formula C<sub>19</sub>H<sub>16</sub>O<sub>2</sub> FW 276.3291

|                        |             |                |                                                           |                      |          |                        |                     |
|------------------------|-------------|----------------|-----------------------------------------------------------|----------------------|----------|------------------------|---------------------|
| Acquisition Time (sec) | 1.8150      | Comment        | CC109-13C-DMSO                                            |                      | Date     | Feb 28 2011            |                     |
| Date Stamp             | Feb 28 2011 | File Name      | C:\Users\User\Desktop\adam\CCclean\CC109-13C-DMSO.fid\fid |                      |          |                        |                     |
| Frequency (MHz)        | 75.46       | Nucleus        | 13C                                                       | Number of Transients | 1464     | Original Points Count  | 34053               |
| Points Count           | 65536       | Pulse Sequence | s2pul                                                     | Receiver Gain        | 29.00    | Solvent                | DMSO-d6             |
| Spectrum Offset (Hz)   | 7510.5420   | Spectrum Type  | STANDARD                                                  | Sweep Width (Hz)     | 18761.73 | Temperature (degree C) | AMBIENT TEMPERATURE |



10b-13C.esp

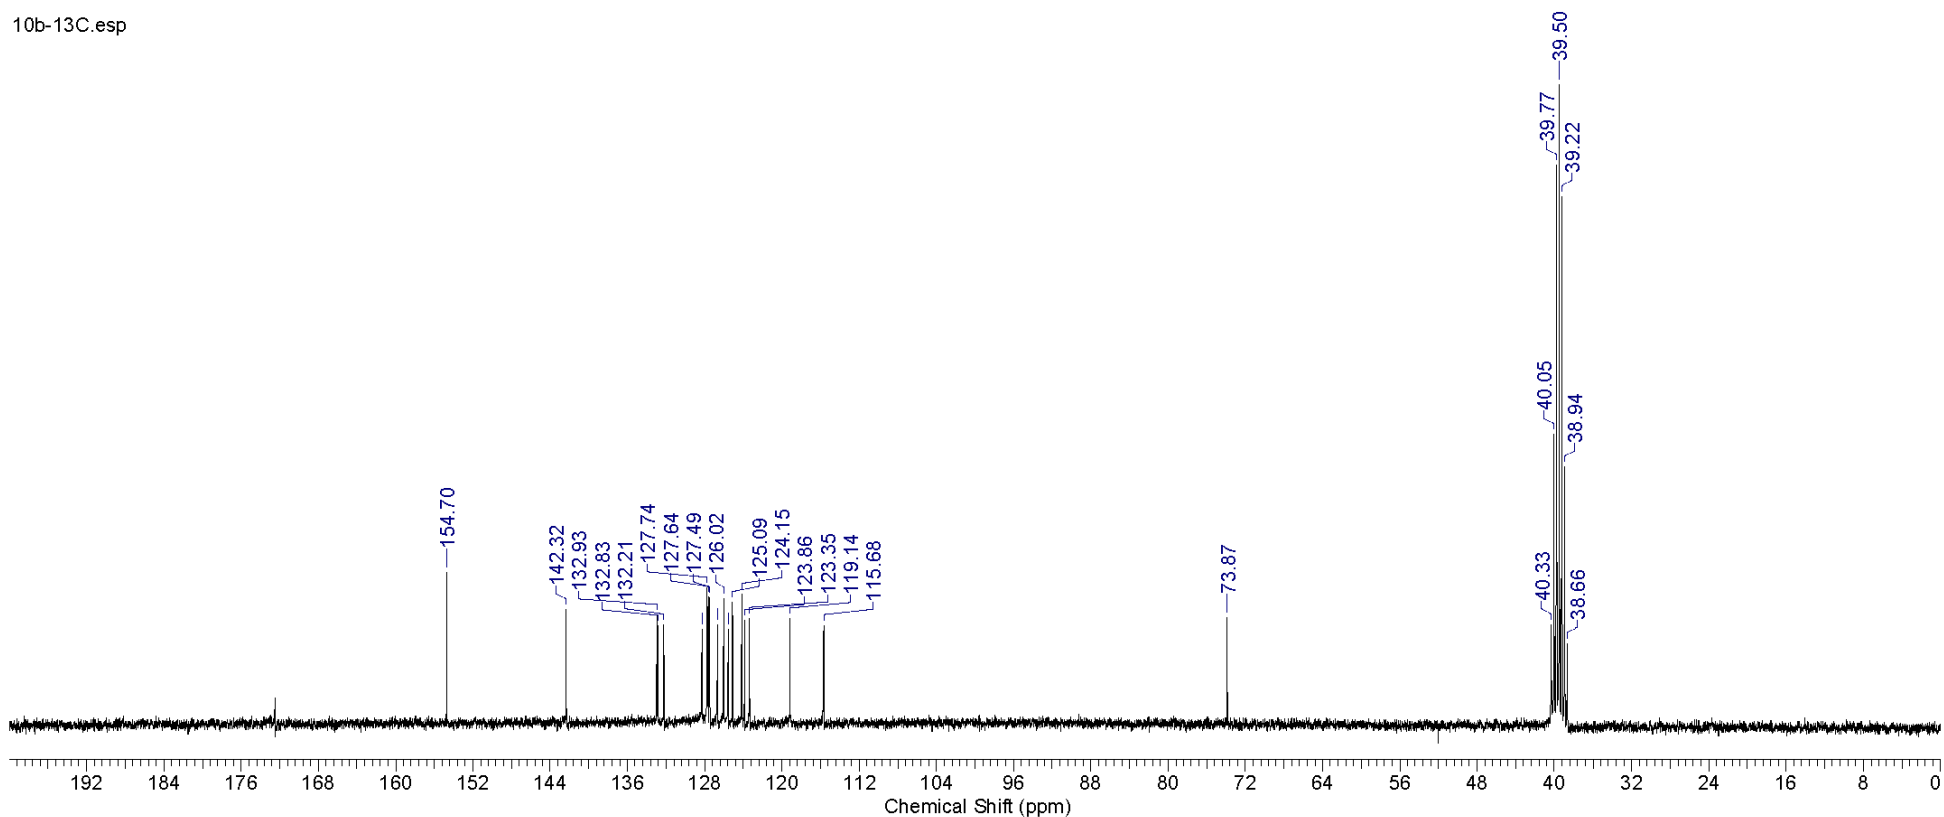

|         |                                                 |    |          |
|---------|-------------------------------------------------|----|----------|
| Formula | C <sub>16</sub> H <sub>13</sub> NO <sub>4</sub> | FW | 271.2680 |
|---------|-------------------------------------------------|----|----------|

|                        |                                                                   |                       |           |                 |            |                  |            |
|------------------------|-------------------------------------------------------------------|-----------------------|-----------|-----------------|------------|------------------|------------|
| Acquisition Time (sec) | 2.0000                                                            | Comment               | CC107-1H  | Date            | Mar 8 2011 | Date Stamp       | Mar 8 2011 |
| File Name              | C:\Users\User\Documents\PhD\PhD NMR data\CCclean\CC107-1H.fid\fid |                       |           | Frequency (MHz) | 300.08     | Nucleus          | 1H         |
| Number of Transients   | 4                                                                 | Original Points Count | 9600      | Points Count    | 131072     | Pulse Sequence   | s2pul      |
| Solvent                | DMSO-d6                                                           | Spectrum Offset (Hz)  | 1505.0852 | Spectrum Type   | STANDARD   | Sweep Width (Hz) | 4800.00    |
| Temperature (degree C) | AMBIENT TEMPERATURE                                               |                       |           |                 |            |                  |            |

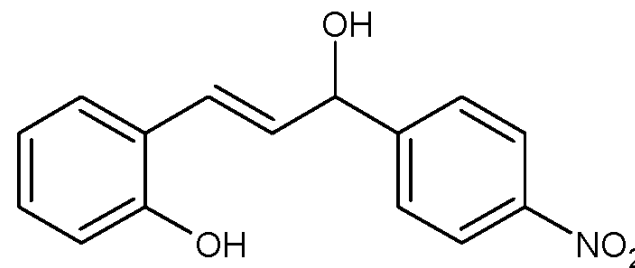

10c-1H.esp

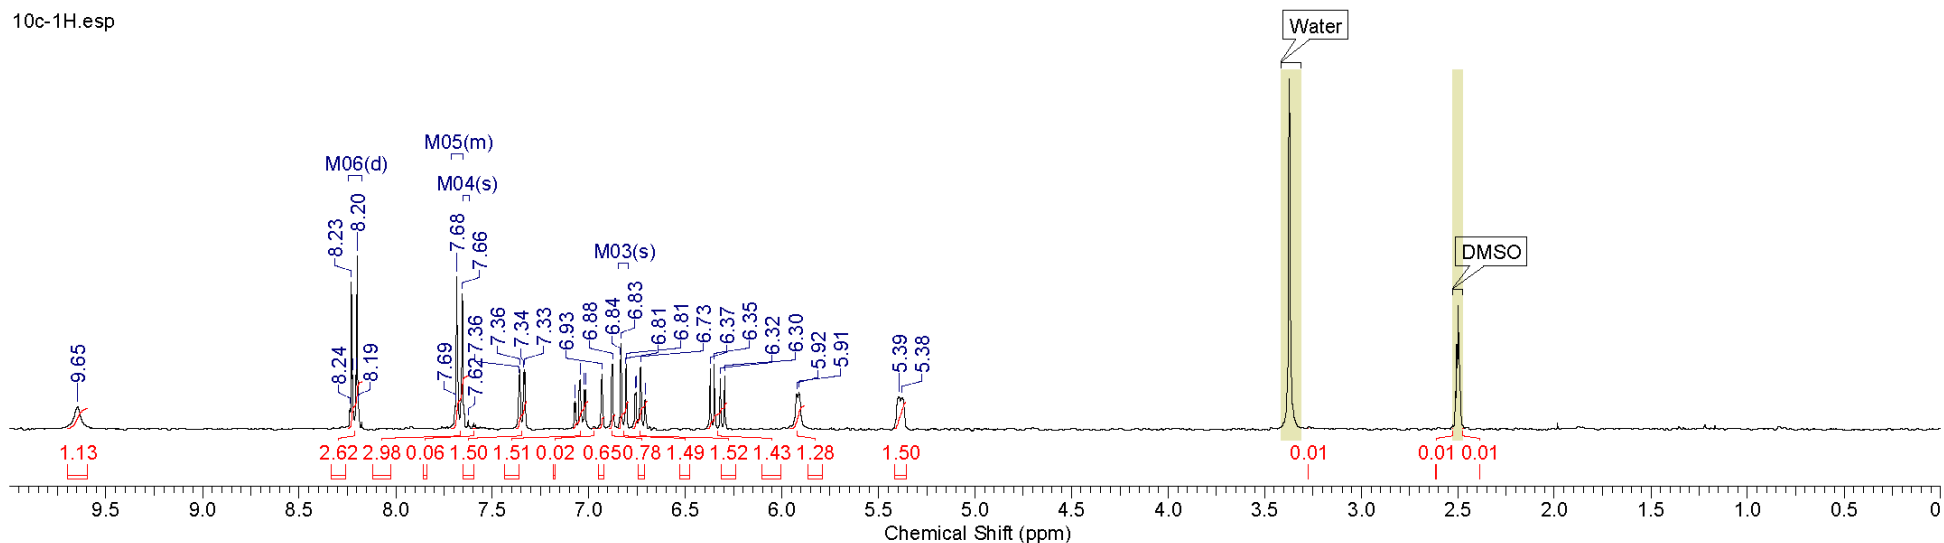

| No. | (ppm)          | Annotation | Layer No. | Created By | Created At                 | Modified By | Modified At |
|-----|----------------|------------|-----------|------------|----------------------------|-------------|-------------|
| 1   | [2.48 .. 2.52] | DMSO       | 1         | User       | Thu 2017/02/09 08:37:14 PM |             |             |
| 2   | [3.31 .. 3.42] | Water      | 1         | User       | Thu 2017/02/09 08:37:14 PM |             |             |



Formula C<sub>16</sub>H<sub>13</sub>NO<sub>4</sub> FW 271.2680

|                        |                                                                    |                      |           |                        |                     |                      |            |
|------------------------|--------------------------------------------------------------------|----------------------|-----------|------------------------|---------------------|----------------------|------------|
| Acquisition Time (sec) | 1.8150                                                             | Comment              | CC107-13C | Date                   | Mar 8 2011          | Date Stamp           | Mar 8 2011 |
| File Name              | C:\Users\User\Documents\PhD\PhD NMR data\CCclean\CC107-13C.fid\fid |                      |           |                        | Frequency (MHz)     | 75.46                |            |
| Nucleus                | 13C                                                                | Number of Transients | 356       | Original Points Count  | 34053               | Points Count         | 65536      |
| Pulse Sequence         | s2pul                                                              | Receiver Gain        | 33.00     | Solvent                | DMSO-d6             | Spectrum Offset (Hz) | 7511.8789  |
| Spectrum Type          | STANDARD                                                           | Sweep Width (Hz)     | 18761.73  | Temperature (degree C) | AMBIENT TEMPERATURE |                      |            |

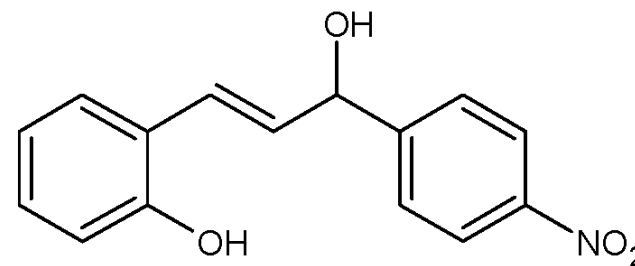

10c-13C.esp

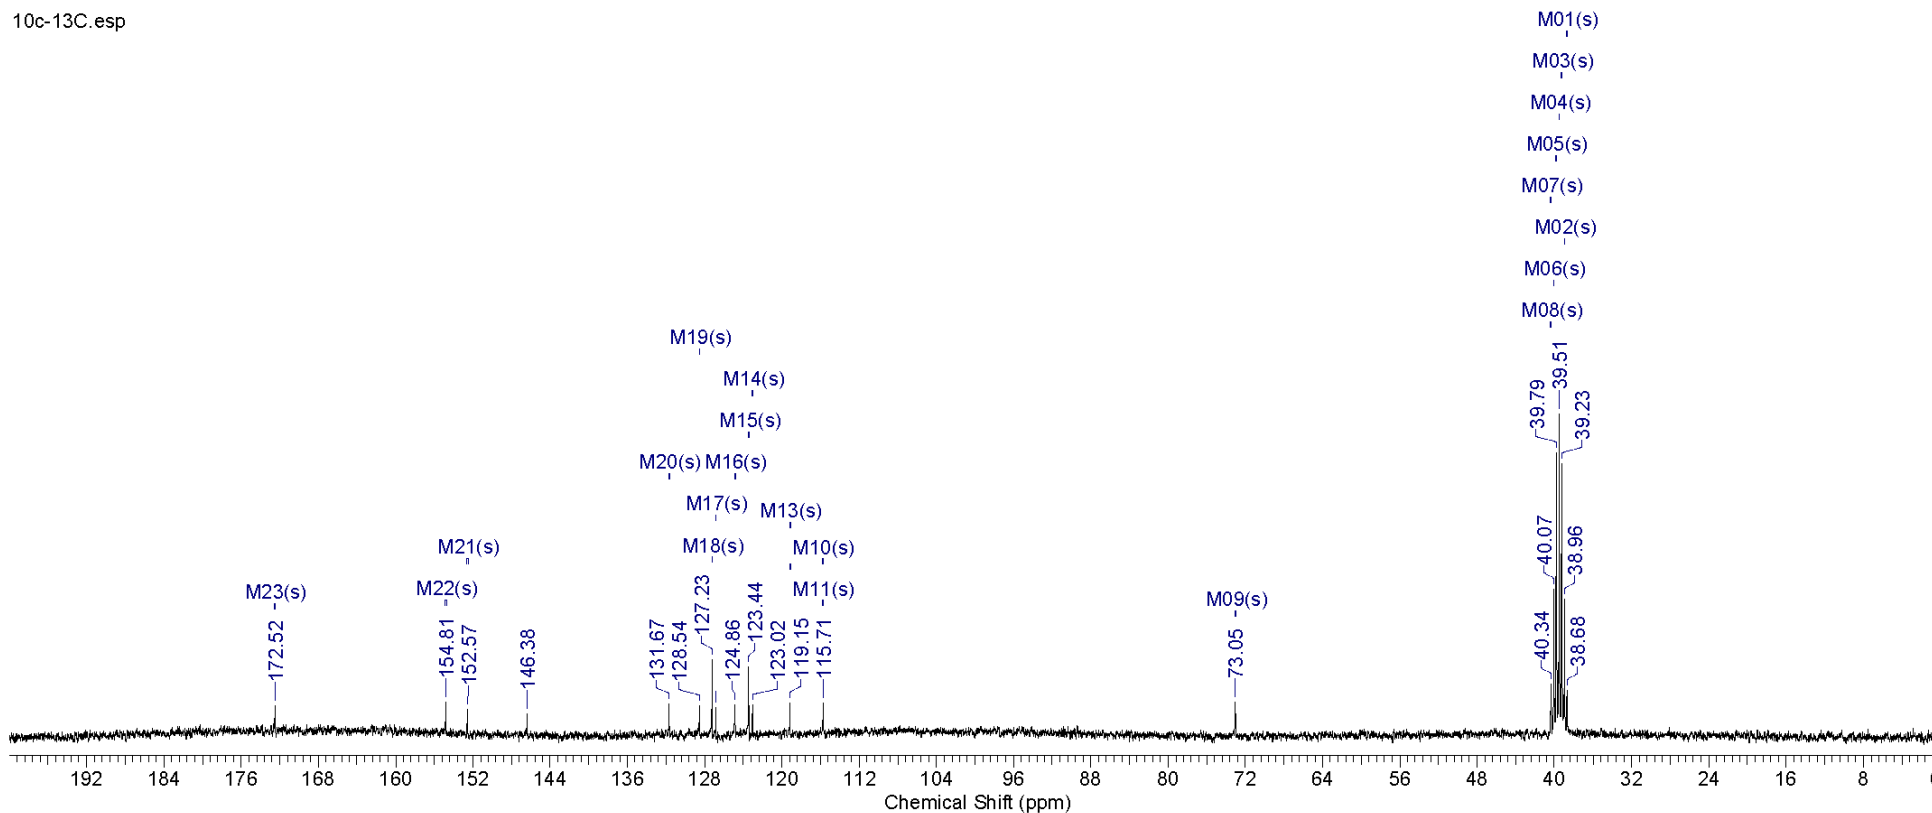

Formula C<sub>16</sub>H<sub>12</sub>O FW 208.2552

|                        |                                            |                       |          |                        |                      |                      |                      |
|------------------------|--------------------------------------------|-----------------------|----------|------------------------|----------------------|----------------------|----------------------|
| Acquisition Time (sec) | 3.9846                                     | Comment               | CC97d-1H | Date                   | 14 Sep 2010 08:49:36 | Date Stamp           | 14 Sep 2010 08:49:36 |
| File Name              | C:\Users\User\Desktop\adam\nmr\CC97d\1\fid | Frequency (MHz)       | 400.17   | Nucleus                | 1H                   | Number of Transients | 16                   |
| Origin                 | spect                                      | Original Points Count | 32768    | Owner                  | nmsu                 | Points Count         | 32768                |
| Receiver Gain          | 80.60                                      | SW(cyclical) (Hz)     | 8223.68  | Solvent                | CHLOROFORM-d         | Spectrum Offset (Hz) | 2454.8315            |
| Spectrum Type          | STANDARD                                   | Sweep Width (Hz)      | 8223.43  | Temperature (degree C) | 20.500               |                      |                      |

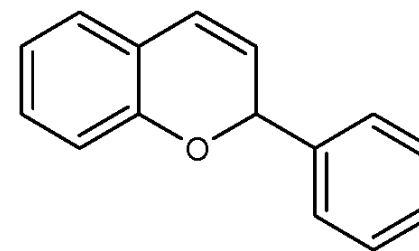

11a-1H.esp

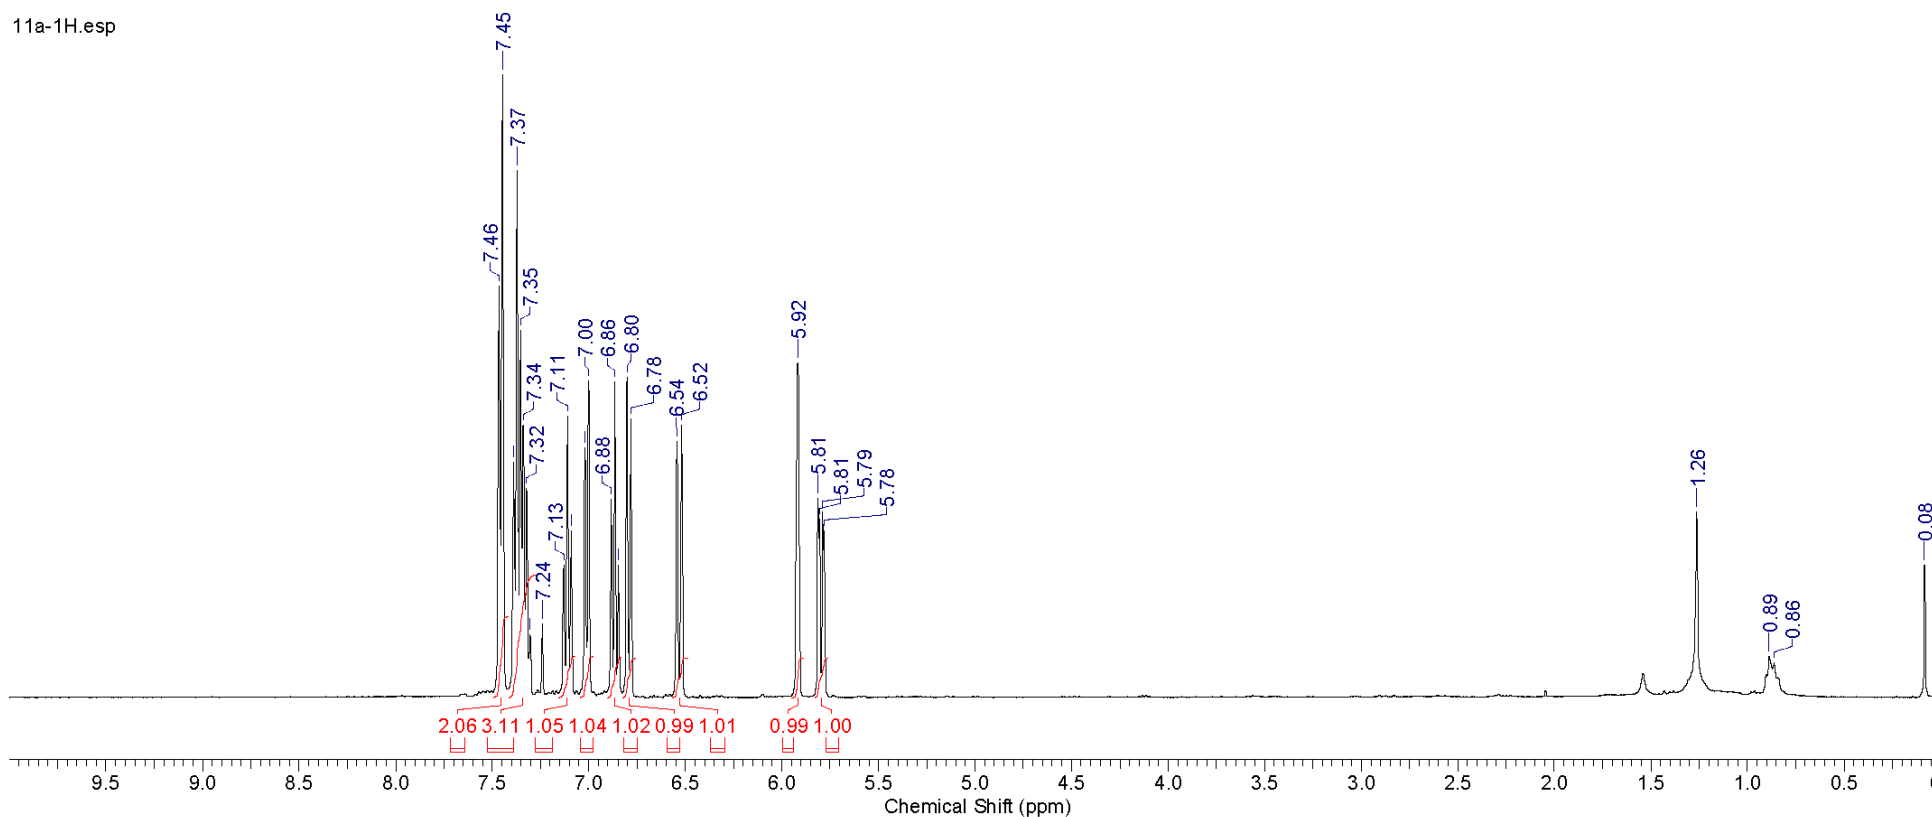

Formula C<sub>16</sub>H<sub>12</sub>O FW 208.2552

|                        |                                            |                       |           |                        |                      |                      |                      |
|------------------------|--------------------------------------------|-----------------------|-----------|------------------------|----------------------|----------------------|----------------------|
| Acquisition Time (sec) | 1.3631                                     | Comment               | CC97d-13C | Date                   | 14 Sep 2010 09:13:04 | Date Stamp           | 14 Sep 2010 09:13:04 |
| File Name              | C:\Users\User\Desktop\adam\nmr\CC97d\2\fid | Frequency (MHz)       | 100.62    | Nucleus                | 13C                  | Number of Transients | 384                  |
| Origin                 | spect                                      | Original Points Count | 32768     | Owner                  | nmrsu                | Points Count         | 32768                |
| Receiver Gain          | 114.00                                     | SW(cyclical) (Hz)     | 24038.46  | Solvent                | CHLOROFORM-d         | Pulse Sequence       | zqiq30               |
| Spectrum Type          | STANDARD                                   | Sweep Width (Hz)      | 24037.73  | Temperature (degree C) | 21.000               | Spectrum Offset (Hz) | 10054.7500           |

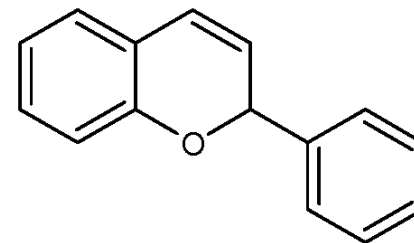

11a-13C.esp

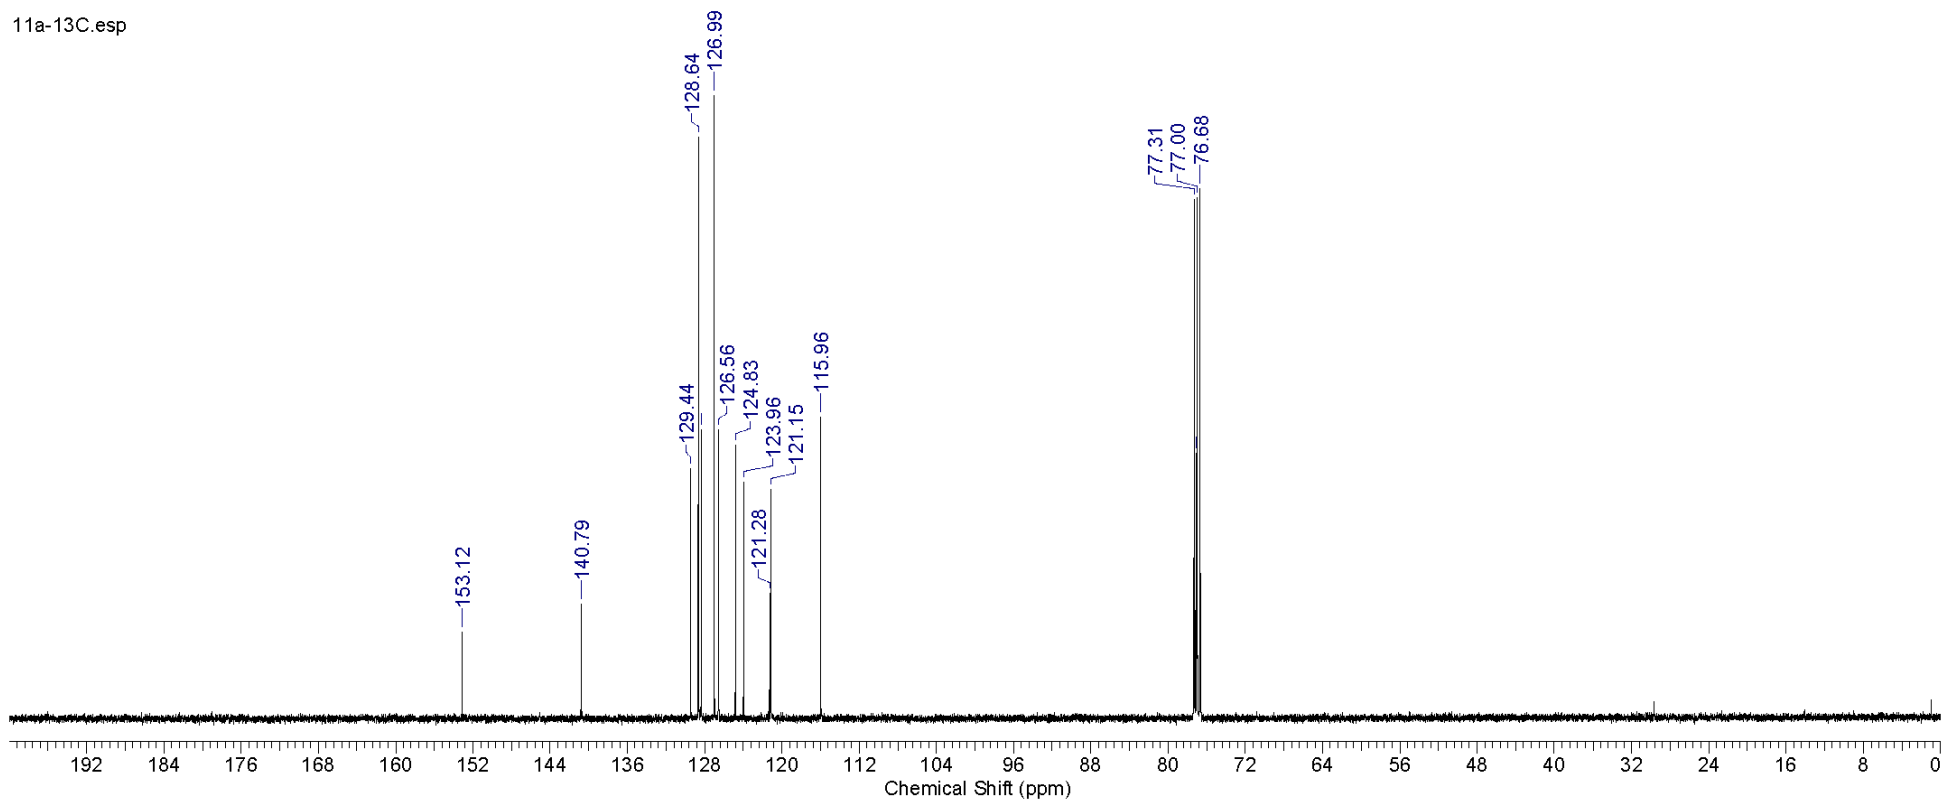

Formula C<sub>19</sub>H<sub>14</sub>O FW 258.3139

|                        |                                                     |               |                 |                  |            |                        |                      |         |              |
|------------------------|-----------------------------------------------------|---------------|-----------------|------------------|------------|------------------------|----------------------|---------|--------------|
| Acquisition Time (sec) | 2.0000                                              | Comment       | CC110-1H        | Date             | Mar 2 2011 | Date Stamp             | Mar 2 2011           |         |              |
| File Name              | C:\Users\User\Desktop\adam\CCclean\CC110-1H.fid\fid |               | Frequency (MHz) | 300.08           | Nucleus    | 1H                     | Number of Transients | 6       |              |
| Original Points Count  | 9600                                                | Points Count  | 16384           | Pulse Sequence   | s2pul      | Receiver Gain          | 2.00                 | Solvent | CHLOROFORM-d |
| Spectrum Offset (Hz)   | 1495.0524                                           | Spectrum Type | STANDARD        | Sweep Width (Hz) | 4800.00    | Temperature (degree C) | AMBIENT TEMPERATURE  |         |              |

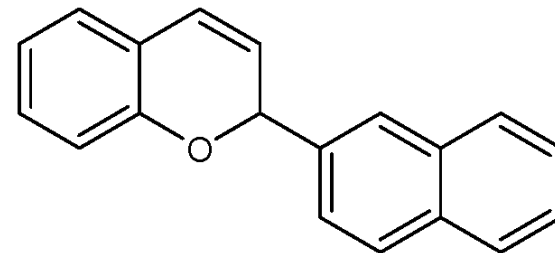

11b-1H.esp

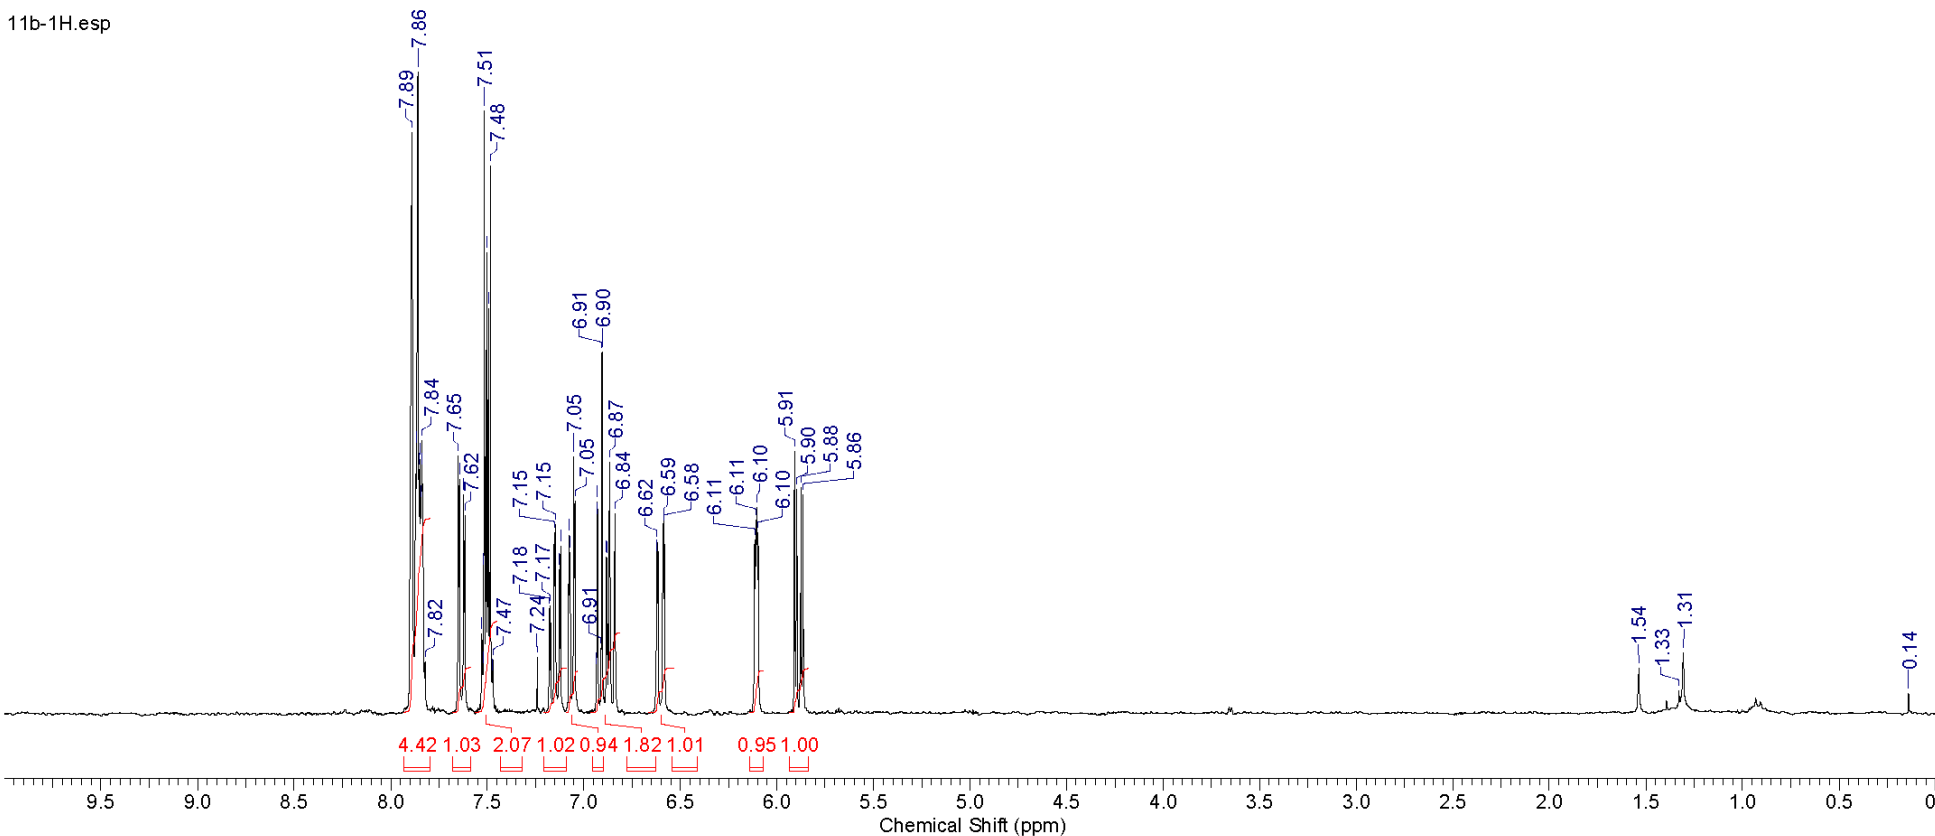

Formula C<sub>19</sub>H<sub>14</sub>O FW 258.3139

|                        |                                                      |              |           |                      |            |               |            |                      |          |
|------------------------|------------------------------------------------------|--------------|-----------|----------------------|------------|---------------|------------|----------------------|----------|
| Acquisition Time (sec) | 1.8150                                               | Comment      | CC110-13C | Date                 | Mar 2 2011 | Date Stamp    | Mar 2 2011 |                      |          |
| File Name              | C:\Users\User\Desktop\adam\CCclean\CC110-13C.fid\fid |              |           | Frequency (MHz)      | 75.46      | Nucleus       | 13C        | Number of Transients | 1344     |
| Original Points Count  | 34053                                                | Points Count | 65536     | Pulse Sequence       | s2pul      | Receiver Gain | 30.00      |                      |          |
| Solvent                | CHLOROFORM-d                                         |              |           | Spectrum Offset (Hz) | 7538.5112  | Spectrum Type | STANDARD   | Sweep Width (Hz)     | 18761.73 |
| Temperature (degree C) | AMBIENT TEMPERATURE                                  |              |           |                      |            |               |            |                      |          |

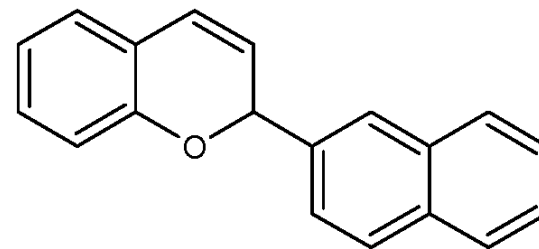

11b-13C.esp

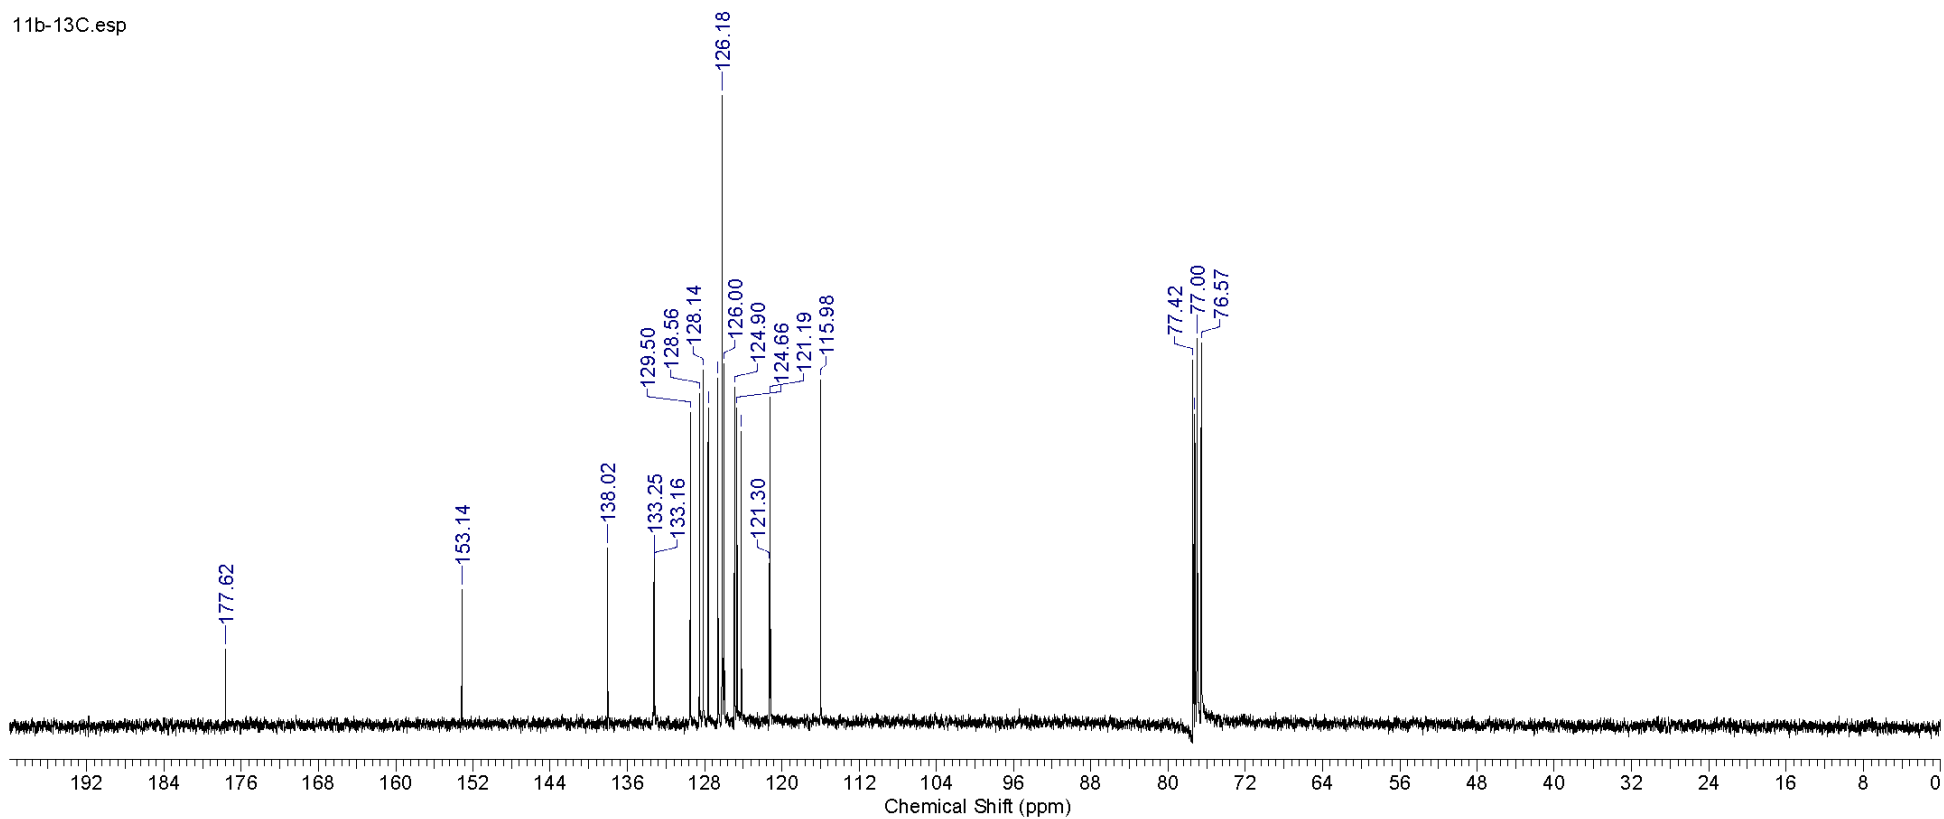

|                |                                                 |           |          |
|----------------|-------------------------------------------------|-----------|----------|
| <b>Formula</b> | C <sub>15</sub> H <sub>11</sub> NO <sub>3</sub> | <b>FW</b> | 253.2527 |
|----------------|-------------------------------------------------|-----------|----------|

|                               |                                                                   |                             |          |                              |                        |                                                   |            |
|-------------------------------|-------------------------------------------------------------------|-----------------------------|----------|------------------------------|------------------------|---------------------------------------------------|------------|
| <b>Acquisition Time (sec)</b> | 2.0000                                                            | <b>Comment</b>              | CC108-1H | <b>Date</b>                  | Mar 9 2011             | <b>Date Stamp</b>                                 | Mar 9 2011 |
| <b>File Name</b>              | C:\Users\User\Documents\PhD\PhD NMR data\CCclean\CC108-1H.fid\fid |                             |          |                              | <b>Frequency (MHz)</b> | 300.08                                            |            |
| <b>Nucleus</b>                | 1H                                                                | <b>Number of Transients</b> | 4        | <b>Original Points Count</b> | 9600                   | <b>Points Count</b>                               | 131072     |
| <b>Pulse Sequence</b>         | s2pul                                                             | <b>Receiver Gain</b>        | 20.00    | <b>Solvent</b>               | CHLOROFORM-d           |                                                   |            |
| <b>Spectrum Offset (Hz)</b>   | 1495.0524                                                         | <b>Spectrum Type</b>        | STANDARD | <b>Sweep Width (Hz)</b>      | 4800.00                | <b>Temperature (degree C)</b> AMBIENT TEMPERATURE |            |

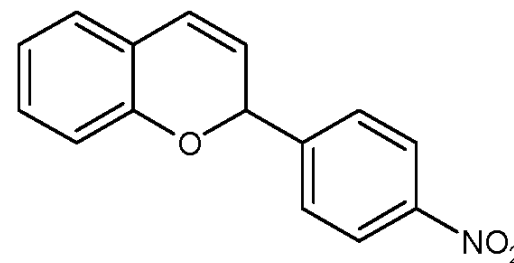

11c-1H.esp

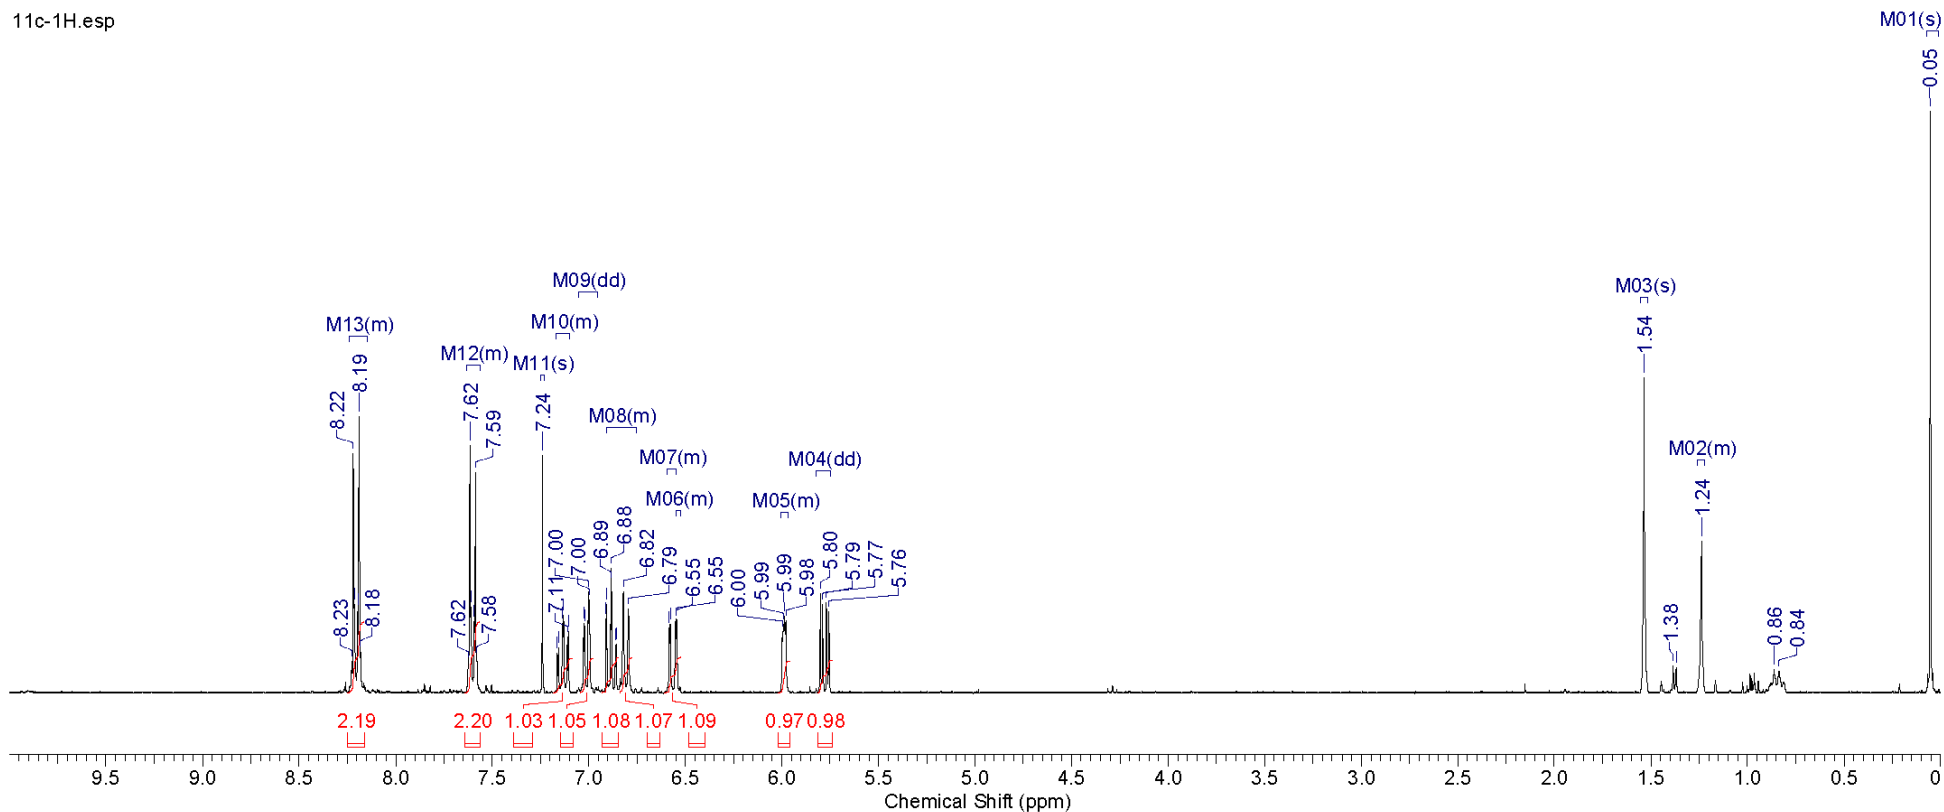

Formula  $C_{16}H_{11}NO_3$  FW 253.2527

|                        |                                                                    |                      |           |                       |                 |                        |                     |
|------------------------|--------------------------------------------------------------------|----------------------|-----------|-----------------------|-----------------|------------------------|---------------------|
| Acquisition Time (sec) | 1.8150                                                             | Comment              | CC108-13C | Date                  | Mar 9 2011      | Date Stamp             | Mar 9 2011          |
| File Name              | C:\Users\User\Documents\PhD\PhD NMR data\CCclean\CC108-13C.fid\fid |                      |           |                       | Frequency (MHz) | 75.46                  |                     |
| Nucleus                | 13C                                                                | Number of Transients | 20688     | Original Points Count | 34053           | Points Count           | 65536               |
| Pulse Sequence         | s2pul                                                              | Receiver Gain        | 30.00     | Solvent               | CHLOROFORM-d    |                        |                     |
| Spectrum Offset (Hz)   | 7545.6675                                                          | Spectrum Type        | STANDARD  | Sweep Width (Hz)      | 18761.73        | Temperature (degree C) | AMBIENT TEMPERATURE |



11c-13C.esp

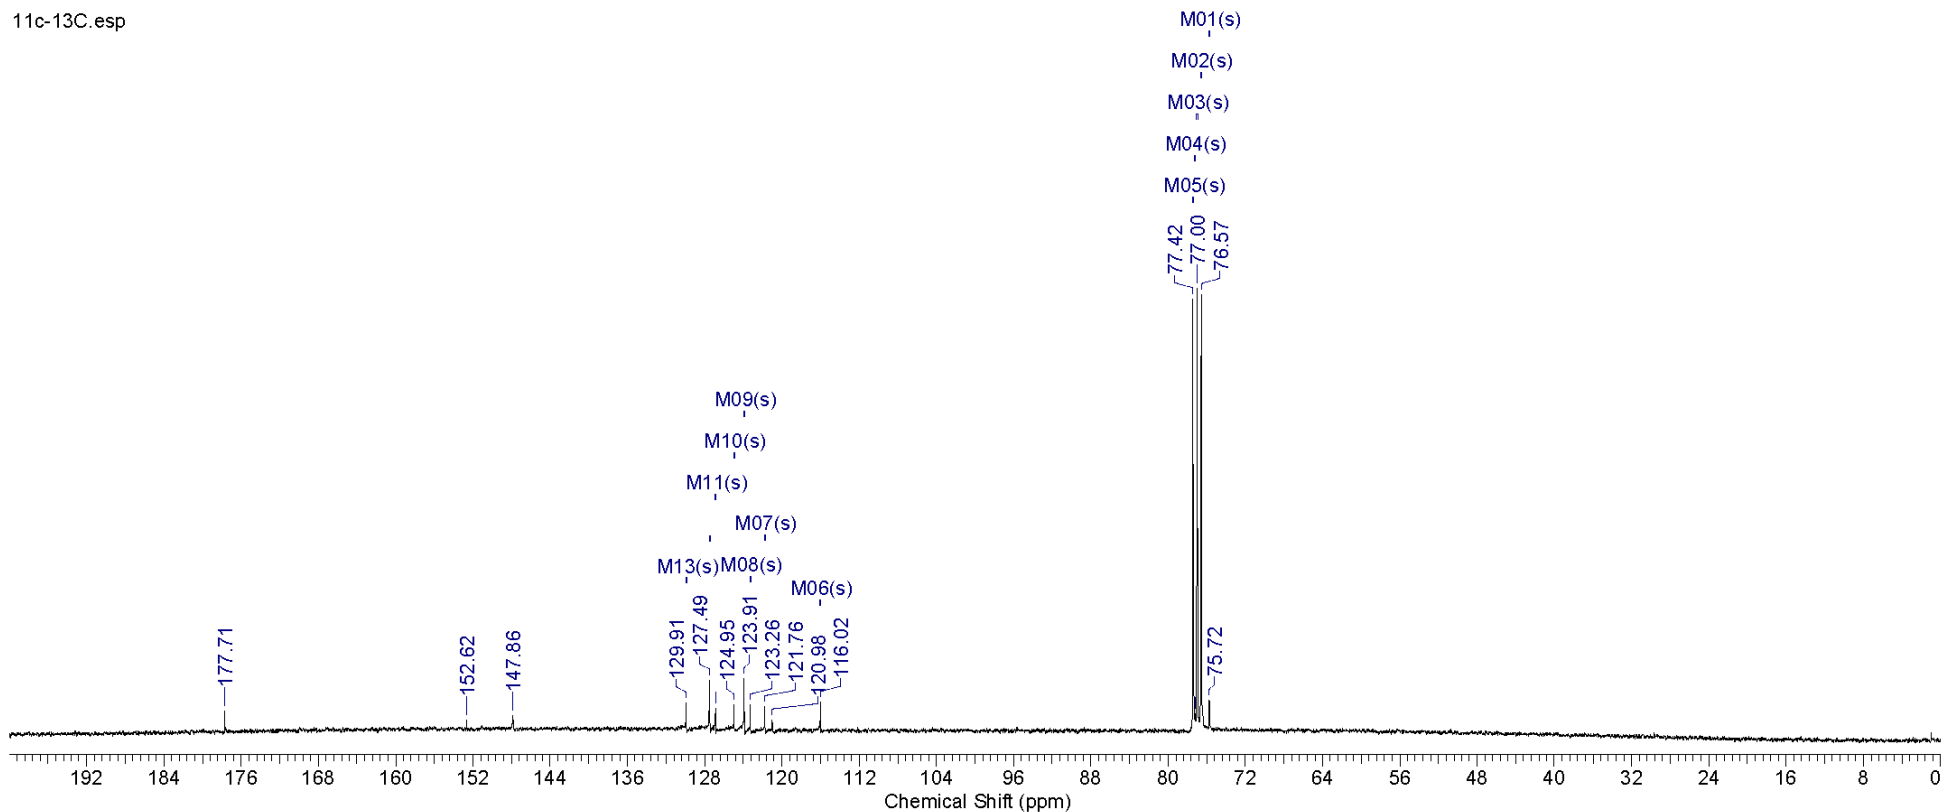

Formula C<sub>16</sub>H<sub>14</sub>O<sub>2</sub> FW 226.2705

|                        |                                                     |                 |          |                  |             |                        |                     |
|------------------------|-----------------------------------------------------|-----------------|----------|------------------|-------------|------------------------|---------------------|
| Acquisition Time (sec) | 2.0000                                              | Comment         | CC178-1H | Date             | Sep 20 2011 | Date Stamp             | Sep 20 2011         |
| File Name              | C:\Users\User\Desktop\adam\CCclean\CC178-1H.fid\fid | Frequency (MHz) | 300.08   | Nucleus          | 1H          | Number of Transients   | 4                   |
| Original Points Count  | 9600                                                | Points Count    | 16384    | Pulse Sequence   | s2pul       | Receiver Gain          | 13.00               |
| Spectrum Offset (Hz)   | 1505.9641                                           | Spectrum Type   | STANDARD | Sweep Width (Hz) | 4800.00     | Temperature (degree C) | AMBIENT TEMPERATURE |

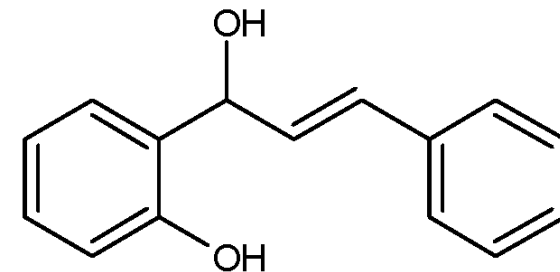

12-1H.esp

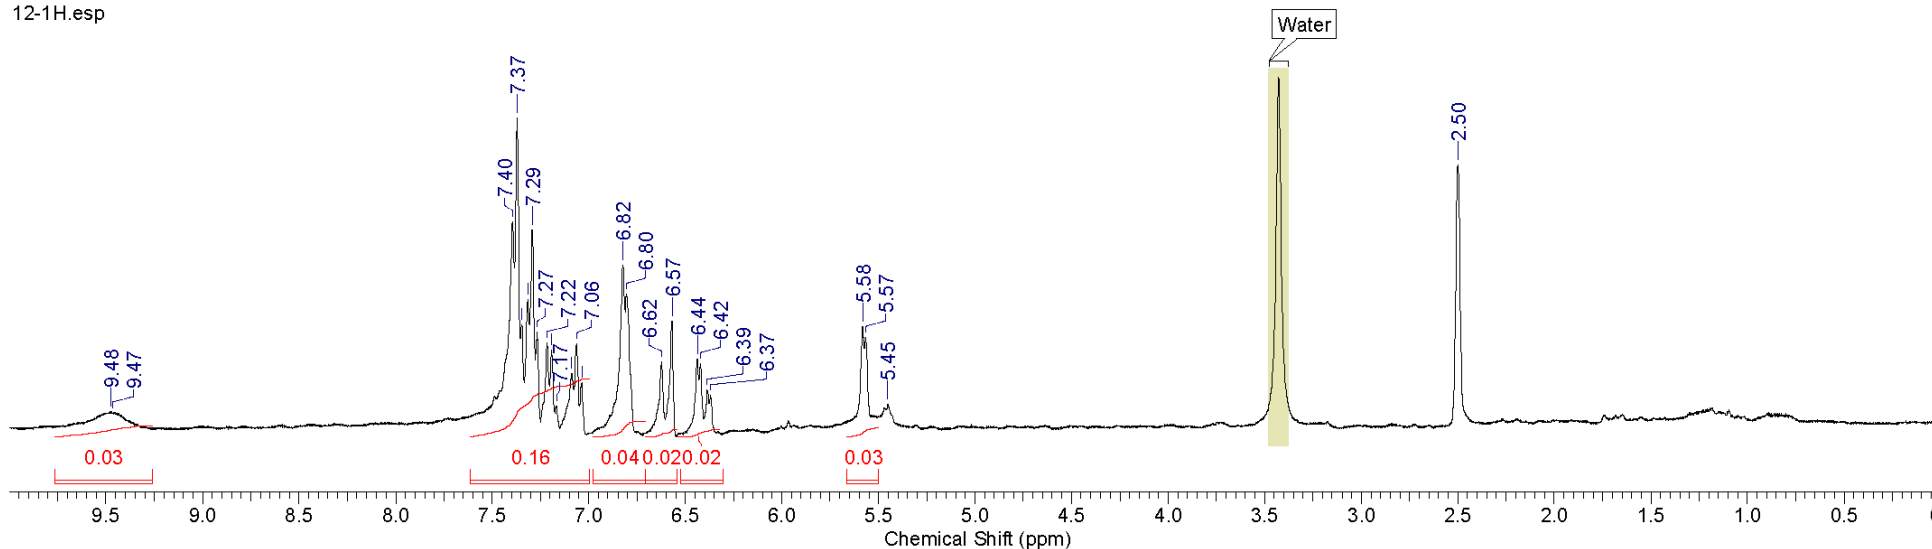

| No. | (ppm)          | Annotation | Layer No. | Created By | Created At                 | Modified By | Modified At |
|-----|----------------|------------|-----------|------------|----------------------------|-------------|-------------|
| 1   | [3.38 .. 3.48] | Water      | 1         | User       | Sun 2012/03/11 12:17:09 PM |             |             |



Formula  $C_{15}H_{14}O_2$  FW 226.2705

|                        |                                                                   |                      |          |                        |                     |                      |             |
|------------------------|-------------------------------------------------------------------|----------------------|----------|------------------------|---------------------|----------------------|-------------|
| Acquisition Time (sec) | 2.0000                                                            | Comment              | CC178-1H | Date                   | Sep 20 2011         | Date Stamp           | Sep 20 2011 |
| File Name              | C:\Users\User\Documents\PhD\PhD NMR data\CCclean\CC178-1H.fid\fid |                      |          | Frequency (MHz)        | 300.08              |                      |             |
| Nucleus                | 1H                                                                | Number of Transients | 4        | Original Points Count  | 9600                | Points Count         | 131072      |
| Pulse Sequence         | s2pul                                                             | Receiver Gain        | 13.00    | Solvent                | DMSO-d6             | Spectrum Offset (Hz) | 1505.9641   |
| Spectrum Type          | STANDARD                                                          | Sweep Width (Hz)     | 4800.00  | Temperature (degree C) | AMBIENT TEMPERATURE |                      |             |

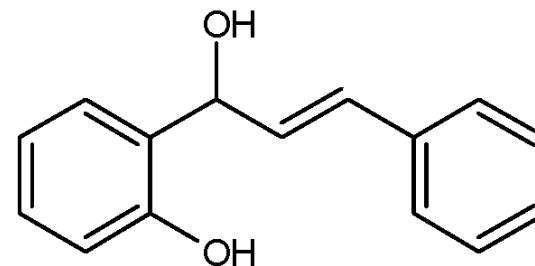

12-1H-2nd spectra. esp

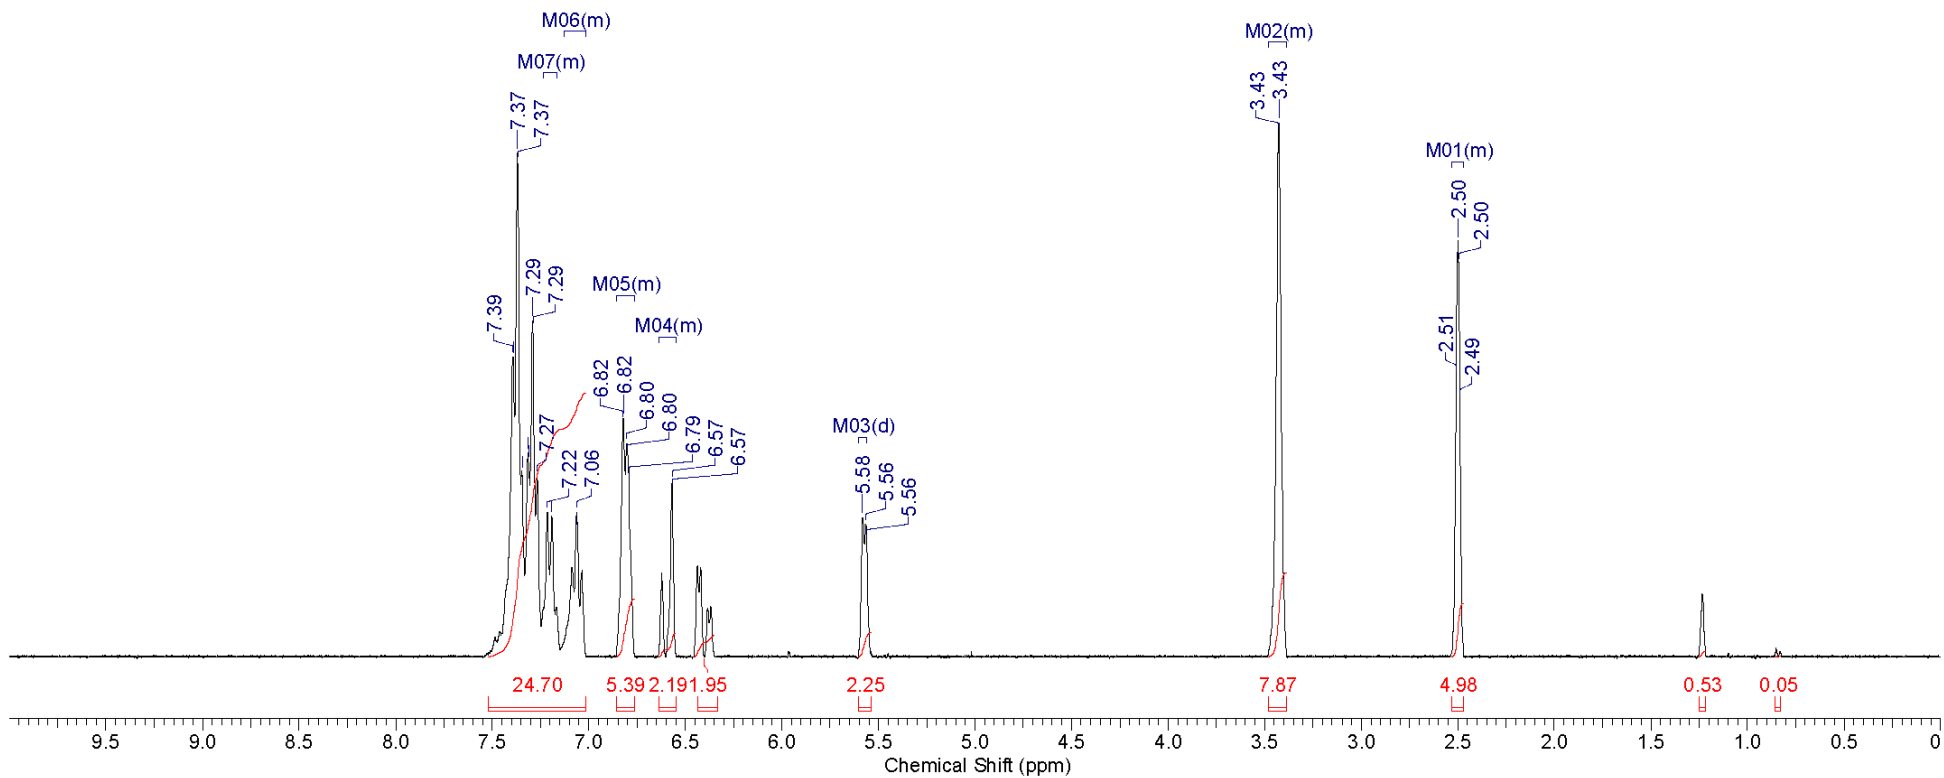

Formula C<sub>16</sub>H<sub>14</sub>O<sub>2</sub> FW 226.2705

|                        |                                                      |               |                 |                  |             |                        |                      |         |         |
|------------------------|------------------------------------------------------|---------------|-----------------|------------------|-------------|------------------------|----------------------|---------|---------|
| Acquisition Time (sec) | 1.8150                                               | Comment       | CC178-13C       | Date             | Sep 20 2011 | Date Stamp             | Sep 20 2011          |         |         |
| File Name              | C:\Users\User\Desktop\adam\CCclean\CC178-13C.fid\fid |               | Frequency (MHz) | 75.46            | Nucleus     | 13C                    | Number of Transients | 4268    |         |
| Original Points Count  | 34053                                                | Points Count  | 65536           | Pulse Sequence   | s2pul       | Receiver Gain          | 30.00                | Solvent | DMSO-d6 |
| Spectrum Offset (Hz)   | 7513.4043                                            | Spectrum Type | STANDARD        | Sweep Width (Hz) | 18761.73    | Temperature (degree C) | AMBIENT TEMPERATURE  |         |         |

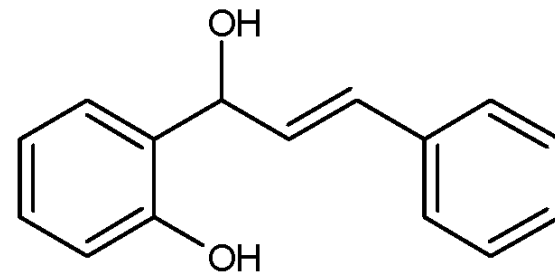

12-13C.esp

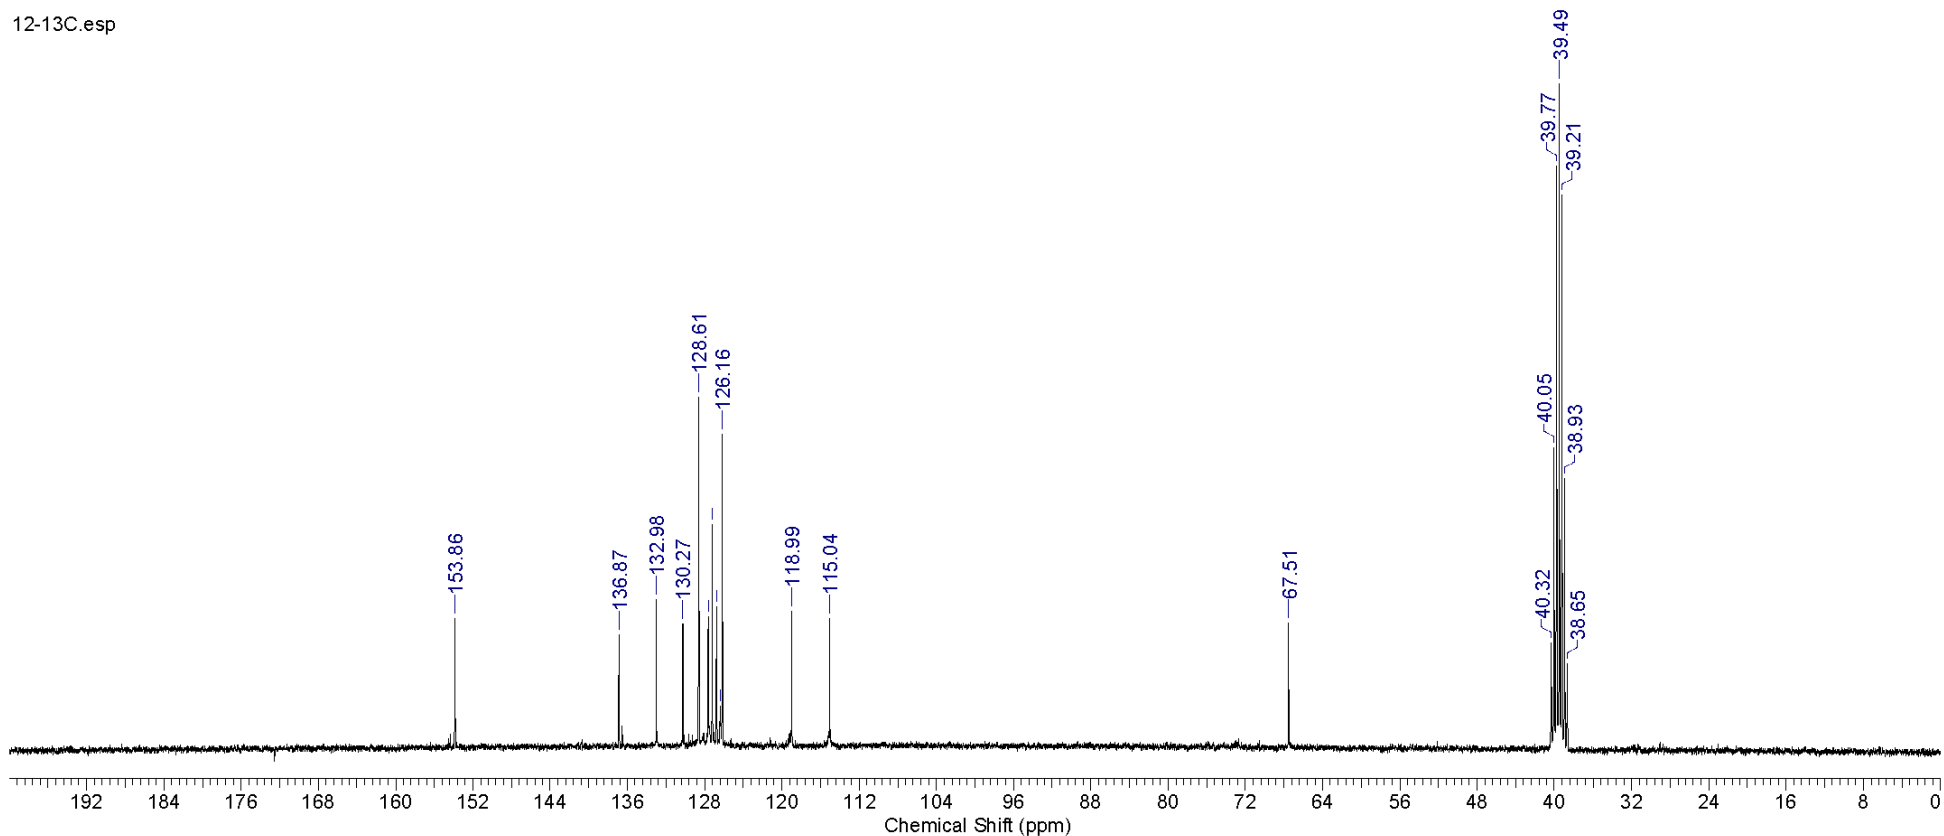

Formula C<sub>22</sub>H<sub>21</sub>NO<sub>3</sub> FW 379.4720

|                        |                                                     |                 |          |                  |             |                        |                     |
|------------------------|-----------------------------------------------------|-----------------|----------|------------------|-------------|------------------------|---------------------|
| Acquisition Time (sec) | 2.0000                                              | Comment         | CC133-1H | Date             | May 18 2011 | Date Stamp             | May 18 2011         |
| File Name              | C:\Users\User\Desktop\adam\CCclean\CC133-1H.fid\fid | Frequency (MHz) | 300.08   | Nucleus          | 1H          | Number of Transients   | 6                   |
| Original Points Count  | 9600                                                | Points Count    | 16384    | Pulse Sequence   | s2pul       | Receiver Gain          | 4.00                |
| Spectrum Offset (Hz)   | 1505.3820                                           | Spectrum Type   | STANDARD | Sweep Width (Hz) | 4800.00     | Temperature (degree C) | AMBIENT TEMPERATURE |

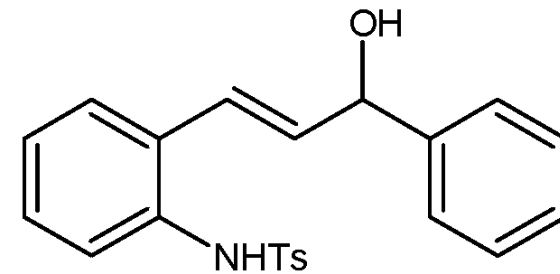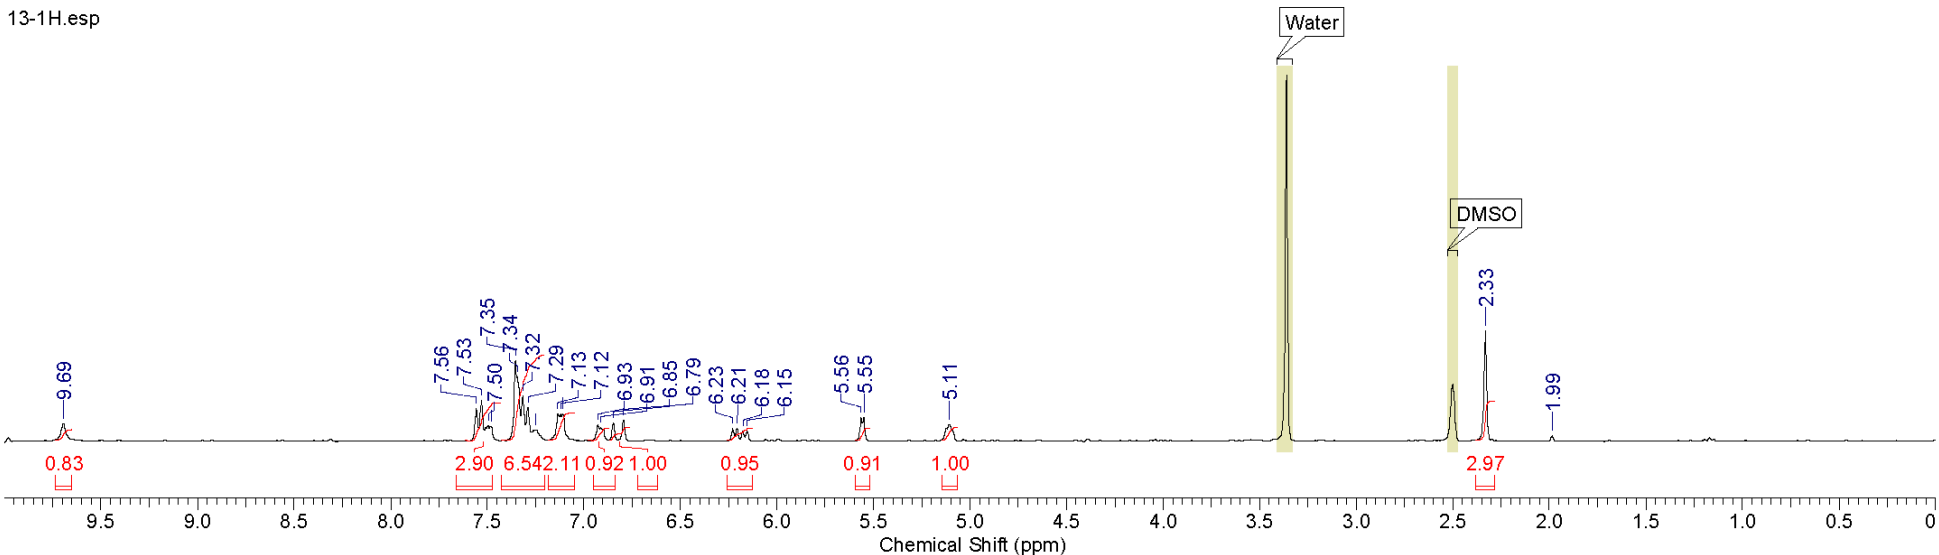

| No. | (ppm)          | Annotation | Layer No. | Created By | Created At                 | Modified By | Modified At |
|-----|----------------|------------|-----------|------------|----------------------------|-------------|-------------|
| 1   | [2.48 .. 2.52] | DMSO       | 1         | User       | Sun 2012/03/11 12:58:59 PM |             |             |
| 2   | [3.33 .. 3.41] | Water      | 1         | User       | Sun 2012/03/11 12:58:59 PM |             |             |

Formula C<sub>22</sub>H<sub>21</sub>NO<sub>3</sub> FW 379.4720

|                        |                                                      |               |           |                  |             |                        |                     |
|------------------------|------------------------------------------------------|---------------|-----------|------------------|-------------|------------------------|---------------------|
| Acquisition Time (sec) | 1.8150                                               | Comment       | CC133-13C | Date             | May 18 2011 | Date Stamp             | May 18 2011         |
| File Name              | C:\Users\User\Desktop\adam\CCclean\CC133-13C.fid\fid |               |           | Frequency (MHz)  | 75.46       | Nucleus                | 13C                 |
| Original Points Count  | 34053                                                | Points Count  | 65536     | Pulse Sequence   | s2pul       | Receiver Gain          | 29.00               |
| Spectrum Offset (Hz)   | 7512.2593                                            | Spectrum Type | STANDARD  | Sweep Width (Hz) | 18761.73    | Temperature (degree C) | AMBIENT TEMPERATURE |
|                        |                                                      |               |           |                  |             | Number of Transients   | 5000                |
|                        |                                                      |               |           |                  |             | Solvent                | DMSO-d6             |

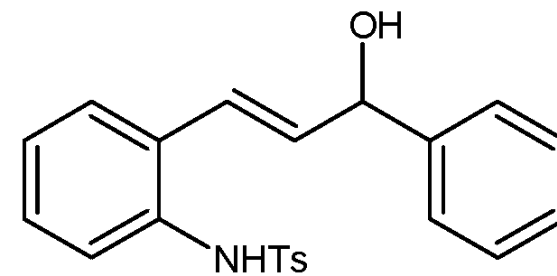

13-13C.esp

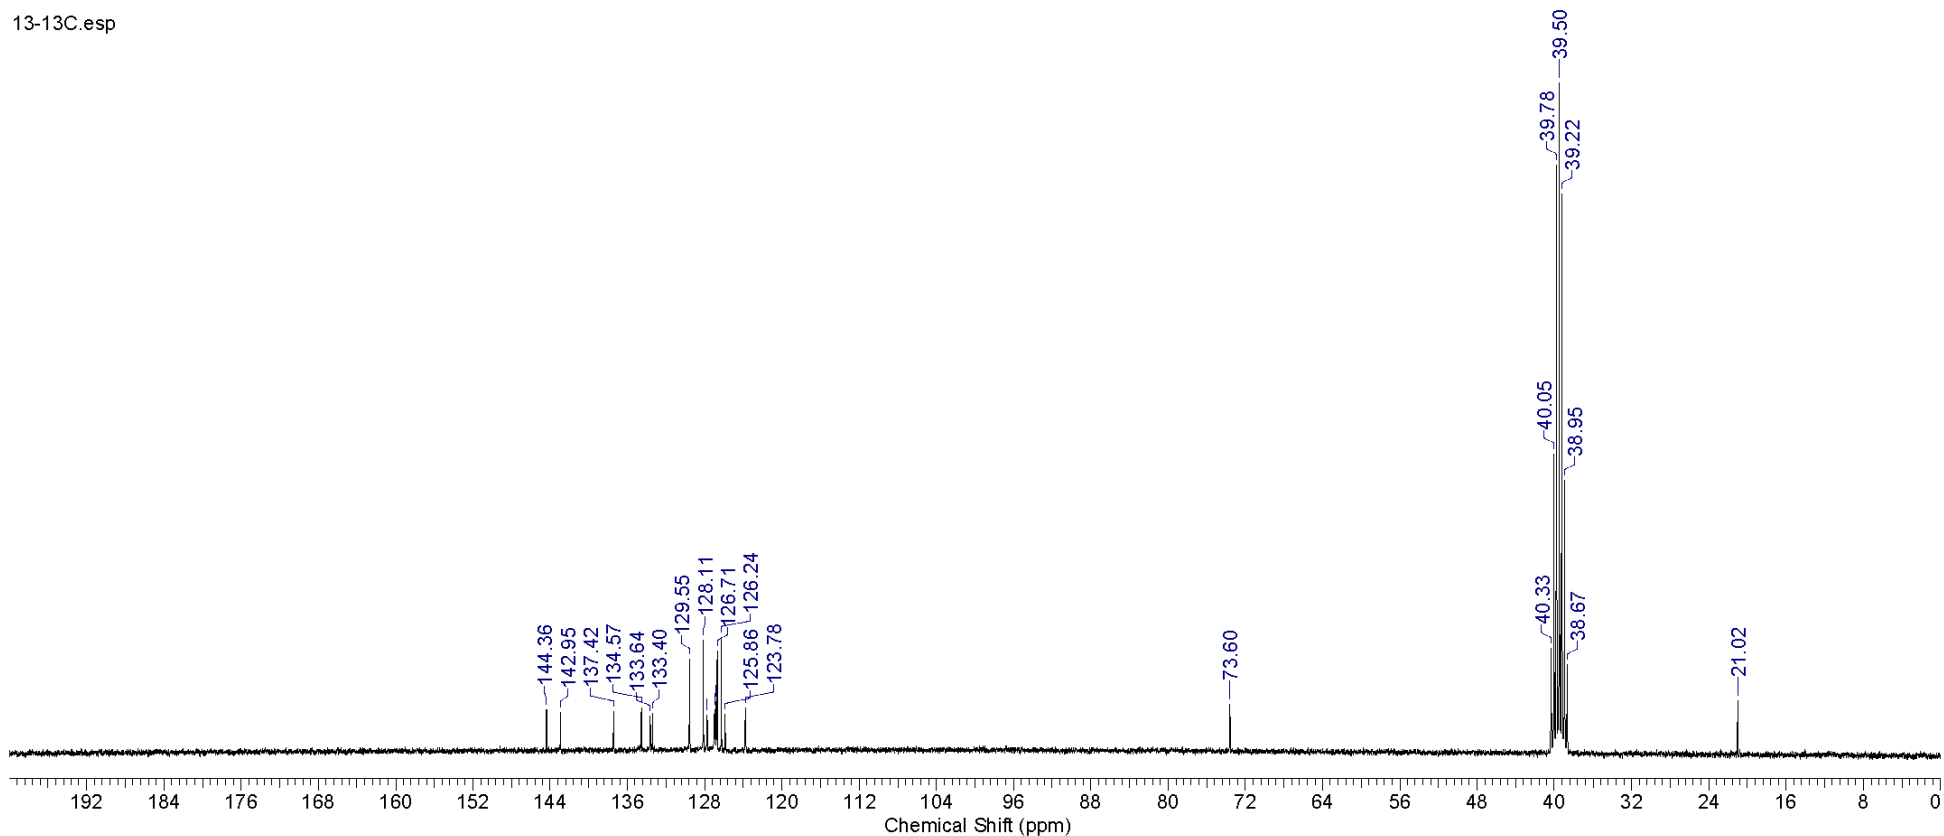

Formula C<sub>22</sub>H<sub>19</sub>NO S FW 361.4568

|                        |                                                     |               |          |                  |             |                        |                     |                      |              |
|------------------------|-----------------------------------------------------|---------------|----------|------------------|-------------|------------------------|---------------------|----------------------|--------------|
| Acquisition Time (sec) | 2.0000                                              | Comment       | CC138-1H | Date             | May 26 2011 | Date Stamp             | May 26 2011         |                      |              |
| File Name              | C:\Users\User\Desktop\adam\CCclean\CC138-1H.fid\fid |               |          | Frequency (MHz)  | 300.08      | Nucleus                | 1H                  | Number of Transients | 4            |
| Original Points Count  | 9600                                                | Points Count  | 16384    | Pulse Sequence   | s2pul       | Receiver Gain          | 11.00               | Solvent              | CHLOROFORM-d |
| Spectrum Offset (Hz)   | 1494.8170                                           | Spectrum Type | STANDARD | Sweep Width (Hz) | 4800.00     | Temperature (degree C) | AMBIENT TEMPERATURE |                      |              |

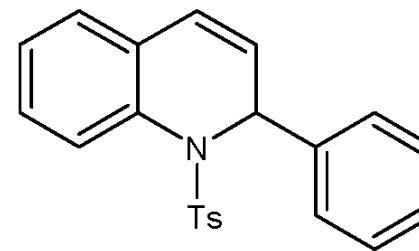

14-1H.esp

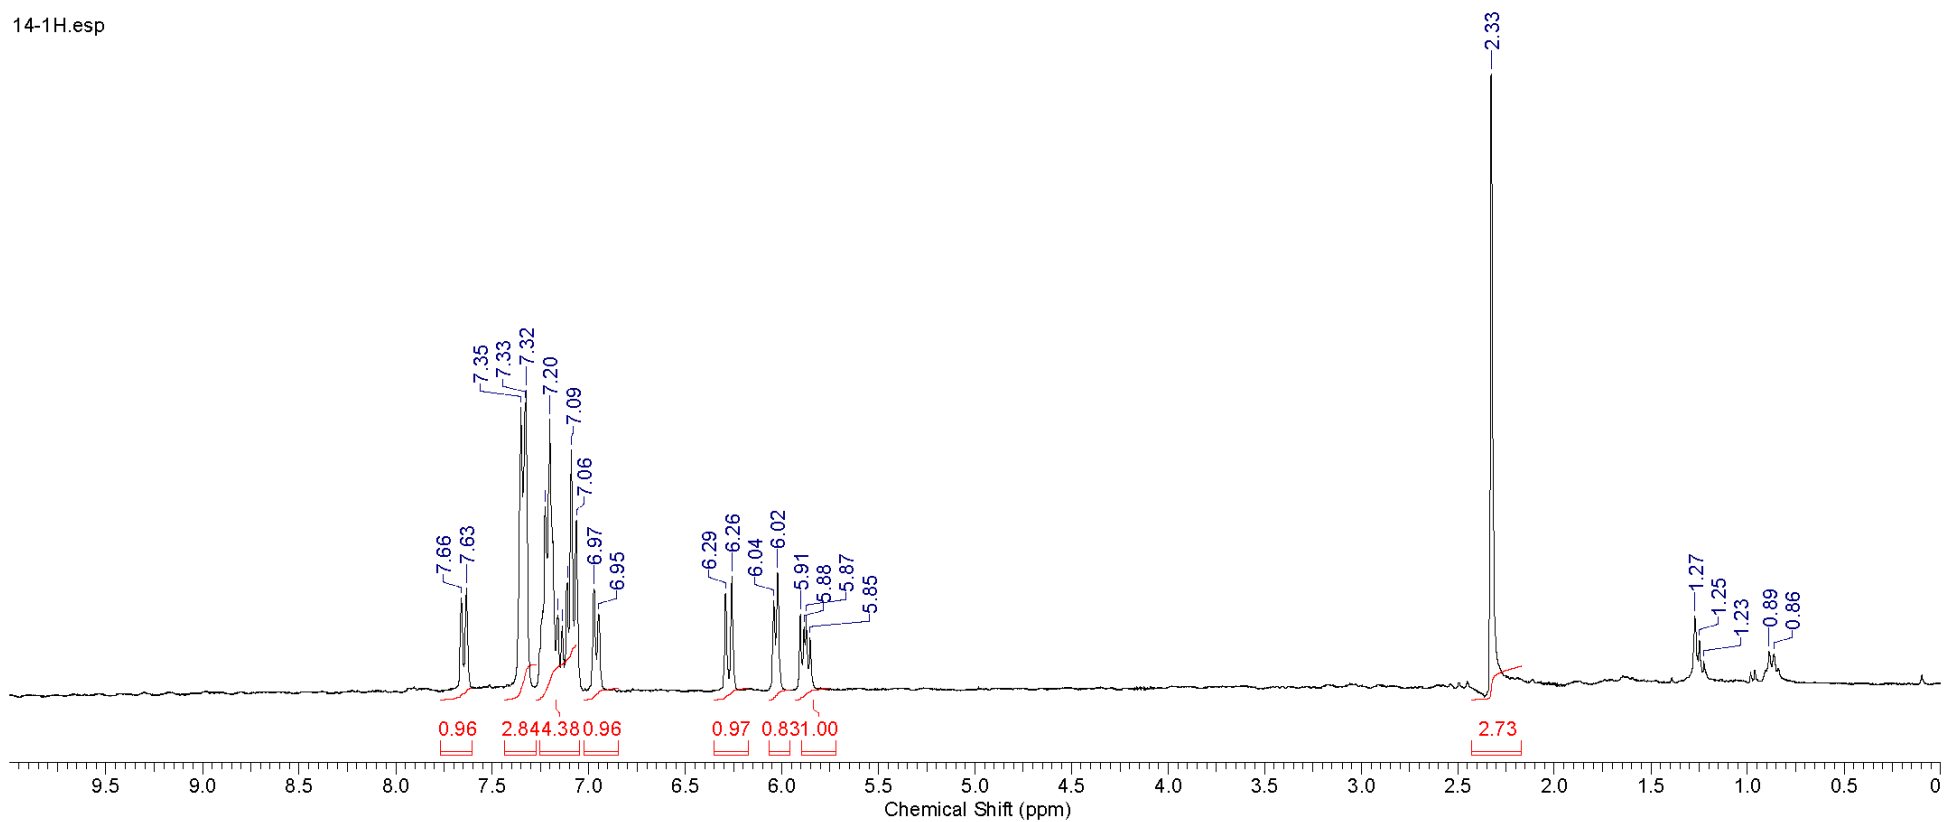

Formula C<sub>22</sub>H<sub>19</sub>NO<sub>2</sub>S FW 361.4568

|                        |                                                      |                       |              |                                            |             |                |             |
|------------------------|------------------------------------------------------|-----------------------|--------------|--------------------------------------------|-------------|----------------|-------------|
| Acquisition Time (sec) | 1.8150                                               | Comment               | CC138-13C    | Date                                       | May 26 2011 | Date Stamp     | May 26 2011 |
| File Name              | C:\Users\User\Desktop\adam\CCclean\CC138-13C.fid\fid |                       |              | Frequency (MHz)                            | 75.46       | Nucleus        | 13C         |
| Number of Transients   | 6028                                                 | Original Points Count | 34053        | Points Count                               | 65536       | Pulse Sequence | s2pul       |
| Receiver Gain          | 28.00                                                | Solvent               | CHLOROFORM-d | Spectrum Offset (Hz)                       |             | 7535.3623      |             |
| Spectrum Type          | STANDARD                                             | Sweep Width (Hz)      | 18761.73     | Temperature (degree C) AMBIENT TEMPERATURE |             |                |             |

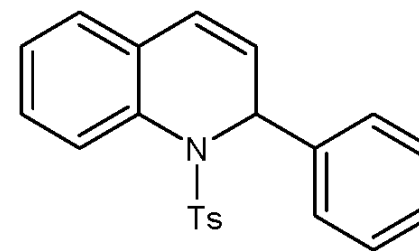

14-13C.esp

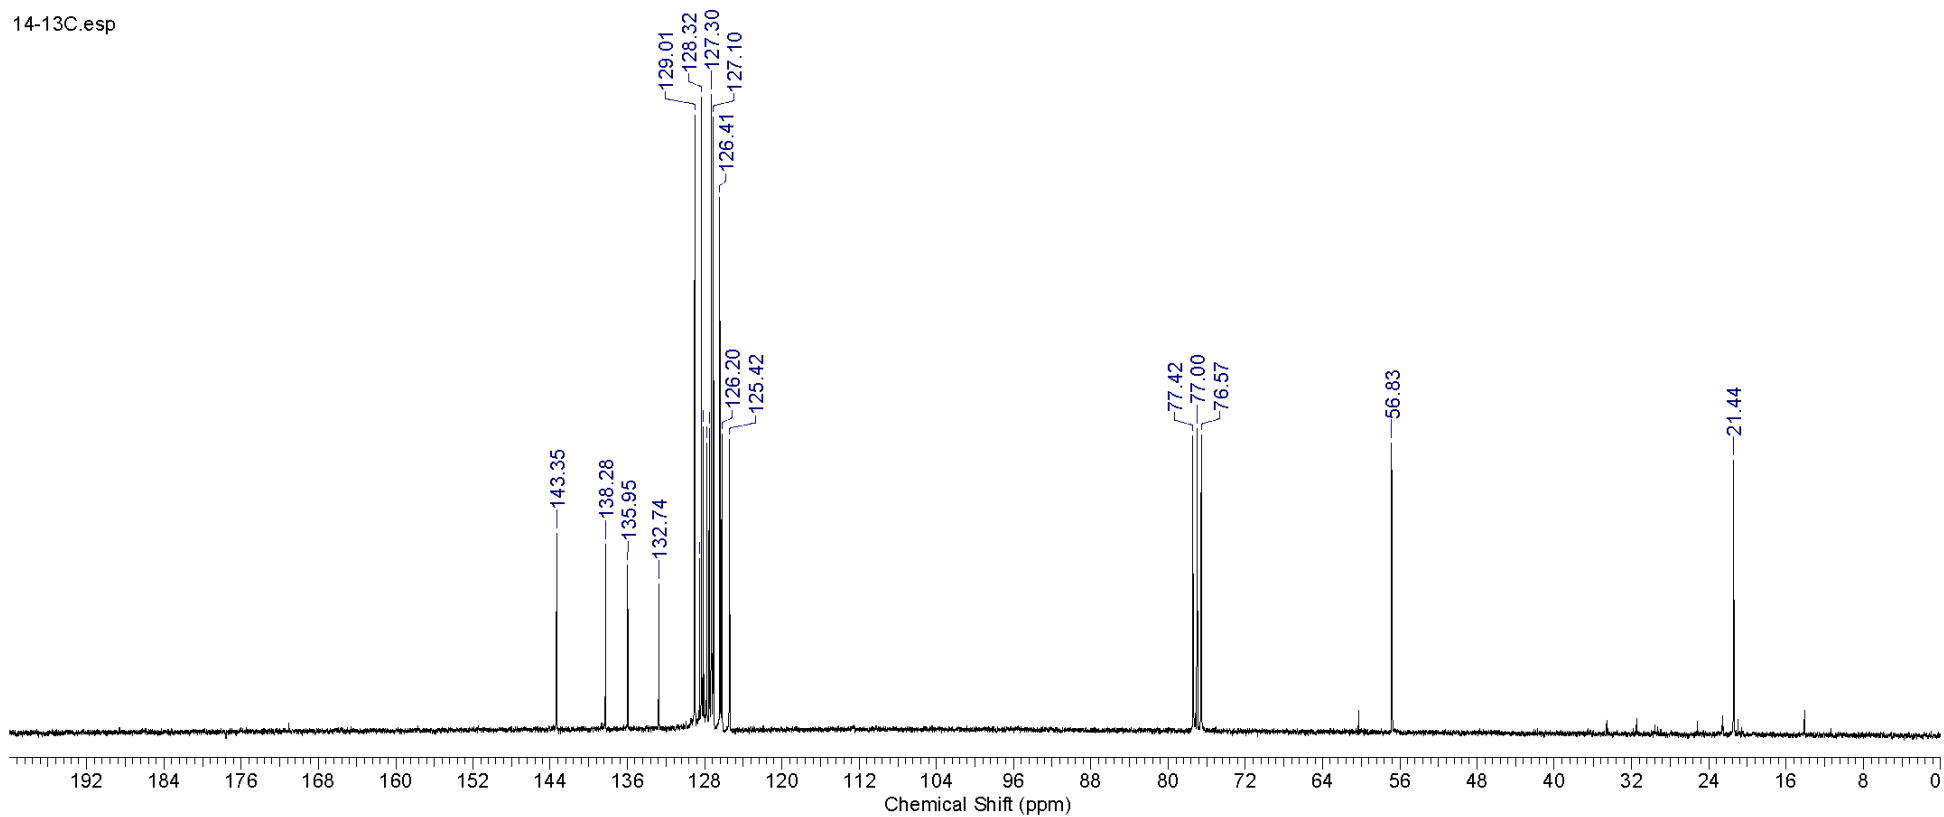

Supplement: c7ra08784e1.pdf [file c7ra08784e1.pdf]
